# Supplementary material for: Transcriptomic Analysis Reveal the Molecular Mechanisms of Wheat Higher-Temperature Seedling-Plant Resistance to Puccinia striiformis f. sp. tritici
Source: Front Plant Sci. 2018 Feb 28;9:240. doi: 10.3389/fpls.2018.00240 (PMC5835723; doi:10.3389/fpls.2018.00240)
Supplement: Data S1 — Chromosome location and annotation of differentially expressed genes (DEGs) in normal-higher-normal (NHN) temperature treatment vs. normal (N) (I*T) and NHN vs. higher (H) (I*T) temperature treatments. [file DataSheet1.XLSX]

## Sheet: Data analysis
	HvsNHN	NHNvsN	SUM (Redundancy)	SUM (No redundancy)	Order	Total number of located DEGs (no redundancy)	The proportion of DEGs in each chromosome
1A	154	71	225	216	5	3731	0.0578933
1B	113	55	168	159	13	3731	0.0426159
1D	64	39	103	98	19	3731	0.0262664
2A	151	68	219	213	6	3731	0.0570893
2B	194	102	296	275	3	3731	0.0737068
2D	121	53	174	164	11	3731	0.043956
3A	80	43	123	117	17	3731	0.0313589
3B	314	145	459	457	1	3731	0.122487
3D	79	39	118	118	16	3731	0.0316269
4A	125	57	182	166	10	3731	0.0444921
4B	112	55	167	163	12	3731	0.043688
4D	92	29	121	128	14	3731	0.0343072
5A	64	19	83	84	20	3731	0.0225141
5B	213	113	326	298	2	3731	0.0798713
5D	154	74	228	226	4	3731	0.0605736
6A	115	52	167	170	9	3731	0.0455642
6B	51	19	70	72	21	3731	0.0192978
6D	128	54	182	183	8	3731	0.0490485
7A	97	29	126	122	15	3731	0.032699
7B	58	44	102	110	18	3731	0.0294827
7D	130	52	182	192	7	3731	0.0514607
			3821	3731			1
Located on B chromosomes				0.41115
Located on D chromosomes				0.297239
Located on A chromosomes				0.291611

## Sheet: DEGs locational information
Number	Gene ID	Chromosome	chr_start position	chr_end	E-value
1	TR186665_c0_g3_i2	1A	65551	67438	0
2	TR237665_c0_g1_i2	1A	791914	794690	0
3	TR232223_c0_g1_i1	1A	2547013	2548072	0
4	TR182688_c1_g1_i2	1A	3045791	3048547	0
5	TR239149_c1_g1_i1	1A	9035749	9038101	0
6	TR155362_c0_g1_i1	1A	46618430	46622623	0
7	TR180472_c0_g4_i4	1A	49010263	49012386	0
8	TR190812_c0_g1_i2	1A	50522937	50524171	0
9	TR153437_c1_g1_i1	1A	50962667	50966165	0
10	TR237492_c0_g1_i2	1A	51641072	51643218	0
11	TR206829_c0_g1_i2	1A	75039139	75042581	0
12	TR122209_c0_g1_i1	1A	89529074	89530324	0
13	TR188191_c6_g1_i2	1A	93445211	93451804	0
14	TR223509_c5_g2_i6	1A	116014939	116018581	0
15	TR209911_c0_g1_i4	1A	183180552	183181281	0
16	TR214549_c1_g1_i1	1A	186227286	186229705	0
17	TR182393_c0_g2_i1	1A	190932683	190938731	0
18	TR164985_c0_g1_i11	1A	194464004	194467212	0
19	TR170927_c5_g1_i2	1A	195907932	195910475	0
20	TR198158_c0_g1_i1	1A	199247721	199250553	0
21	TR219791_c2_g1_i1	1A	199288318	199295940	0
22	TR198668_c1_g1_i3	1A	205284603	205287609	0
23	TR207114_c4_g1_i1	1A	205633459	205635209	0
24	TR207114_c4_g1_i8	1A	205633459	205635209	0
25	TR207114_c4_g1_i9	1A	205633459	205635209	0
26	TR226636_c0_g2_i1	1A	213980898	213983680	0
27	TR216067_c0_g1_i3	1A	220794903	220798392	0
28	TR96705_c0_g1_i2	1A	221620184	221620675	0
29	TR237964_c0_g3_i10	1A	222313103	222317445	0
30	TR196264_c0_g1_i1	1A	225189569	225192935	0
31	TR205971_c5_g2_i2	1A	226826917	226834712	0
32	TR89440_c0_g1_i2	1A	227924509	227925609	0
33	TR129596_c0_g1_i1	1A	230869169	230871718	0
34	TR162208_c0_g2_i1	1A	231320789	231322348	0
35	TR162208_c0_g2_i2	1A	231320789	231322348	0
36	TR189405_c1_g2_i1	1A	231383319	231391479	0
37	TR189405_c1_g2_i3	1A	231383319	231391479	0
38	TR215184_c1_g1_i1	1A	233572793	233579027	0
39	TR196283_c2_g4_i4	1A	235220311	235221190	0
40	TR196283_c2_g4_i7	1A	235220311	235221190	0
41	TR207695_c0_g2_i9	1A	244421324	244422577	0
42	TR93872_c0_g1_i1	1A	245517878	245518438	0
43	TR115079_c0_g1_i3	1A	247396429	247400227	0
896	TR192420_c1_g1_i8	1A	204365399	204366421	1e-170
907	TR198129_c2_g1_i1	1A	204612328	204613619	1e-167
916	TR196234_c3_g1_i4	1A	220260366	220262613	1e-163
950	TR149134_c1_g1_i3	1A	29394218	29398817	2e-148
959	TR235659_c9_g1_i3	1A	198010320	198011283	5e-145
981	TR153755_c2_g2_i3	1A	209237807	209239321	1e-137
983	TR169738_c1_g1_i2	1A	240338461	240339461	6e-137
985	TR229760_c0_g2_i1	1A	230487029	230490805	8e-137
989	TR94806_c0_g1_i2	1A	228926843	228928144	1e-135
1002	TR136986_c0_g1_i1	1A	244249610	244254636	4e-130
1020	TR210474_c0_g1_i2	1A	41938204	41939609	9e-125
1040	TR111983_c0_g1_i1	1A	1527571	1531324	8e-118
1045	TR159189_c1_g1_i3	1A	209247622	209247875	4e-117
1054	TR234925_c2_g1_i1	1A	209237807	209239321	2e-113
1059	TR141352_c0_g2_i1	1A	235220311	235221190	3e-112
1078	TR235848_c0_g1_i3	1A	232259560	232260710	3e-104
1084	TR106276_c0_g1_i3	1A	218994163	218994703	6e-103
1100	TR191564_c0_g1_i4	1A	1737088	1737425	4e-99
1109	TR175619_c5_g1_i5	1A	210189391	210191737	9e-96
1127	TR196283_c0_g1_i1	1A	235220311	235221190	9e-92
1131	TR207695_c0_g1_i2	1A	244421324	244422577	4e-90
1142	TR151575_c0_g2_i2	1A	84394707	84408947	3e-86
1149	TR155758_c0_g1_i15	1A	232907814	232908255	2e-84
1154	TR89124_c0_g1_i1	1A	240553240	240558475	5e-81
1168	TR175660_c1_g1_i1	1A	233586562	233590588	3e-77
1180	TR172214_c0_g2_i2	1A	226502151	226503255	8e-75
1189	TR121252_c0_g1_i2	1A	1858620	1861430	5e-71
1202	TR169738_c1_g1_i1	1A	240338461	240339461	2e-67
1208	TR223530_c1_g1_i2	1A	218337502	218340931	3e-66
1218	TR159209_c6_g1_i1	1A	241847528	241850090	2e-61
1231	TR192252_c0_g2_i2	1A	186197793	186199172	2e-57
1237	TR45806_c0_g1_i1	1A	105730583	105731050	2e-55
1250	TR235412_c0_g1_i3	1A	242308895	242309099	6e-50
1252	TCONS_00003728	1A	65551	66018
1253	TCONS_00007289	1A	678569	679520
1254	TCONS_00000031	1A	1527571	1528404
1255	TCONS_00000057	1A	1989259	1989290
1256	TCONS_00003800	1A	2028437	2029444
1257	TCONS_00003807	1A	2207556	2207990
1258	TCONS_00003885	1A	3222564	3225650
1259	TCONS_00000102	1A	3430893	3431132
1260	TCONS_00000115	1A	3730675	3731449
1261	TCONS_00003907	1A	4344511	4345973
1262	TCONS_00003938	1A	5894582	5896693
1263	TCONS_00007321	1A	7651327	7652204
1264	TCONS_00004001	1A	8495631	8495713
1265	TCONS_00000278	1A	11203446	11204955
1266	TCONS_00004094	1A	13376232	13378485
1267	TCONS_00004123	1A	15665185	15665863
1268	TCONS_00000432	1A	20052212	20052548
1269	TCONS_00004179	1A	20082255	20082548
1270	TCONS_00004206	1A	22158671	22159572
1271	TCONS_00007376	1A	22696020	22696940
1272	TCONS_00000454	1A	23990192	23990885
1273	TCONS_00004256	1A	26189311	26189623
1274	TCONS_00004341	1A	33502950	33503572
1275	TCONS_00000554	1A	34337860	34338329
1276	TCONS_00004401	1A	35130557	35130881
1277	TCONS_00004419	1A	36359075	36362044
1278	TCONS_00007424	1A	39773681	39774365
1279	TCONS_00000727	1A	48387638	48388154
1280	TCONS_00004571	1A	49190672	49191800
1281	TCONS_00004587	1A	50522937	50523391
1282	TCONS_00000781	1A	53915152	53915585
1283	TCONS_00007458	1A	56444931	56446026
1284	TCONS_00000867	1A	58840799	58842086
1285	TCONS_00004761	1A	60251038	60251532
1286	TCONS_00000896	1A	60820981	60821074
1287	TCONS_00000917	1A	61320805	61321391
1288	TCONS_00004830	1A	65620562	65621835
1289	TCONS_00000982	1A	66811412	66811982
1290	TCONS_00000997	1A	67330729	67331204
1291	TCONS_00007498	1A	74101077	74103570
1292	TCONS_00007501	1A	75019142	75019961
1293	TCONS_00001128	1A	77776204	77776494
1294	TCONS_00005138	1A	93161817	93162635
1295	TCONS_00001309	1A	94003433	94003886
1296	TCONS_00001324	1A	94708835	94709397
1297	TCONS_00001332	1A	94781318	94782214
1298	TCONS_00001351	1A	97510966	97511708
1299	TCONS_00005213	1A	101672986	101673440
1300	TCONS_00001463	1A	103854379	103854552
1301	TCONS_00001493	1A	105813628	105813728
1302	TCONS_00001496	1A	105814791	105815010
1303	TCONS_00001547	1A	108266302	108266533
1304	TCONS_00001548	1A	108266302	108266533
1305	TCONS_00005376	1A	113687705	113688104
1306	TCONS_00001614	1A	115648067	115648225
1307	TCONS_00005415	1A	119413441	119414744
1308	TCONS_00005454	1A	123845829	123846447
1309	TCONS_00001709	1A	127826402	127827411
1310	TCONS_00005498	1A	128709992	128711002
1311	TCONS_00007658	1A	139147031	139148392
1312	TCONS_00005581	1A	140271750	140273999
1313	TCONS_00005595	1A	142319906	142320284
1314	TCONS_00001877	1A	155152910	155153264
1315	TCONS_00005688	1A	157604706	157605678
1316	TCONS_00001932	1A	159716639	159717036
1317	TCONS_00001975	1A	164658879	164658937
1318	TCONS_00001995	1A	166600171	166600548
1319	TCONS_00002064	1A	174009370	174009666
1320	TCONS_00005870	1A	178744572	178745702
1321	TCONS_00005881	1A	179602277	179603240
1322	TCONS_00002133	1A	180673145	180674239
1323	TCONS_00007756	1A	181982175	181983747
1324	TCONS_00002170	1A	182994711	182996227
1325	TCONS_00005995	1A	186197793	186199172
1326	TCONS_00002229	1A	186397405	186397537
1327	TCONS_00002240	1A	187593893	187595118
1328	TCONS_00002328	1A	194464004	194464632
1329	TCONS_00007784	1A	194919455	194920685
1330	TCONS_00006141	1A	195312855	195313349
1331	TCONS_00006180	1A	197829508	197830026
1332	TCONS_00006194	1A	198010320	198010618
1333	TCONS_00006209	1A	198755946	198756982
1334	TCONS_00006234	1A	200335264	200335626
1335	TCONS_00006235	1A	200335449	200338783
1336	TCONS_00002433	1A	200549715	200550562
1337	TCONS_00007817	1A	201753250	201754419
1338	TCONS_00006264	1A	204365399	204366421
1339	TCONS_00006265	1A	204612328	204613619
1340	TCONS_00002485	1A	205048255	205048987
1341	TCONS_00006289	1A	206605855	206606141
1342	TCONS_00006335	1A	210934224	210934676
1343	TCONS_00002581	1A	211279497	211279553
1344	TCONS_00002580	1A	211279497	211279553
1345	TCONS_00002618	1A	212121507	212121750
1346	TCONS_00002639	1A	214007861	214008074
1347	TCONS_00006431	1A	214779677	214779944
1348	TCONS_00006438	1A	215417135	215417475
1349	TCONS_00002670	1A	215464652	215464934
1350	TCONS_00006459	1A	216484377	216485605
1351	TCONS_00002710	1A	217137379	217137625
1352	TCONS_00006494	1A	219082461	219083264
1353	TCONS_00002806	1A	219834122	219834473
1354	TCONS_00002807	1A	219834122	219834473
1355	TCONS_00007893	1A	222778402	222781180
1356	TCONS_00002899	1A	224003634	224003738
1357	TCONS_00006655	1A	224236514	224236618
1358	TCONS_00002919	1A	225601311	225602134
1359	TCONS_00002935	1A	225958070	225958292
1360	TCONS_00002957	1A	226502151	226503255
1361	TCONS_00003048	1A	228753440	228753489
1362	TCONS_00006795	1A	228967557	228968407
1363	TCONS_00006805	1A	229355459	229357294
1364	TCONS_00003119	1A	230709583	230709808
1365	TCONS_00006832	1A	230941738	230942147
1366	TCONS_00006835	1A	231028841	231029105
1367	TCONS_00003126	1A	231301535	231301780
1368	TCONS_00003158	1A	232259560	232259829
1369	TCONS_00006908	1A	233572793	233573189
1370	TCONS_00003266	1A	234429309	234429353
1371	TCONS_00003276	1A	234879787	234880401
1372	TCONS_00006958	1A	235220311	235221190
1373	TCONS_00007955	1A	235509649	235510529
1374	TCONS_00006970	1A	235523477	235524264
1375	TCONS_00007961	1A	235900831	235901913
1376	TCONS_00007969	1A	236474936	236475654
1377	TCONS_00003386	1A	236800623	236801754
1378	TCONS_00007037	1A	237378275	237378953
1379	TCONS_00003404	1A	237704647	237705800
1380	TCONS_00003432	1A	239192201	239192695
1381	TCONS_00007082	1A	239901272	239901670
1382	TCONS_00003545	1A	243498516	243499358
1383	TCONS_00007202	1A	244099731	244100339
1384	TCONS_00003575	1A	244421324	244422319
1385	TCONS_00003592	1A	244562262	244563859
1386	TCONS_00007221	1A	244811924	244812238
1387	TCONS_00003610	1A	245055352	245056151
1388	TCONS_00003617	1A	245398783	245399348
1389	TCONS_00008010	1A	245554961	245555458
1390	TCONS_00003621	1A	245688616	245689297
1391	TCONS_00003632	1A	246325120	246325462			0
44	TR233355_c3_g2_i2	1B	652973	655179	0
45	TR209114_c1_g1_i3	1B	5848416	5854850	0
46	TR209114_c1_g1_i2	1B	5848416	5854850	0
47	TR174015_c0_g1_i2	1B	13813502	13816311	0
48	TR164426_c0_g1_i2	1B	18205127	18206243	0
49	TR44872_c0_g1_i1	1B	23717398	23718226	0
50	TR79917_c0_g1_i1	1B	31141946	31146628	0
51	TR212171_c0_g1_i4	1B	44757578	44759493	0
52	TR191032_c0_g1_i1	1B	47152542	47153681	0
53	TR150530_c0_g1_i3	1B	69342577	69343385	0
54	TR157551_c0_g1_i3	1B	141254884	141256408	0
55	TR165033_c1_g1_i4	1B	160346507	160347839	0
56	TR170724_c2_g1_i1	1B	165327123	165328559	0
57	TR195424_c1_g1_i1	1B	176660592	176663887	0
58	TR210489_c0_g1_i2	1B	182047189	182049850	0
59	TR226214_c0_g1_i6	1B	206166970	206172303	0
60	TR176778_c0_g1_i2	1B	209797483	209799031	0
61	TR181844_c1_g1_i5	1B	211943164	211945732	0
62	TR164146_c0_g3_i3	1B	214111295	214115139	0
63	TR148250_c1_g1_i2	1B	214945304	214953329	0
64	TR215829_c1_g2_i5	1B	223466479	223470754	0
65	TR221162_c0_g1_i3	1B	227279575	227282509	0
66	TR221162_c0_g1_i2	1B	227279575	227282509	0
67	TR231793_c0_g1_i6	1B	261660565	261662468	0
68	TR205481_c1_g1_i1	1B	276490601	276492179	0
69	TR204446_c3_g9_i4	1B	285464768	285470546	0
70	TR106526_c1_g3_i3	1B	287314476	287319019	0
71	TR231128_c0_g1_i1	1B	293339232	293342174	0
1027	TR95504_c0_g1_i3	1B	111974827	111980231	6e-123
1034	TR164726_c1_g1_i9	1B	179734807	179737236	1e-120
1041	TR175716_c0_g1_i1	1B	83224294	83226141	1e-117
1042	TR230244_c2_g2_i6	1B	244795747	244810464	1e-117
1043	TR230244_c2_g2_i2	1B	244795747	244810464	2e-117
1044	TR230244_c2_g2_i1	1B	244795747	244810464	2e-117
1060	TR151110_c2_g2_i2	1B	283077112	283078986	3e-112
1082	TR222930_c6_g4_i3	1B	2228407	2240621	3e-103
1119	TR223127_c1_g1_i2	1B	295085160	295089716	1e-93
1121	TR219372_c1_g1_i6	1B	225844704	225847811	2e-93
1125	TR230302_c2_g1_i5	1B	286609752	286610202	3e-92
1129	TR230302_c2_g1_i8	1B	286609752	286610202	2e-90
1157	TR77860_c0_g1_i1	1B	116471019	116471952	1e-80
1185	TR140189_c0_g1_i2	1B	215244451	215246718	4e-73
1213	TR221162_c0_g1_i4	1B	227279575	227282509	9e-65
1392	TCONS_00012295	1B	880274	881681
1393	TCONS_00008046	1B	1472642	1472810
1394	TCONS_00008094	1B	2836660	2836715
1395	TCONS_00008154	1B	5848416	5848659
1396	TCONS_00012445	1B	7882521	7884662
1397	TCONS_00012495	1B	9506876	9507317
1398	TCONS_00012500	1B	9892582	9893639
1399	TCONS_00012525	1B	10400003	10400369
1400	TCONS_00008251	1B	11139359	11139602
1401	TCONS_00012539	1B	11696975	11697327
1402	TCONS_00012581	1B	14119096	14119541
1403	TCONS_00012656	1B	20449267	20449751
1404	TCONS_00012732	1B	25195888	25196276
1405	TCONS_00008537	1B	33965346	33966056
1406	TCONS_00012989	1B	41200624	41201039
1407	TCONS_00013018	1B	45636797	45637189
1408	TCONS_00008760	1B	51217842	51218256
1409	TCONS_00016861	1B	51936935	51937852
1410	TCONS_00013152	1B	52982069	52982130
1411	TCONS_00013258	1B	57836330	57837701
1412	TCONS_00013344	1B	65717978	65718579
1413	TCONS_00016891	1B	67664645	67665710
1414	TCONS_00013378	1B	69106098	69107109
1415	TCONS_00013387	1B	69753800	69754874
1416	TCONS_00016900	1B	74359158	74360446
1417	TCONS_00013443	1B	77079110	77079445
1418	TCONS_00009182	1B	87061253	87061281
1419	TCONS_00009222	1B	89187035	89188135
1420	TCONS_00009245	1B	90853301	90854814
1421	TCONS_00009356	1B	103992238	103992441
1422	TCONS_00013875	1B	109411611	109413757
1423	TCONS_00009396	1B	109645881	109646737
1424	TCONS_00016963	1B	109734354	109738292
1425	TCONS_00009421	1B	110554739	110555110
1426	TCONS_00009435	1B	112473375	112473647
1427	TCONS_00009470	1B	115315675	115317046
1428	TCONS_00009517	1B	116434556	116436969
1429	TCONS_00013996	1B	117046327	117046811
1430	TCONS_00014005	1B	118359728	118361027
1431	TCONS_00009640	1B	125302966	125304315
1432	TCONS_00014116	1B	129309266	129309791
1433	TCONS_00014100	1B	129309266	129309791
1434	TCONS_00009762	1B	132497388	132497929
1435	TCONS_00014335	1B	142407745	142408162
1436	TCONS_00014370	1B	145171122	145171713
1437	TCONS_00017048	1B	153125570	153127743
1438	TCONS_00014492	1B	154105000	154105357
1439	TCONS_00017054	1B	158500642	158503527
1440	TCONS_00017055	1B	158978542	158980024
1441	TCONS_00014573	1B	161199336	161199738
1442	TCONS_00010365	1B	174931716	174932045
1443	TCONS_00014782	1B	176284586	176285761
1444	TCONS_00014785	1B	176416376	176416893
1445	TCONS_00014808	1B	177114538	177115219
1446	TCONS_00014819	1B	177114538	177115219
1447	TCONS_00014852	1B	178585827	178588506
1448	TCONS_00010416	1B	179106387	179106677
1449	TCONS_00010462	1B	180417355	180417402
1450	TCONS_00014906	1B	180549735	180549931
1451	TCONS_00014938	1B	184046745	184048658
1452	TCONS_00010606	1B	191232648	191233020
1453	TCONS_00015030	1B	191233362	191233925
1454	TCONS_00015068	1B	191858607	191859009
1455	TCONS_00015095	1B	193519151	193519811
1456	TCONS_00015120	1B	195906037	195906788
1457	TCONS_00015135	1B	196429391	196429780
1458	TCONS_00017126	1B	197617501	197618584
1459	TCONS_00017139	1B	204945146	204946752
1460	TCONS_00010774	1B	206510042	206510901
1461	TCONS_00010815	1B	209352432	209352673
1462	TCONS_00017149	1B	211377929	211379293
1463	TCONS_00015391	1B	214994867	214995672
1464	TCONS_00015498	1B	222058160	222058176
1465	TCONS_00015512	1B	223479032	223481705
1466	TCONS_00011074	1B	227279575	227279734
1467	TCONS_00017197	1B	231538517	231538720
1468	TCONS_00015643	1B	233697013	233697671
1469	TCONS_00011187	1B	238192252	238193032
1470	TCONS_00011199	1B	239039776	239040318
1471	TCONS_00015706	1B	240726158	240727315
1472	TCONS_00015715	1B	241525971	241529262
1473	TCONS_00011226	1B	241759786	241762907
1474	TCONS_00017216	1B	242371833	242372917
1475	TCONS_00011324	1B	248097962	248099702
1476	TCONS_00011330	1B	248098499	248098889
1477	TCONS_00015842	1B	248901268	248901903
1478	TCONS_00015856	1B	250369762	250370438
1479	TCONS_00015940	1B	256996520	256997151
1480	TCONS_00015959	1B	258095091	258095606
1481	TCONS_00017269	1B	259972061	259974208
1482	TCONS_00011495	1B	260034238	260034375
1483	TCONS_00011507	1B	260764453	260764901
1484	TCONS_00011620	1B	269044677	269044783
1485	TCONS_00017288	1B	269099590	269100144
1486	TCONS_00016124	1B	269118971	269119683
1487	TCONS_00016162	1B	269288838	269289653
1488	TCONS_00016165	1B	269520119	269520185
1489	TCONS_00011656	1B	270330647	270330737
1490	TCONS_00011736	1B	274604583	274604694
1491	TCONS_00016232	1B	274737136	274737344
1492	TCONS_00017309	1B	274795531	274796460
1493	TCONS_00011853	1B	278340219	278340867
1494	TCONS_00016301	1B	278375699	278375827
1495	TCONS_00017336	1B	280842293	280843345
1496	TCONS_00016357	1B	281567087	281567532
1497	TCONS_00016358	1B	281567142	281567532
1498	TCONS_00011956	1B	283347908	283347973
1499	TCONS_00011975	1B	284166965	284167429
1500	TCONS_00016428	1B	284602158	284602503
1501	TCONS_00012039	1B	287343471	287343806
1502	TCONS_00012063	1B	288264405	288265292
1503	TCONS_00012101	1B	288977780	288978122
1504	TCONS_00016577	1B	289146130	289146598
1505	TCONS_00016648	1B	292320166	292320431
1506	TCONS_00012141	1B	292325667	292326171
1507	TCONS_00012209	1B	293774691	293774859
72	TR209885_c0_g1_i1	1D	10399	13488	0
73	TR172550_c1_g1_i2	1D	6916565	6918124	0
74	TR189200_c3_g1_i2	1D	14745255	14759701	0
75	TR183458_c2_g1_i3	1D	22598296	22607033	0
76	TR226244_c1_g2_i5	1D	26025449	26027694	0
77	TR205847_c6_g1_i2	1D	36437125	36440198	0
78	TR205847_c6_g1_i5	1D	36437125	36440198	0
79	TR205847_c6_g1_i4	1D	36437125	36440198	0
80	TR185603_c0_g1_i1	1D	59740895	59743632	0
81	TR219384_c0_g1_i1	1D	70882162	70883423	0
82	TR185531_c3_g1_i1	1D	80790173	80793766	0
83	TR171658_c2_g5_i5	1D	80852235	80855181	0
84	TR150492_c0_g1_i1	1D	82113861	82119759	0
85	TR151596_c1_g1_i3	1D	93818790	93820691	0
86	TR151227_c0_g1_i2	1D	108981156	108982418	0
87	TR185200_c0_g1_i1	1D	117533270	117534157	0
88	TR237484_c6_g2_i8	1D	129312165	129314646	0
927	TR178751_c0_g2_i3	1D	65522309	65523238	1e-158
960	TR177206_c1_g2_i7	1D	118900263	118900946	6e-145
967	TR230463_c1_g1_i2	1D	3016954	3019108	6e-143
968	TR227111_c1_g8_i1	1D	12660908	12664749	7e-143
1003	TR178798_c1_g1_i10	1D	21158507	21160664	6e-130
1035	TR214246_c1_g1_i4	1D	130978170	130979826	5e-120
1058	TR238545_c0_g1_i1	1D	93818790	93820691	6e-113
1065	TR95687_c1_g1_i1	1D	953191	953409	3e-110
1105	TR83037_c0_g1_i1	1D	127016040	127016933	5e-97
1137	TR111205_c0_g1_i1	1D	9224038	9225255	2e-87
1165	TR198898_c4_g1_i1	1D	734526	736971	8e-78
1177	TR97818_c0_g1_i2	1D	123221738	123224473	4e-75
1183	TR141761_c0_g2_i1	1D	114606454	114607906	1e-73
1187	TR32495_c0_g1_i1	1D	7042148	7045046	2e-72
1192	TR124356_c0_g1_i1	1D	133639501	133651942	4e-70
1216	TR151596_c1_g1_i2	1D	93818790	93820691	2e-62
1222	TR203944_c1_g1_i1	1D	124195148	124195615	1e-59
1238	TR214246_c1_g1_i1	1D	130978170	130979826	2e-55
1508	TCONS_00020138	1D	928870	928920
1509	TCONS_00017486	1D	2453962	2456672
1510	TCONS_00017505	1D	3253390	3254850
1511	TCONS_00020222	1D	3260651	3261336
1512	TCONS_00020299	1D	6063057	6063469
1513	TCONS_00020371	1D	11076598	11077166
1514	TCONS_00017691	1D	11995106	11997494
1515	TCONS_00017754	1D	15260727	15260929
1516	TCONS_00017860	1D	19942678	19942771
1517	TCONS_00020587	1D	25826712	25827828
1518	TCONS_00017955	1D	30764458	30764691
1519	TCONS_00020714	1D	33199686	33200506
1520	TCONS_00018041	1D	33577104	33577301
1521	TCONS_00018103	1D	36885885	36886250
1522	TCONS_00018244	1D	43486309	43486390
1523	TCONS_00018255	1D	44111002	44112089
1524	TCONS_00018289	1D	47638267	47638598
1525	TCONS_00018363	1D	54204786	54206271
1526	TCONS_00018367	1D	54314626	54316951
1527	TCONS_00018432	1D	56937244	56937925
1528	TCONS_00021140	1D	59740895	59741396
1529	TCONS_00018546	1D	61357213	61358064
1530	TCONS_00021203	1D	64447533	64448102
1531	TCONS_00022745	1D	66370327	66370769
1532	TCONS_00018661	1D	67146976	67147542
1533	TCONS_00018672	1D	67348465	67348949
1534	TCONS_00021268	1D	70828693	70829583
1535	TCONS_00021282	1D	71267842	71268842
1536	TCONS_00018755	1D	73216404	73216684
1537	TCONS_00021399	1D	79621096	79621841
1538	TCONS_00018875	1D	80218064	80218933
1539	TCONS_00018883	1D	80852235	80852345
1540	TCONS_00022798	1D	82143893	82144626
1541	TCONS_00021444	1D	83498870	83498935
1542	TCONS_00021523	1D	88022411	88022430
1543	TCONS_00021549	1D	90547400	90547846
1544	TCONS_00021561	1D	90742090	90743297
1545	TCONS_00019117	1D	91966175	91966271
1546	TCONS_00019317	1D	100771724	100771765
1547	TCONS_00019343	1D	101482202	101482238
1548	TCONS_00022872	1D	104107014	104110530
1549	TCONS_00021793	1D	105923389	105928657
1550	TCONS_00019409	1D	105953217	105955857
1551	TCONS_00022885	1D	107004600	107004987
1552	TCONS_00022887	1D	107179866	107182357
1553	TCONS_00021941	1D	112338742	112339283
1554	TCONS_00021976	1D	114265019	114265648
1555	TCONS_00019676	1D	118643003	118643306
1556	TCONS_00019751	1D	121237950	121238115
1557	TCONS_00019762	1D	121670556	121671075
1558	TCONS_00022971	1D	122321482	122323359
1559	TCONS_00022975	1D	122683470	122684078
1560	TCONS_00019801	1D	123894132	123894425
1561	TCONS_00022304	1D	127013919	127014138
1562	TCONS_00023009	1D	127155688	127156393
1563	TCONS_00019928	1D	129312161	129312376
1564	TCONS_00019971	1D	131553967	131554624
1565	TCONS_00022459	1D	132506493	132507029
1566	TCONS_00019999	1D	132541472	132541660
1567	TCONS_00020000	1D	132541472	132541660
1568	TCONS_00022474	1D	132953183	132953523
1569	TCONS_00022519	1D	133431815	133432268
1570	TCONS_00022549	1D	134345343	134345701
89	TR192192_c2_g1_i8	2A	4948082	4951281	0
90	TR192339_c0_g2_i5	2A	5660860	5663270	0
91	TR181945_c0_g1_i1	2A	6646448	6652491	0
92	TR223066_c0_g3_i1	2A	7039734	7043193	0
93	TR221934_c0_g1_i1	2A	26061968	26063546	0
94	TR221934_c0_g1_i2	2A	26061968	26063546	0
95	TR198928_c2_g1_i1	2A	73489691	73493584	0
96	TR230137_c0_g1_i3	2A	76959748	76960917	0
97	TR165025_c5_g2_i1	2A	78756160	78758547	0
98	TR219189_c0_g2_i5	2A	79528555	79533809	0
99	TR230111_c2_g1_i3	2A	83399516	83402168	0
100	TR148991_c1_g1_i1	2A	83764647	83771040	0
101	TR205455_c0_g1_i3	2A	86000957	86005566	0
102	TR205455_c0_g1_i5	2A	86000957	86005566	0
103	TR226666_c0_g1_i1	2A	89466379	89468318	0
104	TR215183_c0_g1_i1	2A	92301615	92302848	0
105	TR232569_c2_g1_i1	2A	127390647	127395254	0
106	TR215138_c1_g1_i3	2A	129225678	129233167	0
107	TR163567_c1_g1_i5	2A	134374506	134379552	0
108	TR233490_c0_g1_i1	2A	153585538	153588124	0
109	TR198498_c1_g1_i1	2A	157199093	157200503	0
110	TR222347_c0_g1_i1	2A	168775963	168777990	0
111	TR226227_c0_g1_i7	2A	182031652	182034168	0
112	TR172725_c0_g1_i1	2A	188965197	188966363	0
113	TR212128_c0_g1_i2	2A	197268779	197276125	0
114	TR160929_c0_g1_i1	2A	200834222	200836503	0
115	TR230235_c2_g2_i3	2A	201696167	201699777	0
116	TR181960_c2_g1_i1	2A	204235996	204241996	0
117	TR206759_c1_g3_i5	2A	207272545	207277417	0
118	TR185524_c0_g1_i1	2A	211551758	211552632	0
119	TR211282_c1_g1_i1	2A	223697422	223700099	0
120	TR160973_c0_g2_i2	2A	225248619	225250919	0
121	TR238515_c3_g2_i3	2A	231451996	231453459	0
122	TR197642_c3_g1_i16	2A	231930383	231937771	0
123	TR124284_c0_g1_i2	2A	240930015	240931705	0
124	TR90285_c0_g1_i2	2A	250530299	250531496	0
125	TR158541_c0_g1_i3	2A	250730710	250733526	0
126	TR208996_c4_g2_i11	2A	252884174	252887521	0
882	TR158114_c1_g3_i5	2A	55365794	55369976	5e-175
889	TR197611_c2_g1_i2	2A	236676487	236678502	2e-174
904	TR211614_c0_g1_i9	2A	154977690	154979131	1e-168
920	TR238515_c3_g2_i1	2A	231451996	231453459	7e-162
938	TR192192_c2_g1_i3	2A	4948082	4951281	8e-154
955	TR224424_c5_g4_i6	2A	221700585	221701076	5e-148
975	TR77612_c0_g1_i1	2A	214672689	214673557	2e-139
1006	TR192341_c2_g1_i7	2A	251814655	251815681	1e-128
1085	TR196585_c0_g1_i1	2A	15697528	15701218	2e-102
1104	TR180571_c1_g1_i1	2A	58913117	58913647	4e-97
1126	TR192168_c5_g1_i2	2A	246926768	246928689	3e-92
1130	TR208996_c2_g1_i1	2A	252888445	252892439	2e-90
1171	TR155758_c0_g1_i2	2A	252572767	252574098	1e-76
1178	TR155758_c0_g1_i12	2A	252572767	252574098	5e-75
1236	TR211814_c0_g1_i13	2A	8762120	8766031	6e-56
1240	TR204440_c1_g6_i1	2A	193528346	193529392	2e-54
1571	TCONS_00027457	2A	17165	17334
1572	TCONS_00027445	2A	17165	17602
1573	TCONS_00023145	2A	1937415	1940801
1574	TCONS_00027539	2A	2605154	2605565
1575	TCONS_00027547	2A	2693091	2694459
1576	TCONS_00027548	2A	2712296	2712932
1577	TCONS_00023186	2A	2838542	2838742
1578	TCONS_00023192	2A	2923916	2923968
1579	TCONS_00027562	2A	3247597	3247744
1580	TCONS_00027606	2A	3978834	3982970
1581	TCONS_00023270	2A	4620688	4620710
1582	TCONS_00027637	2A	4948057	4949812
1583	TCONS_00023290	2A	5111270	5111364
1584	TCONS_00023299	2A	5660860	5660892
1585	TCONS_00023301	2A	5812028	5812387
1586	TCONS_00027693	2A	6453418	6454856
1587	TCONS_00023342	2A	7019529	7019830
1588	TCONS_00023343	2A	7039734	7040651
1589	TCONS_00027711	2A	7133944	7136049
1590	TCONS_00023348	2A	7255273	7255473
1591	TCONS_00023361	2A	7643230	7644561
1592	TCONS_00027764	2A	8853555	8855763
1593	TCONS_00023417	2A	9331823	9335293
1594	TCONS_00023422	2A	9636899	9640529
1595	TCONS_00023442	2A	10266155	10267729
1596	TCONS_00023444	2A	10266529	10267267
1597	TCONS_00023456	2A	10567650	10567674
1598	TCONS_00023466	2A	10653100	10653378
1599	TCONS_00027823	2A	12050035	12050187
1600	TCONS_00023504	2A	12270054	12270174
1601	TCONS_00027866	2A	13316412	13317061
1602	TCONS_00023616	2A	14679610	14680985
1603	TCONS_00023618	2A	14695979	14697104
1604	TCONS_00023710	2A	19216904	19217140
1605	TCONS_00023716	2A	19674645	19674868
1606	TCONS_00028031	2A	20267308	20269773
1607	TCONS_00028048	2A	21175332	21175662
1608	TCONS_00031893	2A	22584816	22585988
1609	TCONS_00023773	2A	22633325	22633493
1610	TCONS_00031899	2A	26326046	26328015
1611	TCONS_00028126	2A	27768059	27769306
1612	TCONS_00023893	2A	31657003	31657110
1613	TCONS_00028198	2A	34505293	34506111
1614	TCONS_00031923	2A	36575184	36579129
1615	TCONS_00031932	2A	38767050	38769577
1616	TCONS_00028283	2A	39745469	39747434
1617	TCONS_00031945	2A	43241484	43242919
1618	TCONS_00028471	2A	54297785	54297961
1619	TCONS_00028476	2A	54468378	54468792
1620	TCONS_00028486	2A	54614479	54614813
1621	TCONS_00028482	2A	54614479	54614813
1622	TCONS_00028487	2A	54758107	54758604
1623	TCONS_00024185	2A	56916966	56917101
1624	TCONS_00028506	2A	57026544	57027400
1625	TCONS_00024188	2A	57052199	57052629
1626	TCONS_00031975	2A	59328283	59329586
1627	TCONS_00024274	2A	60574856	60575565
1628	TCONS_00024299	2A	60666460	60667690
1629	TCONS_00028670	2A	68559518	68559663
1630	TCONS_00028720	2A	69832792	69833054
1631	TCONS_00024439	2A	70657550	70657603
1632	TCONS_00028823	2A	78104796	78107765
1633	TCONS_00028833	2A	78752110	78754567
1634	TCONS_00024504	2A	79528555	79528779
1635	TCONS_00028887	2A	81331528	81332065
1636	TCONS_00028911	2A	84068167	84068462
1637	TCONS_00028933	2A	85717802	85719337
1638	TCONS_00028965	2A	85963801	85964444
1639	TCONS_00024585	2A	86388397	86389408
1640	TCONS_00029006	2A	89370251	89371344
1641	TCONS_00024661	2A	93178245	93178590
1642	TCONS_00024682	2A	94982448	94983814
1643	TCONS_00029087	2A	96773758	96774073
1644	TCONS_00029086	2A	96773758	96774073
1645	TCONS_00024718	2A	96793614	96793782
1646	TCONS_00024728	2A	97625844	97626102
1647	TCONS_00029133	2A	98881083	98883443
1648	TCONS_00029144	2A	99264173	99264675
1649	TCONS_00029159	2A	100591001	100591600
1650	TCONS_00032096	2A	112183232	112183701
1651	TCONS_00025018	2A	119261716	119261961
1652	TCONS_00025112	2A	126424136	126424444
1653	TCONS_00029459	2A	129324744	129325575
1654	TCONS_00029500	2A	131660745	131661273
1655	TCONS_00025293	2A	140863575	140863761
1656	TCONS_00032168	2A	142314105	142316091
1657	TCONS_00025401	2A	148087409	148087477
1658	TCONS_00025426	2A	150986178	150986589
1659	TCONS_00029777	2A	152623619	152623953
1660	TCONS_00025509	2A	153585538	153586007
1661	TCONS_00029844	2A	154163792	154164041
1662	TCONS_00025556	2A	156169249	156169487
1663	TCONS_00025566	2A	157949749	157950983
1664	TCONS_00025577	2A	159793205	159793292
1665	TCONS_00029985	2A	162777152	162777657
1666	TCONS_00029988	2A	162777152	162777657
1667	TCONS_00029987	2A	162777152	162777657
1668	TCONS_00025613	2A	165626284	165626620
1669	TCONS_00030025	2A	165806415	165808851
1670	TCONS_00025639	2A	166350877	166351251
1671	TCONS_00030058	2A	166665740	166666863
1672	TCONS_00032237	2A	166790826	166795270
1673	TCONS_00025645	2A	166994002	166994292
1674	TCONS_00025647	2A	166994414	166994462
1675	TCONS_00025654	2A	168010680	168011252
1676	TCONS_00025697	2A	171220513	171221054
1677	TCONS_00030125	2A	174445091	174445861
1678	TCONS_00032253	2A	176346122	176348233
1679	TCONS_00025770	2A	178521874	178522351
1680	TCONS_00025900	2A	187392473	187392506
1681	TCONS_00025917	2A	188564801	188565221
1682	TCONS_00030395	2A	195647346	195648766
1683	TCONS_00026110	2A	205113915	205114219
1684	TCONS_00026178	2A	207947323	207950843
1685	TCONS_00030604	2A	210796879	210797334
1686	TCONS_00030643	2A	212941690	212942670
1687	TCONS_00030705	2A	215987685	215988788
1688	TCONS_00026356	2A	217454573	217455190
1689	TCONS_00026439	2A	222251497	222252538
1690	TCONS_00026486	2A	223073104	223075602
1691	TCONS_00026487	2A	223082974	223083945
1692	TCONS_00026517	2A	223741282	223741822
1693	TCONS_00026526	2A	223905825	223905925
1694	TCONS_00026548	2A	225248619	225248728
1695	TCONS_00030900	2A	226202273	226203206
1696	TCONS_00032401	2A	226810569	226811168
1697	TCONS_00030927	2A	227259319	227261174
1698	TCONS_00026658	2A	229265632	229265692
1699	TCONS_00026737	2A	232045256	232045944
1700	TCONS_00031091	2A	233287073	233287676
1701	TCONS_00026782	2A	233441751	233441783
1702	TCONS_00031118	2A	234186976	234188122
1703	TCONS_00031139	2A	235055150	235055577
1704	TCONS_00031146	2A	235138024	235138342
1705	TCONS_00026830	2A	235340490	235341742
1706	TCONS_00026842	2A	235771538	235772109
1707	TCONS_00031174	2A	235833822	235834331
1708	TCONS_00026879	2A	236448391	236448790
1709	TCONS_00026891	2A	236681429	236681636
1710	TCONS_00031213	2A	237691061	237691406
1711	TCONS_00031221	2A	237747495	237747720
1712	TCONS_00031324	2A	239708444	239708559
1713	TCONS_00026994	2A	239981819	239983504
1714	TCONS_00032466	2A	240582234	240583061
1715	TCONS_00027037	2A	241316914	241317025
1716	TCONS_00027153	2A	245087947	245088143
1717	TCONS_00027177	2A	245874824	245875779
1718	TCONS_00027192	2A	246409507	246410102
1719	TCONS_00031508	2A	247099397	247099962
1720	TCONS_00031516	2A	247123759	247124309
1721	TCONS_00027246	2A	248370388	248370758
1722	TCONS_00031615	2A	250271436	250272245
1723	TCONS_00031636	2A	250530299	250531496
1724	TCONS_00031691	2A	251814655	251814920
1725	TCONS_00031701	2A	252055274	252056061
1726	TCONS_00027384	2A	252801683	252802036
1727	TCONS_00027387	2A	252884174	252884413
1728	TCONS_00032542	2A	253167439	253169239
1729	TCONS_00031779	2A	254679576	254680150
127	TR168490_c3_g1_i4	2B	1681453	1686141	0
128	TR184339_c0_g1_i2	2B	5655740	5657884	0
129	TR209034_c0_g1_i2	2B	10166977	10169978	0
130	TR236801_c0_g1_i6	2B	11217947	11219785	0
131	TR171846_c0_g2_i2	2B	11562815	11564325	0
132	TR190640_c0_g1_i1	2B	13797821	13801281	0
133	TR177386_c1_g1_i3	2B	15301631	15305003	0
134	TR192416_c1_g3_i1	2B	16875452	16877230	0
135	TR155745_c1_g2_i1	2B	16934817	16936802	0
136	TR182105_c0_g3_i1	2B	17600053	17605283	0
137	TR222932_c14_g2_i3	2B	17844759	17847591	0
138	TR148930_c0_g1_i6	2B	24204823	24207033	0
139	TR238698_c1_g2_i2	2B	28589455	28594406	0
140	TR167267_c1_g1_i1	2B	31772027	31774198	0
141	TR204275_c0_g1_i3	2B	33476821	33478204	0
142	TR222904_c0_g1_i5	2B	34615238	34617762	0
143	TR174058_c0_g1_i5	2B	34928569	34930231	0
144	TR231154_c0_g1_i1	2B	36879378	36883732	0
145	TR94644_c0_g1_i2	2B	56940458	56942006	0
146	TR163165_c0_g1_i1	2B	57477968	57480083	0
147	TR230142_c0_g1_i3	2B	59135614	59137139	0
148	TR131310_c1_g1_i1	2B	59928862	59930863	0
149	TR105012_c0_g1_i1	2B	65680720	65681745	0
150	TR223324_c2_g1_i2	2B	68609789	68611229	0
151	TR155752_c0_g2_i5	2B	83559080	83560139	0
152	TR192349_c1_g3_i1	2B	83999589	84002728	0
153	TR230102_c0_g1_i2	2B	99112300	99113904	0
154	TR221214_c0_g1_i2	2B	107519355	107522181	0
155	TR195991_c0_g1_i6	2B	111546089	111547659	0
156	TR168822_c0_g1_i8	2B	119173964	119175731	0
157	TR178788_c4_g1_i1	2B	121735329	121736473	0
158	TR230081_c0_g2_i10	2B	124800420	124803625	0
159	TR148328_c0_g1_i1	2B	153132480	153134665	0
160	TR181406_c0_g3_i5	2B	164497848	164503767	0
161	TR236812_c0_g1_i1	2B	173229654	173232672	0
162	TR151090_c1_g1_i2	2B	179734904	179738414	0
163	TR159123_c1_g1_i1	2B	189405142	189407668	0
164	TR190600_c0_g1_i2	2B	194720667	194723065	0
165	TR213004_c3_g3_i2	2B	199565832	199567797	0
166	TR230223_c0_g1_i1	2B	208566864	208574478	0
167	TR166083_c0_g1_i1	2B	209597443	209599727	0
168	TR164169_c1_g1_i10	2B	211207264	211210280	0
169	TR197023_c0_g1_i2	2B	221174060	221178878	0
170	TR189436_c1_g1_i4	2B	229669578	229672108	0
171	TR210485_c0_g2_i3	2B	230782831	230787588	0
172	TR195868_c0_g1_i2	2B	243313992	243318391	0
173	TR195868_c0_g1_i7	2B	243313992	243318391	0
174	TR195868_c0_g1_i3	2B	243313992	243318391	0
175	TR231170_c2_g1_i8	2B	244978658	244984682	0
176	TR184273_c1_g1_i7	2B	246858432	246860956	0
177	TR196949_c0_g1_i7	2B	246858432	246860956	0
178	TR184273_c1_g1_i6	2B	246858432	246860956	0
179	TR183500_c5_g4_i8	2B	250820707	250825259	0
180	TR183500_c5_g4_i2	2B	250820707	250825259	0
181	TR237646_c2_g1_i2	2B	263603140	263605644	0
182	TR211572_c0_g1_i1	2B	266489966	266492372	0
183	TR126793_c0_g2_i1	2B	266865564	266866722	0
184	TR200743_c8_g2_i1	2B	273676994	273678907	0
185	TR178154_c0_g1_i2	2B	284389151	284390826	0
186	TR233178_c0_g2_i4	2B	284884575	284888502	0
187	TR186703_c0_g1_i14	2B	293037800	293039839	0
188	TR228476_c2_g1_i4	2B	295577334	295580285	0
189	TR219907_c1_g1_i6	2B	296683535	296683910	0
190	TR150358_c0_g1_i1	2B	306779911	306780870	0
191	TR237425_c1_g4_i5	2B	309477347	309481053	0
192	TR191084_c0_g1_i2	2B	319317555	319318753	0
193	TR228087_c3_g1_i1	2B	324140031	324142627	0
194	TR184394_c0_g1_i2	2B	331922175	331925831	0
195	TR193870_c0_g1_i1	2B	337939996	337942558	0
196	TR182064_c1_g2_i4	2B	338792919	338794013	0
197	TR203533_c0_g1_i1	2B	340398591	340400247	0
198	TR172712_c0_g1_i2	2B	341405488	341407126	0
199	TR155538_c1_g2_i4	2B	342209431	342210060	0
871	TR126019_c0_g1_i1	2B	263119270	263121904	1e-178
885	TR189391_c3_g2_i4	2B	47231312	47235155	1e-174
947	TR148307_c4_g2_i8	2B	11956520	11957967	2e-149
965	TR225440_c1_g2_i4	2B	342971502	342974794	5e-144
972	TR170015_c3_g1_i3	2B	15994026	15997522	6e-142
977	TR131545_c0_g1_i2	2B	205250007	205252200	3e-139
996	TR176486_c6_g1_i1	2B	242053012	242056344	1e-132
1017	TR211614_c0_g1_i10	2B	51487700	51489627	3e-125
1021	TR165446_c0_g4_i4	2B	94710891	94718594	5e-124
1032	TR191768_c0_g2_i3	2B	227895450	227896583	9e-122
1048	TR224160_c0_g2_i3	2B	223887005	223887323	6e-116
1068	TR202205_c2_g2_i1	2B	6277714	6279105	1e-108
1083	TR234922_c3_g2_i1	2B	304111758	304113339	3e-103
1152	TR97158_c0_g1_i1	2B	324140031	324142627	3e-82
1194	TR192341_c2_g1_i4	2B	333563888	333565106	1e-69
1197	TR154396_c2_g1_i1	2B	176975263	176977968	9e-69
1249	TR193842_c0_g1_i6	2B	311457446	311459824	4e-50
1730	TCONS_00032571	2B	775248	776691
1731	TCONS_00032586	2B	1727743	1728020
1732	TCONS_00032607	2B	3236146	3238284
1733	TCONS_00037984	2B	6277714	6278256
1734	TCONS_00032856	2B	12170313	12172038
1735	TCONS_00032886	2B	13131978	13134352
1736	TCONS_00032927	2B	16461090	16461566
1737	TCONS_00043239	2B	16618398	16620379
1738	TCONS_00038176	2B	16875452	16877230
1739	TCONS_00032935	2B	16934817	16935790
1740	TCONS_00043248	2B	18313848	18315254
1741	TCONS_00038254	2B	22540482	22542905
1742	TCONS_00038262	2B	23334096	23334964
1743	TCONS_00038286	2B	24767837	24768174
1744	TCONS_00038301	2B	26426134	26428531
1745	TCONS_00033161	2B	27222161	27222595
1746	TCONS_00038305	2B	27229352	27230194
1747	TCONS_00033211	2B	30185498	30185833
1748	TCONS_00033234	2B	31772027	31772430
1749	TCONS_00033276	2B	34615238	34617762
1750	TCONS_00038407	2B	34928569	34929945
1751	TCONS_00038474	2B	38636442	38636542
1752	TCONS_00038508	2B	40162717	40163478
1753	TCONS_00043305	2B	43001309	43004566
1754	TCONS_00033458	2B	44373941	44374279
1755	TCONS_00033465	2B	44727261	44728752
1756	TCONS_00038650	2B	47046877	47047535
1757	TCONS_00033534	2B	47407360	47408024
1758	TCONS_00038687	2B	47849509	47849950
1759	TCONS_00043322	2B	50201626	50202791
1760	TCONS_00038730	2B	50694923	50695242
1761	TCONS_00033579	2B	51487520	51488704
1762	TCONS_00033588	2B	51678002	51678031
1763	TCONS_00038837	2B	56033593	56034291
1764	TCONS_00033668	2B	57477968	57479194
1765	TCONS_00038875	2B	58471313	58471959
1766	TCONS_00033696	2B	59135614	59136024
1767	TCONS_00038885	2B	59404887	59405462
1768	TCONS_00033738	2B	60582863	60582884
1769	TCONS_00033742	2B	60618760	60621649
1770	TCONS_00033747	2B	61360719	61360838
1771	TCONS_00038999	2B	64841972	64842391
1772	TCONS_00033849	2B	65528152	65528631
1773	TCONS_00033889	2B	68914349	68917941
1774	TCONS_00039065	2B	69432733	69434621
1775	TCONS_00033911	2B	71783452	71783700
1776	TCONS_00039113	2B	76568488	76568964
1777	TCONS_00033978	2B	77000084	77001220
1778	TCONS_00039119	2B	78076834	78077548
1779	TCONS_00039140	2B	80538776	80539775
1780	TCONS_00034004	2B	82646819	82647932
1781	TCONS_00039236	2B	85629394	85632128
1782	TCONS_00034052	2B	85944508	85944864
1783	TCONS_00034062	2B	87273958	87274429
1784	TCONS_00034069	2B	87552207	87552657
1785	TCONS_00034070	2B	87552359	87552657
1786	TCONS_00034117	2B	91520473	91521006
1787	TCONS_00034142	2B	93761110	93761463
1788	TCONS_00034143	2B	93761110	93761463
1789	TCONS_00039361	2B	93863213	93864494
1790	TCONS_00039446	2B	98779955	98780572
1791	TCONS_00034244	2B	100551216	100551432
1792	TCONS_00034253	2B	101173008	101173092
1793	TCONS_00034296	2B	103594516	103594906
1794	TCONS_00034336	2B	106211018	106211327
1795	TCONS_00034337	2B	106211018	106211327
1796	TCONS_00034352	2B	107201811	107202243
1797	TCONS_00034363	2B	107516766	107516949
1798	TCONS_00039616	2B	110808106	110809200
1799	TCONS_00039684	2B	113051714	113052996
1800	TCONS_00034432	2B	114648112	114648217
1801	TCONS_00039755	2B	117183252	117184190
1802	TCONS_00039754	2B	117183252	117185454
1803	TCONS_00039760	2B	117634285	117635768
1804	TCONS_00034495	2B	119173777	119174047
1805	TCONS_00039826	2B	121594392	121594777
1806	TCONS_00034558	2B	123797346	123798010
1807	TCONS_00034581	2B	124722752	124723016
1808	TCONS_00034589	2B	125467936	125468012
1809	TCONS_00034593	2B	125617864	125618025
1810	TCONS_00043436	2B	129303701	129304680
1811	TCONS_00043438	2B	131098755	131099724
1812	TCONS_00039918	2B	131487974	131488769
1813	TCONS_00043449	2B	135838109	135840641
1814	TCONS_00040031	2B	137182326	137182644
1815	TCONS_00034719	2B	138427098	138427467
1816	TCONS_00034764	2B	141563000	141564589
1817	TCONS_00040175	2B	144822141	144822981
1818	TCONS_00040154	2B	144822141	144822981
1819	TCONS_00040140	2B	144822141	144822981
1820	TCONS_00034840	2B	147266724	147267530
1821	TCONS_00040280	2B	153589976	153590713
1822	TCONS_00034928	2B	157668057	157668312
1823	TCONS_00034956	2B	160332440	160333199
1824	TCONS_00034978	2B	160728515	160728939
1825	TCONS_00040390	2B	161244340	161244866
1826	TCONS_00040407	2B	164497848	164498442
1827	TCONS_00040422	2B	165780791	165781397
1828	TCONS_00035080	2B	170955185	170958110
1829	TCONS_00035132	2B	176054925	176056923
1830	TCONS_00040591	2B	179171101	179173131
1831	TCONS_00035184	2B	179734896	179735278
1832	TCONS_00040623	2B	181036409	181036754
1833	TCONS_00035285	2B	189405142	189405291
1834	TCONS_00035310	2B	190243744	190244903
1835	TCONS_00043531	2B	190632880	190634058
1836	TCONS_00035367	2B	195110842	195111380
1837	TCONS_00040865	2B	195113698	195116706
1838	TCONS_00035420	2B	196216852	196217179
1839	TCONS_00040913	2B	200531864	200532657
1840	TCONS_00040944	2B	203578882	203579645
1841	TCONS_00035611	2B	210877425	210879099
1842	TCONS_00035636	2B	211207140	211207712
1843	TCONS_00035718	2B	216252133	216252269
1844	TCONS_00041318	2B	229669578	229671246
1845	TCONS_00035985	2B	240971714	240972342
1846	TCONS_00036015	2B	241141252	241141770
1847	TCONS_00041445	2B	241304370	241304691
1848	TCONS_00036104	2B	246858432	246858663
1849	TCONS_00041555	2B	249197585	249198070
1850	TCONS_00041588	2B	251056215	251059345
1851	TCONS_00036175	2B	251073497	251074047
1852	TCONS_00043618	2B	251440139	251440801
1853	TCONS_00036281	2B	260603261	260603423
1854	TCONS_00036296	2B	262004970	262005424
1855	TCONS_00041747	2B	263603140	263603320
1856	TCONS_00043650	2B	267007360	267008807
1857	TCONS_00041847	2B	269203153	269203772
1858	TCONS_00041878	2B	270724811	270725962
1859	TCONS_00036484	2B	271761998	271762728
1860	TCONS_00041911	2B	273117167	273117440
1861	TCONS_00036530	2B	273682141	273683926
1862	TCONS_00041997	2B	279004552	279004740
1863	TCONS_00042033	2B	280456359	280456485
1864	TCONS_00036618	2B	282540954	282541363
1865	TCONS_00036627	2B	282893399	282893637
1866	TCONS_00042082	2B	283673904	283674078
1867	TCONS_00042083	2B	283674070	283674078
1868	TCONS_00042116	2B	285457329	285457741
1869	TCONS_00042115	2B	285457329	285457741
1870	TCONS_00042142	2B	287909193	287909632
1871	TCONS_00042209	2B	291759253	291760104
1872	TCONS_00042302	2B	294202810	294203534
1873	TCONS_00036859	2B	294672533	294674219
1874	TCONS_00042316	2B	294672620	294673843
1875	TCONS_00036860	2B	294680958	294682964
1876	TCONS_00042355	2B	297042175	297042782
1877	TCONS_00036970	2B	300904368	300904818
1878	TCONS_00036994	2B	302519291	302519326
1879	TCONS_00043737	2B	302668802	302669600
1880	TCONS_00042459	2B	303124916	303125331
1881	TCONS_00037012	2B	303319612	303319760
1882	TCONS_00042494	2B	304106840	304109285
1883	TCONS_00042553	2B	307930695	307932396
1884	TCONS_00042550	2B	307930695	307932396
1885	TCONS_00043759	2B	310304360	310305199
1886	TCONS_00042600	2B	312137469	312137874
1887	TCONS_00042620	2B	313036989	313038240
1888	TCONS_00037191	2B	315532499	315532803
1889	TCONS_00042690	2B	317446035	317451464
1890	TCONS_00037285	2B	324140031	324142627
1891	TCONS_00042810	2B	326033396	326034196
1892	TCONS_00042859	2B	329242149	329242650
1893	TCONS_00043815	2B	329835980	329836605
1894	TCONS_00037475	2B	331688513	331689456
1895	TCONS_00042920	2B	331711938	331712460
1896	TCONS_00037495	2B	333221992	333222887
1897	TCONS_00042954	2B	333847796	333848345
1898	TCONS_00037505	2B	333892070	333893458
1899	TCONS_00037526	2B	335193194	335194170
1900	TCONS_00037596	2B	337867300	337867435
1901	TCONS_00043026	2B	338639909	338640542
1902	TCONS_00043027	2B	338639909	338640542
1903	TCONS_00037678	2B	341796776	341796893
1904	TCONS_00037710	2B	342370662	342371778
1905	TCONS_00037714	2B	342370811	342371778
1906	TCONS_00043869	2B	342436692	342438004
1907	TCONS_00043110	2B	342586887	342588665
1908	TCONS_00043118	2B	342824026	342824376
1909	TCONS_00043121	2B	342957865	342958777
1910	TCONS_00037756	2B	343996660	343997972
1911	TCONS_00037758	2B	344001530	344001876
1912	TCONS_00043157	2B	344513972	344514355
1913	TCONS_00043170	2B	345238699	345239913
1914	TCONS_00043168	2B	345238699	345239913
200	TR210695_c3_g1_i1	2D	2077632	2078345	0
201	TR211589_c1_g1_i5	2D	3650368	3654567	0
202	TR211589_c1_g1_i6	2D	3650368	3654567	0
203	TR222404_c2_g1_i1	2D	3688296	3689811	0
204	TR189610_c1_g1_i4	2D	3976746	3979628	0
205	TR213891_c0_g1_i3	2D	5405759	5407857	0
206	TR223066_c0_g3_i2	2D	6983098	6984668	0
207	TR146697_c0_g2_i2	2D	7454835	7460634	0
208	TR229752_c0_g1_i1	2D	10898772	10901389	0
209	TR178771_c3_g3_i9	2D	17795121	17797175	0
210	TR178771_c3_g3_i10	2D	17802681	17805863	0
211	TR223090_c1_g1_i4	2D	22288339	22292281	0
212	TR238703_c0_g1_i1	2D	29181689	29184363	0
213	TR165329_c0_g1_i3	2D	40354997	40358715	0
214	TR181487_c3_g1_i5	2D	48957866	48960107	0
215	TR149674_c2_g5_i2	2D	51323979	51324989	0
216	TR202626_c0_g1_i1	2D	54060341	54064262	0
217	TR226191_c1_g1_i1	2D	54380954	54383517	0
218	TR222621_c0_g1_i7	2D	57689999	57692377	0
219	TR222621_c0_g1_i1	2D	57689999	57692377	0
220	TR147563_c0_g2_i2	2D	71772457	71773583	0
221	TR230149_c0_g1_i1	2D	81295628	81300017	0
222	TR230091_c1_g1_i1	2D	82356614	82357429	0
223	TR230076_c0_g1_i1	2D	86112216	86117823	0
224	TR216281_c0_g1_i2	2D	117533483	117537512	0
225	TR207746_c1_g1_i2	2D	124770512	124775847	0
226	TR189722_c0_g1_i1	2D	128540069	128542497	0
227	TR106292_c0_g1_i4	2D	131475870	131485139	0
228	TR208358_c0_g1_i1	2D	132442826	132448410	0
229	TR170919_c2_g1_i7	2D	134572376	134575886	0
230	TR231101_c2_g1_i1	2D	139923246	139927017	0
231	TR159494_c1_g1_i7	2D	141158252	141162377	0
232	TR234806_c0_g2_i3	2D	144010926	144012907	0
892	TR211589_c1_g1_i8	2D	3237704	3240579	1e-172
895	TR175753_c2_g3_i4	2D	138379976	138381933	9e-172
899	TR195478_c1_g1_i7	2D	28147510	28151776	3e-170
905	TR143219_c0_g2_i1	2D	76320745	76321676	3e-168
909	TR140775_c0_g2_i1	2D	141158252	141162377	4e-167
911	TR145148_c0_g2_i1	2D	11243132	11246221	3e-165
966	TR165032_c0_g2_i2	2D	90114079	90114592	5e-144
982	TR216912_c3_g4_i5	2D	14074703	14079919	4e-137
984	TR227161_c2_g3_i10	2D	54202831	54218384	6e-137
986	TR227161_c2_g3_i13	2D	54202831	54218384	2e-136
1004	TR221379_c1_g2_i1	2D	132127474	132131970	8e-129
1011	TR207405_c0_g1_i1	2D	21773299	21775588	2e-127
1029	TR219190_c0_g2_i1	2D	2457123	2461535	1e-122
1031	TR176794_c4_g1_i3	2D	140428555	140431280	2e-122
1036	TR220773_c1_g1_i1	2D	57580811	57584388	5e-120
1056	TR198937_c7_g2_i2	2D	19273259	19274724	3e-113
1203	TR176847_c0_g1_i1	2D	149404153	149404668	2e-67
1210	TR113886_c0_g2_i1	2D	20413116	20413940	2e-65
1220	TR225841_c1_g1_i1	2D	150247767	150251747	2e-60
1225	TR86211_c0_g1_i1	2D	4763846	4765200	7e-59
1915	TCONS_00043890	2D	343402	346279
1916	TCONS_00048175	2D	2510047	2510267
1917	TCONS_00048181	2D	2680651	2684739
1918	TCONS_00043980	2D	3430528	3430581
1919	TCONS_00043992	2D	3630565	3630667
1920	TCONS_00048271	2D	4972087	4973257
1921	TCONS_00048373	2D	8224475	8224881
1922	TCONS_00048377	2D	8424845	8425290
1923	TCONS_00048539	2D	13143689	13144073
1924	TCONS_00048543	2D	13236716	13237608
1925	TCONS_00044360	2D	13833548	13833672
1926	TCONS_00048608	2D	15155310	15155784
1927	TCONS_00048625	2D	15647501	15647815
1928	TCONS_00044431	2D	16121411	16122139
1929	TCONS_00044490	2D	17317993	17318370
1930	TCONS_00044496	2D	17504265	17504604
1931	TCONS_00044508	2D	17802681	17803288
1932	TCONS_00048709	2D	18236940	18237386
1933	TCONS_00052427	2D	18655773	18657135
1934	TCONS_00048757	2D	18686598	18687325
1935	TCONS_00044550	2D	19273259	19273551
1936	TCONS_00044566	2D	20244528	20244959
1937	TCONS_00048857	2D	21366537	21367064
1938	TCONS_00048865	2D	21392333	21392933
1939	TCONS_00048928	2D	23019587	23020164
1940	TCONS_00044793	2D	26669825	26670258
1941	TCONS_00049108	2D	26940644	26940716
1942	TCONS_00044845	2D	29181677	29182078
1943	TCONS_00044927	2D	32677069	32677908
1944	TCONS_00044945	2D	32845221	32845877
1945	TCONS_00044953	2D	32971261	32973309
1946	TCONS_00052496	2D	34233933	34234819
1947	TCONS_00049281	2D	34644250	34645330
1948	TCONS_00045053	2D	36096877	36097334
1949	TCONS_00049343	2D	36550105	36550535
1950	TCONS_00049474	2D	42095561	42096459
1951	TCONS_00049556	2D	44145509	44146298
1952	TCONS_00045233	2D	44777193	44777348
1953	TCONS_00045236	2D	44871390	44871456
1954	TCONS_00049631	2D	45865387	45865758
1955	TCONS_00045306	2D	46195624	46196148
1956	TCONS_00049674	2D	46651834	46652584
1957	TCONS_00049716	2D	46782354	46783313
1958	TCONS_00049767	2D	47786875	47790240
1959	TCONS_00049811	2D	50134585	50135142
1960	TCONS_00049920	2D	54042406	54043264
1961	TCONS_00045532	2D	54154802	54155467
1962	TCONS_00045621	2D	57651467	57651678
1963	TCONS_00045685	2D	59032441	59033251
1964	TCONS_00050072	2D	60961102	60961723
1965	TCONS_00050074	2D	61020901	61022753
1966	TCONS_00045753	2D	62922478	62923177
1967	TCONS_00045818	2D	67108403	67108604
1968	TCONS_00045827	2D	68150294	68150610
1969	TCONS_00050250	2D	74486637	74486988
1970	TCONS_00046022	2D	74634096	74634340
1971	TCONS_00046083	2D	75977385	75977781
1972	TCONS_00046084	2D	75977386	75977781
1973	TCONS_00052665	2D	79425773	79428010
1974	TCONS_00050373	2D	79467631	79467696
1975	TCONS_00046158	2D	79561172	79561359
1976	TCONS_00050408	2D	79646426	79648139
1977	TCONS_00046165	2D	79878774	79879365
1978	TCONS_00046225	2D	81446923	81447029
1979	TCONS_00050460	2D	81815939	81816926
1980	TCONS_00050479	2D	82319913	82320445
1981	TCONS_00050500	2D	82612753	82613717
1982	TCONS_00046329	2D	86108930	86109341
1983	TCONS_00046336	2D	86642633	86643338
1984	TCONS_00046428	2D	90198846	90199014
1985	TCONS_00046515	2D	93380449	93380535
1986	TCONS_00046516	2D	93384108	93384298
1987	TCONS_00046596	2D	95678168	95678867
1988	TCONS_00050855	2D	97008410	97008971
1989	TCONS_00050885	2D	97218486	97218826
1990	TCONS_00046712	2D	99278781	99279215
1991	TCONS_00050992	2D	103262227	103263671
1992	TCONS_00046790	2D	105479666	105480057
1993	TCONS_00046799	2D	106421965	106422355
1994	TCONS_00051188	2D	111118881	111118944
1995	TCONS_00051182	2D	111118881	111118944
1996	TCONS_00047080	2D	114593373	114593608
1997	TCONS_00051379	2D	115737682	115738265
1998	TCONS_00047124	2D	116268322	116268458
1999	TCONS_00051417	2D	117561514	117561590
2000	TCONS_00047155	2D	118557217	118557525
2001	TCONS_00051479	2D	119715562	119716523
2002	TCONS_00047231	2D	120080346	120080484
2003	TCONS_00051531	2D	120553066	120553554
2004	TCONS_00047294	2D	124255295	124255477
2005	TCONS_00051636	2D	125008377	125008694
2006	TCONS_00051641	2D	125064985	125066353
2007	TCONS_00047362	2D	127591028	127591070
2008	TCONS_00051702	2D	127967593	127967927
2009	TCONS_00052801	2D	130191947	130192601
2010	TCONS_00047450	2D	130508931	130510413
2011	TCONS_00051787	2D	130916687	130917321
2012	TCONS_00047477	2D	132127474	132127933
2013	TCONS_00047491	2D	132714545	132715259
2014	TCONS_00052820	2D	133143869	133145023
2015	TCONS_00051986	2D	136833019	136834097
2016	TCONS_00047716	2D	140519041	140521890
2017	TCONS_00047719	2D	140849616	140852599
2018	TCONS_00052101	2D	141158252	141159453
2019	TCONS_00052121	2D	142712390	142712620
2020	TCONS_00052134	2D	143057539	143058740
2021	TCONS_00047832	2D	145030198	145032299
2022	TCONS_00047881	2D	146332680	146333352
2023	TCONS_00047891	2D	146818803	146819304
2024	TCONS_00047912	2D	147514311	147514781
2025	TCONS_00048025	2D	149803836	149804350
233	TR13755_c0_g1_i1	3A	349087	351740	0
234	TR233411_c1_g1_i6	3A	1114113	1116251	0
235	TR164774_c0_g1_i6	3A	2243514	2248083	0
236	TR183427_c0_g1_i1	3A	3128089	3132875	0
237	TR166032_c0_g2_i4	3A	7100070	7102182	0
238	TR169987_c0_g1_i2	3A	11321313	11323615	0
239	TR178034_c1_g1_i7	3A	12880275	12882861	0
240	TR178034_c1_g1_i3	3A	12880275	12882861	0
241	TR127033_c0_g1_i1	3A	24600624	24603436	0
242	TR216049_c0_g1_i6	3A	66341888	66346615	0
243	TR225410_c0_g2_i1	3A	90460704	90466639	0
244	TR230899_c0_g1_i2	3A	91907761	91910345	0
245	TR211302_c0_g1_i3	3A	91934036	91935673	0
246	TR169238_c0_g1_i18	3A	94558357	94560228	0
247	TR168516_c0_g1_i2	3A	95161553	95162391	0
248	TR152529_c0_g1_i3	3A	122686497	122690416	0
249	TR237587_c0_g1_i10	3A	135722467	135724919	0
250	TR148336_c0_g1_i2	3A	154066527	154069515	0
251	TR197682_c2_g2_i1	3A	162751045	162752687	0
252	TR150011_c0_g2_i1	3A	162903176	162906293	0
253	TR183027_c5_g1_i1	3A	164569748	164572240	0
254	TR78417_c0_g1_i1	3A	168622373	168624252	0
255	TR78938_c0_g2_i3	3A	175738051	175739225	0
256	TR157608_c0_g1_i8	3A	179877050	179882761	0
257	TR169939_c0_g1_i1	3A	182331520	182335213	0
258	TR166758_c0_g1_i3	3A	183745373	183747072	0
872	TR203670_c0_g2_i2	3A	3078346	3078904	1e-178
881	TR170896_c0_g1_i2	3A	143515404	143516725	3e-175
919	TR220811_c2_g2_i2	3A	1409739	1410272	4e-162
923	TR237974_c8_g4_i18	3A	115181810	115187118	2e-160
951	TR179045_c0_g1_i5	3A	127754911	127755874	2e-148
953	TR190616_c1_g3_i3	3A	58858002	58859175	4e-148
973	TR214309_c1_g8_i9	3A	8301395	8306199	1e-140
997	TR226588_c1_g1_i1	3A	119755195	119758135	6e-132
1023	TR126015_c0_g1_i2	3A	94100405	94100658	8e-124
1057	TR102378_c0_g1_i2	3A	49827125	49827411	4e-113
1146	TR202300_c0_g1_i7	3A	151288143	151290339	9e-86
1147	TR202300_c0_g1_i2	3A	151288143	151290339	2e-85
2026	TCONS_00052918	3A	461254	463981
2027	TCONS_00052991	3A	2243514	2243741
2028	TCONS_00055673	3A	3128089	3128950
2029	TCONS_00055764	3A	6341383	6342228
2030	TCONS_00055774	3A	6852279	6853017
2031	TCONS_00055777	3A	6925159	6926022
2032	TCONS_00055789	3A	7576676	7577381
2033	TCONS_00055825	3A	8722688	8723784
2034	TCONS_00053200	3A	11426313	11426492
2035	TCONS_00055910	3A	11515961	11516293
2036	TCONS_00055912	3A	11560807	11561262
2037	TCONS_00055952	3A	12513774	12514382
2038	TCONS_00056042	3A	14861980	14862559
2039	TCONS_00056047	3A	14892608	14893078
2040	TCONS_00053424	3A	19096034	19097642
2041	TCONS_00053426	3A	19326297	19326442
2042	TCONS_00053479	3A	24560021	24560671
2043	TCONS_00053525	3A	26140013	26140734
2044	TCONS_00056209	3A	26547808	26553185
2045	TCONS_00056217	3A	26601312	26601886
2046	TCONS_00056252	3A	28601429	28602116
2047	TCONS_00056257	3A	29620883	29621303
2048	TCONS_00056319	3A	36629896	36630718
2049	TCONS_00056330	3A	36907907	36908562
2050	TCONS_00058452	3A	41723089	41724376
2051	TCONS_00058461	3A	45460614	45461356
2052	TCONS_00053819	3A	47895977	47896049
2053	TCONS_00053869	3A	49426863	49427439
2054	TCONS_00053870	3A	49436489	49437073
2055	TCONS_00056459	3A	58657186	58658095
2056	TCONS_00056484	3A	58936310	58937891
2057	TCONS_00058503	3A	60400296	60400988
2058	TCONS_00058505	3A	64020247	64021811
2059	TCONS_00056571	3A	69540394	69540951
2060	TCONS_00056619	3A	73383641	73384217
2061	TCONS_00056665	3A	80031674	80031934
2062	TCONS_00056706	3A	86589120	86591841
2063	TCONS_00054161	3A	95223591	95224945
2064	TCONS_00054249	3A	103556630	103556872
2065	TCONS_00054302	3A	107393377	107393478
2066	TCONS_00057025	3A	116096553	116100210
2067	TCONS_00057091	3A	122686231	122687548
2068	TCONS_00057092	3A	122686497	122687641
2069	TCONS_00054398	3A	123468174	123468318
2070	TCONS_00054441	3A	127783423	127783456
2071	TCONS_00054456	3A	128981949	128982679
2072	TCONS_00054496	3A	133092016	133092604
2073	TCONS_00054497	3A	133092085	133092604
2074	TCONS_00054519	3A	133683723	133685013
2075	TCONS_00057212	3A	135252579	135252937
2076	TCONS_00054545	3A	135579812	135579876
2077	TCONS_00054585	3A	138386111	138386278
2078	TCONS_00054635	3A	140396516	140398004
2079	TCONS_00054666	3A	142876225	142876245
2080	TCONS_00054688	3A	143558092	143558194
2081	TCONS_00057359	3A	144093540	144094433
2082	TCONS_00057419	3A	146255992	146256824
2083	TCONS_00054816	3A	148674055	148674576
2084	TCONS_00054828	3A	149537179	149537300
2085	TCONS_00057520	3A	151756228	151756429
2086	TCONS_00054892	3A	153533740	153537027
2087	TCONS_00057557	3A	153740748	153740902
2088	TCONS_00057579	3A	154062925	154063331
2089	TCONS_00054934	3A	154702209	154702674
2090	TCONS_00054951	3A	157175962	157176740
2091	TCONS_00058721	3A	159206974	159207860
2092	TCONS_00055055	3A	160616874	160617097
2093	TCONS_00057765	3A	160744352	160744696
2094	TCONS_00055107	3A	162539212	162539320
2095	TCONS_00055138	3A	163023413	163024654
2096	TCONS_00055167	3A	164107926	164108205
2097	TCONS_00057869	3A	165003310	165004912
2098	TCONS_00057936	3A	168847789	168848183
2099	TCONS_00055255	3A	169980565	169980769
2100	TCONS_00057959	3A	170196179	170196477
2101	TCONS_00055399	3A	176947467	176948325
2102	TCONS_00058837	3A	180962729	180963512
2103	TCONS_00058191	3A	182387295	182387690
2104	TCONS_00055508	3A	182569733	182569800
259	TR195875_c1_g4_i1	3B	955831	957996	0
260	TR237916_c1_g4_i10	3B	969001	970652	0
261	TR235861_c0_g1_i5	3B	2734638	2736232	0
262	TR172880_c0_g1_i3	3B	4735464	4735976	0
263	TR211277_c1_g1_i1	3B	9665023	9667709	0
264	TR184249_c2_g1_i3	3B	10774947	10776715	0
265	TR207701_c0_g1_i4	3B	14085964	14089036	0
266	TR210662_c1_g1_i1	3B	15716020	15718403	0
267	TR224456_c0_g6_i9	3B	16192204	16195157	0
268	TR226241_c1_g4_i6	3B	17692554	17699859	0
269	TR230275_c0_g1_i2	3B	22585865	22587747	0
270	TR202590_c2_g1_i8	3B	24942563	24944372	0
271	TR151135_c3_g3_i2	3B	29933155	29936161	0
272	TR154700_c1_g1_i2	3B	30388603	30390093	0
273	TR230130_c2_g1_i4	3B	34639740	34641480	0
274	TR197198_c1_g2_i1	3B	40269243	40275282	0
275	TR234918_c2_g2_i1	3B	48906038	48907093	0
276	TR189721_c0_g1_i1	3B	53885781	53887082	0
277	TR195187_c1_g1_i3	3B	57049863	57050645	0
278	TR174464_c0_g1_i1	3B	73356075	73359257	0
279	TR174900_c0_g1_i2	3B	87098174	87099604	0
280	TR229763_c0_g1_i2	3B	87699258	87701568	0
281	TR78201_c0_g1_i1	3B	88258669	88259454	0
282	TR171487_c1_g1_i1	3B	98701031	98701537	0
283	TR216277_c1_g1_i5	3B	99607627	99613047	0
284	TR172289_c1_g2_i6	3B	108634695	108636937	0
285	TR213366_c0_g1_i9	3B	108690438	108705064	0
286	TR202215_c1_g1_i9	3B	116119323	116122031	0
287	TR192443_c0_g1_i1	3B	120524258	120528780	0
288	TR226593_c1_g2_i3	3B	125772745	125775053	0
289	TR226593_c1_g2_i4	3B	125772745	125775053	0
290	TR192341_c2_g1_i1	3B	127039979	127042804	0
291	TR212150_c0_g2_i2	3B	127822603	127825796	0
292	TR216313_c0_g1_i1	3B	144130175	144131170	0
293	TR230865_c0_g1_i4	3B	146423519	146426767	0
294	TR216313_c2_g1_i6	3B	151273496	151274497	0
295	TR228003_c1_g1_i3	3B	161311497	161315424	0
296	TR188219_c0_g1_i7	3B	167967119	167968632	0
297	TR164728_c4_g1_i11	3B	172523921	172526076	0
298	TR189613_c1_g1_i1	3B	184341694	184342696	0
299	TR219560_c0_g1_i1	3B	185206152	185206538	0
300	TR206929_c1_g2_i1	3B	198820815	198823423	0
301	TR155825_c2_g1_i1	3B	203357622	203359502	0
302	TR154421_c0_g1_i1	3B	216213468	216221019	0
303	TR183429_c2_g4_i17	3B	221156582	221160742	0
304	TR183070_c0_g1_i1	3B	221233880	221237362	0
305	TR128540_c0_g1_i1	3B	231628594	231630018	0
306	TR174501_c1_g4_i1	3B	232687654	232689904	0
307	TR174501_c1_g4_i4	3B	232687654	232689904	0
308	TR196510_c2_g1_i4	3B	236063917	236067128	0
309	TR183717_c0_g2_i3	3B	259232670	259236297	0
310	TR156648_c3_g4_i6	3B	261649645	261650598	0
311	TR233791_c3_g2_i2	3B	265195577	265196834	0
312	TR196424_c0_g1_i3	3B	308374868	308376038	0
313	TR196424_c0_g1_i2	3B	308374868	308376038	0
314	TR182048_c2_g7_i1	3B	341730103	341738785	0
315	TR166592_c0_g1_i2	3B	344125510	344131661	0
316	TR164175_c0_g1_i1	3B	352093732	352095050	0
317	TR149707_c0_g1_i1	3B	364754438	364761293	0
318	TR207059_c0_g1_i4	3B	366413211	366414407	0
319	TR197022_c0_g2_i1	3B	377647164	377649444	0
320	TR211324_c2_g1_i1	3B	382595456	382600582	0
321	TR172009_c0_g2_i1	3B	388150118	388151042	0
322	TR233345_c1_g2_i5	3B	390400473	390418679	0
323	TR161171_c6_g1_i4	3B	391944197	391947570	0
324	TR238511_c1_g1_i3	3B	411814948	411817558	0
325	TR202037_c0_g1_i1	3B	414167525	414171407	0
326	TR105618_c0_g1_i1	3B	418188510	418188902	0
327	TR210497_c0_g1_i5	3B	422812709	422814632	0
328	TR216074_c0_g1_i3	3B	426588798	426598951	0
329	TR164233_c0_g2_i1	3B	429740552	429741865	0
330	TR214527_c0_g1_i3	3B	443207896	443208864	0
331	TR202346_c0_g1_i2	3B	444553027	444553557	0
332	TR195460_c0_g1_i1	3B	444566686	444569502	0
333	TR212166_c5_g1_i2	3B	452802187	452803479	0
334	TR212166_c5_g1_i4	3B	452828028	452829181	0
335	TR163531_c1_g1_i6	3B	453172920	453178268	0
336	TR215211_c0_g2_i4	3B	454849774	454854190	0
337	TR215211_c0_g1_i2	3B	454849774	454854190	0
338	TR215211_c0_g2_i2	3B	454849774	454854190	0
339	TR176402_c3_g1_i14	3B	457957353	457957874	0
340	TR166457_c0_g1_i3	3B	459193171	459194598	0
341	TR166457_c0_g1_i7	3B	459193171	459194598	0
342	TR175737_c0_g1_i1	3B	464905384	464906100	0
343	TR221882_c0_g1_i1	3B	466765184	466771681	0
344	TR188199_c0_g1_i4	3B	475877013	475877785	0
345	TR149667_c3_g2_i3	3B	476994952	476996162	0
346	TR149667_c3_g2_i4	3B	476994952	476996162	0
347	TR172241_c0_g1_i1	3B	485416071	485417452	0
348	TR226665_c1_g3_i6	3B	485806159	485812458	0
349	TR181125_c2_g1_i6	3B	487038359	487042364	0
350	TR154827_c3_g1_i5	3B	493879666	493881210	0
351	TR237586_c0_g1_i2	3B	494521070	494523965	0
352	TR149659_c0_g1_i3	3B	499422345	499427415	0
353	TR149659_c0_g1_i2	3B	499422345	499427415	0
354	TR152472_c0_g1_i1	3B	507155916	507159650	0
355	TR159573_c0_g1_i1	3B	507768972	507770336	0
356	TR237944_c0_g1_i3	3B	511084255	511086874	0
357	TR238593_c1_g1_i1	3B	517070600	517074041	0
358	TR77574_c1_g1_i1	3B	521124741	521127707	0
359	TR211590_c0_g1_i4	3B	530083125	530084414	0
360	TR212905_c0_g1_i1	3B	531006420	531007205	0
361	TR175483_c0_g1_i1	3B	533921982	533925864	0
362	TR223096_c0_g1_i1	3B	534914355	534917176	0
363	TR105338_c0_g4_i1	3B	535941057	535943773	0
364	TR216110_c0_g1_i2	3B	553965685	553968411	0
365	TR214250_c0_g1_i3	3B	556234981	556236609	0
366	TR202243_c1_g1_i2	3B	573077558	573081024	0
367	TR176084_c0_g1_i8	3B	575051131	575051751	0
368	TR154983_c2_g1_i2	3B	579438467	579439482	0
369	TR154983_c2_g1_i1	3B	579438467	579439482	0
370	TR225406_c0_g1_i1	3B	580156045	580157397	0
371	TR189924_c0_g2_i1	3B	580835250	580840046	0
372	TR189924_c0_g2_i2	3B	580835250	580840046	0
373	TR178138_c5_g1_i2	3B	581039393	581042149	0
374	TR182447_c1_g1_i4	3B	583790173	583791298	0
375	TR130194_c0_g2_i1	3B	589293456	589294839	0
376	TR181044_c3_g2_i1	3B	591988778	591991670	0
377	TR184239_c3_g3_i1	3B	592639792	592646062	0
378	TR183710_c3_g1_i7	3B	601367633	601369466	0
379	TR182000_c2_g1_i2	3B	603775459	603775965	0
380	TR226236_c1_g1_i1	3B	609517341	609518804	0
381	TR226236_c1_g1_i3	3B	609517341	609518804	0
382	TR176791_c1_g1_i2	3B	625458971	625460224	0
383	TR211156_c0_g2_i2	3B	626348841	626349284	0
384	TR211156_c0_g2_i4	3B	626348841	626349284	0
385	TR234925_c2_g3_i2	3B	627284101	627285247	0
386	TR180426_c0_g1_i1	3B	633156855	633157919	0
387	TR155546_c0_g1_i1	3B	634122153	634123870	0
388	TR155546_c0_g1_i5	3B	634122153	634123870	0
389	TR148988_c1_g1_i1	3B	640780579	640784257	0
390	TR228049_c1_g2_i3	3B	646140726	646141345	0
391	TR228049_c1_g3_i8	3B	646176203	646177881	0
392	TR204414_c0_g1_i2	3B	647352917	647356580	0
393	TR151232_c0_g1_i1	3B	648772641	648774768	0
394	TR92252_c0_g1_i1	3B	652794392	652798150	0
395	TR214470_c0_g1_i4	3B	659435105	659437362	0
396	TR238528_c1_g3_i2	3B	667458870	667460247	0
397	TR238528_c1_g3_i3	3B	667458870	667460247	0
398	TR87277_c0_g1_i1	3B	694451235	694452671	0
399	TR177634_c1_g1_i12	3B	697311653	697312627	0
400	TR238650_c3_g2_i1	3B	697349368	697350438	0
401	TR238650_c4_g1_i7	3B	697349368	697350438	0
402	TR176295_c1_g1_i2	3B	698397239	698408385	0
403	TR233195_c0_g2_i1	3B	707316034	707317965	0
404	TR215678_c5_g1_i1	3B	709128500	709129701	0
405	TR120254_c0_g1_i1	3B	714444317	714445843	0
406	TR156432_c0_g1_i1	3B	715339843	715349217	0
407	TR78938_c0_g1_i1	3B	730409211	730410567	0
408	TR184152_c3_g1_i7	3B	741287095	741289563	0
409	TR202849_c3_g1_i1	3B	750744238	750744651	0
410	TR149716_c1_g1_i3	3B	758584533	758585714	0
411	TR151265_c2_g1_i3	3B	770307194	770309544	0
412	TR143071_c0_g1_i2	3B	770462590	770464599	0
869	TR238650_c3_g1_i2	3B	697349368	697350438	1e-180
878	TR196227_c0_g1_i3	3B	629542747	629543175	3e-177
879	TR196227_c0_g1_i5	3B	629542747	629543175	3e-177
883	TR237916_c1_g4_i5	3B	969001	970652	6e-175
893	TR187042_c1_g1_i1	3B	407621365	407621919	4e-172
897	TR172880_c0_g1_i5	3B	4735464	4735976	1e-170
908	TR225420_c1_g1_i3	3B	402396820	402398982	1e-167
910	TR210930_c1_g1_i5	3B	157628609	157634668	5e-167
914	TR212842_c0_g1_i4	3B	166669849	166670514	2e-164
917	TR175462_c1_g1_i6	3B	2529421	2530282	1e-163
922	TR166070_c0_g1_i2	3B	581039393	581042149	5e-161
924	TR214527_c0_g1_i1	3B	443207896	443208864	3e-160
928	TR206989_c2_g1_i1	3B	103414533	103415072	3e-158
929	TR152215_c0_g1_i1	3B	532956339	532958239	2e-157
932	TR184428_c0_g1_i19	3B	746042932	746046166	8e-156
941	TR208391_c0_g1_i1	3B	180659605	180659898	7e-152
949	TR79941_c1_g1_i1	3B	234446702	234446989	1e-148
957	TR79941_c1_g1_i2	3B	234446702	234446989	5e-147
961	TR175462_c1_g1_i3	3B	2529421	2530282	2e-144
962	TR207208_c1_g1_i1	3B	14090778	14093501	2e-144
963	TR221148_c1_g1_i3	3B	487560974	487569074	3e-144
964	TR162105_c0_g1_i1	3B	667649537	667649872	3e-144
970	TR232576_c0_g1_i6	3B	527199726	527200176	2e-142
979	TR216985_c0_g1_i1	3B	651737487	651737840	6e-139
992	TR96721_c0_g1_i1	3B	40255613	40257126	8e-135
994	TR169698_c0_g1_i2	3B	259267937	259269722	1e-133
999	TR225887_c4_g1_i7	3B	232670745	232677564	2e-130
1001	TR223397_c1_g1_i1	3B	15716020	15718403	3e-130
1010	TR170707_c6_g2_i1	3B	211957156	211958136	4e-128
1018	TR213900_c0_g1_i3	3B	555966958	555967296	3e-125
1025	TR200634_c0_g1_i4	3B	430443769	430444017	1e-123
1046	TR211580_c1_g1_i3	3B	651229472	651231598	2e-116
1047	TR115876_c0_g2_i1	3B	68428544	68430536	4e-116
1064	TR207692_c2_g4_i1	3B	552023922	552025118	8e-111
1066	TR238515_c2_g3_i1	3B	416733576	416734759	3e-109
1071	TR150393_c0_g2_i4	3B	773537666	773542133	3e-106
1075	TR234925_c2_g3_i4	3B	627284101	627285247	4e-105
1076	TR208977_c0_g1_i7	3B	714121211	714124735	1e-104
1077	TR235881_c1_g1_i1	3B	395854886	395855152	2e-104
1080	TR237916_c1_g1_i1	3B	969001	970652	1e-103
1081	TR172611_c1_g1_i5	3B	590240593	590241942	1e-103
1088	TR3062_c0_g1_i1	3B	463259138	463266932	4e-102
1090	TR216250_c1_g3_i4	3B	618844273	618845806	5e-102
1093	TR214525_c0_g1_i5	3B	5643815	5644382	3e-101
1094	TR224191_c2_g2_i1	3B	24942563	24944372	5e-101
1097	TR228049_c1_g3_i11	3B	646112866	646114689	1e-99
1108	TR159166_c0_g2_i6	3B	736567613	736568422	5e-96
1114	TR180424_c1_g1_i4	3B	762150925	762152653	1e-94
1117	TR207782_c2_g1_i3	3B	627072592	627073434	3e-94
1118	TR192255_c4_g2_i2	3B	89304138	89304922	7e-94
1132	TR237916_c1_g4_i3	3B	969001	970652	5e-90
1140	TR155758_c0_g1_i13	3B	24030208	24031629	1e-86
1141	TR123485_c0_g1_i2	3B	530453676	530453984	1e-86
1153	TR118824_c0_g1_i1	3B	119324960	119325127	8e-82
1155	TR85520_c0_g2_i1	3B	549317356	549321297	5e-81
1158	TR74281_c0_g1_i1	3B	526107455	526108189	1e-80
1169	TR226665_c1_g4_i3	3B	485806159	485812458	3e-77
1173	TR131013_c0_g1_i1	3B	608402732	608403569	3e-76
1179	TR205583_c3_g2_i8	3B	727325026	727325181	6e-75
1184	TR205583_c3_g2_i1	3B	728138363	728138578	2e-73
1190	TR184152_c3_g3_i1	3B	741287095	741289563	6e-71
1193	TR193801_c0_g1_i3	3B	384821607	384822293	4e-70
1214	TR155480_c0_g1_i4	3B	609906901	609908360	5e-64
1221	TR193861_c0_g1_i5	3B	594100662	594100805	2e-60
1230	TR154947_c0_g1_i4	3B	742317853	742319007	3e-58
1233	TR181827_c1_g3_i1	3B	562201585	562202652	3e-57
1234	TR82949_c0_g1_i2	3B	65103201	65112222	6e-57
1239	TR214555_c0_g2_i1	3B	760644225	760655054	4e-55
1245	TR202341_c1_g5_i1	3B	587344733	587346685	2e-51
2105	TCONS_00058868	3B	644616	644834
2106	TCONS_00058891	3B	968873	969093
2107	TCONS_00058901	3B	1097733	1097834
2108	TCONS_00058938	3B	2297664	2298350
2109	TCONS_00069376	3B	2720488	2720914
2110	TCONS_00069411	3B	4095378	4096293
2111	TCONS_00078809	3B	7556960	7558638
2112	TCONS_00069516	3B	9230394	9230549
2113	TCONS_00059104	3B	9233397	9235437
2114	TCONS_00078816	3B	11068852	11069730
2115	TCONS_00069591	3B	11070491	11071424
2116	TCONS_00059189	3B	12085261	12085294
2117	TCONS_00069618	3B	12115452	12116048
2118	TCONS_00069621	3B	12115452	12116048
2119	TCONS_00069706	3B	14839182	14839531
2120	TCONS_00069753	3B	17277193	17277700
2121	TCONS_00069760	3B	17317775	17319724
2122	TCONS_00059299	3B	17402427	17403248
2123	TCONS_00059308	3B	17712401	17712762
2124	TCONS_00069851	3B	21371948	21373260
2125	TCONS_00069894	3B	24667764	24668292
2126	TCONS_00069895	3B	24764689	24765057
2127	TCONS_00059407	3B	24942563	24942799
2128	TCONS_00069908	3B	25540516	25541058
2129	TCONS_00059436	3B	25677813	25678129
2130	TCONS_00059626	3B	36589409	36591478
2131	TCONS_00078848	3B	38174693	38175790
2132	TCONS_00078849	3B	38175882	38177253
2133	TCONS_00070137	3B	39037269	39039128
2134	TCONS_00059687	3B	40269231	40269601
2135	TCONS_00059755	3B	41050450	41050648
2136	TCONS_00059997	3B	56954356	56956385
2137	TCONS_00060042	3B	58499661	58499942
2138	TCONS_00060044	3B	58499703	58499942
2139	TCONS_00078878	3B	62052184	62052982
2140	TCONS_00078881	3B	62587519	62590217
2141	TCONS_00070592	3B	63409006	63411492
2142	TCONS_00060121	3B	64414213	64414287
2143	TCONS_00060129	3B	65099091	65099224
2144	TCONS_00060193	3B	66116444	66118372
2145	TCONS_00078887	3B	69382821	69383678
2146	TCONS_00060265	3B	70434592	70435679
2147	TCONS_00060278	3B	71084597	71084865
2148	TCONS_00070708	3B	71333431	71334330
2149	TCONS_00070806	3B	76906998	76908931
2150	TCONS_00060441	3B	80969564	80970307
2151	TCONS_00060468	3B	82541793	82542343
2152	TCONS_00060587	3B	87699206	87699483
2153	TCONS_00070975	3B	89912348	89913398
2154	TCONS_00071059	3B	94947366	94947810
2155	TCONS_00071129	3B	103542046	103542305
2156	TCONS_00078933	3B	110030195	110031269
2157	TCONS_00061057	3B	125770086	125770391
2158	TCONS_00071397	3B	126538719	126539670
2159	TCONS_00071478	3B	134748887	134749983
2160	TCONS_00071609	3B	144130175	144131170
2161	TCONS_00078967	3B	144138856	144140055
2162	TCONS_00078968	3B	144651423	144652352
2163	TCONS_00061310	3B	146427039	146427813
2164	TCONS_00061388	3B	151273454	151273666
2165	TCONS_00071787	3B	153183820	153185957
2166	TCONS_00061426	3B	154966568	154967070
2167	TCONS_00061470	3B	160948407	160948677
2168	TCONS_00071890	3B	165302438	165302842
2169	TCONS_00061562	3B	166669504	166670217
2170	TCONS_00078990	3B	167681646	167683250
2171	TCONS_00078993	3B	172443502	172444867
2172	TCONS_00061733	3B	181488407	181488794
2173	TCONS_00061753	3B	181529065	181529245
2174	TCONS_00061772	3B	184224141	184224199
2175	TCONS_00072125	3B	184495716	184496478
2176	TCONS_00079014	3B	184966243	184967375
2177	TCONS_00061841	3B	192114244	192116641
2178	TCONS_00061915	3B	200801315	200803410
2179	TCONS_00062069	3B	216789819	216790006
2180	TCONS_00062114	3B	221233324	221233999
2181	TCONS_00062253	3B	234799281	234799488
2182	TCONS_00062289	3B	236337245	236337685
2183	TCONS_00062321	3B	240421783	240422317
2184	TCONS_00072577	3B	241386128	241403543
2185	TCONS_00062346	3B	242994744	242994898
2186	TCONS_00062456	3B	258753608	258754144
2187	TCONS_00072796	3B	259232336	259232735
2188	TCONS_00072826	3B	262454184	262454942
2189	TCONS_00062620	3B	265868559	265868837
2190	TCONS_00079116	3B	269791208	269792485
2191	TCONS_00062933	3B	296208806	296209494
2192	TCONS_00072962	3B	297664367	297664749
2193	TCONS_00073010	3B	306006947	306008756
2194	TCONS_00079175	3B	314245642	314246905
2195	TCONS_00063268	3B	336325123	336325478
2196	TCONS_00063301	3B	341730103	341730367
2197	TCONS_00073457	3B	364811999	364819445
2198	TCONS_00073585	3B	377424680	377426748
2199	TCONS_00063689	3B	384572131	384573025
2200	TCONS_00063712	3B	386570892	386571196
2201	TCONS_00063751	3B	391688794	391689639
2202	TCONS_00079245	3B	392367078	392368272
2203	TCONS_00063765	3B	393071848	393072758
2204	TCONS_00073977	3B	413873915	413874277
2205	TCONS_00073980	3B	414167040	414167693
2206	TCONS_00064027	3B	416648644	416651050
2207	TCONS_00064079	3B	421983327	421983618
2208	TCONS_00074073	3B	422096508	422097023
2209	TCONS_00079287	3B	429955417	429956472
2210	TCONS_00064282	3B	432589433	432589548
2211	TCONS_00074255	3B	444566380	444566802
2212	TCONS_00064478	3B	452802187	452803479
2213	TCONS_00064479	3B	452828028	452828690
2214	TCONS_00074356	3B	453020003	453020513
2215	TCONS_00064511	3B	453123830	453124552
2216	TCONS_00074389	3B	453125697	453126136
2217	TCONS_00074374	3B	453125697	453126136
2218	TCONS_00074402	3B	455662173	455662710
2219	TCONS_00064561	3B	456558776	456559026
2220	TCONS_00064569	3B	457439121	457440050
2221	TCONS_00064589	3B	458126021	458126281
2222	TCONS_00064590	3B	458126433	458127231
2223	TCONS_00074452	3B	459192128	459195365
2224	TCONS_00064618	3B	459806357	459809302
2225	TCONS_00064636	3B	460018301	460018591
2226	TCONS_00064646	3B	460470586	460471053
2227	TCONS_00074480	3B	462104082	462104422
2228	TCONS_00074537	3B	466726928	466728361
2229	TCONS_00074597	3B	471367918	471368283
2230	TCONS_00064792	3B	472118160	472118478
2231	TCONS_00074641	3B	476804263	476805564
2232	TCONS_00074640	3B	476804263	476805564
2233	TCONS_00074642	3B	476805105	476810328
2234	TCONS_00074665	3B	478270214	478270853
2235	TCONS_00074694	3B	479993679	479993774
2236	TCONS_00064938	3B	488690817	488691877
2237	TCONS_00065019	3B	493879666	493881210
2238	TCONS_00074835	3B	495261251	495262133
2239	TCONS_00065074	3B	500012147	500014785
2240	TCONS_00074888	3B	502443580	502444879
2241	TCONS_00074908	3B	504050924	504051142
2242	TCONS_00074931	3B	505334517	505335420
2243	TCONS_00065159	3B	505344949	505345305
2244	TCONS_00065236	3B	510113966	510114132
2245	TCONS_00075175	3B	526107455	526108189
2246	TCONS_00075239	3B	529347009	529347390
2247	TCONS_00065511	3B	534913937	534914993
2248	TCONS_00065523	3B	535720724	535720798
2249	TCONS_00065548	3B	536305353	536305604
2250	TCONS_00065655	3B	546312725	546313249
2251	TCONS_00075534	3B	549317134	549317551
2252	TCONS_00065705	3B	549563933	549564341
2253	TCONS_00075543	3B	550256791	550256954
2254	TCONS_00065767	3B	555759684	555760045
2255	TCONS_00065772	3B	556001408	556001569
2256	TCONS_00079413	3B	560133535	560136683
2257	TCONS_00075636	3B	561153821	561153942
2258	TCONS_00065862	3B	562580904	562581203
2259	TCONS_00065876	3B	563026495	563027172
2260	TCONS_00079417	3B	563594830	563596351
2261	TCONS_00065971	3B	568248371	568250108
2262	TCONS_00079424	3B	572413377	572414395
2263	TCONS_00075790	3B	575023999	575024416
2264	TCONS_00066092	3B	576077621	576077931
2265	TCONS_00066123	3B	579432331	579432826
2266	TCONS_00066125	3B	580034537	580034606
2267	TCONS_00066127	3B	580155305	580155756
2268	TCONS_00075887	3B	581039194	581039650
2269	TCONS_00075889	3B	581039393	581039650
2270	TCONS_00075982	3B	586997852	586998101
2271	TCONS_00066171	3B	587880509	587880745
2272	TCONS_00075997	3B	587904549	587904887
2273	TCONS_00079440	3B	589030402	589033109
2274	TCONS_00066177	3B	590240289	590240796
2275	TCONS_00066202	3B	591988733	591989098
2276	TCONS_00066221	3B	592966742	592967222
2277	TCONS_00066334	3B	599433811	599434062
2278	TCONS_00076147	3B	604474664	604482474
2279	TCONS_00076182	3B	608414787	608416683
2280	TCONS_00076197	3B	610568666	610569135
2281	TCONS_00079469	3B	613146123	613147859
2282	TCONS_00076254	3B	615096919	615097360
2283	TCONS_00076273	3B	616395812	616397173
2284	TCONS_00066563	3B	620254076	620254637
2285	TCONS_00076332	3B	622299963	622300728
2286	TCONS_00066810	3B	631383553	631384021
2287	TCONS_00066811	3B	631383576	631384021
2288	TCONS_00076472	3B	631824995	631825768
2289	TCONS_00066949	3B	639804962	639805704
2290	TCONS_00079504	3B	640866700	640868393
2291	TCONS_00076588	3B	642436515	642436633
2292	TCONS_00076599	3B	643663235	643663533
2293	TCONS_00076600	3B	643663287	643663412
2294	TCONS_00076609	3B	644399756	644404001
2295	TCONS_00067028	3B	644501317	644511622
2296	TCONS_00067057	3B	646112584	646113197
2297	TCONS_00067060	3B	646112866	646113289
2298	TCONS_00076626	3B	646631979	646632436
2299	TCONS_00079512	3B	648301147	648301592
2300	TCONS_00076743	3B	652230739	652232510
2301	TCONS_00076756	3B	652794024	652794445
2302	TCONS_00076755	3B	652794024	652794445
2303	TCONS_00076772	3B	653252925	653253256
2304	TCONS_00076774	3B	653253133	653253256
2305	TCONS_00067190	3B	655296449	655296705
2306	TCONS_00067510	3B	676583857	676586343
2307	TCONS_00077143	3B	679184542	679186840
2308	TCONS_00077151	3B	679796286	679796442
2309	TCONS_00067573	3B	680186378	680186394
2310	TCONS_00067586	3B	680664448	680664636
2311	TCONS_00067584	3B	680664448	680664636
2312	TCONS_00077234	3B	689290444	689290771
2313	TCONS_00067705	3B	691578846	691579550
2314	TCONS_00067803	3B	698397098	698397364
2315	TCONS_00067837	3B	701144898	701145344
2316	TCONS_00067919	3B	705751953	705755227
2317	TCONS_00077474	3B	705752776	705752976
2318	TCONS_00067921	3B	705754539	705755227
2319	TCONS_00077761	3B	727323924	727324324
2320	TCONS_00077797	3B	728624666	728625775
2321	TCONS_00068327	3B	734970539	734970833
2322	TCONS_00068370	3B	737056634	737056767
2323	TCONS_00078094	3B	741286691	741287446
2324	TCONS_00078093	3B	741286691	741287446
2325	TCONS_00068442	3B	741915696	741916162
2326	TCONS_00079634	3B	741993487	741994160
2327	TCONS_00079635	3B	741998610	741999493
2328	TCONS_00078210	3B	747855257	747855709
2329	TCONS_00078230	3B	749461214	749461709
2330	TCONS_00078226	3B	749461214	749461709
2331	TCONS_00068601	3B	749998842	749999011
2332	TCONS_00068670	3B	751060495	751060942
2333	TCONS_00078349	3B	759060443	759060886
2334	TCONS_00068937	3B	761016461	761016644
2335	TCONS_00078602	3B	768884043	768884669
2336	TCONS_00078666	3B	770213507	770213974
2337	TCONS_00078677	3B	770579648	770580144
2338	TCONS_00069265	3B	773026711	773028552
413	TR171515_c1_g1_i2	3D	35160073	35163729	0
414	TR233739_c0_g1_i1	3D	54318948	54322393	0
415	TR181852_c1_g3_i7	3D	59402745	59409309	0
416	TR181852_c1_g3_i4	3D	59402745	59409309	0
417	TR149265_c0_g5_i1	3D	62485333	62490684	0
418	TR149189_c0_g1_i5	3D	90428706	90429460	0
419	TR186114_c0_g1_i1	3D	102679017	102681490	0
420	TR192301_c0_g1_i6	3D	104848230	104856420	0
421	TR226634_c0_g2_i2	3D	106155035	106157719	0
422	TR237681_c0_g3_i3	3D	121670909	121672267	0
423	TR156640_c2_g1_i3	3D	122454302	122457470	0
912	TR168431_c0_g1_i1	3D	122035220	122036181	3e-165
952	TR104805_c0_g1_i1	3D	118587794	118588757	3e-148
1039	TR181568_c2_g1_i1	3D	113648668	113649336	3e-118
1101	TR78638_c0_g2_i1	3D	112525188	112526272	4e-99
1107	TR148972_c2_g1_i14	3D	21932263	21934388	1e-96
1181	TR181568_c2_g1_i3	3D	113648668	113649336	5e-74
2339	TCONS_00082531	3D	100537	101119
2340	TCONS_00079707	3D	221415	224996
2341	TCONS_00085612	3D	380680	381295
2342	TCONS_00079715	3D	511467	511549
2343	TCONS_00079733	3D	821975	822349
2344	TCONS_00082564	3D	1058404	1059796
2345	TCONS_00079752	3D	1128359	1129118
2346	TCONS_00079754	3D	1168075	1168229
2347	TCONS_00079802	3D	2795207	2795270
2348	TCONS_00082630	3D	3372264	3372751
2349	TCONS_00082645	3D	3859395	3859680
2350	TCONS_00079909	3D	5808384	5808508
2351	TCONS_00082734	3D	6189209	6190551
2352	TCONS_00080024	3D	8891261	8891287
2353	TCONS_00080102	3D	10528467	10528865
2354	TCONS_00080114	3D	10529864	10529939
2355	TCONS_00082934	3D	14489312	14489791
2356	TCONS_00082999	3D	17585546	17585967
2357	TCONS_00080275	3D	18211174	18211272
2358	TCONS_00083047	3D	20175569	20175862
2359	TCONS_00080369	3D	20608304	20609127
2360	TCONS_00080394	3D	22437419	22437503
2361	TCONS_00083078	3D	22567106	22569318
2362	TCONS_00083091	3D	23173369	23173801
2363	TCONS_00080438	3D	25133129	25133248
2364	TCONS_00080452	3D	26839877	26839990
2365	TCONS_00083323	3D	31780759	31781627
2366	TCONS_00083388	3D	33549844	33549919
2367	TCONS_00085824	3D	35075521	35076265
2368	TCONS_00085829	3D	36510103	36511726
2369	TCONS_00080756	3D	39514999	39516352
2370	TCONS_00083569	3D	42252417	42253629
2371	TCONS_00080848	3D	43328018	43328866
2372	TCONS_00083621	3D	43471400	43471951
2373	TCONS_00080871	3D	43894031	43894543
2374	TCONS_00083680	3D	45822871	45823745
2375	TCONS_00083685	3D	45845848	45846270
2376	TCONS_00083824	3D	51468966	51468997
2377	TCONS_00080974	3D	51723655	51723715
2378	TCONS_00081088	3D	57273631	57273923
2379	TCONS_00083954	3D	58608708	58609311
2380	TCONS_00083993	3D	59402745	59403927
2381	TCONS_00085903	3D	59432397	59433195
2382	TCONS_00085912	3D	60685734	60686740
2383	TCONS_00085918	3D	61336146	61336934
2384	TCONS_00081163	3D	62063668	62064795
2385	TCONS_00084039	3D	62485267	62485839
2386	TCONS_00084079	3D	65279526	65279837
2387	TCONS_00085934	3D	65659497	65661648
2388	TCONS_00081223	3D	65806147	65806298
2389	TCONS_00084114	3D	66143514	66144263
2390	TCONS_00084115	3D	66143690	66144646
2391	TCONS_00081282	3D	68031960	68032030
2392	TCONS_00084272	3D	72573845	72575153
2393	TCONS_00084280	3D	72697186	72697615
2394	TCONS_00084312	3D	74219839	74220452
2395	TCONS_00084333	3D	74530432	74530803
2396	TCONS_00084337	3D	75025141	75025432
2397	TCONS_00084379	3D	77579570	77579701
2398	TCONS_00084382	3D	77697964	77698679
2399	TCONS_00081419	3D	79961971	79963281
2400	TCONS_00081435	3D	81853962	81854371
2401	TCONS_00086001	3D	85671274	85671658
2402	TCONS_00086010	3D	87263560	87263972
2403	TCONS_00081512	3D	88447345	88447374
2404	TCONS_00084542	3D	88611765	88612007
2405	TCONS_00081572	3D	89689770	89689963
2406	TCONS_00084631	3D	90560101	90560513
2407	TCONS_00081606	3D	90646615	90647698
2408	TCONS_00081682	3D	92448550	92448733
2409	TCONS_00081705	3D	93352258	93352418
2410	TCONS_00081707	3D	93415096	93415179
2411	TCONS_00081764	3D	95814803	95816762
2412	TCONS_00081808	3D	97315615	97316261
2413	TCONS_00084763	3D	97317107	97317432
2414	TCONS_00081825	3D	97624397	97625358
2415	TCONS_00084807	3D	98242227	98242716
2416	TCONS_00084843	3D	99342699	99343364
2417	TCONS_00084890	3D	101104699	101105052
2418	TCONS_00084905	3D	101452894	101453270
2419	TCONS_00084945	3D	101818905	101819542
2420	TCONS_00085023	3D	104155957	104156157
2421	TCONS_00082116	3D	106357582	106357918
2422	TCONS_00085074	3D	106408468	106408655
2423	TCONS_00082130	3D	106523471	106523623
2424	TCONS_00082141	3D	106730092	106730120
2425	TCONS_00085124	3D	107541325	107541795
2426	TCONS_00086144	3D	108529762	108530574
2427	TCONS_00085147	3D	109288223	109288581
2428	TCONS_00085218	3D	111879674	111882327
2429	TCONS_00085255	3D	113056100	113057001
2430	TCONS_00082295	3D	115562018	115562063
2431	TCONS_00082322	3D	116586506	116587133
2432	TCONS_00086208	3D	116592182	116592532
2433	TCONS_00085376	3D	117737611	117738041
2434	TCONS_00085413	3D	118585187	118586385
2435	TCONS_00082396	3D	118587794	118588757
2436	TCONS_00086246	3D	121906788	121907746
2437	TCONS_00085536	3D	122408907	122412590
2438	TCONS_00085601	3D	124012659	124013137
2439	TCONS_00085607	3D	124314654	124315269
424	TR159101_c0_g1_i1	4A	1322334	1324030	0
425	TR217602_c1_g1_i1	4A	2883205	2887862	0
426	TR124775_c0_g3_i1	4A	3292397	3294599	0
427	TR119504_c0_g1_i1	4A	21140191	21143193	0
428	TR197307_c0_g1_i1	4A	25198075	25199726	0
429	TR222682_c0_g1_i1	4A	27314277	27316353	0
430	TR216754_c0_g1_i1	4A	29491441	29495137	0
431	TR233726_c0_g1_i1	4A	31059494	31062421	0
432	TR149074_c0_g2_i3	4A	36391412	36392692	0
433	TR190991_c0_g1_i1	4A	40674012	40678786	0
434	TR219452_c0_g1_i2	4A	43707483	43715003	0
435	TR219452_c0_g1_i1	4A	43707483	43715003	0
436	TR172605_c0_g1_i1	4A	44342828	44346007	0
437	TR166615_c0_g1_i4	4A	57358789	57360397	0
438	TR226621_c0_g1_i10	4A	57949614	57952774	0
439	TR216876_c0_g1_i4	4A	60856772	60858955	0
440	TR238666_c0_g2_i4	4A	61732875	61733883	0
441	TR238666_c0_g2_i5	4A	61734311	61735901	0
442	TR192345_c0_g1_i3	4A	64631203	64634521	0
443	TR149985_c2_g2_i2	4A	65701686	65703664	0
444	TR215171_c0_g2_i2	4A	67264665	67267875	0
445	TR171936_c0_g1_i1	4A	81039076	81043065	0
446	TR154733_c1_g1_i1	4A	86643103	86649145	0
447	TR210642_c0_g1_i4	4A	104571793	104572471	0
448	TR150348_c0_g1_i3	4A	120699431	120701419	0
449	TR184445_c4_g1_i3	4A	127878007	127879814	0
450	TR237578_c0_g1_i1	4A	134090126	134092485	0
451	TR228485_c0_g3_i1	4A	140421559	140428084	0
452	TR176296_c0_g1_i2	4A	143680061	143681733	0
453	TR164172_c4_g1_i11	4A	149894524	149897137	0
454	TR183026_c0_g2_i8	4A	157394066	157400542	0
455	TR230772_c0_g1_i1	4A	159771615	159772865	0
456	TR207047_c2_g1_i1	4A	162439592	162442278	0
457	TR195175_c0_g1_i9	4A	167321441	167323738	0
458	TR183710_c3_g3_i5	4A	170388440	170391079	0
459	TR185487_c0_g1_i1	4A	181546351	181549613	0
460	TR219208_c0_g3_i22	4A	181639614	181652324	0
461	TR165294_c3_g5_i1	4A	182761884	182764076	0
462	TR179033_c0_g1_i2	4A	184457683	184459446	0
463	TR207188_c1_g3_i8	4A	186937916	186939849	0
464	TR221329_c1_g1_i1	4A	196906906	196908982	0
465	TR164045_c1_g1_i1	4A	199510749	199512163	0
466	TR172657_c2_g1_i7	4A	203802269	203804653	0
467	TR231097_c0_g1_i3	4A	206779739	206781295	0
890	TR164733_c5_g12_i4	4A	187065057	187065398	4e-174
918	TR238666_c0_g5_i2	4A	61734311	61735901	3e-162
921	TR163197_c1_g1_i4	4A	134123045	134124620	1e-161
936	TR223510_c1_g2_i3	4A	30494782	30497306	2e-154
946	TR235665_c0_g1_i2	4A	167132534	167134902	3e-150
1016	TR208341_c2_g4_i4	4A	52489008	52490726	7e-126
1037	TR170516_c1_g2_i2	4A	202170175	202172781	4e-119
1062	TR170925_c0_g1_i3	4A	55561117	55561442	2e-111
1067	TR196286_c0_g1_i3	4A	56439629	56441292	7e-109
1110	TR95459_c0_g1_i1	4A	72414907	72417105	3e-95
1133	TR208975_c2_g4_i4	4A	175364096	175366494	1e-89
1138	TR197617_c3_g1_i1	4A	55083274	55089532	2e-87
1174	TR217078_c0_g2_i3	4A	198099712	198101054	3e-76
1176	TR109934_c0_g1_i1	4A	1723991	1725434	3e-75
1206	TR152184_c0_g2_i1	4A	213891833	213896680	1e-66
2440	TCONS_00089728	4A	6522902	6523282
2441	TCONS_00086390	4A	8819947	8821384
2442	TCONS_00086436	4A	11535589	11536335
2443	TCONS_00089802	4A	13346424	13346877
2444	TCONS_00089801	4A	13346424	13346877
2445	TCONS_00089825	4A	15117679	15118447
2446	TCONS_00086547	4A	17982376	17982740
2447	TCONS_00089972	4A	25007311	25008523
2448	TCONS_00090031	4A	28400992	28401566
2449	TCONS_00090045	4A	29491441	29491712
2450	TCONS_00086808	4A	35260652	35260936
2451	TCONS_00086822	4A	38768970	38769677
2452	TCONS_00086834	4A	40674012	40674203
2453	TCONS_00090316	4A	44242703	44243047
2454	TCONS_00086856	4A	44313201	44315544
2455	TCONS_00086861	4A	44606012	44607478
2456	TCONS_00090445	4A	52113877	52114405
2457	TCONS_00090470	4A	53826044	53826507
2458	TCONS_00087063	4A	56439629	56441292
2459	TCONS_00087067	4A	56952859	56954014
2460	TCONS_00087071	4A	57399554	57399598
2461	TCONS_00090546	4A	57949567	57950133
2462	TCONS_00093294	4A	58227180	58227901
2463	TCONS_00090580	4A	60024669	60025131
2464	TCONS_00090596	4A	61081830	61082435
2465	TCONS_00087135	4A	61732875	61733558
2466	TCONS_00087139	4A	62403361	62403920
2467	TCONS_00090625	4A	62793876	62794637
2468	TCONS_00087168	4A	63724968	63725536
2469	TCONS_00090636	4A	64302953	64303384
2470	TCONS_00090640	4A	64624621	64624855
2471	TCONS_00087204	4A	66145862	66146034
2472	TCONS_00090680	4A	66187787	66188929
2473	TCONS_00087238	4A	68206151	68206578
2474	TCONS_00093313	4A	69979879	69980430
2475	TCONS_00093324	4A	76811695	76813493
2476	TCONS_00087388	4A	80731935	80732608
2477	TCONS_00090923	4A	80972360	80972875
2478	TCONS_00087401	4A	81039076	81039320
2479	TCONS_00087417	4A	84188379	84188657
2480	TCONS_00090969	4A	84553586	84554030
2481	TCONS_00087437	4A	86640945	86641826
2482	TCONS_00090992	4A	86643103	86643909
2483	TCONS_00093335	4A	86951378	86952725
2484	TCONS_00091037	4A	93984797	93985877
2485	TCONS_00091075	4A	99998171	99999666
2486	TCONS_00091084	4A	101376870	101377731
2487	TCONS_00091101	4A	103583006	103583206
2488	TCONS_00091171	4A	111319562	111320452
2489	TCONS_00091280	4A	117418896	117419378
2490	TCONS_00087722	4A	120699431	120700322
2491	TCONS_00087754	4A	122992298	122992513
2492	TCONS_00087760	4A	123909899	123911195
2493	TCONS_00087783	4A	127878007	127878297
2494	TCONS_00091456	4A	132422744	132424427
2495	TCONS_00091478	4A	133005714	133006264
2496	TCONS_00087853	4A	134090126	134092485
2497	TCONS_00087926	4A	137923071	137923413
2498	TCONS_00093425	4A	138244070	138245594
2499	TCONS_00091572	4A	139848698	139850518
2500	TCONS_00087976	4A	140341339	140341545
2501	TCONS_00088061	4A	141479006	141479483
2502	TCONS_00088062	4A	141666155	141666501
2503	TCONS_00091786	4A	149894524	149894802
2504	TCONS_00088203	4A	150548714	150549023
2505	TCONS_00091919	4A	157090541	157092345
2506	TCONS_00091917	4A	157090541	157093087
2507	TCONS_00092014	4A	159852707	159853188
2508	TCONS_00088531	4A	166064822	166065188
2509	TCONS_00088545	4A	167001934	167002012
2510	TCONS_00092128	4A	167321441	167322900
2511	TCONS_00092136	4A	167544795	167545137
2512	TCONS_00093511	4A	170410952	170411824
2513	TCONS_00088630	4A	170623757	170624743
2514	TCONS_00088632	4A	170627590	170628663
2515	TCONS_00088653	4A	171359913	171359985
2516	TCONS_00088665	4A	171691299	171693279
2517	TCONS_00088702	4A	173033160	173034595
2518	TCONS_00092370	4A	175285138	175285659
2519	TCONS_00092427	4A	176672360	176673852
2520	TCONS_00092447	4A	177251853	177252467
2521	TCONS_00093554	4A	177372107	177373178
2522	TCONS_00092499	4A	180854328	180855275
2523	TCONS_00088870	4A	181095382	181095663
2524	TCONS_00092529	4A	182761884	182764076
2525	TCONS_00088986	4A	186746937	186747306
2526	TCONS_00088995	4A	186937916	186938443
2527	TCONS_00092608	4A	187149221	187149550
2528	TCONS_00089011	4A	188100418	188101407
2529	TCONS_00089019	4A	188825238	188825614
2530	TCONS_00092702	4A	191212959	191214395
2531	TCONS_00092735	4A	193201097	193201571
2532	TCONS_00089204	4A	198087336	198087864
2533	TCONS_00093601	4A	198092909	198094103
2534	TCONS_00089205	4A	198099712	198099911
2535	TCONS_00092908	4A	203280608	203281430
2536	TCONS_00093624	4A	203618150	203620320
2537	TCONS_00092915	4A	203749757	203751107
2538	TCONS_00092916	4A	203802230	203803417
2539	TCONS_00092936	4A	205542171	205542399
2540	TCONS_00089416	4A	206779739	206781295
2541	TCONS_00089461	4A	209013469	209013563
2542	TCONS_00093036	4A	210996411	210997511
2543	TCONS_00093038	4A	211149413	211149687
2544	TCONS_00089534	4A	212414874	212415332
2545	TCONS_00093105	4A	213617528	213618609
2546	TCONS_00093683	4A	215328023	215329017
468	TR192178_c3_g1_i3	4B	2972720	2975542	0
469	TR76225_c0_g2_i1	4B	6707430	6709951	0
470	TR172278_c6_g1_i1	4B	9006185	9006910	0
471	TR195121_c0_g1_i3	4B	9766268	9767670	0
472	TR205438_c0_g5_i3	4B	11238835	11243239	0
473	TR207759_c3_g2_i1	4B	24000885	24005147	0
474	TR192218_c1_g2_i5	4B	28270751	28284629	0
475	TR182503_c1_g1_i2	4B	55010993	55012728	0
476	TR155771_c0_g1_i1	4B	103162593	103166525	0
477	TR219375_c0_g1_i8	4B	126017692	126024461	0
478	TR230784_c0_g1_i2	4B	174356991	174362133	0
479	TR209888_c0_g1_i1	4B	196462646	196474454	0
480	TR231140_c1_g3_i2	4B	201747634	201753744	0
481	TR181524_c0_g3_i7	4B	209867618	209870304	0
482	TR172733_c0_g2_i1	4B	240119515	240120743	0
483	TR232396_c0_g1_i1	4B	240610731	240611505	0
[truncated: 1,732 more rows]

## Sheet: The first circle_NHNvsH(I.T)
Gene_id	Gene ID	Chr_start	Chr_end	FDR	Geninfo identifier	E-value	Function annotation
TCONS_00000031	1A	1527571	1528404	0.0290943	gi|326516936|dbj|BAJ96460.1|	0	predicted protein [Hordeum vulgare subsp. vulgare]
TCONS_00000057	1A	1989259	1989290	0.0123791	gi|326527371|dbj|BAK04627.1|	5.1e-101	predicted protein [Hordeum vulgare subsp. vulgare]
TCONS_00000102	1A	3430893	3431132	0.0146357	gi|475604557|gb|EMT25778.1|	6e-134	Chalcone--flavonone isomerase 1B-1 [Aegilops tauschii]
TCONS_00000278	1A	11203446	11204955	0.0409636	gi|326531972|dbj|BAK01362.1|	4.65e-124	predicted protein [Hordeum vulgare subsp. vulgare]
TCONS_00000432	1A	20052212	20052548	0.0130234	gi|326492113|dbj|BAJ98281.1|	2.32e-29	predicted protein [Hordeum vulgare subsp. vulgare]
TCONS_00000554	1A	34337860	34338329	0.0334854	gi|414868331|tpg|DAA46888.1|	5.24e-07	TPA: hypothetical protein ZEAMMB73_163327, partial [Zea mays]
TCONS_00000727	1A	48387638	48388154	0.00941284	gi|326510159|dbj|BAJ87296.1|	0	predicted protein [Hordeum vulgare subsp. vulgare]
TCONS_00000781	1A	53915152	53915585	0.0217343	gi|474427863|gb|EMS67820.1|	2.89e-122	Xaa-Pro aminopeptidase 1 [Triticum urartu]
TCONS_00000867	1A	58840799	58842086	0.0287783	gi|473942389|gb|EMS50392.1|	9.14e-128	putative calcium-binding protein CML11 [Triticum urartu]
TCONS_00000896	1A	60820981	60821074	0.0478231	gi|414869783|tpg|DAA48340.1|	7.76e-19	TPA: hypothetical protein ZEAMMB73_848257 [Zea mays]
TCONS_00000917	1A	61320805	61321391	0.0464116	gi|475540221|gb|EMT09561.1|	1.34e-62	hypothetical protein F775_08690 [Aegilops tauschii]
TCONS_00000982	1A	66811412	66811982	0.0292864	gi|475616687|gb|EMT29855.1|	6.32e-32	hypothetical protein F775_43555 [Aegilops tauschii]
TCONS_00001128	1A	77776204	77776494	0.0263609	gi|669030958|emb|CDM85676.1|	3.67e-22	unnamed protein product [Triticum aestivum]
TCONS_00001309	1A	94003433	94003886	0.0239537	NA	NA	NA
TCONS_00001324	1A	94708835	94709397	0.0130799	gi|326519803|dbj|BAK00274.1|	1.95e-09	predicted protein [Hordeum vulgare subsp. vulgare]
TCONS_00001332	1A	94781318	94782214	1.06e-59	gi|326521328|dbj|BAJ96867.1|	0	predicted protein [Hordeum vulgare subsp. vulgare]
TCONS_00001493	1A	105813628	105813728	0.0165718	gi|944052289|gb|KQJ87927.1|	1.48e-119	hypothetical protein BRADI_4g14273 [Brachypodium distachyon]
TCONS_00001496	1A	105814791	105815010	0.046316	gi|944052289|gb|KQJ87927.1|	4.6e-115	hypothetical protein BRADI_4g14273 [Brachypodium distachyon]
TCONS_00001547	1A	108266302	108266533	0.036271	gi|357112201|ref|XP_003557898.1|	5.4e-54	PREDICTED: protein EARLY RESPONSIVE TO DEHYDRATION 15 [Brachypodium distachyon]
TCONS_00001548	1A	108266302	108266533	0.0397739	gi|357112201|ref|XP_003557898.1|	8.87e-54	PREDICTED: protein EARLY RESPONSIVE TO DEHYDRATION 15 [Brachypodium distachyon]
TCONS_00001614	1A	115648067	115648225	0.00119153	gi|473794465|gb|EMS46456.1|	0	Lysosomal alpha-mannosidase [Triticum urartu]
TCONS_00001709	1A	127826402	127827411	0.0236587	gi|326497957|dbj|BAJ94841.1|	1.31e-44	predicted protein [Hordeum vulgare subsp. vulgare]
TCONS_00001932	1A	159716639	159717036	0.00383526	gi|326509031|dbj|BAJ86908.1|	2.87e-63	predicted protein [Hordeum vulgare subsp. vulgare]
TCONS_00001975	1A	164658879	164658937	0.00278256	gi|670425677|ref|XP_008653462.1|	2.3e-16	PREDICTED: uncharacterized protein LOC103633552 [Zea mays]
TCONS_00002133	1A	180673145	180674239	0.00080977	gi|148596802|dbj|BAF63628.1|	0	cytochrome P450 [Lolium rigidum]
TCONS_00002170	1A	182994711	182996227	0.00416292	gi|699262619|gb|AIU41598.1|	8.86e-58	CO-like protein [Triticum aestivum]
TCONS_00002328	1A	194464004	194464632	0.039945	gi|326516642|dbj|BAJ92476.1|	0	predicted protein [Hordeum vulgare subsp. vulgare]
TCONS_00002580	1A	211279497	211279553	0.0428254	gi|475603157|gb|EMT25329.1|	0	Heat shock 70 kDa protein, mitochondrial [Aegilops tauschii]
TCONS_00002581	1A	211279497	211279553	0.00300528	gi|475603157|gb|EMT25329.1|	0	Heat shock 70 kDa protein, mitochondrial [Aegilops tauschii]
TCONS_00002618	1A	212121507	212121750	0.0272449	gi|326519833|dbj|BAK00289.1|	3.7e-160	predicted protein [Hordeum vulgare subsp. vulgare]
TCONS_00002670	1A	215464652	215464934	0.0159494	gi|764399182|gb|AJR22386.1|	0	CBL-interacting protein kinase 28 [Triticum aestivum]
TCONS_00002710	1A	217137379	217137625	0.0124573	gi|475529519|gb|EMT07774.1|	3.94e-75	hypothetical protein F775_04862 [Aegilops tauschii]
TCONS_00002919	1A	225601311	225602134	0.0242745	gi|475545081|gb|EMT10435.1|	0	hypothetical protein F775_20978 [Aegilops tauschii]
TCONS_00002957	1A	226502151	226503255	0.0301893	gi|326504824|dbj|BAK06703.1|	1.55e-18	predicted protein [Hordeum vulgare subsp. vulgare]
TCONS_00003119	1A	230709583	230709808	0.0492365	gi|473759967|gb|EMS45818.1|	0	ABC transporter A family member 7 [Triticum urartu]
TCONS_00003126	1A	231301535	231301780	0.0330078	gi|326523321|dbj|BAJ88701.1|	0	predicted protein [Hordeum vulgare subsp. vulgare]
TCONS_00003276	1A	234879787	234880401	0.0182728	gi|226492461|ref|NP_001147356.1|	1.02e-80	AP2 domain containing protein [Zea mays]
TCONS_00003386	1A	236800623	236801754	0.0030008	gi|326518784|dbj|BAJ92553.1|	1.84e-85	predicted protein [Hordeum vulgare subsp. vulgare]
TCONS_00003404	1A	237704647	237705800	0.0228195	gi|326521796|dbj|BAK00474.1|	7.11e-81	predicted protein [Hordeum vulgare subsp. vulgare]
TCONS_00003432	1A	239192201	239192695	0.0123434	gi|473980733|gb|EMS51555.1|	4.16e-173	Uncharacterized protein ycf23 [Triticum urartu]
TCONS_00003575	1A	244421324	244422319	0.000421144	gi|474042675|gb|EMS53318.1|	0	putative mitochondrial chaperone BCS1-B [Triticum urartu]
TCONS_00003592	1A	244562262	244563859	0.00216336	gi|474100192|gb|EMS55202.1|	3.15e-92	Dihydroflavonol-4-reductase [Triticum urartu]
TCONS_00003610	1A	245055352	245056151	0.0133214	gi|474057053|gb|EMS53836.1|	4.81e-88	Calmodulin-like protein 5 [Triticum urartu]
TCONS_00003617	1A	245398783	245399348	0.00770159	gi|475611311|gb|EMT28041.1|	0	hypothetical protein F775_17066 [Aegilops tauschii]
TCONS_00003632	1A	246325120	246325462	0.0419368	gi|474241763|gb|EMS59833.1|	0	hypothetical protein TRIUR3_17784 [Triticum urartu]
TCONS_00003728	1A	65551	66018	0.0129872	gi|473889696|gb|EMS48527.1|	5.03e-76	50S ribosomal protein L28, chloroplastic [Triticum urartu]
TCONS_00003800	1A	2028437	2029444	0.00461513	gi|326508650|dbj|BAJ95847.1|	1.4e-118	predicted protein, partial [Hordeum vulgare subsp. vulgare]
TCONS_00003807	1A	2207556	2207990	0.0113728	gi|326534342|dbj|BAJ89521.1|	1.03e-62	predicted protein [Hordeum vulgare subsp. vulgare]
TCONS_00003885	1A	3222564	3225650	0.017775	gi|473886552|gb|EMS48158.1|	0	Disease resistance protein RPM1 [Triticum urartu]
TCONS_00003907	1A	4344511	4345973	0.0263473	gi|326512716|dbj|BAK03265.1|	6.51e-102	predicted protein [Hordeum vulgare subsp. vulgare]
TCONS_00003938	1A	5894582	5896693	0.0441561	gi|475611581|gb|EMT28136.1|	0	Phenylalanine ammonia-lyase [Aegilops tauschii]
TCONS_00004094	1A	13376232	13378485	0.0383402	gi|326499876|dbj|BAJ90773.1|	0	predicted protein [Hordeum vulgare subsp. vulgare]
TCONS_00004206	1A	22158671	22159572	0.0483988	NA	NA	NA
TCONS_00004256	1A	26189311	26189623	0.0370201	gi|474237686|gb|EMS59649.1|	0	hypothetical protein TRIUR3_17845 [Triticum urartu]
TCONS_00004401	1A	35130557	35130881	0.00219429	NA	NA	NA
TCONS_00004571	1A	49190672	49191800	0.00696653	gi|474377102|gb|EMS64272.1|	1.67e-22	hypothetical protein TRIUR3_12589 [Triticum urartu]
TCONS_00004587	1A	50522937	50523391	0.0078821	gi|326487522|dbj|BAJ89745.1|	2.52e-104	predicted protein [Hordeum vulgare subsp. vulgare]
TCONS_00005213	1A	101672986	101673440	0.0218629	gi|326490533|dbj|BAJ84930.1|	6.78e-174	predicted protein [Hordeum vulgare subsp. vulgare]
TCONS_00005376	1A	113687705	113688104	0.000978312	gi|473822509|gb|EMS47073.1|	7.61e-128	putative lactoylglutathione lyase, chloroplast [Triticum urartu]
TCONS_00005454	1A	123845829	123846447	0.0302907	gi|326522773|dbj|BAJ88432.1|	1.68e-123	predicted protein [Hordeum vulgare subsp. vulgare]
TCONS_00005498	1A	128709992	128711002	0.0055378	gi|357141563|ref|XP_003572269.1|	0	PREDICTED: serine/threonine-protein kinase At5g01020-like [Brachypodium distachyon]
TCONS_00005581	1A	140271750	140273999	0.0186555	gi|567217004|ref|XP_006412131.1|	3.97e-15	hypothetical protein EUTSA_v10024929mg [Eutrema salsugineum]
TCONS_00005595	1A	142319906	142320284	0.00904264	gi|56784556|dbj|BAD81603.1|	0	helicase-like protein [Oryza sativa Japonica Group]
TCONS_00005688	1A	157604706	157605678	0.00638807	gi|474417073|gb|EMS67261.1|	1.06e-56	Histone H4 [Triticum urartu]
TCONS_00005870	1A	178744572	178745702	0.00162435	gi|357141098|ref|XP_003572083.1|	0	PREDICTED: ABC transporter E family member 2-like isoform X1 [Brachypodium distachyon]
TCONS_00005881	1A	179602277	179603240	0.00859893	gi|474074751|gb|EMS54534.1|	4.6e-16	Valyl-tRNA synthetase [Triticum urartu]
TCONS_00005995	1A	186197793	186199172	0.0143134	gi|357133908|ref|XP_003568563.1|	1.03e-73	PREDICTED: probable calcium-binding protein CML15 [Brachypodium distachyon]
TCONS_00006180	1A	197829508	197830026	0.0250369	gi|475573936|gb|EMT16851.1|	2.39e-172	Pyruvate kinase isozyme G, chloroplastic [Aegilops tauschii]
TCONS_00006194	1A	198010320	198010618	0.0308437	gi|475553895|gb|EMT12111.1|	1.23e-99	hypothetical protein F775_04480 [Aegilops tauschii]
TCONS_00006234	1A	200335264	200335626	0.0310786	gi|475585355|gb|EMT20034.1|	4.64e-125	hypothetical protein F775_27640 [Aegilops tauschii]
TCONS_00006235	1A	200335449	200338783	0.00877901	gi|326509601|dbj|BAJ87016.1|	4.55e-169	predicted protein [Hordeum vulgare subsp. vulgare]
TCONS_00006264	1A	204365399	204366421	0.0236814	gi|413945341|gb|AFW77990.1|	3.71e-103	hypothetical protein ZEAMMB73_255065 [Zea mays]
TCONS_00006265	1A	204612328	204613619	0.00526388	gi|937919295|dbj|BAS94213.1|	1.09e-06	Os05g0437401 [Oryza sativa Japonica Group]
TCONS_00006289	1A	206605855	206606141	0.0304275	gi|146330993|gb|ABQ23215.1|	7.17e-63	LSD1-type zinc finger protein [Triticum aestivum]
TCONS_00006431	1A	214779677	214779944	0.00690089	gi|474379028|gb|EMS64426.1|	9.5e-74	Coatomer subunit zeta-1 [Triticum urartu]
TCONS_00006438	1A	215417135	215417475	0.00235468	gi|475562885|gb|EMT14158.1|	5.63e-56	Putative LRR receptor-like serine/threonine-protein kinase [Aegilops tauschii]
TCONS_00006459	1A	216484377	216485605	0.000569562	gi|474419310|gb|EMS67413.1|	3.37e-180	putative WRKY transcription factor 70 [Triticum urartu]
TCONS_00006494	1A	219082461	219083264	0.0206812	gi|475627590|gb|EMT33703.1|	0	Putative LRR receptor-like serine/threonine-protein kinase [Aegilops tauschii]
TCONS_00006655	1A	224236514	224236618	0.0479621	gi|475607458|gb|EMT26715.1|	0	hypothetical protein F775_19999 [Aegilops tauschii]
TCONS_00006805	1A	229355459	229357294	0.00177362	gi|326504148|dbj|BAK02860.1|	0	predicted protein [Hordeum vulgare subsp. vulgare]
TCONS_00006832	1A	230941738	230942147	0.00682943	gi|473891999|gb|EMS48795.1|	0	O-methyltransferase ZRP4 [Triticum urartu]
TCONS_00006835	1A	231028841	231029105	0.0310574	NA	NA	NA
TCONS_00006908	1A	233572793	233573189	0.00613065	gi|326487518|dbj|BAJ89743.1|	6.61e-170	predicted protein, partial [Hordeum vulgare subsp. vulgare]
TCONS_00007037	1A	237378275	237378953	1.03e-59	gi|357166028|ref|XP_003580573.1|	0	PREDICTED: ABC transporter C family member 2-like [Brachypodium distachyon]
TCONS_00007082	1A	239901272	239901670	0.0193554	gi|475582087|gb|EMT19031.1|	6.68e-28	GTP-binding era-like protein [Aegilops tauschii]
TCONS_00007202	1A	244099731	244100339	0.0201622	gi|474042679|gb|EMS53322.1|	9.8e-61	putative mitochondrial chaperone BCS1-B [Triticum urartu]
TCONS_00007221	1A	244811924	244812238	0.0125156	gi|474299507|gb|EMS61561.1|	0	hypothetical protein TRIUR3_07762 [Triticum urartu]
TCONS_00007289	1A	678569	679520	0.0465385	NA	NA	NA
TCONS_00007321	1A	7651327	7652204	0.00997116	gi|475583307|gb|EMT19417.1|	4.91e-75	hypothetical protein F775_29535 [Aegilops tauschii]
TCONS_00007424	1A	39773681	39774365	0.000986192	gi|473930244|gb|EMS49944.1|	6.73e-68	hypothetical protein TRIUR3_09896 [Triticum urartu]
TCONS_00007501	1A	75019142	75019961	0.0196096	gi|475532687|gb|EMT08263.1|	2.7e-62	hypothetical protein F775_05985 [Aegilops tauschii]
TCONS_00007658	1A	139147031	139148392	0.00468903	gi|474253943|gb|EMS60333.1|	1.48e-28	hypothetical protein TRIUR3_18980 [Triticum urartu]
TCONS_00007756	1A	181982175	181983747	0.0202321	gi|474252286|gb|EMS60239.1|	1.95e-31	hypothetical protein TRIUR3_10413 [Triticum urartu]
TCONS_00007784	1A	194919455	194920685	0.0303842	gi|218198193|gb|EEC80620.1|	5.77e-91	hypothetical protein OsI_22990 [Oryza sativa Indica Group]
TCONS_00007893	1A	222778402	222781180	0.000744128	gi|24474928|emb|CAC84121.1|	5.46e-69	glutenin high molecular weight subunit, partial [Triticum aestivum]
TCONS_00008010	1A	245554961	245555458	0.0108408	gi|475616548|gb|EMT29803.1|	1.12e-30	Putative mitochondrial chaperone BCS1-B [Aegilops tauschii]
TR111983_c0_g1_i1	1A	1527571	1531324	0.0186044	gi|217426773|gb|ACK44486.1|	3.49e-29	LRR19 [Triticum aestivum]
TR115079_c0_g1_i3	1A	247396429	247400227	0.00946122	gi|835949935|ref|XP_012700218.1|	0	PREDICTED: DEAD-box ATP-dependent RNA helicase 15 isoform X1 [Setaria italica]
TR122209_c0_g1_i1	1A	89529074	89530324	0.0437912	gi|326494866|dbj|BAJ94552.1|	0	predicted protein [Hordeum vulgare subsp. vulgare]
TR129596_c0_g1_i1	1A	230869169	230871718	0.0346181	gi|473886434|gb|EMS48151.1|	8.74e-115	putative glutamyl-tRNA synthetase, cytoplasmic [Triticum urartu]
TR149134_c1_g1_i3	1A	29394218	29398817	0.0467071	gi|474100450|gb|EMS55224.1|	9.11e-62	hypothetical protein TRIUR3_33303 [Triticum urartu]
TR151575_c0_g2_i2	1A	84394707	84408947	0.0462509	gi|473957828|gb|EMS51006.1|	2.66e-28	UDP-glucose:glycoprotein glucosyltransferase 1 [Triticum urartu]
TR153437_c1_g1_i1	1A	50962667	50966165	6.97e-06	gi|326532882|dbj|BAJ89286.1|	4.71e-52	predicted protein [Hordeum vulgare subsp. vulgare]
TR153755_c2_g2_i3	1A	209237807	209239321	0.0213109	gi|475508698|gb|EMT05112.1|	2.92e-41	NAC domain-containing protein 90 [Aegilops tauschii]
TR159209_c6_g1_i1	1A	241847528	241850090	0.0166894	gi|475387019|gb|EMT00686.1|	9.72e-88	Putative receptor-like protein kinase [Aegilops tauschii]
TR164985_c0_g1_i11	1A	194464004	194467212	0.0448636	gi|326516642|dbj|BAJ92476.1|	0	predicted protein [Hordeum vulgare subsp. vulgare]
TR169738_c1_g1_i1	1A	240338461	240339461	0.00106005	gi|475514270|gb|EMT05704.1|	2.83e-50	Putative WRKY transcription factor 41 [Aegilops tauschii]
TR170927_c5_g1_i2	1A	195907932	195910475	0.0186505	gi|326498343|dbj|BAJ98599.1|	5.79e-41	predicted protein [Hordeum vulgare subsp. vulgare]
TR172214_c0_g2_i2	1A	226502151	226503255	0.000377316	gi|326504824|dbj|BAK06703.1|	0	predicted protein [Hordeum vulgare subsp. vulgare]
TR175619_c5_g1_i5	1A	210189391	210191737	0.00395945	gi|475569698|gb|EMT15833.1|	2.19e-10	hypothetical protein F775_24173 [Aegilops tauschii]
TR175660_c1_g1_i1	1A	233586562	233590588	0.0296506	gi|475556926|gb|EMT12726.1|	7.66e-12	hypothetical protein F775_25923 [Aegilops tauschii]
TR180472_c0_g4_i4	1A	49010263	49012386	0.00558102	gi|475616763|gb|EMT29875.1|	4.96e-128	hypothetical protein F775_05828 [Aegilops tauschii]
TR182393_c0_g2_i1	1A	190932683	190938731	0.0342279	gi|326495400|dbj|BAJ85796.1|	1.88e-151	predicted protein [Hordeum vulgare subsp. vulgare]
TR186665_c0_g3_i2	1A	65551	67438	0.018467	gi|473889696|gb|EMS48527.1|	6.66e-77	50S ribosomal protein L28, chloroplastic [Triticum urartu]
TR188191_c6_g1_i2	1A	93445211	93451804	0.030542	gi|326508768|dbj|BAJ95906.1|	0	predicted protein [Hordeum vulgare subsp. vulgare]
TR189405_c1_g2_i1	1A	231383319	231391479	0.0157744	gi|242081219|ref|XP_002445378.1|	0	hypothetical protein SORBIDRAFT_07g014870 [Sorghum bicolor]
TR189405_c1_g2_i3	1A	231383319	231391479	0.00793658	gi|475588023|gb|EMT20734.1|	0	Wall-associated receptor kinase 3 [Aegilops tauschii]
TR190812_c0_g1_i2	1A	50522937	50524171	0.0271262	gi|326487522|dbj|BAJ89745.1|	5.86e-97	predicted protein [Hordeum vulgare subsp. vulgare]
TR191564_c0_g1_i4	1A	1737088	1737425	0.0403635	gi|326488729|dbj|BAJ97976.1|	2.74e-47	predicted protein [Hordeum vulgare subsp. vulgare]
TR192252_c0_g2_i2	1A	186197793	186199172	0.0118988	gi|475565232|gb|EMT14746.1|	8.93e-18	hypothetical protein F775_42299 [Aegilops tauschii]
TR192420_c1_g1_i8	1A	204365399	204366421	0.046166	gi|326510091|dbj|BAJ87262.1|	0	predicted protein [Hordeum vulgare subsp. vulgare]
TR196234_c3_g1_i4	1A	220260366	220262613	0.0319943	gi|326518854|dbj|BAJ92588.1|	7.55e-65	predicted protein [Hordeum vulgare subsp. vulgare]
TR196264_c0_g1_i1	1A	225189569	225192935	0.00400803	gi|326489901|dbj|BAJ94024.1|	2.12e-106	predicted protein [Hordeum vulgare subsp. vulgare]
TR198129_c2_g1_i1	1A	204612328	204613619	0.0053484	gi|937919295|dbj|BAS94213.1|	8.06e-07	Os05g0437401 [Oryza sativa Japonica Group]
TR198158_c0_g1_i1	1A	199247721	199250553	0.0341781	gi|474369382|gb|EMS63724.1|	1.83e-100	Nucleoside diphosphate kinase 1 [Triticum urartu]
TR198668_c1_g1_i3	1A	205284603	205287609	0.0368814	gi|357133425|ref|XP_003568325.1|	9.34e-162	PREDICTED: uracil phosphoribosyltransferase [Brachypodium distachyon]
TR206829_c0_g1_i2	1A	75039139	75042581	0.00151717	gi|326517731|dbj|BAK03784.1|	0	predicted protein [Hordeum vulgare subsp. vulgare]
TR207114_c4_g1_i1	1A	205633459	205635209	0.0293428	gi|475539371|gb|EMT09404.1|	0	Aldose reductase [Aegilops tauschii]
TR207114_c4_g1_i8	1A	205633459	205635209	0.0135797	gi|475539371|gb|EMT09404.1|	8.98e-159	Aldose reductase [Aegilops tauschii]
TR207695_c0_g1_i2	1A	244421324	244422577	0.0196502	gi|474042677|gb|EMS53320.1|	1.46e-19	putative mitochondrial chaperone BCS1-B [Triticum urartu]
TR207695_c0_g2_i9	1A	244421324	244422577	0.00204601	gi|475616548|gb|EMT29803.1|	6.94e-163	Putative mitochondrial chaperone BCS1-B [Aegilops tauschii]
TR209911_c0_g1_i4	1A	183180552	183181281	0.00105192	gi|475565083|gb|EMT14697.1|	6.28e-75	hypothetical protein F775_11966 [Aegilops tauschii]
TR210474_c0_g1_i2	1A	41938204	41939609	0.010519	gi|474388587|gb|EMS65141.1|	1.88e-49	hypothetical protein TRIUR3_28016 [Triticum urartu]
TR214549_c1_g1_i1	1A	186227286	186229705	0.02338	gi|357147193|ref|XP_003574255.1|	8.58e-133	PREDICTED: uncharacterized protein LOC100822657 [Brachypodium distachyon]
TR215184_c1_g1_i1	1A	233572793	233579027	0.00158448	gi|326487518|dbj|BAJ89743.1|	0	predicted protein, partial [Hordeum vulgare subsp. vulgare]
TR216067_c0_g1_i3	1A	220794903	220798392	0.04629	gi|357133214|ref|XP_003568222.1|	0	PREDICTED: uncharacterized protein LOC100842130 [Brachypodium distachyon]
TR219791_c2_g1_i1	1A	199288318	199295940	0.0175758	gi|113374086|dbj|BAF03602.1|	3.19e-174	casein kinase II beta [Hordeum vulgare]
TR223509_c5_g2_i6	1A	116014939	116018581	0.00417016	gi|764399092|gb|AJR22378.1|	5.9e-64	CBL-interacting protein kinase 17 [Triticum aestivum]
TR226636_c0_g2_i1	1A	213980898	213983680	0.0377288	gi|326514332|dbj|BAJ96153.1|	0	predicted protein [Hordeum vulgare subsp. vulgare]
TR229760_c0_g2_i1	1A	230487029	230490805	0.0463865	gi|326521540|dbj|BAK00346.1|	6.76e-130	predicted protein [Hordeum vulgare subsp. vulgare]
TR232223_c0_g1_i1	1A	2547013	2548072	0.0324854	gi|326512302|dbj|BAJ99506.1|	8.57e-48	predicted protein [Hordeum vulgare subsp. vulgare]
TR234925_c2_g1_i1	1A	209237807	209239321	0.0256212	gi|326505848|dbj|BAJ91163.1|	1.18e-48	predicted protein [Hordeum vulgare subsp. vulgare]
TR235412_c0_g1_i3	1A	242308895	242309099	0.0365465	gi|326533198|dbj|BAJ93571.1|	0	predicted protein [Hordeum vulgare subsp. vulgare]
TR235659_c9_g1_i3	1A	198010320	198011283	0.0311592	gi|944061745|gb|KQJ97335.1|	1.55e-104	hypothetical protein BRADI_3g30150 [Brachypodium distachyon]
TR235848_c0_g1_i3	1A	232259560	232260710	0.00265335	gi|473814309|gb|EMS46889.1|	1.81e-24	hypothetical protein TRIUR3_11094 [Triticum urartu]
TR237492_c0_g1_i2	1A	51641072	51643218	0.00513671	gi|475525455|gb|EMT07165.1|	0	Tyrosyl-tRNA synthetase [Aegilops tauschii]
TR237665_c0_g1_i2	1A	791914	794690	0.00606713	gi|37788308|gb|AAP44535.1|	5.94e-137	cyclophilin-like protein [Triticum aestivum]
TR237964_c0_g3_i10	1A	222313103	222317445	0.0283914	gi|474121507|gb|EMS56052.1|	1.14e-40	hypothetical protein TRIUR3_20763 [Triticum urartu]
TR239149_c1_g1_i1	1A	9035749	9038101	0.0221763	gi|474137047|gb|EMS56394.1|	0	hypothetical protein TRIUR3_32493 [Triticum urartu]
TR89124_c0_g1_i1	1A	240553240	240558475	1.03e-59	gi|449466825|ref|XP_004151126.1|	0	PREDICTED: aspartic proteinase A1-like [Cucumis sativus]
TR89440_c0_g1_i2	1A	227924509	227925609	0.0139097	NA	NA	NA
TR93872_c0_g1_i1	1A	245517878	245518438	0.0408593	gi|475413675|gb|EMT00946.1|	7.6e-103	Putative calcium-binding protein CML17 [Aegilops tauschii]
TR94806_c0_g1_i2	1A	228926843	228928144	0.049837	gi|429201197|gb|AFZ77240.1|	6.4e-15	salt-induced protein [Leymus chinensis]
TR96705_c0_g1_i2	1A	221620184	221620675	0.0333752	NA	NA	NA
TCONS_00008046	1B	1472642	1472810	0.00263722	gi|37788312|gb|AAP44537.1|	6.03e-137	cyclophilin-like protein [Triticum aestivum]
TCONS_00008154	1B	5848416	5848659	0.0332658	gi|326499510|dbj|BAJ86066.1|	0	predicted protein [Hordeum vulgare subsp. vulgare]
TCONS_00008251	1B	11139359	11139602	0.00455456	gi|475604557|gb|EMT25778.1|	1.25e-71	Chalcone--flavonone isomerase 1B-1 [Aegilops tauschii]
TCONS_00008537	1B	33965346	33966056	0.0455175	gi|474326909|gb|EMS62504.1|	4.1e-08	Citrate synthase 4, mitochondrial [Triticum urartu]
TCONS_00008760	1B	51217842	51218256	4.48e-05	gi|475538975|gb|EMT09330.1|	0	CBL-interacting protein kinase 17 [Aegilops tauschii]
TCONS_00009182	1B	87061253	87061281	0.0467476	gi|473732892|gb|EMS45220.1|	4.37e-25	hypothetical protein TRIUR3_20954 [Triticum urartu]
TCONS_00009222	1B	89187035	89188135	0.0120062	gi|474070029|gb|EMS54316.1|	2.91e-30	hypothetical protein TRIUR3_14703 [Triticum urartu]
TCONS_00009245	1B	90853301	90854814	0.0217108	NA	NA	NA
TCONS_00009356	1B	103992238	103992441	0.0348722	gi|357134486|ref|XP_003568848.1|	9.1e-174	PREDICTED: uncharacterized protein LOC100826130 [Brachypodium distachyon]
TCONS_00009396	1B	109645881	109646737	0.0272386	gi|326495574|dbj|BAJ85883.1|	3.05e-157	predicted protein [Hordeum vulgare subsp. vulgare]
TCONS_00009435	1B	112473375	112473647	0.0120093	gi|474113455|gb|EMS55736.1|	0	hypothetical protein TRIUR3_30853 [Triticum urartu]
TCONS_00009470	1B	115315675	115317046	0.012463	gi|937908307|dbj|BAS83227.1|	1.13e-17	Os03g0244600, partial [Oryza sativa Japonica Group]
TCONS_00010365	1B	174931716	174932045	0.0489539	gi|326515088|dbj|BAK03457.1|	0	predicted protein [Hordeum vulgare subsp. vulgare]
TCONS_00010416	1B	179106387	179106677	0.00372495	gi|326503310|dbj|BAJ99280.1|	1.7e-20	predicted protein [Hordeum vulgare subsp. vulgare]
TCONS_00010462	1B	180417355	180417402	0.0075086	gi|473951540|gb|EMS50752.1|	3.02e-103	Luminal-binding protein 1 [Triticum urartu]
TCONS_00011074	1B	227279575	227279734	0.00377534	gi|475581806|gb|EMT18948.1|	1.57e-75	hypothetical protein F775_28211 [Aegilops tauschii]
TCONS_00011187	1B	238192252	238193032	0.0433102	gi|474417073|gb|EMS67261.1|	1.99e-53	Histone H4 [Triticum urartu]
TCONS_00011199	1B	239039776	239040318	0.0117845	gi|473970743|gb|EMS51428.1|	0	hypothetical protein TRIUR3_08483 [Triticum urartu]
TCONS_00011324	1B	248097962	248099702	0.0454465	NA	NA	NA
TCONS_00011495	1B	260034238	260034375	0.00204573	gi|475562449|gb|EMT14036.1|	3.88e-10	DNA polymerase III subunit gamma/tau [Aegilops tauschii]
TCONS_00011507	1B	260764453	260764901	0.0250837	gi|326533140|dbj|BAJ93542.1|	2.11e-173	predicted protein [Hordeum vulgare subsp. vulgare]
TCONS_00011620	1B	269044677	269044783	0.032439	gi|475571331|gb|EMT16220.1|	0	Phospholipase D beta 1 [Aegilops tauschii]
TCONS_00011656	1B	270330647	270330737	0.0213609	gi|357132751|ref|XP_003567992.1|	2.29e-152	PREDICTED: probable homogentisate phytyltransferase 2, chloroplastic [Brachypodium distachyon]
TCONS_00011736	1B	274604583	274604694	0.0393979	gi|326511357|dbj|BAJ87692.1|	0	predicted protein [Hordeum vulgare subsp. vulgare]
TCONS_00011956	1B	283347908	283347973	0.019102	gi|475469617|gb|EMT02323.1|	0	Ribosome maturation factor rimM [Aegilops tauschii]
TCONS_00011975	1B	284166965	284167429	0.0444212	gi|326521796|dbj|BAK00474.1|	3.27e-72	predicted protein [Hordeum vulgare subsp. vulgare]
TCONS_00012063	1B	288264405	288265292	0.00436494	gi|475594532|gb|EMT22712.1|	0	Putative LRR receptor-like serine/threonine-protein kinase [Aegilops tauschii]
TCONS_00012101	1B	288977780	288978122	0.0446694	gi|475501458|gb|EMT04330.1|	5.93e-137	Nucleoside diphosphate kinase 4, chloroplastic [Aegilops tauschii]
TCONS_00012141	1B	292325667	292326171	0.00644537	gi|474042676|gb|EMS53319.1|	0	putative mitochondrial chaperone BCS1-B [Triticum urartu]
TCONS_00012295	1B	880274	881681	0.000206185	gi|475617113|gb|EMT29999.1|	0	Wall-associated receptor kinase 4 [Aegilops tauschii]
TCONS_00012445	1B	7882521	7884662	0.0149553	gi|326491913|dbj|BAJ98181.1|	0	predicted protein [Hordeum vulgare subsp. vulgare]
TCONS_00012495	1B	9506876	9507317	0.0147376	NA	NA	NA
TCONS_00012500	1B	9892582	9893639	0.0314139	gi|475604559|gb|EMT25780.1|	0	hypothetical protein F775_28922 [Aegilops tauschii]
TCONS_00012525	1B	10400003	10400369	0.00446724	gi|475562024|gb|EMT13904.1|	1.44e-100	Soluble inorganic pyrophosphatase [Aegilops tauschii]
TCONS_00012732	1B	25195888	25196276	0.0265085	gi|473939953|gb|EMS50292.1|	0	hypothetical protein TRIUR3_32307 [Triticum urartu]
TCONS_00012989	1B	41200624	41201039	0.0141679	gi|326494786|dbj|BAJ94512.1|	0	predicted protein [Hordeum vulgare subsp. vulgare]
TCONS_00013018	1B	45636797	45637189	0.0011447	gi|475513970|gb|EMT05672.1|	0	Cysteinyl-tRNA synthetase [Aegilops tauschii]
TCONS_00013378	1B	69106098	69107109	0.00135308	gi|357141563|ref|XP_003572269.1|	0	PREDICTED: serine/threonine-protein kinase At5g01020-like [Brachypodium distachyon]
TCONS_00013387	1B	69753800	69754874	0.000178616	gi|475553596|gb|EMT12056.1|	9.5e-29	hypothetical protein F775_43762 [Aegilops tauschii]
TCONS_00013443	1B	77079110	77079445	0.0265221	gi|326497881|dbj|BAJ94803.1|	0	predicted protein [Hordeum vulgare subsp. vulgare]
TCONS_00013875	1B	109411611	109413757	0.0142316	gi|474447402|gb|EMS68651.1|	0	Serine/threonine protein phosphatase 2A 57 kDa regulatory subunit B&apos; iota isoform [Triticum urartu]
TCONS_00014005	1B	118359728	118361027	0.00253015	gi|475610019|gb|EMT27589.1|	1.29e-164	Putative cyclin-dependent kinase F-2 [Aegilops tauschii]
TCONS_00014100	1B	129309266	129309791	0.00102237	gi|514801523|ref|XP_004975665.1|	3.48e-14	PREDICTED: acyl-coenzyme A thioesterase 13-like [Setaria italica]
TCONS_00014116	1B	129309266	129309791	0.0180314	gi|514801523|ref|XP_004975665.1|	5.88e-14	PREDICTED: acyl-coenzyme A thioesterase 13-like [Setaria italica]
TCONS_00014370	1B	145171122	145171713	0.0254785	gi|222640294|gb|EEE68426.1|	0	hypothetical protein OsJ_26793 [Oryza sativa Japonica Group]
TCONS_00014782	1B	176284586	176285761	0.00119422	NA	NA	NA
TCONS_00014785	1B	176416376	176416893	0.0382071	gi|475615015|gb|EMT29296.1|	0	UDP-N-acetylmuramoyl-L-alanyl-D-glutamate--2, 6-diaminopimelate ligase [Aegilops tauschii]
TCONS_00014906	1B	180549735	180549931	0.0329465	gi|326490533|dbj|BAJ84930.1|	1.37e-98	predicted protein [Hordeum vulgare subsp. vulgare]
TCONS_00014938	1B	184046745	184048658	0.00673129	gi|592746790|gb|AHL43436.1|	1.67e-134	rhomboid [Triticum turgidum subsp. durum]
TCONS_00015030	1B	191233362	191233925	0.00980115	gi|326495180|dbj|BAJ85686.1|	0	predicted protein, partial [Hordeum vulgare subsp. vulgare]
TCONS_00015068	1B	191858607	191859009	1.03e-59	gi|326521868|dbj|BAK04062.1|	0	predicted protein [Hordeum vulgare subsp. vulgare]
TCONS_00015095	1B	193519151	193519811	0.0431834	gi|474152336|gb|EMS56995.1|	3.4e-70	putative glutathione S-transferase GSTU6 [Triticum urartu]
TCONS_00015120	1B	195906037	195906788	0.0126773	gi|149391259|gb|ABR25647.1|	1.43e-54	nucleoside diphosphate kinase 1 [Oryza sativa Indica Group]
TCONS_00015135	1B	196429391	196429780	0.0294334	gi|326510159|dbj|BAJ87296.1|	0	predicted protein [Hordeum vulgare subsp. vulgare]
TCONS_00015391	1B	214994867	214995672	0.0432351	gi|475614875|gb|EMT29226.1|	5.45e-142	RING finger protein 157 [Aegilops tauschii]
TCONS_00015498	1B	222058160	222058176	0.0276398	gi|474441225|gb|EMS68428.1|	1.83e-62	60S ribosomal protein L36-3 [Triticum urartu]
TCONS_00015706	1B	240726158	240727315	0.0204583	gi|475576762|gb|EMT17633.1|	1.19e-70	Mavicyanin [Aegilops tauschii]
TCONS_00015842	1B	248901268	248901903	0.0442166	gi|474072183|gb|EMS54387.1|	0	hypothetical protein TRIUR3_12933 [Triticum urartu]
TCONS_00015856	1B	250369762	250370438	0.0446112	gi|326527991|dbj|BAJ89047.1|	3.88e-73	predicted protein [Hordeum vulgare subsp. vulgare]
TCONS_00015940	1B	256996520	256997151	0.0257913	gi|473873559|gb|EMS47774.1|	1.8e-164	hypothetical protein TRIUR3_25380 [Triticum urartu]
TCONS_00015959	1B	258095091	258095606	0.0170268	gi|326501630|dbj|BAK02604.1|	0	predicted protein [Hordeum vulgare subsp. vulgare]
TCONS_00016124	1B	269118971	269119683	0.0344965	gi|33342178|dbj|BAC80266.1|	6.18e-80	ABA inducible protein [Triticum aestivum]
TCONS_00016162	1B	269288838	269289653	0.0127337	gi|926463769|gb|ALD18912.1|	7.02e-72	LEA3 [Triticum turgidum subsp. durum]
TCONS_00016165	1B	269520119	269520185	0.010385	gi|475627209|gb|EMT33594.1|	2.51e-50	hypothetical protein F775_27955 [Aegilops tauschii]
TCONS_00016232	1B	274737136	274737344	0.0371658	gi|326493336|dbj|BAJ85129.1|	0	predicted protein [Hordeum vulgare subsp. vulgare]
TCONS_00016301	1B	278375699	278375827	0.0312235	gi|475409579|gb|EMT00899.1|	2.14e-142	DNA replication complex GINS protein PSF2 [Aegilops tauschii]
TCONS_00016357	1B	281567087	281567532	0.0403898	gi|326530684|dbj|BAK01140.1|	4.21e-32	predicted protein [Hordeum vulgare subsp. vulgare]
TCONS_00016358	1B	281567142	281567532	0.0474997	gi|326530684|dbj|BAK01140.1|	8.55e-79	predicted protein [Hordeum vulgare subsp. vulgare]
TCONS_00016577	1B	289146130	289146598	0.0288423	gi|109716218|gb|ABG43091.1|	9.22e-138	histone deacetylase HDAC2 [Triticum aestivum]
TCONS_00016861	1B	51936935	51937852	0.0264929	NA	NA	NA
TCONS_00016900	1B	74359158	74360446	0.0294185	NA	NA	NA
TCONS_00017048	1B	153125570	153127743	0.0429063	gi|835993339|ref|XP_004972912.2|	3.61e-45	PREDICTED: uncharacterized protein LOC101779912, partial [Setaria italica]
TCONS_00017054	1B	158500642	158503527	0.0265347	gi|218194048|gb|EEC76475.1|	0	hypothetical protein OsI_14210 [Oryza sativa Indica Group]
TCONS_00017126	1B	197617501	197618584	0.02527	NA	NA	NA
TCONS_00017269	1B	259972061	259974208	0.0174172	gi|474373748|gb|EMS64032.1|	2.86e-11	hypothetical protein TRIUR3_18413 [Triticum urartu]
TCONS_00017288	1B	269099590	269100144	0.00120133	NA	NA	NA
TCONS_00017309	1B	274795531	274796460	0.0087585	gi|326534050|dbj|BAJ89375.1|	2.41e-56	predicted protein, partial [Hordeum vulgare subsp. vulgare]
TCONS_00017336	1B	280842293	280843345	0.0182635	gi|474438987|gb|EMS68336.1|	1.13e-104	putative calcium-binding protein CML45 [Triticum urartu]
TR140189_c0_g1_i2	1B	215244451	215246718	0.0254103	gi|474033205|gb|EMS53016.1|	8.79e-09	hypothetical protein TRIUR3_19797 [Triticum urartu]
TR148250_c1_g1_i2	1B	214945304	214953329	0.0435176	gi|326522522|dbj|BAK07723.1|	0	predicted protein [Hordeum vulgare subsp. vulgare]
TR150530_c0_g1_i3	1B	69342577	69343385	0.000184824	gi|474401911|gb|EMS66156.1|	5.66e-127	Transcription factor ASG4 [Triticum urartu]
TR151110_c2_g2_i2	1B	283077112	283078986	0.0344383	gi|326532324|dbj|BAK05091.1|	4.79e-81	predicted protein [Hordeum vulgare subsp. vulgare]
TR157551_c0_g1_i3	1B	141254884	141256408	0.00815613	gi|475600255|gb|EMT24485.1|	0	hypothetical protein F775_02677 [Aegilops tauschii]
TR164146_c0_g3_i3	1B	214111295	214115139	0.0359498	gi|473847412|gb|EMS47410.1|	0	Disease resistance RPP13-like protein 4 [Triticum urartu]
TR164426_c0_g1_i2	1B	18205127	18206243	0.00797673	gi|475620358|gb|EMT31079.1|	3.49e-56	Non-specific lipid-transfer protein-like protein [Aegilops tauschii]
TR164726_c1_g1_i9	1B	179734807	179737236	0.0140409	gi|475580220|gb|EMT18540.1|	3.04e-58	Putative protein phosphatase 2C 48 [Aegilops tauschii]
TR165033_c1_g1_i4	1B	160346507	160347839	0.0295925	gi|357146692|ref|XP_003574078.1|	6.58e-82	PREDICTED: transcription factor BTF3 homolog 4-like [Brachypodium distachyon]
TR170724_c2_g1_i1	1B	165327123	165328559	0.0134224	gi|475530770|gb|EMT07953.1|	9.88e-60	hypothetical protein F775_21580 [Aegilops tauschii]
TR174015_c0_g1_i2	1B	13813502	13816311	0.0231743	gi|475583306|gb|EMT19416.1|	0	Lectin-domain containing receptor kinase A4.2 [Aegilops tauschii]
TR175716_c0_g1_i1	1B	83224294	83226141	0.0470684	gi|326500554|dbj|BAK06366.1|	1.59e-44	predicted protein [Hordeum vulgare subsp. vulgare]
TR176778_c0_g1_i2	1B	209797483	209799031	0.015929	gi|473964586|gb|EMS51196.1|	0	Cation/H(+) antiporter 17 [Triticum urartu]
TR181844_c1_g1_i5	1B	211943164	211945732	0.0374575	gi|326498167|dbj|BAJ94946.1|	0	predicted protein [Hordeum vulgare subsp. vulgare]
TR191032_c0_g1_i1	1B	47152542	47153681	0.0402391	gi|475547393|gb|EMT10872.1|	0	Chitinase 2 [Aegilops tauschii]
TR195424_c1_g1_i1	1B	176660592	176663887	0.00278234	gi|326503478|dbj|BAJ86245.1|	3.74e-57	predicted protein [Hordeum vulgare subsp. vulgare]
TR205481_c1_g1_i1	1B	276490601	276492179	0.04803	gi|326523007|dbj|BAJ88549.1|	1.23e-75	predicted protein [Hordeum vulgare subsp. vulgare]
TR209114_c1_g1_i2	1B	5848416	5854850	0.0432207	gi|326499510|dbj|BAJ86066.1|	0	predicted protein [Hordeum vulgare subsp. vulgare]
TR209114_c1_g1_i3	1B	5848416	5854850	0.00165326	gi|326499510|dbj|BAJ86066.1|	0	predicted protein [Hordeum vulgare subsp. vulgare]
TR210489_c0_g1_i2	1B	182047189	182049850	0.0187284	gi|474218987|gb|EMS59150.1|	0	Eukaryotic peptide chain release factor subunit 1-2 [Triticum urartu]
TR212171_c0_g1_i4	1B	44757578	44759493	0.0434541	gi|475563479|gb|EMT14287.1|	0	Protein BRASSINOSTEROID INSENSITIVE 1 [Aegilops tauschii]
TR221162_c0_g1_i2	1B	227279575	227282509	0.0295364	gi|475581806|gb|EMT18948.1|	2.94e-84	hypothetical protein F775_28211 [Aegilops tauschii]
TR221162_c0_g1_i3	1B	227279575	227282509	0.0177657	gi|475581806|gb|EMT18948.1|	2.5e-91	hypothetical protein F775_28211 [Aegilops tauschii]
TR222930_c6_g4_i3	1B	2228407	2240621	0.0286996	gi|475581815|gb|EMT18952.1|	1.11e-13	hypothetical protein F775_05743 [Aegilops tauschii]
TR230244_c2_g2_i1	1B	244795747	244810464	0.0321777	gi|721674340|ref|XP_010237304.1|	5.57e-40	PREDICTED: helicase and polymerase-containing protein TEBICHI isoform X2 [Brachypodium distachyon]
TR230244_c2_g2_i2	1B	244795747	244810464	0.0204103	gi|475570536|gb|EMT16049.1|	3.42e-39	Helicase POLQ-like protein [Aegilops tauschii]
TR230244_c2_g2_i6	1B	244795747	244810464	0.0241686	gi|721674340|ref|XP_010237304.1|	3.28e-40	PREDICTED: helicase and polymerase-containing protein TEBICHI isoform X2 [Brachypodium distachyon]
TR230302_c2_g1_i5	1B	286609752	286610202	0.00288092	gi|475514270|gb|EMT05704.1|	9.77e-64	Putative WRKY transcription factor 41 [Aegilops tauschii]
TR230302_c2_g1_i8	1B	286609752	286610202	0.00139666	gi|189172037|gb|ACD80374.1|	2.91e-98	WRKY15 transcription factor, partial [Triticum aestivum]
TR231128_c0_g1_i1	1B	293339232	293342174	0.00519701	gi|473968077|gb|EMS51308.1|	7.24e-147	hypothetical protein TRIUR3_17822 [Triticum urartu]
TR231793_c0_g1_i6	1B	261660565	261662468	0.0276878	gi|238802278|emb|CAP74530.1|	2.93e-67	putative TdS40 protein, partial [Triticum turgidum subsp. durum]
TR44872_c0_g1_i1	1B	23717398	23718226	0.0125271	gi|357155594|ref|XP_003577171.1|	0	PREDICTED: ankyrin repeat-containing protein At5g02620-like [Brachypodium distachyon]
TR77860_c0_g1_i1	1B	116471019	116471952	0.0153177	gi|326491887|dbj|BAJ98168.1|	1.31e-30	predicted protein [Hordeum vulgare subsp. vulgare]
TR79917_c0_g1_i1	1B	31141946	31146628	0.00115334	gi|475541527|gb|EMT09794.1|	0	Beta-amylase [Aegilops tauschii]
TR95504_c0_g1_i3	1B	111974827	111980231	0.0196307	gi|474049270|gb|EMS53606.1|	0	Disease resistance protein RPP13 [Triticum urartu]
TCONS_00017754	1D	15260727	15260929	0.00861889	gi|474185747|gb|EMS57885.1|	3.66e-10	hypothetical protein TRIUR3_21470 [Triticum urartu]
TCONS_00017860	1D	19942678	19942771	0.0460494	gi|475582845|gb|EMT19261.1|	3.56e-09	Putative glycosyl hydrolase [Aegilops tauschii]
TCONS_00017955	1D	30764458	30764691	0.0314111	NA	NA	NA
TCONS_00018244	1D	43486309	43486390	0.0430814	gi|751663095|gb|AJF98629.1|	0	shikimate kinase [Triticum aestivum]
TCONS_00018289	1D	47638267	47638598	0.0379344	gi|475621673|gb|EMT31573.1|	8.42e-165	Ribonuclease 1 [Aegilops tauschii]
TCONS_00018363	1D	54204786	54206271	0.0181768	gi|475544456|gb|EMT10331.1|	0	Group XV phospholipase A2 [Aegilops tauschii]
TCONS_00018367	1D	54314626	54316951	0.0231529	gi|475604019|gb|EMT25602.1|	3.21e-40	F-box/WD-40 repeat-containing protein [Aegilops tauschii]
TCONS_00018672	1D	67348465	67348949	0.0442717	gi|326534300|dbj|BAJ89500.1|	0	predicted protein [Hordeum vulgare subsp. vulgare]
TCONS_00019117	1D	91966175	91966271	0.041874	gi|301508493|gb|ADK78215.1|	0	methionine aminopeptiase [Hordeum vulgare]
TCONS_00019317	1D	100771724	100771765	0.0100936	gi|475562885|gb|EMT14158.1|	0	Putative LRR receptor-like serine/threonine-protein kinase [Aegilops tauschii]
TCONS_00019343	1D	101482202	101482238	0.0111722	gi|475577534|gb|EMT17836.1|	2.54e-128	Putative acetyltransferase NSI [Aegilops tauschii]
TCONS_00019409	1D	105953217	105955857	0.0278566	gi|475604847|gb|EMT25859.1|	0	Putative serine/threonine-protein kinase receptor [Aegilops tauschii]
TCONS_00019762	1D	121670556	121671075	0.0272042	gi|632800122|gb|AHZ35571.1|	6.62e-53	LEA protein [Triticum aestivum]
TCONS_00019801	1D	123894132	123894425	0.0396709	gi|474022535|gb|EMS52917.1|	3.68e-91	Guanine nucleotide-binding protein subunit beta-like protein B [Triticum urartu]
TCONS_00019971	1D	131553967	131554624	0.00200899	gi|474042676|gb|EMS53319.1|	0	putative mitochondrial chaperone BCS1-B [Triticum urartu]
TCONS_00019999	1D	132541472	132541660	0.000352693	gi|473968077|gb|EMS51308.1|	8.52e-158	hypothetical protein TRIUR3_17822 [Triticum urartu]
TCONS_00020000	1D	132541472	132541660	0.0306049	gi|473968077|gb|EMS51308.1|	0	hypothetical protein TRIUR3_17822 [Triticum urartu]
TCONS_00020138	1D	928870	928920	0.0226353	gi|357135103|ref|XP_003569151.1|	1.4e-48	PREDICTED: 50S ribosomal protein L28, chloroplastic [Brachypodium distachyon]
TCONS_00020222	1D	3260651	3261336	0.0333838	gi|474287472|gb|EMS61170.1|	9.15e-53	hypothetical protein TRIUR3_04358 [Triticum urartu]
TCONS_00020299	1D	6063057	6063469	0.0444203	gi|326491913|dbj|BAJ98181.1|	0	predicted protein [Hordeum vulgare subsp. vulgare]
TCONS_00020371	1D	11076598	11077166	0.00971918	gi|721640922|ref|XP_010231777.1|	0	PREDICTED: probable leucine-rich repeat receptor-like protein kinase At1g35710 [Brachypodium distachyon]
TCONS_00020714	1D	33199686	33200506	0.0391185	gi|326495574|dbj|BAJ85883.1|	0	predicted protein [Hordeum vulgare subsp. vulgare]
TCONS_00021140	1D	59740895	59741396	0.0332859	gi|475546902|gb|EMT10774.1|	0	hypothetical protein F775_06822 [Aegilops tauschii]
TCONS_00021399	1D	79621096	79621841	0.0371095	gi|326510875|dbj|BAJ91785.1|	0	predicted protein [Hordeum vulgare subsp. vulgare]
TCONS_00021444	1D	83498870	83498935	0.0431538	gi|226500850|ref|NP_001142204.1|	1.56e-121	hypothetical protein [Zea mays]
TCONS_00021523	1D	88022411	88022430	0.000770264	gi|222640294|gb|EEE68426.1|	1.68e-87	hypothetical protein OsJ_26793 [Oryza sativa Japonica Group]
TCONS_00021793	1D	105923389	105928657	0.041515	gi|474166738|gb|EMS57450.1|	3.99e-09	Protein ODORANT1 [Triticum urartu]
TCONS_00021976	1D	114265019	114265648	0.0184489	gi|475385936|gb|EMT00677.1|	3.25e-143	hypothetical protein F775_09121 [Aegilops tauschii]
TCONS_00022459	1D	132506493	132507029	0.0160473	gi|475616548|gb|EMT29803.1|	0	Putative mitochondrial chaperone BCS1-B [Aegilops tauschii]
TCONS_00022474	1D	132953183	132953523	0.00229737	gi|357141264|ref|XP_003572159.1|	0	PREDICTED: phosphoglucan phosphatase LSF1, chloroplastic [Brachypodium distachyon]
TCONS_00022549	1D	134345343	134345701	0.00223748	gi|475594532|gb|EMT22712.1|	0	Putative LRR receptor-like serine/threonine-protein kinase [Aegilops tauschii]
TCONS_00022745	1D	66370327	66370769	0.0316012	NA	NA	NA
TCONS_00022798	1D	82143893	82144626	0.0287788	NA	NA	NA
TCONS_00022872	1D	104107014	104110530	0.00158046	gi|77552430|gb|ABA95227.1|	3.57e-35	retrotransposon protein, putative, unclassified [Oryza sativa Japonica Group]
TCONS_00022885	1D	107004600	107004987	0.0141903	NA	NA	NA
TCONS_00023009	1D	127155688	127156393	0.0138627	NA	NA	NA
TR124356_c0_g1_i1	1D	133639501	133651942	0.0163552	gi|253721999|gb|ACT34068.1|	3.1e-08	hypothetical protein [Aegilops tauschii]
TR141761_c0_g2_i1	1D	114606454	114607906	0.0420116	gi|474438412|gb|EMS68283.1|	4.24e-17	Disease resistance protein RGA2 [Triticum urartu]
TR151227_c0_g1_i2	1D	108981156	108982418	0.0382269	gi|474072183|gb|EMS54387.1|	0	hypothetical protein TRIUR3_12933 [Triticum urartu]
TR151596_c1_g1_i2	1D	93818790	93820691	0.000136435	gi|475563432|gb|EMT14278.1|	8.22e-76	Cysteine-rich receptor-like protein kinase 10 [Aegilops tauschii]
TR151596_c1_g1_i3	1D	93818790	93820691	0.009879	gi|326522921|dbj|BAJ88506.1|	4.55e-133	predicted protein [Hordeum vulgare subsp. vulgare]
TR171658_c2_g5_i5	1D	80852235	80855181	0.00386991	gi|475586126|gb|EMT20231.1|	3.96e-160	Cysteine-rich receptor-like protein kinase 10 [Aegilops tauschii]
TR172550_c1_g1_i2	1D	6916565	6918124	0.0333122	gi|297723627|ref|NP_001174177.1|	0	Os05g0112101 [Oryza sativa Japonica Group]
TR177206_c1_g2_i7	1D	118900263	118900946	0.0367653	gi|514747682|ref|XP_004961427.1|	0	PREDICTED: anthocyanidin 5,3-O-glucosyltransferase-like [Setaria italica]
TR178751_c0_g2_i3	1D	65522309	65523238	0.00676766	gi|475553596|gb|EMT12056.1|	8.99e-32	hypothetical protein F775_43762 [Aegilops tauschii]
TR183458_c2_g1_i3	1D	22598296	22607033	0.0296464	gi|357111198|ref|XP_003557401.1|	0	PREDICTED: probable Xaa-Pro aminopeptidase P isoform X1 [Brachypodium distachyon]
TR185200_c0_g1_i1	1D	117533270	117534157	0.0215415	gi|475576011|gb|EMT17427.1|	1.76e-151	Caffeic acid 3-O-methyltransferase [Aegilops tauschii]
TR185531_c3_g1_i1	1D	80790173	80793766	0.0291418	gi|474382278|gb|EMS64694.1|	1.05e-135	hypothetical protein TRIUR3_17796 [Triticum urartu]
TR185603_c0_g1_i1	1D	59740895	59743632	0.0385627	gi|474113455|gb|EMS55736.1|	0	hypothetical protein TRIUR3_30853 [Triticum urartu]
TR189200_c3_g1_i2	1D	14745255	14759701	0.0129218	gi|326500234|dbj|BAK06206.1|	0	predicted protein [Hordeum vulgare subsp. vulgare]
TR198898_c4_g1_i1	1D	734526	736971	0.0488431	gi|475611423|gb|EMT28076.1|	2.29e-46	Secologanin synthase [Aegilops tauschii]
TR203944_c1_g1_i1	1D	124195148	124195615	0.0260076	gi|720049975|ref|XP_010271616.1|	1.76e-29	PREDICTED: ubiquitin-60S ribosomal protein L40-like [Nelumbo nucifera]
TR205847_c6_g1_i2	1D	36437125	36440198	0.00908349	gi|326522570|dbj|BAK07747.1|	0	predicted protein, partial [Hordeum vulgare subsp. vulgare]
TR205847_c6_g1_i4	1D	36437125	36440198	0.018584	gi|326522570|dbj|BAK07747.1|	0	predicted protein, partial [Hordeum vulgare subsp. vulgare]
TR205847_c6_g1_i5	1D	36437125	36440198	0.00961475	gi|326522570|dbj|BAK07747.1|	0	predicted protein, partial [Hordeum vulgare subsp. vulgare]
TR209885_c0_g1_i1	1D	10399	13488	0.0389307	gi|475591616|gb|EMT21814.1|	3.16e-156	Charged multivesicular body protein 5 [Aegilops tauschii]
TR214246_c1_g1_i1	1D	130978170	130979826	0.00306775	gi|475525323|gb|EMT07146.1|	5.49e-19	hypothetical protein F775_30207 [Aegilops tauschii]
TR214246_c1_g1_i4	1D	130978170	130979826	0.041	gi|827354784|gb|AKJ77985.1|	2.82e-40	ElF1 superfamily transcriptions factor [Triticum aestivum]
TR226244_c1_g2_i5	1D	26025449	26027694	0.0493853	gi|326495180|dbj|BAJ85686.1|	0	predicted protein, partial [Hordeum vulgare subsp. vulgare]
TR227111_c1_g8_i1	1D	12660908	12664749	0.0344257	gi|473744818|gb|EMS45475.1|	3.99e-16	hypothetical protein TRIUR3_25412 [Triticum urartu]
TR230463_c1_g1_i2	1D	3016954	3019108	0.0153651	gi|326501868|dbj|BAK06426.1|	0	predicted protein [Hordeum vulgare subsp. vulgare]
TR238545_c0_g1_i1	1D	93818790	93820691	0.00877377	gi|475565066|gb|EMT14692.1|	2.96e-152	Cysteine-rich receptor-like protein kinase 25 [Aegilops tauschii]
TR32495_c0_g1_i1	1D	7042148	7045046	0.0187336	gi|475611581|gb|EMT28136.1|	1.87e-25	Phenylalanine ammonia-lyase [Aegilops tauschii]
TR95687_c1_g1_i1	1D	953191	953409	0.0195839	gi|475524390|gb|EMT07012.1|	7.41e-27	hypothetical protein F775_42741 [Aegilops tauschii]
TCONS_00023145	2A	1937415	1940801	0.0150422	gi|125491395|gb|ABN43184.1|	1.35e-31	WRKY transcription factor [Triticum aestivum]
TCONS_00023186	2A	2838542	2838742	0.025311	gi|326494510|dbj|BAJ90524.1|	1.37e-107	predicted protein [Hordeum vulgare subsp. vulgare]
TCONS_00023192	2A	2923916	2923968	0.0166261	gi|721696362|ref|XP_010240705.1|	0	PREDICTED: putative disease resistance protein RGA3 [Brachypodium distachyon]
TCONS_00023270	2A	4620688	4620710	0.0204584	NA	NA	NA
TCONS_00023299	2A	5660860	5660892	0.00289258	gi|326523271|dbj|BAJ88676.1|	2.11e-75	predicted protein [Hordeum vulgare subsp. vulgare]
TCONS_00023301	2A	5812028	5812387	0.0485368	gi|326528371|dbj|BAJ93367.1|	0	predicted protein [Hordeum vulgare subsp. vulgare]
TCONS_00023342	2A	7019529	7019830	0.000570223	gi|474373826|gb|EMS64057.1|	1.61e-137	hypothetical protein TRIUR3_02361 [Triticum urartu]
TCONS_00023343	2A	7039734	7040651	0.00779444	gi|134102|sp|P08823.1|RUBA_WHEAT	0	RecName: Full=RuBisCO large subunit-binding protein subunit alpha, chloroplastic; AltName: Full=60 kDa chaperonin subunit alpha; AltName: Full=CPN-60 alpha; Flags: Precursor
TCONS_00023417	2A	9331823	9335293	0.00765457	gi|475591668|gb|EMT21841.1|	0	Putative LRR receptor-like serine/threonine-protein kinase [Aegilops tauschii]
TCONS_00023422	2A	9636899	9640529	0.0248962	gi|475591664|gb|EMT21837.1|	0	Putative LRR receptor-like serine/threonine-protein kinase [Aegilops tauschii]
TCONS_00023442	2A	10266155	10267729	0.0289532	gi|475518703|gb|EMT06233.1|	2.18e-155	Putative amidase [Aegilops tauschii]
TCONS_00023456	2A	10567650	10567674	0.0313264	gi|326523239|dbj|BAJ88660.1|	2.63e-145	predicted protein [Hordeum vulgare subsp. vulgare]
TCONS_00023466	2A	10653100	10653378	0.033873	gi|326513886|dbj|BAJ87961.1|	1.31e-94	predicted protein [Hordeum vulgare subsp. vulgare]
TCONS_00023504	2A	12270054	12270174	0.0320306	gi|357121371|ref|XP_003562394.1|	9.38e-157	PREDICTED: required for meiotic nuclear division protein 1 homolog [Brachypodium distachyon]
TCONS_00023616	2A	14679610	14680985	0.00397706	gi|326506366|dbj|BAJ86501.1|	0	predicted protein [Hordeum vulgare subsp. vulgare]
TCONS_00023618	2A	14695979	14697104	0.0330614	gi|944080211|gb|KQK15563.1|	6.77e-76	hypothetical protein BRADI_1g23690 [Brachypodium distachyon]
TCONS_00023716	2A	19674645	19674868	0.00253046	gi|326495664|dbj|BAJ85928.1|	2.38e-151	predicted protein [Hordeum vulgare subsp. vulgare]
TCONS_00023773	2A	22633325	22633493	0.0218084	gi|242073352|ref|XP_002446612.1|	1.58e-111	hypothetical protein SORBIDRAFT_06g018930 [Sorghum bicolor]
TCONS_00023893	2A	31657003	31657110	0.0184481	gi|474124510|gb|EMS56147.1|	0	Vacuolar-processing enzyme [Triticum urartu]
TCONS_00024185	2A	56916966	56917101	0.0402512	gi|475482840|gb|EMT03005.1|	0	ERD1 protein, chloroplastic [Aegilops tauschii]
TCONS_00024188	2A	57052199	57052629	0.047563	gi|475626677|gb|EMT33436.1|	1.77e-175	hypothetical protein F775_26102 [Aegilops tauschii]
TCONS_00024274	2A	60574856	60575565	0.00439487	gi|475565000|gb|EMT14673.1|	6.89e-156	hypothetical protein F775_05422 [Aegilops tauschii]
TCONS_00024439	2A	70657550	70657603	0.00627345	gi|475591104|gb|EMT21653.1|	0	Putative PAP-specific phosphatase, mitochondrial [Aegilops tauschii]
TCONS_00024585	2A	86388397	86389408	0.00365466	gi|475565001|gb|EMT14674.1|	3.4e-129	Methyltransferase-like protein 13 [Aegilops tauschii]
TCONS_00024728	2A	97625844	97626102	0.0325782	gi|326514680|dbj|BAJ99701.1|	0	predicted protein [Hordeum vulgare subsp. vulgare]
TCONS_00025018	2A	119261716	119261961	0.00410265	gi|475583358|gb|EMT19430.1|	1.93e-66	Cytochrome c6, chloroplastic [Aegilops tauschii]
TCONS_00025401	2A	148087409	148087477	0.022253	gi|474406375|gb|EMS66514.1|	4.97e-92	hypothetical protein TRIUR3_34358 [Triticum urartu]
TCONS_00025426	2A	150986178	150986589	0.00458331	gi|326494228|dbj|BAJ90383.1|	4.48e-58	predicted protein [Hordeum vulgare subsp. vulgare]
TCONS_00025509	2A	153585538	153586007	0.0433653	gi|475545939|gb|EMT10572.1|	2.81e-55	10 kDa chaperonin [Aegilops tauschii]
TCONS_00025556	2A	156169249	156169487	0.0460376	gi|475561517|gb|EMT13790.1|	0	Glucose-6-phosphate/phosphate translocator 2, chloroplastic [Aegilops tauschii]
TCONS_00025577	2A	159793205	159793292	0.0218825	gi|473869072|gb|EMS47681.1|	6.03e-115	Septum-promoting GTP-binding protein 1 [Triticum urartu]
TCONS_00025645	2A	166994002	166994292	0.0397507	gi|357147907|ref|XP_003574539.1|	0	PREDICTED: omega-6 fatty acid desaturase, chloroplastic [Brachypodium distachyon]
TCONS_00025647	2A	166994414	166994462	0.0391637	gi|357147907|ref|XP_003574539.1|	4.53e-126	PREDICTED: omega-6 fatty acid desaturase, chloroplastic [Brachypodium distachyon]
TCONS_00025697	2A	171220513	171221054	0.0327035	gi|474042764|gb|EMS53331.1|	3.82e-20	hypothetical protein TRIUR3_13102 [Triticum urartu]
TCONS_00025900	2A	187392473	187392506	0.0110131	gi|326516130|dbj|BAJ88088.1|	4.33e-116	predicted protein [Hordeum vulgare subsp. vulgare]
TCONS_00025917	2A	188564801	188565221	0.0211619	gi|326521474|dbj|BAK00313.1|	1.99e-131	predicted protein [Hordeum vulgare subsp. vulgare]
TCONS_00026110	2A	205113915	205114219	0.0332633	gi|721693605|ref|XP_010240262.1|	0	PREDICTED: Niemann-Pick C1 protein isoform X1 [Brachypodium distachyon]
TCONS_00026178	2A	207947323	207950843	0.0165215	gi|721692026|ref|XP_010240028.1|	0	PREDICTED: pentatricopeptide repeat-containing protein At5g48910-like [Brachypodium distachyon]
TCONS_00026356	2A	217454573	217455190	0.0318503	gi|475557577|gb|EMT12871.1|	0	hypothetical protein F775_12152 [Aegilops tauschii]
TCONS_00026439	2A	222251497	222252538	0.0122384	gi|475556999|gb|EMT12741.1|	0	Wall-associated receptor kinase 5 [Aegilops tauschii]
TCONS_00026487	2A	223082974	223083945	0.00130683	gi|326496240|dbj|BAJ94582.1|	0	predicted protein [Hordeum vulgare subsp. vulgare]
TCONS_00026517	2A	223741282	223741822	0.0302711	gi|326525417|dbj|BAK00693.1|	1.16e-75	predicted protein [Hordeum vulgare subsp. vulgare]
TCONS_00026526	2A	223905825	223905925	0.0407439	gi|475505415|gb|EMT04717.1|	4.63e-152	Synaptic vesicle 2-related protein [Aegilops tauschii]
TCONS_00026548	2A	225248619	225248728	0.0375298	gi|475613193|gb|EMT28681.1|	7.33e-103	33 kDa ribonucleoprotein, chloroplastic [Aegilops tauschii]
TCONS_00026658	2A	229265632	229265692	0.0159706	gi|473906617|gb|EMS49396.1|	0	hypothetical protein TRIUR3_14631 [Triticum urartu]
TCONS_00026737	2A	232045256	232045944	0.0204223	gi|475485776|gb|EMT03202.1|	2.23e-54	hypothetical protein F775_01514 [Aegilops tauschii]
TCONS_00026879	2A	236448391	236448790	0.0478968	gi|121483256|gb|ABM54074.1|	0	GTP cyclohydrolase 1 isoform TaA [Triticum aestivum]
TCONS_00026891	2A	236681429	236681636	0.0350032	gi|475517415|gb|EMT06093.1|	5.5e-75	Protein CutA 1, chloroplastic [Aegilops tauschii]
TCONS_00027037	2A	241316914	241317025	0.0103037	gi|357166288|ref|XP_003580661.1|	0	PREDICTED: glutamyl-tRNA(Gln) amidotransferase subunit A, chloroplastic/mitochondrial [Brachypodium distachyon]
TCONS_00027153	2A	245087947	245088143	0.0065098	gi|475487000|gb|EMT03270.1|	5.78e-66	hypothetical protein F775_32363 [Aegilops tauschii]
TCONS_00027177	2A	245874824	245875779	0.0143448	gi|326508702|dbj|BAJ95873.1|	4.53e-74	predicted protein [Hordeum vulgare subsp. vulgare]
TCONS_00027192	2A	246409507	246410102	0.000971253	gi|326516776|dbj|BAJ96380.1|	4.9e-59	predicted protein [Hordeum vulgare subsp. vulgare]
TCONS_00027246	2A	248370388	248370758	0.0160735	gi|475522726|gb|EMT06798.1|	0	Cyclopropane-fatty-acyl-phospholipid synthase [Aegilops tauschii]
TCONS_00027384	2A	252801683	252802036	0.0375839	gi|475611106|gb|EMT27976.1|	6.42e-12	hypothetical protein F775_43817 [Aegilops tauschii]
TCONS_00027445	2A	17165	17602	0.0331589	gi|475559762|gb|EMT13420.1|	0	hypothetical protein F775_07416 [Aegilops tauschii]
TCONS_00027457	2A	17165	17334	0.00358443	gi|474128115|gb|EMS56299.1|	0	Polycomb group protein EMBRYONIC FLOWER 2 [Triticum urartu]
TCONS_00027539	2A	2605154	2605565	0.017909	gi|326523637|dbj|BAJ92989.1|	3.4e-155	predicted protein [Hordeum vulgare subsp. vulgare]
TCONS_00027547	2A	2693091	2694459	0.0119691	gi|474403284|gb|EMS66283.1|	0	hypothetical protein TRIUR3_34472 [Triticum urartu]
TCONS_00027548	2A	2712296	2712932	0.0420655	gi|475608139|gb|EMT26935.1|	0	Putative cysteine-rich receptor-like protein kinase 23 [Aegilops tauschii]
TCONS_00027637	2A	4948057	4949812	2.45e-05	gi|473904586|gb|EMS49294.1|	0	Cysteine-rich receptor-like protein kinase 41 [Triticum urartu]
TCONS_00027711	2A	7133944	7136049	0.00229425	gi|115457186|ref|NP_001052193.1|	0	Os04g0185600 [Oryza sativa Japonica Group]
TCONS_00027764	2A	8853555	8855763	0.0413194	gi|475618045|gb|EMT30321.1|	0	Cytokinin-O-glucosyltransferase 3 [Aegilops tauschii]
TCONS_00027866	2A	13316412	13317061	0.0251969	gi|475571656|gb|EMT16313.1|	0	Serine/threonine-protein kinase PBS1 [Aegilops tauschii]
TCONS_00028031	2A	20267308	20269773	0.0107511	NA	NA	NA
TCONS_00028048	2A	21175332	21175662	0.0410343	NA	NA	NA
TCONS_00028126	2A	27768059	27769306	7.93e-05	gi|475546351|gb|EMT10667.1|	2.41e-32	hypothetical protein F775_27842 [Aegilops tauschii]
TCONS_00028471	2A	54297785	54297961	0.024499	gi|359828747|gb|AEV76976.1|	1.35e-142	cis-zeatin O-glucosyltransferase 1 [Triticum aestivum]
TCONS_00028476	2A	54468378	54468792	0.0300693	gi|475615632|gb|EMT29507.1|	0	ZZ-type zinc finger-containing protein [Aegilops tauschii]
TCONS_00028482	2A	54614479	54614813	0.0495055	gi|357163778|ref|XP_003579843.1|	4.08e-112	PREDICTED: uncharacterized protein LOC100829661 [Brachypodium distachyon]
TCONS_00028486	2A	54614479	54614813	0.0197707	gi|475477757|gb|EMT02697.1|	3.26e-142	hypothetical protein F775_01357 [Aegilops tauschii]
TCONS_00028487	2A	54758107	54758604	0.00588802	gi|474060266|gb|EMS53951.1|	0	MATE efflux family protein 5 [Triticum urartu]
TCONS_00028506	2A	57026544	57027400	0.0466115	gi|47680447|gb|AAT37168.1|	5.38e-88	transcription factor Myb2 [Triticum aestivum]
TCONS_00028670	2A	68559518	68559663	0.0289878	gi|475602408|gb|EMT25124.1|	7.79e-06	hypothetical protein F775_24471 [Aegilops tauschii]
TCONS_00028823	2A	78104796	78107765	0.026728	gi|326490620|dbj|BAJ89977.1|	0	predicted protein [Hordeum vulgare subsp. vulgare]
TCONS_00028833	2A	78752110	78754567	0.0145358	gi|475544185|gb|EMT10278.1|	1.4e-18	Heat shock protein STI [Aegilops tauschii]
TCONS_00028887	2A	81331528	81332065	0.00757944	gi|326534114|dbj|BAJ89407.1|	0	predicted protein, partial [Hordeum vulgare subsp. vulgare]
TCONS_00029006	2A	89370251	89371344	0.00715723	gi|115349892|gb|ABI95394.1|	2.33e-100	fasciclin-like protein FLA4 [Triticum aestivum]
TCONS_00029087	2A	96773758	96774073	1.59e-05	gi|475436774|gb|EMT01329.1|	2.73e-30	hypothetical protein F775_18671 [Aegilops tauschii]
TCONS_00029133	2A	98881083	98883443	0.00224958	gi|944047107|gb|KQJ82748.1|	0	hypothetical protein BRADI_5g10787 [Brachypodium distachyon]
TCONS_00029159	2A	100591001	100591600	0.0344223	gi|326530304|dbj|BAJ97578.1|	0	predicted protein [Hordeum vulgare subsp. vulgare]
TCONS_00029500	2A	131660745	131661273	0.0107312	gi|475604702|gb|EMT25817.1|	0	Cysteine-rich receptor-like protein kinase 8 [Aegilops tauschii]
TCONS_00029777	2A	152623619	152623953	0.047669	gi|721669450|ref|XP_010236290.1|	5.69e-18	PREDICTED: uncharacterized protein LOC104583946 [Brachypodium distachyon]
TCONS_00029844	2A	154163792	154164041	0.000491874	gi|474449612|gb|EMS68782.1|	5.74e-75	hypothetical protein TRIUR3_16388 [Triticum urartu]
TCONS_00029985	2A	162777152	162777657	0.034899	gi|326523213|dbj|BAJ88647.1|	3.16e-180	predicted protein, partial [Hordeum vulgare subsp. vulgare]
TCONS_00029988	2A	162777152	162777657	0.00447479	gi|326523213|dbj|BAJ88647.1|	0	predicted protein, partial [Hordeum vulgare subsp. vulgare]
TCONS_00030025	2A	165806415	165808851	0.0186375	gi|474103472|gb|EMS55342.1|	0	L-type lectin-domain containing receptor kinase IV.1 [Triticum urartu]
TCONS_00030058	2A	166665740	166666863	0.025839	gi|84795222|gb|ABC65847.1|	4.36e-135	WRKY transcription factor WRKY1B [Triticum aestivum]
TCONS_00030395	2A	195647346	195648766	0.043114	gi|326490946|dbj|BAJ90140.1|	4.07e-129	predicted protein [Hordeum vulgare subsp. vulgare]
TCONS_00030643	2A	212941690	212942670	0.0102801	NA	NA	NA
TCONS_00031091	2A	233287073	233287676	0.0376834	gi|473874803|gb|EMS47829.1|	1.02e-79	hypothetical protein TRIUR3_30794 [Triticum urartu]
TCONS_00031118	2A	234186976	234188122	0.036429	gi|326527783|dbj|BAJ88964.1|	0	predicted protein [Hordeum vulgare subsp. vulgare]
TCONS_00031139	2A	235055150	235055577	0.0145291	gi|474119983|gb|EMS56031.1|	9.75e-147	hypothetical protein TRIUR3_17933 [Triticum urartu]
TCONS_00031146	2A	235138024	235138342	0.0195314	gi|326515456|dbj|BAK03641.1|	0	predicted protein [Hordeum vulgare subsp. vulgare]
TCONS_00031174	2A	235833822	235834331	0.0455927	gi|326505728|dbj|BAJ95535.1|	0	predicted protein [Hordeum vulgare subsp. vulgare]
TCONS_00031213	2A	237691061	237691406	0.0187581	gi|475550486|gb|EMT11457.1|	0	Putative serine/threonine-protein kinase receptor [Aegilops tauschii]
TCONS_00031221	2A	237747495	237747720	0.0401845	gi|474383288|gb|EMS64730.1|	9.58e-43	Vacuolar cation/proton exchanger 3 [Triticum urartu]
TCONS_00031324	2A	239708444	239708559	0.0154397	gi|475619434|gb|EMT30777.1|	1.04e-89	Wall-associated receptor kinase-like protein 2 [Aegilops tauschii]
TCONS_00031508	2A	247099397	247099962	0.0098315	gi|474202252|gb|EMS58564.1|	0	Receptor-like serine/threonine-protein kinase SD1-8 [Triticum urartu]
TCONS_00031516	2A	247123759	247124309	0.00684619	gi|326507280|dbj|BAJ95717.1|	0	predicted protein [Hordeum vulgare subsp. vulgare]
TCONS_00031636	2A	250530299	250531496	0.00295933	gi|475587114|gb|EMT20459.1|	1.72e-75	30S ribosomal protein S17, chloroplastic [Aegilops tauschii]
TCONS_00031701	2A	252055274	252056061	0.0465316	gi|474368090|gb|EMS63656.1|	0	NAC domain-containing protein 7 [Triticum urartu]
TCONS_00031893	2A	22584816	22585988	0.00511661	NA	NA	NA
TCONS_00031899	2A	26326046	26328015	0.00263593	gi|475461095|gb|EMT02043.1|	1.88e-13	Sulfotransferase 17 [Aegilops tauschii]
TCONS_00031945	2A	43241484	43242919	0.0392039	NA	NA	NA
TCONS_00031975	2A	59328283	59329586	0.0458244	NA	NA	NA
TCONS_00032168	2A	142314105	142316091	0.0420655	gi|474221862|gb|EMS59297.1|	1.28e-129	hypothetical protein TRIUR3_26838 [Triticum urartu]
TCONS_00032237	2A	166790826	166795270	0.0264354	gi|475623926|gb|EMT32417.1|	6.33e-22	hypothetical protein F775_24208 [Aegilops tauschii]
TCONS_00032401	2A	226810569	226811168	0.000985698	gi|475556794|gb|EMT12703.1|	2.39e-25	hypothetical protein F775_24550 [Aegilops tauschii]
TCONS_00032542	2A	253167439	253169239	9.69e-05	gi|326487472|dbj|BAJ89720.1|	2.34e-138	predicted protein [Hordeum vulgare subsp. vulgare]
TR124284_c0_g1_i2	2A	240930015	240931705	0.0379099	gi|475512695|gb|EMT05513.1|	1.32e-95	Peroxidase 52 [Aegilops tauschii]
TR148991_c1_g1_i1	2A	83764647	83771040	0.0109911	gi|721690246|ref|XP_010239802.1|	0	PREDICTED: uncharacterized protein LOC100821885 isoform X2 [Brachypodium distachyon]
TR158541_c0_g1_i3	2A	250730710	250733526	0.00846226	gi|514741722|ref|XP_004959963.1|	1.88e-15	PREDICTED: uncharacterized protein LOC101760650 [Setaria italica]
TR160929_c0_g1_i1	2A	200834222	200836503	0.000301322	gi|474015310|gb|EMS52665.1|	6.31e-15	Heat shock 70 kDa protein 4L [Triticum urartu]
TR160973_c0_g2_i2	2A	225248619	225250919	0.0168689	gi|475613193|gb|EMT28681.1|	7.76e-93	33 kDa ribonucleoprotein, chloroplastic [Aegilops tauschii]
TR165025_c5_g2_i1	2A	78756160	78758547	0.0234297	gi|475619395|gb|EMT30761.1|	0	Protein grpE [Aegilops tauschii]
TR172725_c0_g1_i1	2A	188965197	188966363	0.0194776	gi|326534362|dbj|BAJ89531.1|	1.09e-114	predicted protein [Hordeum vulgare subsp. vulgare]
TR180571_c1_g1_i1	2A	58913117	58913647	0.000431751	gi|944046490|gb|KQJ82131.1|	5.93e-16	hypothetical protein BRADI_5g06485 [Brachypodium distachyon]
TR181945_c0_g1_i1	2A	6646448	6652491	0.0439305	gi|357167127|ref|XP_003581016.1|	0	PREDICTED: ABC transporter G family member 24-like [Brachypodium distachyon]
TR181960_c2_g1_i1	2A	204235996	204241996	0.0115245	gi|474423617|gb|EMS67633.1|	8.47e-76	Disease resistance protein RPS2 [Triticum urartu]
TR185524_c0_g1_i1	2A	211551758	211552632	0.0131069	gi|475594815|gb|EMT22835.1|	1.7e-128	hypothetical protein F775_13417 [Aegilops tauschii]
TR192168_c5_g1_i2	2A	246926768	246928689	0.00861261	gi|326500918|dbj|BAJ95125.1|	3.27e-62	predicted protein [Hordeum vulgare subsp. vulgare]
TR192192_c2_g1_i3	2A	4948082	4951281	0.0059054	gi|475608139|gb|EMT26935.1|	5.86e-120	Putative cysteine-rich receptor-like protein kinase 23 [Aegilops tauschii]
TR192192_c2_g1_i8	2A	4948082	4951281	0.0393666	gi|473904586|gb|EMS49294.1|	3.38e-165	Cysteine-rich receptor-like protein kinase 41 [Triticum urartu]
TR197611_c2_g1_i2	2A	236676487	236678502	0.0491392	gi|475590524|gb|EMT21495.1|	1.17e-48	Disease resistance protein RPM1 [Aegilops tauschii]
TR197642_c3_g1_i16	2A	231930383	231937771	0.0244632	gi|326532710|dbj|BAJ89200.1|	0	predicted protein [Hordeum vulgare subsp. vulgare]
TR198928_c2_g1_i1	2A	73489691	73493584	0.0176	gi|475482841|gb|EMT03006.1|	2.01e-166	hypothetical protein F775_30606 [Aegilops tauschii]
TR205455_c0_g1_i3	2A	86000957	86005566	0.0159619	gi|473777511|gb|EMS45986.1|	1.24e-59	hypothetical protein TRIUR3_32080 [Triticum urartu]
TR205455_c0_g1_i5	2A	86000957	86005566	0.0474278	gi|473777511|gb|EMS45986.1|	4.43e-63	hypothetical protein TRIUR3_32080 [Triticum urartu]
TR206759_c1_g3_i5	2A	207272545	207277417	0.00727596	gi|326487494|dbj|BAJ89731.1|	6.49e-138	predicted protein [Hordeum vulgare subsp. vulgare]
TR208996_c2_g1_i1	2A	252888445	252892439	0.0172959	gi|475546501|gb|EMT10695.1|	3.34e-33	hypothetical protein F775_09892 [Aegilops tauschii]
TR208996_c4_g2_i11	2A	252884174	252887521	0.02091	gi|475546501|gb|EMT10695.1|	0	hypothetical protein F775_09892 [Aegilops tauschii]
TR211282_c1_g1_i1	2A	223697422	223700099	0.018979	gi|326522775|dbj|BAJ88433.1|	1.04e-160	predicted protein [Hordeum vulgare subsp. vulgare]
TR211614_c0_g1_i9	2A	154977690	154979131	0.0297463	gi|475552590|gb|EMT11815.1|	1.03e-119	Putative 4-coumarate--CoA ligase 5 [Aegilops tauschii]
TR212128_c0_g1_i2	2A	197268779	197276125	0.0238821	gi|326509081|dbj|BAJ86933.1|	1.65e-74	predicted protein [Hordeum vulgare subsp. vulgare]
TR215138_c1_g1_i3	2A	129225678	129233167	0.0417638	NA	NA	NA
TR215183_c0_g1_i1	2A	92301615	92302848	0.008605	gi|326496701|dbj|BAJ98377.1|	4.27e-176	predicted protein [Hordeum vulgare subsp. vulgare]
TR221934_c0_g1_i1	2A	26061968	26063546	0.0101322	gi|6136559|sp|O48609.1|RRP3_HORVU	1.58e-63	RecName: Full=30S ribosomal protein 3, chloroplastic; AltName: Full=Plastid-specific 30S ribosomal protein 3; Short=PSRP-3; Flags: Precursor
TR221934_c0_g1_i2	2A	26061968	26063546	0.0107047	gi|6136559|sp|O48609.1|RRP3_HORVU	2.02e-63	RecName: Full=30S ribosomal protein 3, chloroplastic; AltName: Full=Plastid-specific 30S ribosomal protein 3; Short=PSRP-3; Flags: Precursor
TR222347_c0_g1_i1	2A	168775963	168777990	0.0281439	gi|475578129|gb|EMT18019.1|	0	Lectin-domain containing receptor kinase A4.3 [Aegilops tauschii]
TR223066_c0_g3_i1	2A	7039734	7043193	0.0255602	gi|474113969|gb|EMS55766.1|	0	RuBisCO large subunit-binding protein subunit alpha, chloroplastic [Triticum urartu]
TR224424_c5_g4_i6	2A	221700585	221701076	0.0281562	gi|336245572|gb|AEI28608.1|	8.66e-47	hypothetical protein [Triticum aestivum]
TR226227_c0_g1_i7	2A	182031652	182034168	0.0273843	gi|326487151|dbj|BAJ89560.1|	0	predicted protein [Hordeum vulgare subsp. vulgare]
TR226666_c0_g1_i1	2A	89466379	89468318	0.00449177	gi|475611698|gb|EMT28181.1|	0	Putative polyol transporter 4 [Aegilops tauschii]
TR230111_c2_g1_i3	2A	83399516	83402168	0.045912	gi|475498744|gb|EMT04099.1|	4.3e-94	60S ribosomal protein L5-2 [Aegilops tauschii]
TR230137_c0_g1_i3	2A	76959748	76960917	0.032673	gi|474410931|gb|EMS66824.1|	3.18e-110	PsbP domain-containing protein 2, chloroplastic [Triticum urartu]
TR232569_c2_g1_i1	2A	127390647	127395254	0.028415	gi|474265540|gb|EMS60698.1|	0	Cysteine-rich receptor-like protein kinase 25 [Triticum urartu]
TR233490_c0_g1_i1	2A	153585538	153588124	0.0057829	gi|475545939|gb|EMT10572.1|	6.64e-61	10 kDa chaperonin [Aegilops tauschii]
TR238515_c3_g2_i1	2A	231451996	231453459	0.0282503	gi|475345360|gb|EMT00387.1|	7.78e-103	Fruit bromelain [Aegilops tauschii]
TR238515_c3_g2_i3	2A	231451996	231453459	0.0322276	gi|475345360|gb|EMT00387.1|	2.49e-152	Fruit bromelain [Aegilops tauschii]
TR77612_c0_g1_i1	2A	214672689	214673557	0.0345154	gi|357164311|ref|XP_003580015.1|	7.49e-27	PREDICTED: probable inactive receptor kinase At1g27190 [Brachypodium distachyon]
TR90285_c0_g1_i2	2A	250530299	250531496	0.0377726	gi|475587114|gb|EMT20459.1|	2.1e-79	30S ribosomal protein S17, chloroplastic [Aegilops tauschii]
TCONS_00032571	2B	775248	776691	0.0443622	gi|475525671|gb|EMT07187.1|	0	Phenylalanine ammonia-lyase [Aegilops tauschii]
TCONS_00032586	2B	1727743	1728020	0.00387803	NA	NA	NA
TCONS_00032607	2B	3236146	3238284	0.00362222	gi|326510347|dbj|BAJ87390.1|	0	predicted protein [Hordeum vulgare subsp. vulgare]
TCONS_00032856	2B	12170313	12172038	0.0182171	gi|475618045|gb|EMT30321.1|	0	Cytokinin-O-glucosyltransferase 3 [Aegilops tauschii]
TCONS_00032886	2B	13131978	13134352	0.00311609	gi|475618047|gb|EMT30323.1|	0	Putative LRR receptor-like serine/threonine-protein kinase [Aegilops tauschii]
TCONS_00032935	2B	16934817	16935790	0.000414794	gi|474443506|gb|EMS68496.1|	0	Premnaspirodiene oxygenase [Triticum urartu]
TCONS_00033161	2B	27222161	27222595	0.0328181	gi|475578795|gb|EMT18192.1|	2.28e-141	Putative WRKY transcription factor 70 [Aegilops tauschii]
TCONS_00033234	2B	31772027	31772430	0.00367413	gi|475594802|gb|EMT22828.1|	1.93e-157	Two-component response regulator ARR2 [Aegilops tauschii]
TCONS_00033465	2B	44727261	44728752	0.0343118	gi|326491217|dbj|BAK05708.1|	0	predicted protein [Hordeum vulgare subsp. vulgare]
TCONS_00033534	2B	47407360	47408024	0.00232566	gi|475549406|gb|EMT11253.1|	0	hypothetical protein F775_26303 [Aegilops tauschii]
TCONS_00033588	2B	51678002	51678031	0.030768	gi|357134179|ref|XP_003568695.1|	1.95e-157	PREDICTED: protein SSUH2 homolog isoform X1 [Brachypodium distachyon]
TCONS_00033668	2B	57477968	57479194	0.0110799	gi|475496928|gb|EMT03949.1|	1.17e-110	hypothetical protein F775_05807 [Aegilops tauschii]
TCONS_00033696	2B	59135614	59136024	0.0479953	gi|84795220|gb|ABC65846.1|	3.45e-180	WRKY transcription factor WRKY1A [Triticum aestivum]
TCONS_00033738	2B	60582863	60582884	0.0282092	gi|357121651|ref|XP_003562531.1|	0	PREDICTED: thioredoxin reductase NTRC [Brachypodium distachyon]
TCONS_00033742	2B	60618760	60621649	0.00629655	gi|115473825|ref|NP_001060511.1|	0	Os07g0657400 [Oryza sativa Japonica Group]
TCONS_00033747	2B	61360719	61360838	0.0464384	gi|564732312|gb|AHC00227.1|	0	SNF1-type serine-threonine protein kinase [Triticum polonicum]
TCONS_00033849	2B	65528152	65528631	0.00703957	gi|326487151|dbj|BAJ89560.1|	0	predicted protein [Hordeum vulgare subsp. vulgare]
TCONS_00033889	2B	68914349	68917941	0.00347391	gi|326510243|dbj|BAJ87338.1|	0	predicted protein [Hordeum vulgare subsp. vulgare]
TCONS_00033911	2B	71783452	71783700	0.00211555	gi|474438361|gb|EMS68279.1|	0	RuBisCO large subunit-binding protein subunit beta, chloroplastic [Triticum urartu]
TCONS_00034052	2B	85944508	85944864	0.00210785	gi|326527553|dbj|BAK08051.1|	1.39e-145	predicted protein [Hordeum vulgare subsp. vulgare]
TCONS_00034062	2B	87273958	87274429	0.0223701	gi|326531736|dbj|BAJ97872.1|	2.54e-142	predicted protein, partial [Hordeum vulgare subsp. vulgare]
TCONS_00034069	2B	87552207	87552657	0.0478391	gi|475517932|gb|EMT06144.1|	6.89e-28	hypothetical protein F775_01295 [Aegilops tauschii]
TCONS_00034070	2B	87552359	87552657	0.0469267	gi|473740429|gb|EMS45352.1|	3.28e-36	putative NOT transcription complex subunit VIP2 [Triticum urartu]
TCONS_00034142	2B	93761110	93761463	0.0309546	gi|474419380|gb|EMS67432.1|	5.7e-23	hypothetical protein TRIUR3_32334 [Triticum urartu]
TCONS_00034143	2B	93761110	93761463	0.000735626	gi|475624972|gb|EMT32808.1|	3.18e-34	hypothetical protein F775_27427 [Aegilops tauschii]
TCONS_00034244	2B	100551216	100551432	0.0401246	gi|326524159|dbj|BAJ97090.1|	0	predicted protein [Hordeum vulgare subsp. vulgare]
TCONS_00034296	2B	103594516	103594906	0.00804315	gi|474410931|gb|EMS66824.1|	4.54e-120	PsbP domain-containing protein 2, chloroplastic [Triticum urartu]
TCONS_00034352	2B	107201811	107202243	0.024584	gi|474196229|gb|EMS58387.1|	1.11e-06	hypothetical protein TRIUR3_26797 [Triticum urartu]
TCONS_00034363	2B	107516766	107516949	0.0402979	gi|326498095|dbj|BAJ94910.1|	1.28e-144	predicted protein, partial [Hordeum vulgare subsp. vulgare]
TCONS_00034432	2B	114648112	114648217	0.000987168	gi|357156128|ref|XP_003577351.1|	3.99e-35	PREDICTED: 60S ribosomal protein L5-1-like [Brachypodium distachyon]
TCONS_00034495	2B	119173777	119174047	0.0375895	gi|326496955|dbj|BAJ98504.1|	1.5e-73	predicted protein [Hordeum vulgare subsp. vulgare]
TCONS_00034581	2B	124722752	124723016	0.00767438	gi|475612530|gb|EMT28437.1|	9.85e-46	hypothetical protein F775_07984 [Aegilops tauschii]
TCONS_00034589	2B	125467936	125468012	0.0268903	gi|475579822|gb|EMT18438.1|	7.81e-122	40S ribosomal protein S8 [Aegilops tauschii]
TCONS_00034593	2B	125617864	125618025	0.0371169	gi|475596770|gb|EMT23445.1|	0	DNA (cytosine-5)-methyltransferase 1B [Aegilops tauschii]
TCONS_00034764	2B	141563000	141564589	0.000556003	gi|475453033|gb|EMT01748.1|	0	Aspartic proteinase nepenthesin-1 [Aegilops tauschii]
TCONS_00034840	2B	147266724	147267530	0.00495188	gi|475539191|gb|EMT09361.1|	1.86e-29	hypothetical protein F775_19275 [Aegilops tauschii]
TCONS_00034928	2B	157668057	157668312	0.0454924	gi|475595342|gb|EMT23006.1|	0	hypothetical protein F775_02643 [Aegilops tauschii]
TCONS_00034956	2B	160332440	160333199	0.0102645	gi|326488433|dbj|BAJ93885.1|	0	predicted protein [Hordeum vulgare subsp. vulgare]
TCONS_00034978	2B	160728515	160728939	0.00116963	NA	NA	NA
TCONS_00035080	2B	170955185	170958110	0.000201254	gi|326506342|dbj|BAJ86489.1|	0	predicted protein [Hordeum vulgare subsp. vulgare]
TCONS_00035132	2B	176054925	176056923	0.00943122	gi|475559525|gb|EMT13360.1|	0	hypothetical protein F775_08521 [Aegilops tauschii]
TCONS_00035184	2B	179734896	179735278	0.00678137	gi|326491627|dbj|BAJ94291.1|	5.64e-115	predicted protein [Hordeum vulgare subsp. vulgare]
TCONS_00035285	2B	189405142	189405291	0.000764652	gi|475613259|gb|EMT28703.1|	6.74e-143	hypothetical protein F775_52582 [Aegilops tauschii]
TCONS_00035310	2B	190243744	190244903	0.0218841	NA	NA	NA
TCONS_00035420	2B	196216852	196217179	0.00715586	gi|326496086|dbj|BAJ90664.1|	0	predicted protein [Hordeum vulgare subsp. vulgare]
TCONS_00035611	2B	210877425	210879099	0.0271202	gi|326534386|dbj|BAJ89543.1|	0	predicted protein, partial [Hordeum vulgare subsp. vulgare]
TCONS_00035636	2B	211207140	211207712	0.0188423	gi|475604702|gb|EMT25817.1|	0	Cysteine-rich receptor-like protein kinase 8 [Aegilops tauschii]
TCONS_00035985	2B	240971714	240972342	0.0326632	gi|326498485|dbj|BAJ98670.1|	0	predicted protein [Hordeum vulgare subsp. vulgare]
TCONS_00036015	2B	241141252	241141770	0.045912	gi|475625693|gb|EMT33054.1|	0	hypothetical protein F775_09106 [Aegilops tauschii]
TCONS_00036104	2B	246858432	246858663	0.0123115	gi|475537612|gb|EMT09099.1|	0	hypothetical protein F775_20885 [Aegilops tauschii]
TCONS_00036175	2B	251073497	251074047	0.0189509	gi|326492496|dbj|BAK02031.1|	7.95e-161	predicted protein [Hordeum vulgare subsp. vulgare]
TCONS_00036484	2B	271761998	271762728	0.0448465	gi|357153241|ref|XP_003576386.1|	5.5e-34	PREDICTED: protein ENDOSPERM DEFECTIVE 1-like [Brachypodium distachyon]
TCONS_00036530	2B	273682141	273683926	0.0352106	gi|475548503|gb|EMT11093.1|	0	Cis-zeatin O-glucosyltransferase 1 [Aegilops tauschii]
TCONS_00036618	2B	282540954	282541363	0.0378852	gi|326524842|dbj|BAK04357.1|	2.67e-176	predicted protein [Hordeum vulgare subsp. vulgare]
TCONS_00036859	2B	294672533	294674219	0.00956029	gi|474156920|gb|EMS57153.1|	0	Alternative oxidase 1a, mitochondrial [Triticum urartu]
TCONS_00036860	2B	294680958	294682964	0.0312547	gi|326521476|dbj|BAK00314.1|	0	predicted protein [Hordeum vulgare subsp. vulgare]
TCONS_00036970	2B	300904368	300904818	0.034003	gi|167745180|gb|ABZ91912.1|	6.7e-72	FD-like 15 protein [Triticum aestivum]
TCONS_00036994	2B	302519291	302519326	0.0484383	gi|326513006|dbj|BAK03410.1|	4.52e-177	predicted protein [Hordeum vulgare subsp. vulgare]
TCONS_00037012	2B	303319612	303319760	0.013683	gi|474438573|gb|EMS68303.1|	2.44e-62	hypothetical protein TRIUR3_22908 [Triticum urartu]
TCONS_00037191	2B	315532499	315532803	0.0414214	gi|326505728|dbj|BAJ95535.1|	5.31e-133	predicted protein [Hordeum vulgare subsp. vulgare]
TCONS_00037285	2B	324140031	324142627	0.00609835	gi|326533968|dbj|BAJ93757.1|	0	predicted protein [Hordeum vulgare subsp. vulgare]
TCONS_00037495	2B	333221992	333222887	0.0154915	gi|326504354|dbj|BAJ91009.1|	0	predicted protein [Hordeum vulgare subsp. vulgare]
TCONS_00037526	2B	335193194	335194170	0.0306523	gi|475513494|gb|EMT05621.1|	1.49e-26	Putative LRR receptor-like serine/threonine-protein kinase [Aegilops tauschii]
TCONS_00037596	2B	337867300	337867435	0.0185904	gi|326528503|dbj|BAJ93433.1|	0	predicted protein [Hordeum vulgare subsp. vulgare]
TCONS_00037756	2B	343996660	343997972	0.00148378	gi|326518132|dbj|BAK07318.1|	0	predicted protein [Hordeum vulgare subsp. vulgare]
TCONS_00037758	2B	344001530	344001876	0.0124303	gi|326488143|dbj|BAJ89910.1|	1.09e-142	predicted protein [Hordeum vulgare subsp. vulgare]
TCONS_00038176	2B	16875452	16877230	0.00176499	gi|475601247|gb|EMT24756.1|	0	Lectin-domain containing receptor kinase A4.3 [Aegilops tauschii]
TCONS_00038254	2B	22540482	22542905	0.0371636	gi|115474159|ref|NP_001060678.1|	0	Os07g0685700 [Oryza sativa Japonica Group]
TCONS_00038262	2B	23334096	23334964	0.0174377	gi|326511555|dbj|BAJ91922.1|	1.2e-40	predicted protein [Hordeum vulgare subsp. vulgare]
TCONS_00038286	2B	24767837	24768174	0.034231	gi|474119226|gb|EMS55952.1|	1.74e-89	Actin-related protein 2/3 complex subunit 5 [Triticum urartu]
TCONS_00038301	2B	26426134	26428531	0.021861	gi|326494042|dbj|BAJ85483.1|	0	predicted protein [Hordeum vulgare subsp. vulgare]
TCONS_00038305	2B	27229352	27230194	0.0227297	gi|57635149|gb|AAW52716.1|	0	peroxidase 2 [Triticum monococcum]
TCONS_00038407	2B	34928569	34929945	0.0204464	gi|326507736|dbj|BAJ86611.1|	1.68e-171	predicted protein [Hordeum vulgare subsp. vulgare]
TCONS_00038474	2B	38636442	38636542	0.0100374	gi|475516510|gb|EMT05995.1|	0	hypothetical protein F775_08325 [Aegilops tauschii]
TCONS_00038730	2B	50694923	50695242	0.0155966	gi|28555904|emb|CAD45032.1|	0	NBS-LRR disease resistance protein homologue [Hordeum vulgare]
TCONS_00038837	2B	56033593	56034291	0.0179233	NA	NA	NA
TCONS_00038875	2B	58471313	58471959	0.0318817	gi|669027696|emb|CDM81238.1|	1.21e-110	unnamed protein product [Triticum aestivum]
TCONS_00038999	2B	64841972	64842391	0.000456694	gi|326499786|dbj|BAJ90728.1|	0	predicted protein [Hordeum vulgare subsp. vulgare]
TCONS_00039065	2B	69432733	69434621	0.00268147	gi|944080623|gb|KQK15975.1|	0	hypothetical protein BRADI_1g26100 [Brachypodium distachyon]
TCONS_00039113	2B	76568488	76568964	0.000185364	gi|475567306|gb|EMT15242.1|	0	hypothetical protein F775_31879 [Aegilops tauschii]
TCONS_00039119	2B	78076834	78077548	0.0388405	gi|473753935|gb|EMS45653.1|	1.08e-93	40S ribosomal protein S15 [Triticum urartu]
TCONS_00039754	2B	117183252	117185454	0.0138953	NA	NA	NA
TCONS_00039755	2B	117183252	117184190	0.00572147	NA	NA	NA
TCONS_00039760	2B	117634285	117635768	0.0358961	gi|474159875|gb|EMS57247.1|	3.07e-65	hypothetical protein TRIUR3_25703 [Triticum urartu]
TCONS_00039918	2B	131487974	131488769	0.00705571	gi|326533358|dbj|BAJ93651.1|	0	predicted protein [Hordeum vulgare subsp. vulgare]
TCONS_00040175	2B	144822141	144822981	0.00713725	gi|326519825|dbj|BAK00285.1|	1.99e-40	predicted protein [Hordeum vulgare subsp. vulgare]
TCONS_00040390	2B	161244340	161244866	0.0312045	gi|474317117|gb|EMS62133.1|	3.94e-17	DNA-directed RNA polymerases I, II, and III subunit RPABC1 [Triticum urartu]
TCONS_00040407	2B	164497848	164498442	0.0244637	gi|326523327|dbj|BAJ88704.1|	0	predicted protein [Hordeum vulgare subsp. vulgare]
TCONS_00040422	2B	165780791	165781397	0.000287587	gi|475546351|gb|EMT10667.1|	4.51e-41	hypothetical protein F775_27842 [Aegilops tauschii]
TCONS_00040591	2B	179171101	179173131	0.0159729	gi|475516283|gb|EMT05957.1|	0	Receptor-like protein kinase 2 [Aegilops tauschii]
TCONS_00040623	2B	181036409	181036754	0.0232989	gi|404363355|gb|AFR66647.1|	1.4e-130	WRKY51 [Triticum aestivum]
TCONS_00040944	2B	203578882	203579645	0.0398056	gi|475618410|gb|EMT30439.1|	1.72e-98	hypothetical protein F775_29935 [Aegilops tauschii]
TCONS_00041318	2B	229669578	229671246	0.00265735	gi|474400686|gb|EMS66059.1|	0	hypothetical protein TRIUR3_07153 [Triticum urartu]
TCONS_00041445	2B	241304370	241304691	0.00296976	gi|326500884|dbj|BAJ95108.1|	3.06e-178	predicted protein [Hordeum vulgare subsp. vulgare]
TCONS_00041588	2B	251056215	251059345	0.00614068	gi|326491285|dbj|BAK05742.1|	1.37e-171	predicted protein [Hordeum vulgare subsp. vulgare]
TCONS_00042082	2B	283673904	283674078	0.0293319	gi|326500794|dbj|BAJ95063.1|	3.18e-62	predicted protein [Hordeum vulgare subsp. vulgare]
TCONS_00042083	2B	283674070	283674078	0.00407434	gi|326500794|dbj|BAJ95063.1|	1.32e-136	predicted protein [Hordeum vulgare subsp. vulgare]
TCONS_00042116	2B	285457329	285457741	0.0130756	gi|475587432|gb|EMT20546.1|	4.96e-48	hypothetical protein F775_43577 [Aegilops tauschii]
TCONS_00042142	2B	287909193	287909632	0.0428666	gi|326527783|dbj|BAJ88964.1|	0	predicted protein [Hordeum vulgare subsp. vulgare]
TCONS_00042302	2B	294202810	294203534	0.00361739	gi|326519226|dbj|BAJ96612.1|	0	predicted protein [Hordeum vulgare subsp. vulgare]
TCONS_00042316	2B	294672620	294673843	0.0117447	gi|474156920|gb|EMS57153.1|	0	Alternative oxidase 1a, mitochondrial [Triticum urartu]
TCONS_00042355	2B	297042175	297042782	0.0146367	gi|326524934|dbj|BAK04403.1|	0	predicted protein, partial [Hordeum vulgare subsp. vulgare]
TCONS_00042494	2B	304106840	304109285	0.000947815	gi|475621184|gb|EMT31381.1|	4.22e-136	hypothetical protein F775_17361 [Aegilops tauschii]
TCONS_00042550	2B	307930695	307932396	0.0473006	gi|475516681|gb|EMT06017.1|	3.67e-124	hypothetical protein F775_08478 [Aegilops tauschii]
TCONS_00042553	2B	307930695	307932396	0.0313172	gi|475516681|gb|EMT06017.1|	7.6e-163	hypothetical protein F775_08478 [Aegilops tauschii]
TCONS_00042600	2B	312137469	312137874	0.0487888	gi|475539387|gb|EMT09406.1|	6.99e-164	hypothetical protein F775_00176 [Aegilops tauschii]
TCONS_00042620	2B	313036989	313038240	0.0287766	gi|4158230|emb|CAA77236.1|	0	amylogenin [Triticum aestivum]
TCONS_00042690	2B	317446035	317451464	0.0433676	gi|357130696|ref|XP_003566983.1|	0	PREDICTED: callose synthase 12-like [Brachypodium distachyon]
TCONS_00042920	2B	331711938	331712460	0.0381065	gi|475611106|gb|EMT27976.1|	1.52e-14	hypothetical protein F775_43817 [Aegilops tauschii]
TCONS_00042954	2B	333847796	333848345	0.0122565	gi|475611105|gb|EMT27975.1|	3.42e-35	hypothetical protein F775_17442 [Aegilops tauschii]
TCONS_00043026	2B	338639909	338640542	0.00511346	gi|475619730|gb|EMT30859.1|	1.39e-26	hypothetical protein F775_08211 [Aegilops tauschii]
TCONS_00043110	2B	342586887	342588665	0.0275482	gi|326489879|dbj|BAJ94013.1|	8.44e-109	predicted protein [Hordeum vulgare subsp. vulgare]
TCONS_00043118	2B	342824026	342824376	0.0455191	gi|475576265|gb|EMT17498.1|	2.19e-107	hypothetical protein F775_52597 [Aegilops tauschii]
TCONS_00043121	2B	342957865	342958777	0.0018779	gi|475612807|gb|EMT28540.1|	4.19e-147	Protein FAR1-RELATED SEQUENCE 5 [Aegilops tauschii]
TCONS_00043170	2B	345238699	345239913	1.03e-59	gi|77551931|gb|ABA94728.1|	9.92e-128	Jacalin-like lectin domain containing protein [Oryza sativa Japonica Group]
TCONS_00043239	2B	16618398	16620379	0.024225	gi|944066416|gb|KQK02007.1|	4.94e-35	hypothetical protein BRADI_3g59795 [Brachypodium distachyon]
TCONS_00043436	2B	129303701	129304680	0.0331884	gi|475542459|gb|EMT09963.1|	5.17e-43	hypothetical protein F775_08538 [Aegilops tauschii]
TCONS_00043438	2B	131098755	131099724	0.0215276	gi|242047336|ref|XP_002461414.1|	4.04e-46	hypothetical protein SORBIDRAFT_02g002250 [Sorghum bicolor]
TCONS_00043618	2B	251440139	251440801	0.00299732	NA	NA	NA
TCONS_00043650	2B	267007360	267008807	0.0135679	gi|474015310|gb|EMS52665.1|	4.43e-11	Heat shock 70 kDa protein 4L [Triticum urartu]
TCONS_00043737	2B	302668802	302669600	0.0393665	NA	NA	NA
TCONS_00043815	2B	329835980	329836605	0.0341781	gi|475584094|gb|EMT19670.1|	6.81e-47	hypothetical protein F775_08462 [Aegilops tauschii]
TCONS_00043869	2B	342436692	342438004	0.00474991	gi|474323868|gb|EMS62401.1|	5.21e-41	Ubiquitin carboxyl-terminal hydrolase 9 [Triticum urartu]
TR105012_c0_g1_i1	2B	65680720	65681745	0.00155261	gi|115349898|gb|ABI95397.1|	2.44e-167	fasciclin-like protein FLA7 [Triticum aestivum]
TR126019_c0_g1_i1	2B	263119270	263121904	0.0110005	gi|475581767|gb|EMT18940.1|	7.6e-76	Rhomboid family member 1 [Aegilops tauschii]
TR131310_c1_g1_i1	2B	59928862	59930863	3.21e-05	gi|473939794|gb|EMS50280.1|	6.37e-79	hypothetical protein TRIUR3_23665 [Triticum urartu]
TR148307_c4_g2_i8	2B	11956520	11957967	0.0160548	gi|475573263|gb|EMT16694.1|	1.91e-57	Anthocyanidin 5,3-O-glucosyltransferase [Aegilops tauschii]
TR151090_c1_g1_i2	2B	179734904	179738414	0.00971459	gi|326491627|dbj|BAJ94291.1|	5.07e-139	predicted protein [Hordeum vulgare subsp. vulgare]
TR155745_c1_g2_i1	2B	16934817	16936802	0.0467511	gi|474443506|gb|EMS68496.1|	0	Premnaspirodiene oxygenase [Triticum urartu]
TR159123_c1_g1_i1	2B	189405142	189407668	0.00132186	gi|475613259|gb|EMT28703.1|	1.97e-139	hypothetical protein F775_52582 [Aegilops tauschii]
TR163165_c0_g1_i1	2B	57477968	57480083	0.00262291	gi|475496928|gb|EMT03949.1|	1.38e-112	hypothetical protein F775_05807 [Aegilops tauschii]
TR164169_c1_g1_i10	2B	211207264	211210280	0.0258449	gi|475604702|gb|EMT25817.1|	0	Cysteine-rich receptor-like protein kinase 8 [Aegilops tauschii]
TR165446_c0_g4_i4	2B	94710891	94718594	0.0337973	gi|326494114|dbj|BAJ85519.1|	3.59e-32	predicted protein [Hordeum vulgare subsp. vulgare]
TR166083_c0_g1_i1	2B	209597443	209599727	0.0240457	gi|326494046|dbj|BAJ85485.1|	0	predicted protein [Hordeum vulgare subsp. vulgare]
TR167267_c1_g1_i1	2B	31772027	31774198	0.0447868	gi|475594802|gb|EMT22828.1|	6.49e-146	Two-component response regulator ARR2 [Aegilops tauschii]
TR168822_c0_g1_i8	2B	119173964	119175731	0.0164819	gi|326496955|dbj|BAJ98504.1|	1.3e-63	predicted protein [Hordeum vulgare subsp. vulgare]
TR171846_c0_g2_i2	2B	11562815	11564325	0.0266035	gi|326513755|dbj|BAJ87896.1|	0	predicted protein [Hordeum vulgare subsp. vulgare]
TR172712_c0_g1_i2	2B	341405488	341407126	0.0488409	gi|475530825|gb|EMT07962.1|	5.47e-74	hypothetical protein F775_11283 [Aegilops tauschii]
TR174058_c0_g1_i5	2B	34928569	34930231	0.00173807	gi|326507736|dbj|BAJ86611.1|	0	predicted protein [Hordeum vulgare subsp. vulgare]
TR177386_c1_g1_i3	2B	15301631	15305003	0.0399091	gi|475571656|gb|EMT16313.1|	7.97e-176	Serine/threonine-protein kinase PBS1 [Aegilops tauschii]
TR178154_c0_g1_i2	2B	284389151	284390826	0.0395253	gi|474347249|gb|EMS62914.1|	2.41e-76	RING-H2 finger protein ATL44 [Triticum urartu]
TR178788_c4_g1_i1	2B	121735329	121736473	0.00357761	gi|326495592|dbj|BAJ85892.1|	6.2e-93	predicted protein [Hordeum vulgare subsp. vulgare]
TR181406_c0_g3_i5	2B	164497848	164503767	0.00266135	gi|326523327|dbj|BAJ88704.1|	0	predicted protein [Hordeum vulgare subsp. vulgare]
TR182064_c1_g2_i4	2B	338792919	338794013	0.0448662	gi|474326852|gb|EMS62497.1|	4.89e-100	hypothetical protein TRIUR3_09712 [Triticum urartu]
TR182105_c0_g3_i1	2B	17600053	17605283	0.0331589	gi|357121371|ref|XP_003562394.1|	0	PREDICTED: required for meiotic nuclear division protein 1 homolog [Brachypodium distachyon]
TR183500_c5_g4_i2	2B	250820707	250825259	0.0363	gi|475577603|gb|EMT17861.1|	6.16e-180	Putative serine/threonine-protein kinase receptor [Aegilops tauschii]
TR183500_c5_g4_i8	2B	250820707	250825259	0.0132666	gi|475577603|gb|EMT17861.1|	5.36e-180	Putative serine/threonine-protein kinase receptor [Aegilops tauschii]
TR184273_c1_g1_i6	2B	246858432	246860956	0.00361509	gi|475477047|gb|EMT02666.1|	1.34e-148	hypothetical protein F775_20880 [Aegilops tauschii]
TR184273_c1_g1_i7	2B	246858432	246860956	0.0055589	gi|475477047|gb|EMT02666.1|	2.61e-159	hypothetical protein F775_20880 [Aegilops tauschii]
TR184394_c0_g1_i2	2B	331922175	331925831	0.0181157	gi|475585413|gb|EMT20050.1|	0	Putative E3 ubiquitin-protein ligase [Aegilops tauschii]
TR186703_c0_g1_i14	2B	293037800	293039839	0.021339	gi|357165813|ref|XP_003580502.1|	5.55e-117	PREDICTED: putative RNA methyltransferase At5g10620 [Brachypodium distachyon]
TR189391_c3_g2_i4	2B	47231312	47235155	0.0369361	gi|670410758|ref|XP_008646486.1|	1.43e-33	PREDICTED: uncharacterized protein LOC103627967 [Zea mays]
TR189436_c1_g1_i4	2B	229669578	229672108	0.00618126	gi|474400686|gb|EMS66059.1|	0	hypothetical protein TRIUR3_07153 [Triticum urartu]
TR190600_c0_g1_i2	2B	194720667	194723065	0.00181204	gi|326524011|dbj|BAJ97016.1|	2.77e-128	predicted protein [Hordeum vulgare subsp. vulgare]
TR190640_c0_g1_i1	2B	13797821	13801281	0.0171013	gi|475528431|gb|EMT07626.1|	2.47e-138	Thylakoid lumenal 15.0 kDa protein 2, chloroplastic [Aegilops tauschii]
TR191084_c0_g1_i2	2B	319317555	319318753	0.0430708	gi|326512560|dbj|BAJ99635.1|	3.98e-12	predicted protein [Hordeum vulgare subsp. vulgare]
TR191768_c0_g2_i3	2B	227895450	227896583	0.0379199	NA	NA	NA
TR192416_c1_g3_i1	2B	16875452	16877230	0.0324916	gi|475601247|gb|EMT24756.1|	6.42e-144	Lectin-domain containing receptor kinase A4.3 [Aegilops tauschii]
TR193842_c0_g1_i6	2B	311457446	311459824	0.0436934	gi|226496353|ref|NP_001142249.1|	6.78e-164	uncharacterized protein LOC100274418 [Zea mays]
TR193870_c0_g1_i1	2B	337939996	337942558	0.00409458	gi|115461352|ref|NP_001054276.1|	9.52e-155	Os04g0678900 [Oryza sativa Japonica Group]
TR195868_c0_g1_i2	2B	243313992	243318391	0.0208903	gi|326490997|dbj|BAK05598.1|	0	predicted protein [Hordeum vulgare subsp. vulgare]
TR195868_c0_g1_i3	2B	243313992	243318391	0.0465752	gi|326490997|dbj|BAK05598.1|	3.22e-151	predicted protein [Hordeum vulgare subsp. vulgare]
TR195868_c0_g1_i7	2B	243313992	243318391	0.0406497	gi|475626275|gb|EMT33274.1|	0	Protein kinase APK1A, chloroplastic [Aegilops tauschii]
TR195991_c0_g1_i6	2B	111546089	111547659	0.000548156	gi|475433689|gb|EMT01264.1|	1.63e-140	hypothetical protein F775_09581 [Aegilops tauschii]
TR196949_c0_g1_i7	2B	246858432	246860956	0.00431333	gi|326500988|dbj|BAJ98725.1|	0	predicted protein [Hordeum vulgare subsp. vulgare]
TR197023_c0_g1_i2	2B	221174060	221178878	0.0348598	gi|326488409|dbj|BAJ93873.1|	0	predicted protein [Hordeum vulgare subsp. vulgare]
TR200743_c8_g2_i1	2B	273676994	273678907	0.0106444	gi|474057825|gb|EMS53900.1|	8.95e-83	Cis-zeatin O-glucosyltransferase 2 [Triticum urartu]
TR202205_c2_g2_i1	2B	6277714	6279105	0.0312749	gi|326506560|dbj|BAJ91321.1|	4.39e-44	predicted protein, partial [Hordeum vulgare subsp. vulgare]
TR203533_c0_g1_i1	2B	340398591	340400247	0.00144823	gi|944248423|gb|KQL12686.1|	1.79e-104	hypothetical protein SETIT_024634mg, partial [Setaria italica]
TR204275_c0_g1_i3	2B	33476821	33478204	0.0413839	gi|326519148|dbj|BAJ96573.1|	6.54e-125	predicted protein [Hordeum vulgare subsp. vulgare]
TR209034_c0_g1_i2	2B	10166977	10169978	0.0449113	gi|326491935|dbj|BAJ98192.1|	6.09e-118	predicted protein [Hordeum vulgare subsp. vulgare]
TR210485_c0_g2_i3	2B	230782831	230787588	0.022902	gi|326517717|dbj|BAK03777.1|	0	predicted protein [Hordeum vulgare subsp. vulgare]
TR211572_c0_g1_i1	2B	266489966	266492372	0.0268011	gi|474404688|gb|EMS66404.1|	0	Uncharacterized protein YhcW [Triticum urartu]
TR211614_c0_g1_i10	2B	51487700	51489627	0.000292317	gi|474299584|gb|EMS61571.1|	6.4e-77	putative 4-coumarate--CoA ligase 5 [Triticum urartu]
TR213004_c3_g3_i2	2B	199565832	199567797	0.0453351	gi|475356627|gb|EMT00465.1|	1.1e-139	Putative polyol transporter 1 [Aegilops tauschii]
TR219907_c1_g1_i6	2B	296683535	296683910	0.0459508	NA	NA	NA
TR221214_c0_g1_i2	2B	107519355	107522181	0.00145872	gi|474321035|gb|EMS62300.1|	2.75e-110	Cytochrome P450 81D1 [Triticum urartu]
TR222904_c0_g1_i5	2B	34615238	34617762	0.0111089	gi|326530093|dbj|BAK08326.1|	0	predicted protein [Hordeum vulgare subsp. vulgare]
TR223324_c2_g1_i2	2B	68609789	68611229	0.0369742	gi|475600552|gb|EMT24568.1|	0	Flavonol 4&apos;-sulfotransferase [Aegilops tauschii]
TR224160_c0_g2_i3	2B	223887005	223887323	0.0399567	gi|721628445|ref|XP_010229759.1|	1.41e-38	PREDICTED: zinc finger BED domain-containing protein RICESLEEPER 2-like [Brachypodium distachyon]
TR228087_c3_g1_i1	2B	324140031	324142627	0.00639189	gi|475512696|gb|EMT05514.1|	3.05e-77	Receptor-like protein kinase HERK 1 [Aegilops tauschii]
TR228476_c2_g1_i4	2B	295577334	295580285	0.0124296	gi|326490736|dbj|BAJ90035.1|	0	predicted protein [Hordeum vulgare subsp. vulgare]
TR230081_c0_g2_i10	2B	124800420	124803625	0.0461305	gi|475529110|gb|EMT07724.1|	6.7e-131	Putative serine/threonine-protein kinase receptor [Aegilops tauschii]
TR230102_c0_g1_i2	2B	99112300	99113904	0.0190088	gi|475563012|gb|EMT14189.1|	0	hypothetical protein F775_52671 [Aegilops tauschii]
TR230142_c0_g1_i3	2B	59135614	59137139	0.0148693	gi|475570056|gb|EMT15914.1|	3.61e-114	Putative WRKY transcription factor 41 [Aegilops tauschii]
TR231154_c0_g1_i1	2B	36879378	36883732	0.0206862	gi|474384687|gb|EMS64834.1|	1.56e-170	hypothetical protein TRIUR3_21449 [Triticum urartu]
TR233178_c0_g2_i4	2B	284884575	284888502	0.0483353	gi|363987144|dbj|BAL41692.1|	0	ent-kaurene synthase like 5 [Triticum aestivum]
TR234922_c3_g2_i1	2B	304111758	304113339	0.0135707	gi|475621185|gb|EMT31382.1|	1.4e-79	hypothetical protein F775_17362 [Aegilops tauschii]
TR236801_c0_g1_i6	2B	11217947	11219785	0.0438276	gi|357139173|ref|XP_003571159.1|	0	PREDICTED: hydroquinone glucosyltransferase-like [Brachypodium distachyon]
TR236812_c0_g1_i1	2B	173229654	173232672	0.00791933	gi|326496957|dbj|BAJ98505.1|	1.52e-145	predicted protein [Hordeum vulgare subsp. vulgare]
TR237425_c1_g4_i5	2B	309477347	309481053	0.0431571	gi|475624975|gb|EMT32810.1|	7.52e-75	Putative LRR receptor-like serine/threonine-protein kinase [Aegilops tauschii]
TR238698_c1_g2_i2	2B	28589455	28594406	0.0363386	gi|326493268|dbj|BAJ85095.1|	0	predicted protein [Hordeum vulgare subsp. vulgare]
TR94644_c0_g1_i2	2B	56940458	56942006	0.000610939	gi|669031317|emb|CDM86223.1|	7.64e-125	unnamed protein product [Triticum aestivum]
TR97158_c0_g1_i1	2B	324140031	324142627	0.0301204	gi|326514882|dbj|BAJ99802.1|	1.33e-145	predicted protein [Hordeum vulgare subsp. vulgare]
TCONS_00043890	2D	343402	346279	0.0129565	gi|475517801|gb|EMT06131.1|	0	Putative LRR receptor-like serine/threonine-protein kinase [Aegilops tauschii]
TCONS_00043992	2D	3630565	3630667	0.0477785	gi|357166522|ref|XP_003580738.1|	0	PREDICTED: acetyl-CoA acetyltransferase, cytosolic 1-like [Brachypodium distachyon]
TCONS_00044490	2D	17317993	17318370	0.0474221	gi|475621273|gb|EMT31416.1|	0	Secologanin synthase [Aegilops tauschii]
TCONS_00044496	2D	17504265	17504604	0.0193605	gi|475515055|gb|EMT05793.1|	1.59e-175	Short-chain dehydrogenase/reductase 2 [Aegilops tauschii]
TCONS_00044508	2D	17802681	17803288	0.00839113	gi|475620216|gb|EMT31034.1|	0	Lectin-domain containing receptor kinase A4.3 [Aegilops tauschii]
TCONS_00044550	2D	19273259	19273551	0.00880675	gi|475596392|gb|EMT23342.1|	0	Peroxidase 1 [Aegilops tauschii]
TCONS_00044566	2D	20244528	20244959	0.0368202	gi|475516510|gb|EMT05995.1|	0	hypothetical protein F775_08325 [Aegilops tauschii]
TCONS_00044793	2D	26669825	26670258	0.0447027	gi|475626196|gb|EMT33238.1|	2.34e-146	hypothetical protein F775_30282 [Aegilops tauschii]
TCONS_00044845	2D	29181677	29182078	0.0130283	gi|326493098|dbj|BAJ85010.1|	0	predicted protein [Hordeum vulgare subsp. vulgare]
TCONS_00044927	2D	32677069	32677908	0.0312457	gi|475566592|gb|EMT15056.1|	1.61e-117	Cytokinin-O-glucosyltransferase 3 [Aegilops tauschii]
TCONS_00044953	2D	32971261	32973309	0.00409579	gi|474404688|gb|EMS66404.1|	0	Uncharacterized protein YhcW [Triticum urartu]
TCONS_00045053	2D	36096877	36097334	0.0125182	gi|326500794|dbj|BAJ95063.1|	1.17e-160	predicted protein [Hordeum vulgare subsp. vulgare]
TCONS_00045236	2D	44871390	44871456	0.0303837	gi|294653502|gb|ADF28625.1|	0	WRKY78 transcription factor [Triticum aestivum]
TCONS_00045532	2D	54154802	54155467	0.00228016	gi|474156691|gb|EMS57129.1|	4.85e-150	Transmembrane protein 87B [Triticum urartu]
TCONS_00045621	2D	57651467	57651678	0.0380311	gi|326511892|dbj|BAJ92090.1|	0	predicted protein [Hordeum vulgare subsp. vulgare]
TCONS_00045685	2D	59032441	59033251	0.0412568	gi|475551947|gb|EMT11718.1|	0	RNA-binding Musashi-Rbp6-like protein [Aegilops tauschii]
TCONS_00045753	2D	62922478	62923177	0.0296998	NA	NA	NA
TCONS_00045818	2D	67108403	67108604	0.00500764	gi|326499786|dbj|BAJ90728.1|	2.36e-103	predicted protein [Hordeum vulgare subsp. vulgare]
TCONS_00046083	2D	75977385	75977781	0.000187674	gi|474419380|gb|EMS67432.1|	9.82e-67	hypothetical protein TRIUR3_32334 [Triticum urartu]
TCONS_00046084	2D	75977386	75977781	0.0117039	gi|474419380|gb|EMS67432.1|	3.78e-69	hypothetical protein TRIUR3_32334 [Triticum urartu]
TCONS_00046158	2D	79561172	79561359	0.0170899	gi|326530542|dbj|BAJ97697.1|	1.26e-29	predicted protein [Hordeum vulgare subsp. vulgare]
TCONS_00046225	2D	81446923	81447029	0.0201637	gi|475513268|gb|EMT05600.1|	0	hypothetical protein F775_14441 [Aegilops tauschii]
TCONS_00046336	2D	86642633	86643338	0.00329519	gi|475539191|gb|EMT09361.1|	1.01e-34	hypothetical protein F775_19275 [Aegilops tauschii]
TCONS_00046428	2D	90198846	90199014	0.0388009	gi|475466716|gb|EMT02210.1|	1.77e-88	Histone H3.3 [Aegilops tauschii]
TCONS_00046515	2D	93380449	93380535	0.0235181	gi|475546351|gb|EMT10667.1|	2.89e-43	hypothetical protein F775_27842 [Aegilops tauschii]
TCONS_00046516	2D	93384108	93384298	0.0084835	gi|474163622|gb|EMS57371.1|	8.24e-59	hypothetical protein TRIUR3_01191 [Triticum urartu]
TCONS_00046799	2D	106421965	106422355	1.03e-59	gi|475623331|gb|EMT32174.1|	0	Protein argonaute MEL1 [Aegilops tauschii]
TCONS_00047080	2D	114593373	114593608	0.0390579	gi|473754388|gb|EMS45671.1|	0	Uridylate kinase [Triticum urartu]
TCONS_00047124	2D	116268322	116268458	0.046842	gi|326490946|dbj|BAJ90140.1|	7.48e-82	predicted protein [Hordeum vulgare subsp. vulgare]
TCONS_00047155	2D	118557217	118557525	0.000552198	gi|475583358|gb|EMT19430.1|	3.09e-86	Cytochrome c6, chloroplastic [Aegilops tauschii]
TCONS_00047231	2D	120080346	120080484	0.00730858	gi|474276764|gb|EMS61084.1|	0	Glutamate receptor 3.4 [Triticum urartu]
TCONS_00047294	2D	124255295	124255477	0.00563246	gi|326492201|dbj|BAJ98325.1|	0	predicted protein, partial [Hordeum vulgare subsp. vulgare]
TCONS_00047362	2D	127591028	127591070	0.0201409	gi|475504377|gb|EMT04629.1|	6.02e-47	hypothetical protein F775_31211 [Aegilops tauschii]
TCONS_00047477	2D	132127474	132127933	0.021389	gi|475623224|gb|EMT32143.1|	0	Lysosomal beta glucosidase [Aegilops tauschii]
TCONS_00047491	2D	132714545	132715259	0.00309612	gi|475555931|gb|EMT12544.1|	0	Wall-associated receptor kinase 3 [Aegilops tauschii]
TCONS_00047716	2D	140519041	140521890	0.0165906	gi|121483256|gb|ABM54074.1|	0	GTP cyclohydrolase 1 isoform TaA [Triticum aestivum]
TCONS_00047719	2D	140849616	140852599	0.0142621	gi|475473463|gb|EMT02495.1|	0	Histidyl-tRNA synthetase [Aegilops tauschii]
TCONS_00047832	2D	145030198	145032299	0.0172218	gi|475611113|gb|EMT27983.1|	0	Disease resistance RPP13-like protein 4 [Aegilops tauschii]
TCONS_00048025	2D	149803836	149804350	0.0199831	gi|475597901|gb|EMT23756.1|	0	MutS2 protein [Aegilops tauschii]
TCONS_00048175	2D	2510047	2510267	0.00115149	gi|669027693|emb|CDM81233.1|	6.06e-85	unnamed protein product [Triticum aestivum]
TCONS_00048181	2D	2680651	2684739	0.0112804	gi|475517244|gb|EMT06071.1|	0	hypothetical protein F775_20080 [Aegilops tauschii]
TCONS_00048271	2D	4972087	4973257	0.00264945	gi|475522684|gb|EMT06786.1|	2.03e-171	Putative serine/threonine-protein kinase-like protein CCR3 [Aegilops tauschii]
TCONS_00048377	2D	8424845	8425290	0.0289851	gi|326495802|dbj|BAJ85997.1|	0	predicted protein [Hordeum vulgare subsp. vulgare]
TCONS_00048539	2D	13143689	13144073	0.0129532	gi|326495248|dbj|BAJ85720.1|	7.36e-40	predicted protein, partial [Hordeum vulgare subsp. vulgare]
TCONS_00048543	2D	13236716	13237608	0.0309617	gi|326495991|dbj|BAJ90617.1|	5.2e-106	predicted protein [Hordeum vulgare subsp. vulgare]
TCONS_00048608	2D	15155310	15155784	0.0164515	gi|326521474|dbj|BAK00313.1|	5.63e-146	predicted protein [Hordeum vulgare subsp. vulgare]
TCONS_00048709	2D	18236940	18237386	0.033066	gi|474311709|gb|EMS61933.1|	3.46e-51	hypothetical protein TRIUR3_31361 [Triticum urartu]
TCONS_00048757	2D	18686598	18687325	0.0320105	NA	NA	NA
TCONS_00048857	2D	21366537	21367064	0.0313509	gi|475596321|gb|EMT23325.1|	0	hypothetical protein F775_06894 [Aegilops tauschii]
TCONS_00048865	2D	21392333	21392933	0.00111757	gi|475606151|gb|EMT26300.1|	6.18e-22	Nuclear pore complex protein [Aegilops tauschii]
TCONS_00048928	2D	23019587	23020164	0.0486501	gi|473750044|gb|EMS45596.1|	0	hypothetical protein TRIUR3_10692 [Triticum urartu]
TCONS_00049108	2D	26940644	26940716	0.0215638	gi|475433638|gb|EMT01263.1|	0	Disease resistance protein RPS2 [Aegilops tauschii]
TCONS_00049281	2D	34644250	34645330	0.0405013	gi|326508640|dbj|BAJ95842.1|	3.64e-106	predicted protein [Hordeum vulgare subsp. vulgare]
TCONS_00049343	2D	36550105	36550535	0.0407472	gi|475565079|gb|EMT14694.1|	0	hypothetical protein F775_28308 [Aegilops tauschii]
TCONS_00049474	2D	42095561	42096459	0.0334178	NA	NA	NA
TCONS_00049674	2D	46651834	46652584	0.0127817	gi|326494228|dbj|BAJ90383.1|	8.24e-56	predicted protein [Hordeum vulgare subsp. vulgare]
TCONS_00049716	2D	46782354	46783313	0.0426702	gi|944069782|gb|KQK05266.1|	4.47e-13	hypothetical protein BRADI_2g19080 [Brachypodium distachyon]
TCONS_00049920	2D	54042406	54043264	0.0479308	gi|475548003|gb|EMT10981.1|	2.89e-74	hypothetical protein F775_01011 [Aegilops tauschii]
TCONS_00050072	2D	60961102	60961723	0.0252945	gi|474236855|gb|EMS59613.1|	1.6e-125	40S ribosomal protein S9-2 [Triticum urartu]
TCONS_00050074	2D	61020901	61022753	0.000852638	gi|475562409|gb|EMT14020.1|	0	hypothetical protein F775_03565 [Aegilops tauschii]
TCONS_00050250	2D	74486637	74486988	0.0091323	gi|119784|sp|P23902.1|KASC1_HORVU	0	RecName: Full=3-oxoacyl-[acyl-carrier-protein] synthase I, chloroplastic; AltName: Full=Beta-ketoacyl-ACP synthase I; Short=KAS I; Flags: Precursor
TCONS_00050408	2D	79646426	79648139	0.0472949	gi|326495254|dbj|BAJ85723.1|	1.2e-82	predicted protein [Hordeum vulgare subsp. vulgare]
TCONS_00050500	2D	82612753	82613717	0.0352657	gi|218187467|gb|EEC69894.1|	9.81e-18	hypothetical protein OsI_00297 [Oryza sativa Indica Group]
TCONS_00050855	2D	97008410	97008971	0.0310211	gi|475578958|gb|EMT18230.1|	7.42e-06	3-oxoacyl-(acyl-carrier-protein) synthase, mitochondrial [Aegilops tauschii]
TCONS_00050885	2D	97218486	97218826	0.000395982	gi|721611072|ref|XP_010236768.1|	7.35e-156	PREDICTED: protein TIC 20-I, chloroplastic-like [Brachypodium distachyon]
TCONS_00050992	2D	103262227	103263671	0.0277884	gi|326496701|dbj|BAJ98377.1|	3.74e-148	predicted protein [Hordeum vulgare subsp. vulgare]
TCONS_00051182	2D	111118881	111118944	0.0266095	gi|475489083|gb|EMT03409.1|	0	Isoleucyl-tRNA synthetase [Aegilops tauschii]
TCONS_00051188	2D	111118881	111118944	0.0122701	gi|475489083|gb|EMT03409.1|	0	Isoleucyl-tRNA synthetase [Aegilops tauschii]
TCONS_00051379	2D	115737682	115738265	0.0464863	gi|475537357|gb|EMT09060.1|	5.32e-135	hypothetical protein F775_30346 [Aegilops tauschii]
TCONS_00051417	2D	117561514	117561590	0.0144868	gi|475602784|gb|EMT25221.1|	0	Peptidyl-prolyl cis-trans isomerase CYP37, chloroplastic [Aegilops tauschii]
TCONS_00051531	2D	120553066	120553554	1.12e-59	gi|475572790|gb|EMT16588.1|	0	Eukaryotic translation initiation factor 4G [Aegilops tauschii]
TCONS_00051641	2D	125064985	125066353	0.0179925	gi|475622067|gb|EMT31732.1|	0	hypothetical protein F775_52629 [Aegilops tauschii]
TCONS_00051702	2D	127967593	127967927	0.0153371	gi|475517415|gb|EMT06093.1|	2.34e-87	Protein CutA 1, chloroplastic [Aegilops tauschii]
TCONS_00051787	2D	130916687	130917321	0.0221172	gi|326532196|dbj|BAK01474.1|	0	predicted protein [Hordeum vulgare subsp. vulgare]
TCONS_00051986	2D	136833019	136834097	0.0476258	gi|46946554|gb|AAT06527.1|	1.09e-92	polyphenol oxidase, partial [Triticum aestivum]
TCONS_00052101	2D	141158252	141159453	0.00681695	gi|475512694|gb|EMT05512.1|	0	Wall-associated receptor kinase-like protein 8 [Aegilops tauschii]
TCONS_00052121	2D	142712390	142712620	0.0308374	gi|475573449|gb|EMT16753.1|	3.11e-143	Vacuolar cation/proton exchanger 3 [Aegilops tauschii]
TCONS_00052134	2D	143057539	143058740	0.000970174	gi|475566422|gb|EMT15026.1|	0	Wall-associated receptor kinase 5 [Aegilops tauschii]
TCONS_00052427	2D	18655773	18657135	0.00174006	NA	NA	NA
TCONS_00052496	2D	34233933	34234819	0.0132228	NA	NA	NA
TCONS_00052801	2D	130191947	130192601	0.0375385	NA	NA	NA
TCONS_00052820	2D	133143869	133145023	0.0362349	NA	NA	NA
TR106292_c0_g1_i4	2D	131475870	131485139	0.0213172	gi|473732843|gb|EMS45219.1|	3.01e-124	Soluble starch synthase 3, chloroplastic/amyloplastic [Triticum urartu]
TR113886_c0_g2_i1	2D	20413116	20413940	0.000753413	gi|475500625|gb|EMT04270.1|	1.51e-27	hypothetical protein F775_42390 [Aegilops tauschii]
TR140775_c0_g2_i1	2D	141158252	141162377	0.00591981	gi|475512694|gb|EMT05512.1|	4.62e-53	Wall-associated receptor kinase-like protein 8 [Aegilops tauschii]
TR143219_c0_g2_i1	2D	76320745	76321676	0.0449113	gi|125542623|gb|EAY88762.1|	1.63e-60	hypothetical protein OsI_10238 [Oryza sativa Indica Group]
TR145148_c0_g2_i1	2D	11243132	11246221	0.00341312	gi|326503426|dbj|BAJ86219.1|	3.99e-111	predicted protein [Hordeum vulgare subsp. vulgare]
TR146697_c0_g2_i2	2D	7454835	7460634	0.0151543	gi|357122618|ref|XP_003563012.1|	0	PREDICTED: pleiotropic drug resistance protein 5-like [Brachypodium distachyon]
TR149674_c2_g5_i2	2D	51323979	51324989	0.0290909	gi|189172065|gb|ACD80388.1|	7.83e-96	WRKY42 transcription factor, partial [Triticum aestivum]
TR159494_c1_g1_i7	2D	141158252	141162377	0.00478782	gi|944049374|gb|KQJ85015.1|	0	hypothetical protein BRADI_5g24311 [Brachypodium distachyon]
TR165032_c0_g2_i2	2D	90114079	90114592	0.0353529	NA	NA	NA
TR165329_c0_g1_i3	2D	40354997	40358715	0.0124545	gi|326514214|dbj|BAJ92257.1|	0	predicted protein [Hordeum vulgare subsp. vulgare]
TR170919_c2_g1_i7	2D	134572376	134575886	0.0364549	gi|474274156|gb|EMS60999.1|	0	Coatomer subunit beta&apos;-1 [Triticum urartu]
TR175753_c2_g3_i4	2D	138379976	138381933	0.0181351	gi|514720343|ref|XP_004954462.1|	2.16e-32	PREDICTED: DEAD-box ATP-dependent RNA helicase 48-like [Setaria italica]
TR178771_c3_g3_i10	2D	17802681	17805863	0.00686279	gi|475620216|gb|EMT31034.1|	0	Lectin-domain containing receptor kinase A4.3 [Aegilops tauschii]
TR178771_c3_g3_i9	2D	17795121	17797175	0.028868	gi|475620216|gb|EMT31034.1|	0	Lectin-domain containing receptor kinase A4.3 [Aegilops tauschii]
TR189610_c1_g1_i4	2D	3976746	3979628	0.0169549	gi|116310894|emb|CAH67834.1|	2.74e-112	B0616E02-H0507E05.10 [Oryza sativa Indica Group]
TR189722_c0_g1_i1	2D	128540069	128542497	0.00811496	gi|475561631|gb|EMT13805.1|	2.96e-134	hypothetical protein F775_09548 [Aegilops tauschii]
TR195478_c1_g1_i7	2D	28147510	28151776	0.0461153	gi|326508204|dbj|BAJ99369.1|	3.87e-65	predicted protein [Hordeum vulgare subsp. vulgare]
TR202626_c0_g1_i1	2D	54060341	54064262	0.0061502	gi|326493606|dbj|BAJ85264.1|	3.45e-76	predicted protein, partial [Hordeum vulgare subsp. vulgare]
TR207405_c0_g1_i1	2D	21773299	21775588	0.0491818	NA	NA	NA
TR208358_c0_g1_i1	2D	132442826	132448410	0.0376374	gi|357165979|ref|XP_003580558.1|	0	PREDICTED: gamma-soluble NSF attachment protein [Brachypodium distachyon]
TR211589_c1_g1_i5	2D	3650368	3654567	4.94e-05	gi|475572428|gb|EMT16497.1|	0	Disease resistance protein RPM1 [Aegilops tauschii]
TR211589_c1_g1_i6	2D	3650368	3654567	0.0252588	gi|475572428|gb|EMT16497.1|	0	Disease resistance protein RPM1 [Aegilops tauschii]
TR211589_c1_g1_i8	2D	3237704	3240579	0.0423286	gi|475572428|gb|EMT16497.1|	0	Disease resistance protein RPM1 [Aegilops tauschii]
TR213891_c0_g1_i3	2D	5405759	5407857	0.0134381	gi|326522692|dbj|BAJ88392.1|	2.02e-72	predicted protein [Hordeum vulgare subsp. vulgare]
TR216912_c3_g4_i5	2D	14074703	14079919	0.0481764	gi|338808457|gb|AEJ07957.1|	3.8e-35	polyprotein [Sorghum propinquum]
TR220773_c1_g1_i1	2D	57580811	57584388	0.000627323	gi|326506412|dbj|BAJ86524.1|	3.71e-16	predicted protein, partial [Hordeum vulgare subsp. vulgare]
TR221379_c1_g2_i1	2D	132127474	132131970	0.0292264	gi|475623224|gb|EMT32143.1|	3.7e-06	Lysosomal beta glucosidase [Aegilops tauschii]
TR222404_c2_g1_i1	2D	3688296	3689811	0.033748	gi|475589649|gb|EMT21231.1|	0	Disease resistance protein RGA2 [Aegilops tauschii]
TR222621_c0_g1_i1	2D	57689999	57692377	0.0384025	gi|115473825|ref|NP_001060511.1|	0	Os07g0657400 [Oryza sativa Japonica Group]
TR222621_c0_g1_i7	2D	57689999	57692377	0.0136912	gi|125559459|gb|EAZ04995.1|	0	hypothetical protein OsI_27175 [Oryza sativa Indica Group]
TR223066_c0_g3_i2	2D	6983098	6984668	0.0059535	gi|475569550|gb|EMT15798.1|	3.06e-66	putative RuBisCO large subunit-binding protein subunit alpha, chloroplastic [Aegilops tauschii]
TR227161_c2_g3_i13	2D	54202831	54218384	0.00356203	gi|474051357|gb|EMS53660.1|	1.19e-74	Zinc finger Ran-binding domain-containing protein 3 [Triticum urartu]
TR229752_c0_g1_i1	2D	10898772	10901389	0.028878	gi|326523715|dbj|BAJ93028.1|	1.38e-136	predicted protein [Hordeum vulgare subsp. vulgare]
TR230091_c1_g1_i1	2D	82356614	82357429	0.0408368	gi|475587877|gb|EMT20682.1|	1.03e-170	hypothetical protein F775_19509 [Aegilops tauschii]
TR230149_c0_g1_i1	2D	81295628	81300017	0.0487949	gi|326496009|dbj|BAJ90626.1|	0	predicted protein [Hordeum vulgare subsp. vulgare]
TR231101_c2_g1_i1	2D	139923246	139927017	0.0382892	gi|357166288|ref|XP_003580661.1|	0	PREDICTED: glutamyl-tRNA(Gln) amidotransferase subunit A, chloroplastic/mitochondrial [Brachypodium distachyon]
TR234806_c0_g2_i3	2D	144010926	144012907	0.00208826	gi|473875549|gb|EMS47856.1|	0	putative glutathione S-transferase [Triticum urartu]
TR238703_c0_g1_i1	2D	29181689	29184363	0.0192943	gi|326493098|dbj|BAJ85010.1|	0	predicted protein [Hordeum vulgare subsp. vulgare]
TR86211_c0_g1_i1	2D	4763846	4765200	0.008555	gi|474394331|gb|EMS65582.1|	3.33e-12	Cytochrome P450 99A2 [Triticum urartu]
TCONS_00052918	3A	461254	463981	0.031751	gi|474386647|gb|EMS65047.1|	0	L-type lectin-domain containing receptor kinase IV.2 [Triticum urartu]
TCONS_00052991	3A	2243514	2243741	0.0369998	gi|326522845|dbj|BAJ88468.1|	0	predicted protein [Hordeum vulgare subsp. vulgare]
TCONS_00053200	3A	11426313	11426492	0.00110283	gi|474410366|gb|EMS66783.1|	2.61e-33	hypothetical protein TRIUR3_15770 [Triticum urartu]
TCONS_00053424	3A	19096034	19097642	0.010269	gi|475572686|gb|EMT16569.1|	1.22e-21	IAA-alanine resistance protein 1 [Aegilops tauschii]
TCONS_00053426	3A	19326297	19326442	0.0221846	gi|473882071|gb|EMS48004.1|	0	hypothetical protein TRIUR3_21977 [Triticum urartu]
TCONS_00053479	3A	24560021	24560671	0.0332389	gi|473983668|gb|EMS51636.1|	2.56e-28	hypothetical protein TRIUR3_10394 [Triticum urartu]
TCONS_00054161	3A	95223591	95224945	0.047008	NA	NA	NA
TCONS_00054249	3A	103556630	103556872	0.00974551	gi|474063966|gb|EMS54086.1|	0	Ubiquitin fusion degradation protein 1-like protein [Triticum urartu]
TCONS_00054302	3A	107393377	107393478	0.0230969	gi|669029332|emb|CDM83502.1|	3.72e-167	unnamed protein product [Triticum aestivum]
TCONS_00054398	3A	123468174	123468318	0.0371686	gi|474107820|gb|EMS55490.1|	1.18e-177	Glycerol-3-phosphate dehydrogenase [NAD(P)+] [Triticum urartu]
TCONS_00054441	3A	127783423	127783456	0.0175847	gi|475613169|gb|EMT28674.1|	1.53e-09	hypothetical protein F775_24239 [Aegilops tauschii]
TCONS_00054456	3A	128981949	128982679	0.0299834	gi|256009780|gb|ACU54987.1|	3.24e-104	secretory carrier membrane protein [Triticum aestivum]
TCONS_00054496	3A	133092016	133092604	0.0407077	gi|474123875|gb|EMS56139.1|	0	ABC transporter B family member 4 [Triticum urartu]
TCONS_00054497	3A	133092085	133092604	0.000636488	gi|474123875|gb|EMS56139.1|	0	ABC transporter B family member 4 [Triticum urartu]
TCONS_00054545	3A	135579812	135579876	0.0150772	gi|474372325|gb|EMS63935.1|	5.75e-38	hypothetical protein TRIUR3_06425 [Triticum urartu]
TCONS_00054635	3A	140396516	140398004	0.0497409	gi|474397685|gb|EMS65813.1|	0	Diacylglycerol kinase iota [Triticum urartu]
TCONS_00054688	3A	143558092	143558194	0.0454131	gi|669030080|emb|CDM84487.1|	0	unnamed protein product [Triticum aestivum]
TCONS_00054816	3A	148674055	148674576	0.0233467	gi|326502776|dbj|BAJ99016.1|	1.59e-90	predicted protein [Hordeum vulgare subsp. vulgare]
TCONS_00054892	3A	153533740	153537027	0.0404163	gi|474308552|gb|EMS61825.1|	2.34e-89	Histidine-containing phosphotransfer protein 4 [Triticum urartu]
TCONS_00054951	3A	157175962	157176740	0.0433653	NA	NA	NA
TCONS_00055055	3A	160616874	160617097	0.00961774	gi|944074085|gb|KQK09569.1|	1.92e-102	hypothetical protein BRADI_2g48810 [Brachypodium distachyon]
TCONS_00055107	3A	162539212	162539320	0.0452824	gi|669030735|emb|CDM85371.1|	2.91e-143	unnamed protein product [Triticum aestivum]
TCONS_00055138	3A	163023413	163024654	0.0225904	gi|669030728|emb|CDM85361.1|	2.26e-130	unnamed protein product [Triticum aestivum]
TCONS_00055399	3A	176947467	176948325	0.0360078	gi|300681515|emb|CBH32609.1|	1.35e-121	glucan endo-1,3-beta-glucosidase GII precursor,putative, expressed [Triticum aestivum]
TCONS_00055673	3A	3128089	3128950	0.023572	gi|383100791|emb|CCG48022.1|	0	conserved hypothetical protein, expressed [Triticum aestivum]
TCONS_00055774	3A	6852279	6853017	0.00103673	gi|669027287|emb|CDM80597.1|	0	unnamed protein product [Triticum aestivum]
TCONS_00055789	3A	7576676	7577381	0.0366684	gi|2492487|sp|Q43470.1|1433B_HORVU	0	RecName: Full=14-3-3-like protein B; Short=14-3-3B
TCONS_00055825	3A	8722688	8723784	0.00746486	gi|475565430|gb|EMT14789.1|	0	Zeamatin [Aegilops tauschii]
TCONS_00055912	3A	11560807	11561262	0.00343777	gi|326510303|dbj|BAJ87368.1|	0	predicted protein [Hordeum vulgare subsp. vulgare]
TCONS_00055952	3A	12513774	12514382	0.0118775	gi|473996831|gb|EMS52096.1|	0	Aspartyl-tRNA synthetase [Triticum urartu]
TCONS_00056042	3A	14861980	14862559	0.022526	gi|475614431|gb|EMT29080.1|	1.57e-31	hypothetical protein F775_04312 [Aegilops tauschii]
TCONS_00056047	3A	14892608	14893078	1.03e-59	gi|326514334|dbj|BAJ96154.1|	4.88e-14	predicted protein, partial [Hordeum vulgare subsp. vulgare]
TCONS_00056209	3A	26547808	26553185	0.0340103	gi|669028269|emb|CDM82015.1|	0	unnamed protein product [Triticum aestivum]
TCONS_00056252	3A	28601429	28602116	0.00452602	gi|474394810|gb|EMS65612.1|	0	Uroporphyrinogen decarboxylase 1, chloroplastic [Triticum urartu]
TCONS_00056257	3A	29620883	29621303	0.0151245	gi|326494576|dbj|BAJ94407.1|	0	predicted protein [Hordeum vulgare subsp. vulgare]
TCONS_00056330	3A	36907907	36908562	0.000776918	gi|473964976|gb|EMS51225.1|	4.6e-115	Eukaryotic translation initiation factor 6-2 [Triticum urartu]
TCONS_00056459	3A	58657186	58658095	0.0143343	gi|326510273|dbj|BAJ87353.1|	9.24e-171	predicted protein, partial [Hordeum vulgare subsp. vulgare]
TCONS_00056484	3A	58936310	58937891	0.0115701	NA	NA	NA
TCONS_00056665	3A	80031674	80031934	0.0119879	gi|475578066|gb|EMT18004.1|	1.71e-40	hypothetical protein F775_29254 [Aegilops tauschii]
TCONS_00057091	3A	122686231	122687548	0.0135186	gi|326506102|dbj|BAJ91290.1|	0	predicted protein [Hordeum vulgare subsp. vulgare]
TCONS_00057092	3A	122686497	122687641	0.00280852	gi|326506102|dbj|BAJ91290.1|	0	predicted protein [Hordeum vulgare subsp. vulgare]
TCONS_00057419	3A	146255992	146256824	0.0262504	NA	NA	NA
TCONS_00057520	3A	151756228	151756429	0.0194205	gi|475577050|gb|EMT17702.1|	2.29e-96	Subtilisin-like protease [Aegilops tauschii]
TCONS_00057557	3A	153740748	153740902	0.00879232	gi|669029766|emb|CDM84083.1|	1.92e-79	unnamed protein product [Triticum aestivum]
TCONS_00057579	3A	154062925	154063331	0.0422008	gi|669029769|emb|CDM84086.1|	2.8e-92	unnamed protein product [Triticum aestivum]
TCONS_00057765	3A	160744352	160744696	0.00304929	gi|669030707|emb|CDM85329.1|	2.61e-133	unnamed protein product [Triticum aestivum]
TCONS_00057936	3A	168847789	168848183	0.0351289	gi|326494402|dbj|BAJ90470.1|	1.35e-36	predicted protein [Hordeum vulgare subsp. vulgare]
TCONS_00058191	3A	182387295	182387690	0.0483896	gi|473837097|gb|EMS47210.1|	1.1e-27	hypothetical protein TRIUR3_01585 [Triticum urartu]
TCONS_00058452	3A	41723089	41724376	0.038502	gi|474111011|gb|EMS55590.1|	7.02e-32	Tryptophanyl-tRNA synthetase, cytoplasmic [Triticum urartu]
TCONS_00058461	3A	45460614	45461356	0.0355583	NA	NA	NA
TR102378_c0_g1_i2	3A	49827125	49827411	0.000662983	gi|669029345|emb|CDM83517.1|	2.75e-35	unnamed protein product [Triticum aestivum]
TR126015_c0_g1_i2	3A	94100405	94100658	0.0427149	gi|475544965|gb|EMT10416.1|	1.01e-49	hypothetical protein F775_00883 [Aegilops tauschii]
TR127033_c0_g1_i1	3A	24600624	24603436	0.0260615	gi|474384554|gb|EMS64828.1|	0	hypothetical protein TRIUR3_08819 [Triticum urartu]
TR13755_c0_g1_i1	3A	349087	351740	0.000154584	gi|475525806|gb|EMT07216.1|	0	hypothetical protein F775_17411 [Aegilops tauschii]
TR148336_c0_g1_i2	3A	154066527	154069515	0.00590627	gi|326530133|dbj|BAK08346.1|	0	predicted protein, partial [Hordeum vulgare subsp. vulgare]
TR150011_c0_g2_i1	3A	162903176	162906293	0.000225722	gi|475623822|gb|EMT32384.1|	0	hypothetical protein F775_18628 [Aegilops tauschii]
TR152529_c0_g1_i3	3A	122686497	122690416	0.0142111	gi|326506102|dbj|BAJ91290.1|	0	predicted protein [Hordeum vulgare subsp. vulgare]
TR157608_c0_g1_i8	3A	179877050	179882761	0.0194966	gi|326501190|dbj|BAJ98826.1|	0	predicted protein, partial [Hordeum vulgare subsp. vulgare]
TR164774_c0_g1_i6	3A	2243514	2248083	0.0169718	gi|326515584|dbj|BAK07038.1|	8.35e-136	predicted protein [Hordeum vulgare subsp. vulgare]
TR168516_c0_g1_i2	3A	95161553	95162391	0.0111525	gi|473930020|gb|EMS49917.1|	9.84e-81	50S ribosomal protein L31, chloroplastic [Triticum urartu]
TR169939_c0_g1_i1	3A	182331520	182335213	0.041019	gi|326507910|dbj|BAJ86698.1|	0	predicted protein [Hordeum vulgare subsp. vulgare]
TR169987_c0_g1_i2	3A	11321313	11323615	0.0314426	gi|474308957|gb|EMS61855.1|	0	hypothetical protein TRIUR3_23380 [Triticum urartu]
TR170896_c0_g1_i2	3A	143515404	143516725	0.0362654	gi|669028958|emb|CDM82957.1|	1.87e-140	unnamed protein product [Triticum aestivum]
TR178034_c1_g1_i3	3A	12880275	12882861	0.0316242	gi|669027798|emb|CDM81367.1|	0	unnamed protein product [Triticum aestivum]
TR178034_c1_g1_i7	3A	12880275	12882861	0.0431964	gi|669027798|emb|CDM81367.1|	0	unnamed protein product [Triticum aestivum]
TR179045_c0_g1_i5	3A	127754911	127755874	0.0393025	gi|475581698|gb|EMT18917.1|	1.85e-78	hypothetical protein F775_22329 [Aegilops tauschii]
TR183027_c5_g1_i1	3A	164569748	164572240	0.00389154	gi|669030788|emb|CDM85449.1|	0	unnamed protein product [Triticum aestivum]
TR190616_c1_g3_i3	3A	58858002	58859175	0.0240803	NA	NA	NA
TR197682_c2_g2_i1	3A	162751045	162752687	0.00815683	gi|474273141|gb|EMS60950.1|	5.44e-74	U-box domain-containing protein 6 [Triticum urartu]
TR202300_c0_g1_i2	3A	151288143	151290339	0.017728	gi|944242090|gb|KQL06398.1|	1.39e-33	hypothetical protein SETIT_004846mg, partial [Setaria italica]
TR203670_c0_g2_i2	3A	3078346	3078904	0.0357983	gi|474394561|gb|EMS65590.1|	2.94e-123	hypothetical protein TRIUR3_21288 [Triticum urartu]
TR211302_c0_g1_i3	3A	91934036	91935673	0.0328181	gi|475600899|gb|EMT24679.1|	0	hypothetical protein F775_31894 [Aegilops tauschii]
TR214309_c1_g8_i9	3A	8301395	8306199	0.00576181	gi|475565430|gb|EMT14789.1|	1.73e-88	Zeamatin [Aegilops tauschii]
TR220811_c2_g2_i2	3A	1409739	1410272	0.00815059	gi|474219608|gb|EMS59205.1|	0	Putative serine/threonine-protein kinase-like protein CCR3 [Triticum urartu]
TR225410_c0_g2_i1	3A	90460704	90466639	0.0199366	gi|669029462|emb|CDM83663.1|	2.46e-172	unnamed protein product [Triticum aestivum]
TR226588_c1_g1_i1	3A	119755195	119758135	0.0465371	gi|669030763|emb|CDM85413.1|	6.09e-37	unnamed protein product [Triticum aestivum]
TR237587_c0_g1_i10	3A	135722467	135724919	0.0177641	gi|326491321|dbj|BAK05760.1|	0	predicted protein [Hordeum vulgare subsp. vulgare]
TR237974_c8_g4_i18	3A	115181810	115187118	0.0321395	NA	NA	NA
TR78417_c0_g1_i1	3A	168622373	168624252	0.00227704	gi|326521338|dbj|BAJ96872.1|	0	predicted protein [Hordeum vulgare subsp. vulgare]
TR78938_c0_g2_i3	3A	175738051	175739225	0.000387195	gi|326508070|dbj|BAJ86778.1|	0	predicted protein [Hordeum vulgare subsp. vulgare]
TCONS_00058868	3B	644616	644834	0.0150255	gi|669026893|emb|CDM80000.1|	2.68e-145	unnamed protein product [Triticum aestivum]
TCONS_00058891	3B	968873	969093	0.00727149	gi|669026904|emb|CDM80015.1|	2.43e-94	unnamed protein product [Triticum aestivum]
TCONS_00059104	3B	9233397	9235437	0.00588249	gi|474219608|gb|EMS59205.1|	0	Putative serine/threonine-protein kinase-like protein CCR3 [Triticum urartu]
TCONS_00059189	3B	12085261	12085294	1.03e-59	gi|475545875|gb|EMT10556.1|	0	Putative receptor-like protein kinase [Aegilops tauschii]
TCONS_00059299	3B	17402427	17403248	0.00391102	gi|669027189|emb|CDM80453.1|	3.42e-168	unnamed protein product [Triticum aestivum]
TCONS_00059407	3B	24942563	24942799	4.12e-05	gi|669027287|emb|CDM80597.1|	0	unnamed protein product [Triticum aestivum]
TCONS_00059626	3B	36589409	36591478	0.00325932	gi|110289497|gb|ABB47941.2|	1.21e-62	retrotransposon protein, putative, unclassified [Oryza sativa Japonica Group]
TCONS_00059687	3B	40269231	40269601	0.0433914	gi|669027489|emb|CDM80881.1|	0	unnamed protein product [Triticum aestivum]
TCONS_00059755	3B	41050450	41050648	0.027958	gi|326526427|dbj|BAJ97230.1|	0	predicted protein [Hordeum vulgare subsp. vulgare]
TCONS_00060042	3B	58499661	58499942	0.00269116	gi|669027660|emb|CDM81174.1|	8.52e-118	unnamed protein product [Triticum aestivum]
TCONS_00060044	3B	58499703	58499942	0.0334969	gi|669027660|emb|CDM81174.1|	2.35e-81	unnamed protein product [Triticum aestivum]
TCONS_00060193	3B	66116444	66118372	0.0113533	gi|669027734|emb|CDM81285.1|	0	unnamed protein product [Triticum aestivum]
TCONS_00060278	3B	71084597	71084865	0.0273731	gi|669027780|emb|CDM81342.1|	2.46e-83	unnamed protein product [Triticum aestivum]
TCONS_00060441	3B	80969564	80970307	0.0179232	gi|473792907|gb|EMS46365.1|	0	Pattern formation protein EMB30 [Triticum urartu]
TCONS_00060587	3B	87699206	87699483	0.0190458	gi|357126570|ref|XP_003564960.1|	1.53e-141	PREDICTED: uncharacterized protein LOC100826428 isoform X2 [Brachypodium distachyon]
TCONS_00061057	3B	125770086	125770391	0.0272042	gi|475561254|gb|EMT13739.1|	0	Putative serine incorporator [Aegilops tauschii]
TCONS_00061310	3B	146427039	146427813	0.0468629	gi|669028270|emb|CDM82016.1|	3.91e-85	unnamed protein product [Triticum aestivum]
TCONS_00061388	3B	151273454	151273666	0.0152196	gi|669028306|emb|CDM82063.1|	0	unnamed protein product [Triticum aestivum]
TCONS_00061426	3B	154966568	154967070	0.0367368	gi|669028336|emb|CDM82102.1|	0	unnamed protein product [Triticum aestivum]
TCONS_00061562	3B	166669504	166670217	0.00973041	gi|669028398|emb|CDM82181.1|	1.43e-77	unnamed protein product [Triticum aestivum]
TCONS_00061841	3B	192114244	192116641	0.0497156	gi|573923648|ref|XP_006649398.1|	2.58e-45	PREDICTED: pheophorbide a oxygenase, chloroplastic-like [Oryza brachyantha]
TCONS_00061915	3B	200801315	200803410	0.0121028	gi|669028606|emb|CDM82473.1|	7.11e-49	unnamed protein product [Triticum aestivum]
TCONS_00062069	3B	216789819	216790006	0.0215356	gi|475583464|gb|EMT19466.1|	0	hypothetical protein F775_00448 [Aegilops tauschii]
TCONS_00062114	3B	221233324	221233999	0.0385931	gi|319759284|gb|ADV71378.1|	0	ABC1 protein kinase [Triticum aestivum]
TCONS_00062253	3B	234799281	234799488	0.00826751	gi|475595520|gb|EMT23064.1|	1.03e-152	Hydroxyisourate hydrolase [Aegilops tauschii]
TCONS_00062289	3B	236337245	236337685	0.0407525	gi|669028878|emb|CDM82843.1|	3.58e-31	unnamed protein product [Triticum aestivum]
TCONS_00062346	3B	242994744	242994898	0.0400143	gi|669028795|emb|CDM82721.1|	0	unnamed protein product [Triticum aestivum]
TCONS_00062620	3B	265868559	265868837	0.0103974	gi|669028906|emb|CDM82880.1|	0	unnamed protein product [Triticum aestivum]
TCONS_00063301	3B	341730103	341730367	0.0244601	gi|669029026|emb|CDM83060.1|	0	unnamed protein product [Triticum aestivum]
TCONS_00063689	3B	384572131	384573025	0.0223125	gi|474400665|gb|EMS66056.1|	5.5e-08	U-box domain-containing protein 52 [Triticum urartu]
TCONS_00063751	3B	391688794	391689639	0.00464447	gi|944073868|gb|KQK09352.1|	1.48e-140	hypothetical protein BRADI_2g47490 [Brachypodium distachyon]
TCONS_00063765	3B	393071848	393072758	0.00538527	gi|669029196|emb|CDM83320.1|	0	unnamed protein product [Triticum aestivum]
TCONS_00064282	3B	432589433	432589548	0.028552	gi|474073085|gb|EMS54441.1|	2.74e-128	60S ribosomal protein L18a [Triticum urartu]
TCONS_00064478	3B	452802187	452803479	0.00726169	gi|326493950|dbj|BAJ85437.1|	0	predicted protein, partial [Hordeum vulgare subsp. vulgare]
TCONS_00064479	3B	452828028	452828690	0.022627	gi|669029497|emb|CDM83713.1|	0	unnamed protein product [Triticum aestivum]
TCONS_00064511	3B	453123830	453124552	0.00176256	gi|669029499|emb|CDM83719.1|	0	unnamed protein product [Triticum aestivum]
TCONS_00064561	3B	456558776	456559026	0.0369742	gi|669029194|emb|CDM83317.1|	2.8e-66	unnamed protein product [Triticum aestivum]
TCONS_00064569	3B	457439121	457440050	0.0165341	gi|326492856|dbj|BAJ90284.1|	1.25e-15	predicted protein [Hordeum vulgare subsp. vulgare]
TCONS_00064646	3B	460470586	460471053	0.0368711	gi|669029535|emb|CDM83773.1|	0	unnamed protein product [Triticum aestivum]
TCONS_00064792	3B	472118160	472118478	0.003918	gi|669029600|emb|CDM83858.1|	1.02e-162	unnamed protein product [Triticum aestivum]
TCONS_00064938	3B	488690817	488691877	0.00634266	gi|326512844|dbj|BAK03329.1|	0	predicted protein [Hordeum vulgare subsp. vulgare]
TCONS_00065019	3B	493879666	493881210	0.0318245	gi|669029711|emb|CDM84001.1|	0	unnamed protein product [Triticum aestivum]
TCONS_00065074	3B	500012147	500014785	0.0395267	gi|669029742|emb|CDM84044.1|	5.62e-59	unnamed protein product [Triticum aestivum]
TCONS_00065159	3B	505344949	505345305	0.0464978	gi|669029769|emb|CDM84086.1|	3.8e-133	unnamed protein product [Triticum aestivum]
TCONS_00065236	3B	510113966	510114132	0.00547547	gi|474302840|gb|EMS61680.1|	1.12e-86	La-related protein 6 [Triticum urartu]
TCONS_00065705	3B	549563933	549564341	0.0248143	gi|326494668|dbj|BAJ94453.1|	5.51e-72	predicted protein [Hordeum vulgare subsp. vulgare]
TCONS_00065971	3B	568248371	568250108	0.00415621	gi|474392083|gb|EMS65442.1|	1.94e-49	60S ribosomal protein L10a-1 [Triticum urartu]
TCONS_00066092	3B	576077621	576077931	0.0259773	gi|475581276|gb|EMT18787.1|	8.69e-38	hypothetical protein F775_04024 [Aegilops tauschii]
TCONS_00066123	3B	579432331	579432826	0.048431	gi|669030283|emb|CDM84759.1|	0	unnamed protein product [Triticum aestivum]
TCONS_00066127	3B	580155305	580155756	0.00865667	gi|669030286|emb|CDM84763.1|	0	unnamed protein product [Triticum aestivum]
TCONS_00066334	3B	599433811	599434062	0.00217543	gi|669030387|emb|CDM84897.1|	1.55e-49	unnamed protein product [Triticum aestivum]
TCONS_00067028	3B	644501317	644511622	0.0469079	gi|473808492|gb|EMS46736.1|	1.27e-146	Pumilio-like protein 1 [Triticum urartu]
TCONS_00067057	3B	646112584	646113197	0.0135463	gi|669030697|emb|CDM85319.1|	4.24e-78	unnamed protein product [Triticum aestivum]
TCONS_00067190	3B	655296449	655296705	0.00178036	gi|474363106|gb|EMS63350.1|	1.12e-12	hypothetical protein TRIUR3_07771 [Triticum urartu]
TCONS_00067573	3B	680186378	680186394	0.0418095	gi|669031006|emb|CDM85744.1|	0	unnamed protein product [Triticum aestivum]
TCONS_00067586	3B	680664448	680664636	0.014749	gi|669031012|emb|CDM85752.1|	0	unnamed protein product [Triticum aestivum]
TCONS_00067803	3B	698397098	698397364	0.0247795	gi|669031126|emb|CDM85908.1|	0	unnamed protein product [Triticum aestivum]
TCONS_00067837	3B	701144898	701145344	0.0168732	gi|669031154|emb|CDM85949.1|	2.77e-65	unnamed protein product [Triticum aestivum]
TCONS_00067919	3B	705751953	705755227	0.0117908	NA	NA	NA
TCONS_00067921	3B	705754539	705755227	0.0482309	gi|475611361|gb|EMT28059.1|	2.49e-13	hypothetical protein F775_05928 [Aegilops tauschii]
TCONS_00068370	3B	737056634	737056767	0.0391375	gi|669031478|emb|CDM86477.1|	3.62e-132	unnamed protein product [Triticum aestivum]
TCONS_00068601	3B	749998842	749999011	0.0317209	gi|326501514|dbj|BAK02546.1|	2.59e-45	predicted protein [Hordeum vulgare subsp. vulgare]
TCONS_00068670	3B	751060495	751060942	0.0124347	NA	NA	NA
TCONS_00068937	3B	761016461	761016644	0.0275621	gi|669031792|emb|CDM86948.1|	1.6e-159	unnamed protein product [Triticum aestivum]
TCONS_00069265	3B	773026711	773028552	0.002481	gi|669027880|emb|CDM81470.1|	1.04e-55	unnamed protein product [Triticum aestivum]
TCONS_00069411	3B	4095378	4096293	0.000708665	gi|669026976|emb|CDM80112.1|	0	unnamed protein product [Triticum aestivum]
TCONS_00069591	3B	11070491	11071424	0.0451383	NA	NA	NA
TCONS_00069618	3B	12115452	12116048	0.0344737	gi|669027100|emb|CDM80314.1|	0	unnamed protein product [Triticum aestivum]
TCONS_00069706	3B	14839182	14839531	0.0486825	gi|669027144|emb|CDM80388.1|	0	unnamed protein product [Triticum aestivum]
TCONS_00069760	3B	17317775	17319724	0.000772186	gi|474268389|gb|EMS60775.1|	5.03e-74	E3 ubiquitin-protein ligase EL5 [Triticum urartu]
TCONS_00069851	3B	21371948	21373260	0.00695821	gi|326522416|dbj|BAK07670.1|	0	predicted protein [Hordeum vulgare subsp. vulgare]
TCONS_00069894	3B	24667764	24668292	0.00185856	gi|669027287|emb|CDM80597.1|	0	unnamed protein product [Triticum aestivum]
TCONS_00069895	3B	24764689	24765057	0.000204671	gi|669027280|emb|CDM80590.1|	0	unnamed protein product [Triticum aestivum]
TCONS_00069908	3B	25540516	25541058	0.00290319	gi|669027309|emb|CDM80622.1|	0	unnamed protein product [Triticum aestivum]
TCONS_00070592	3B	63409006	63411492	0.0220431	gi|669027708|emb|CDM81254.1|	0	unnamed protein product [Triticum aestivum]
TCONS_00070708	3B	71333431	71334330	0.0118225	gi|669027784|emb|CDM81347.1|	0	unnamed protein product [Triticum aestivum]
TCONS_00070975	3B	89912348	89913398	1.03e-59	gi|351726084|ref|NP_001238394.1|	8.91e-08	uncharacterized protein LOC100499945 [Glycine max]
TCONS_00071059	3B	94947366	94947810	0.0173202	gi|669027970|emb|CDM81608.1|	0	unnamed protein product [Triticum aestivum]
TCONS_00071129	3B	103542046	103542305	0.0193881	gi|669028009|emb|CDM81660.1|	5.1e-175	unnamed protein product [Triticum aestivum]
TCONS_00071397	3B	126538719	126539670	0.0493517	gi|669028147|emb|CDM81839.1|	0	unnamed protein product [Triticum aestivum]
TCONS_00071609	3B	144130175	144131170	0.0286962	gi|669028252|emb|CDM81993.1|	0	unnamed protein product [Triticum aestivum]
TCONS_00071890	3B	165302438	165302842	0.0498512	NA	NA	NA
TCONS_00072125	3B	184495716	184496478	0.000724724	gi|326510349|dbj|BAJ87391.1|	0	predicted protein [Hordeum vulgare subsp. vulgare]
TCONS_00072577	3B	241386128	241403543	0.00900766	gi|99866706|gb|ABF67921.1|	9.75e-145	Ji1 putative pol protein [Zea mays]
TCONS_00072826	3B	262454184	262454942	0.0118315	gi|669028889|emb|CDM82858.1|	3.05e-29	unnamed protein product [Triticum aestivum]
TCONS_00073457	3B	364811999	364819445	0.0106823	gi|669029263|emb|CDM83417.1|	0	unnamed protein product [Triticum aestivum]
TCONS_00073585	3B	377424680	377426748	0.0103697	gi|475541880|gb|EMT09863.1|	9.47e-59	Graves disease carrier protein-like protein [Aegilops tauschii]
TCONS_00073977	3B	413873915	413874277	0.000896871	gi|669029285|emb|CDM83444.1|	0	unnamed protein product [Triticum aestivum]
TCONS_00073980	3B	414167040	414167693	0.00454606	gi|669029286|emb|CDM83445.1|	0	unnamed protein product [Triticum aestivum]
TCONS_00074073	3B	422096508	422097023	0.0386776	gi|669029332|emb|CDM83502.1|	0	unnamed protein product [Triticum aestivum]
TCONS_00074255	3B	444566380	444566802	0.0334946	gi|669029447|emb|CDM83646.1|	0	unnamed protein product [Triticum aestivum]
TCONS_00074356	3B	453020003	453020513	0.00902504	gi|474186473|gb|EMS57956.1|	6.88e-08	MATE efflux family protein 5 [Triticum urartu]
TCONS_00074389	3B	453125697	453126136	0.000720771	gi|474312041|gb|EMS61961.1|	1.79e-20	hypothetical protein TRIUR3_19240 [Triticum urartu]
TCONS_00074402	3B	455662173	455662710	0.028314	gi|669029501|emb|CDM83721.1|	0	unnamed protein product [Triticum aestivum]
TCONS_00074452	3B	459192128	459195365	0.00317366	gi|669029524|emb|CDM83759.1|	0	unnamed protein product [Triticum aestivum]
TCONS_00074597	3B	471367918	471368283	0.0380662	gi|721634320|ref|XP_010230838.1|	5.49e-106	PREDICTED: serine/arginine-rich splicing factor SR30-like isoform X2 [Brachypodium distachyon]
TCONS_00074641	3B	476804263	476805564	0.0378552	gi|297597401|ref|NP_001043925.2|	0	Os01g0689900 [Oryza sativa Japonica Group]
TCONS_00074642	3B	476805105	476810328	0.0270264	gi|326515174|dbj|BAK03500.1|	0	predicted protein, partial [Hordeum vulgare subsp. vulgare]
TCONS_00074694	3B	479993679	479993774	0.0280144	gi|669028397|emb|CDM82180.1|	9.21e-169	unnamed protein product [Triticum aestivum]
TCONS_00074835	3B	495261251	495262133	0.0305694	gi|669029720|emb|CDM84012.1|	0	unnamed protein product [Triticum aestivum]
TCONS_00074908	3B	504050924	504051142	0.0367781	gi|218189008|gb|EEC71435.1|	3.9e-168	hypothetical protein OsI_03633 [Oryza sativa Indica Group]
TCONS_00074931	3B	505334517	505335420	0.0183378	gi|669029768|emb|CDM84085.1|	2.79e-167	unnamed protein product [Triticum aestivum]
TCONS_00075175	3B	526107455	526108189	0.0324248	gi|669029896|emb|CDM84251.1|	5.61e-126	unnamed protein product [Triticum aestivum]
TCONS_00075534	3B	549317134	549317551	0.0396509	gi|669030072|emb|CDM84477.1|	2.12e-162	unnamed protein product [Triticum aestivum]
TCONS_00075636	3B	561153821	561153942	0.0318892	gi|669030149|emb|CDM84579.1|	0	unnamed protein product [Triticum aestivum]
TCONS_00075790	3B	575023999	575024416	0.00455982	gi|669030259|emb|CDM84727.1|	1.28e-134	unnamed protein product [Triticum aestivum]
TCONS_00075982	3B	586997852	586998101	0.0101298	gi|326502632|dbj|BAJ98944.1|	0	predicted protein [Hordeum vulgare subsp. vulgare]
TCONS_00075997	3B	587904549	587904887	0.028006	gi|669030331|emb|CDM84827.1|	2.2e-166	unnamed protein product [Triticum aestivum]
TCONS_00076147	3B	604474664	604482474	0.00367968	gi|32141364|gb|AAP74646.1|	1.11e-80	unknown [Aegilops tauschii]
TCONS_00076182	3B	608414787	608416683	0.0194184	gi|238908983|gb|ACF87376.2|	0	unknown [Zea mays]
TCONS_00076273	3B	616395812	616397173	0.0468307	gi|300681429|emb|CBH32521.1|	0	protein kinase, putative, expressed [Triticum aestivum]
TCONS_00076609	3B	644399756	644404001	0.0204434	gi|326511064|dbj|BAJ91879.1|	1.84e-166	predicted protein, partial [Hordeum vulgare subsp. vulgare]
TCONS_00076743	3B	652230739	652232510	0.0121113	gi|669030752|emb|CDM85395.1|	1.78e-48	unnamed protein product [Triticum aestivum]
TCONS_00076755	3B	652794024	652794445	0.0410782	gi|669030756|emb|CDM85401.1|	3.01e-173	unnamed protein product [Triticum aestivum]
TCONS_00076756	3B	652794024	652794445	0.0221194	gi|669030756|emb|CDM85401.1|	0	unnamed protein product [Triticum aestivum]
TCONS_00076772	3B	653252925	653253256	0.0111115	gi|478213512|gb|AGI92782.1|	1.28e-142	RLP1.813 [Triticum aestivum]
TCONS_00076774	3B	653253133	653253256	0.00566979	gi|478213512|gb|AGI92782.1|	8.11e-118	RLP1.813 [Triticum aestivum]
TCONS_00077151	3B	679796286	679796442	0.00101744	gi|669031000|emb|CDM85735.1|	0	unnamed protein product [Triticum aestivum]
TCONS_00077234	3B	689290444	689290771	0.0123928	gi|669031051|emb|CDM85809.1|	9.07e-64	unnamed protein product [Triticum aestivum]
TCONS_00077474	3B	705752776	705752976	0.0209257	NA	NA	NA
TCONS_00077797	3B	728624666	728625775	0.0444554	gi|300681514|emb|CBH32608.1|	0	glucan endo-1,3-beta-glucosidase GII precursor,putative, expressed [Triticum aestivum]
TCONS_00078093	3B	741286691	741287446	0.00682199	gi|669031551|emb|CDM86587.1|	1.3e-67	unnamed protein product [Triticum aestivum]
TCONS_00078094	3B	741286691	741287446	0.00944863	gi|669031551|emb|CDM86587.1|	9.73e-97	unnamed protein product [Triticum aestivum]
TCONS_00078210	3B	747855257	747855709	0.0168862	gi|669031612|emb|CDM86677.1|	0	unnamed protein product [Triticum aestivum]
TCONS_00078230	3B	749461214	749461709	0.0253716	gi|357125220|ref|XP_003564293.1|	2.77e-18	PREDICTED: probable beta-1,3-galactosyltransferase 19 [Brachypodium distachyon]
TCONS_00078349	3B	759060443	759060886	0.0488977	gi|669031760|emb|CDM86904.1|	1.01e-75	unnamed protein product [Triticum aestivum]
TCONS_00078602	3B	768884043	768884669	0.0342889	gi|669031888|emb|CDM87099.1|	0	unnamed protein product [Triticum aestivum]
TCONS_00078677	3B	770579648	770580144	0.0235692	gi|475545831|gb|EMT10549.1|	6.94e-149	hypothetical protein F775_07892 [Aegilops tauschii]
TCONS_00078809	3B	7556960	7558638	0.0426186	gi|474219611|gb|EMS59208.1|	0	Putative serine/threonine-protein kinase-like protein CCR3 [Triticum urartu]
TCONS_00078848	3B	38174693	38175790	0.00318663	gi|721650801|ref|XP_010233455.1|	1.48e-121	PREDICTED: uncharacterized protein LOC100839599 [Brachypodium distachyon]
TCONS_00078849	3B	38175882	38177253	0.0286776	gi|116308914|emb|CAH66045.1|	0	OSIGBa0107A02.6 [Oryza sativa Indica Group]
TCONS_00078878	3B	62052184	62052982	0.000465428	gi|937942331|dbj|BAT17243.1|	1.61e-98	Os12g0499874 [Oryza sativa Japonica Group]
TCONS_00078881	3B	62587519	62590217	5.92e-05	gi|473993295|gb|EMS51949.1|	1.2e-10	hypothetical protein TRIUR3_03638 [Triticum urartu]
TCONS_00078887	3B	69382821	69383678	1.32e-59	gi|475546600|gb|EMT10713.1|	1.21e-14	DNA topoisomerase 2 [Aegilops tauschii]
TCONS_00078968	3B	144651423	144652352	0.00105901	NA	NA	NA
TCONS_00078993	3B	172443502	172444867	0.0276328	NA	NA	NA
TCONS_00079014	3B	184966243	184967375	0.0481443	gi|474056531|gb|EMS53814.1|	8.4e-120	Auxilin-related protein 2 [Triticum urartu]
TCONS_00079116	3B	269791208	269792485	0.023199	gi|56155209|gb|AAV80394.1|	0	polyprotein [Hordeum vulgare subsp. vulgare]
TCONS_00079245	3B	392367078	392368272	0.0349435	gi|685385773|ref|XP_009124808.1|	3.87e-131	PREDICTED: uncharacterized protein LOC103849841, partial [Brassica rapa]
TCONS_00079287	3B	429955417	429956472	0.00845957	NA	NA	NA
TCONS_00079413	3B	560133535	560136683	0.0345841	gi|357131145|ref|XP_003567201.1|	0	PREDICTED: disease resistance protein At4g27190-like [Brachypodium distachyon]
TCONS_00079424	3B	572413377	572414395	0.0227013	NA	NA	NA
TCONS_00079440	3B	589030402	589033109	0.0157788	gi|474127647|gb|EMS56268.1|	4.05e-06	Lysine-specific histone demethylase 1A [Triticum urartu]
TCONS_00079469	3B	613146123	613147859	0.0046103	gi|721696511|ref|XP_010240743.1|	0	PREDICTED: uncharacterized protein LOC104585519 [Brachypodium distachyon]
TCONS_00079512	3B	648301147	648301592	0.022198	NA	NA	NA
TCONS_00079634	3B	741993487	741994160	0.00649196	gi|475601347|gb|EMT24799.1|	3.31e-54	Putative calcium-binding protein CML31 [Aegilops tauschii]
TCONS_00079635	3B	741998610	741999493	0.00157344	gi|473999523|gb|EMS52172.1|	8.74e-75	putative calcium-binding protein CML31 [Triticum urartu]
TR105338_c0_g4_i1	3B	535941057	535943773	0.0183827	gi|669029985|emb|CDM84367.1|	1.65e-19	unnamed protein product [Triticum aestivum]
TR105618_c0_g1_i1	3B	418188510	418188902	0.0163054	gi|669029299|emb|CDM83464.1|	1.51e-38	unnamed protein product [Triticum aestivum]
TR115876_c0_g2_i1	3B	68428544	68430536	0.0324182	gi|357126970|ref|XP_003565160.1|	8.64e-19	PREDICTED: suppressor of disruption of TFIIS-like [Brachypodium distachyon]
TR118824_c0_g1_i1	3B	119324960	119325127	0.0288679	NA	NA	NA
TR120254_c0_g1_i1	3B	714444317	714445843	0.000601643	gi|669031272|emb|CDM86147.1|	0	unnamed protein product [Triticum aestivum]
TR123485_c0_g1_i2	3B	530453676	530453984	0.0310539	gi|669029932|emb|CDM84290.1|	7.17e-17	unnamed protein product [Triticum aestivum]
TR128540_c0_g1_i1	3B	231628594	231630018	0.00635713	gi|669028718|emb|CDM82629.1|	3.23e-147	unnamed protein product [Triticum aestivum]
TR130194_c0_g2_i1	3B	589293456	589294839	0.0414139	gi|669030335|emb|CDM84831.1|	0	unnamed protein product [Triticum aestivum]
TR131013_c0_g1_i1	3B	608402732	608403569	0.0320386	gi|669030444|emb|CDM84973.1|	2.91e-27	unnamed protein product [Triticum aestivum]
TR143071_c0_g1_i2	3B	770462590	770464599	0.00936533	gi|475504821|gb|EMT04678.1|	0	11S globulin seed storage protein 2 [Aegilops tauschii]
TR148988_c1_g1_i1	3B	640780579	640784257	0.0108717	gi|166798219|gb|ABY89661.1|	2.68e-174	RING-finger domain containing protein [Triticum aestivum]
TR149659_c0_g1_i2	3B	499422345	499427415	0.0488228	gi|474144666|gb|EMS56731.1|	3.15e-100	Tryptophanyl-tRNA synthetase [Triticum urartu]
TR149659_c0_g1_i3	3B	499422345	499427415	0.0159094	gi|669029739|emb|CDM84041.1|	0	unnamed protein product [Triticum aestivum]
TR149667_c3_g2_i3	3B	476994952	476996162	0.0308802	gi|473895794|gb|EMS48969.1|	3.14e-146	hypothetical protein TRIUR3_06247 [Triticum urartu]
TR149707_c0_g1_i1	3B	364754438	364761293	0.0422538	gi|669029083|emb|CDM83155.1|	0	unnamed protein product [Triticum aestivum]
TR150393_c0_g2_i4	3B	773537666	773542133	0.00713899	gi|514785397|ref|XP_004970828.1|	1.95e-39	PREDICTED: ethylene-responsive transcription factor ERF020 [Setaria italica]
TR151265_c2_g1_i3	3B	770307194	770309544	0.00889973	gi|475545831|gb|EMT10549.1|	8.82e-161	hypothetical protein F775_07892 [Aegilops tauschii]
TR152215_c0_g1_i1	3B	532956339	532958239	0.0474636	gi|475584523|gb|EMT19794.1|	6.37e-58	hypothetical protein F775_32647 [Aegilops tauschii]
TR152472_c0_g1_i1	3B	507155916	507159650	0.00689249	gi|669029785|emb|CDM84106.1|	0	unnamed protein product [Triticum aestivum]
TR154421_c0_g1_i1	3B	216213468	216221019	0.0240192	gi|669028674|emb|CDM82565.1|	0	unnamed protein product [Triticum aestivum]
TR154700_c1_g1_i2	3B	30388603	30390093	0.0291798	gi|475586531|gb|EMT20319.1|	0	Disease resistance protein RGA2 [Aegilops tauschii]
TR154827_c3_g1_i5	3B	493879666	493881210	0.0462125	gi|669029711|emb|CDM84001.1|	4.36e-71	unnamed protein product [Triticum aestivum]
TR154983_c2_g1_i2	3B	579438467	579439482	0.0249012	gi|475602538|gb|EMT25163.1|	1.04e-172	Putative WRKY transcription factor 46 [Aegilops tauschii]
TR155546_c0_g1_i1	3B	634122153	634123870	0.0233066	gi|475556984|gb|EMT12737.1|	0	5&apos;-3&apos; exonuclease [Aegilops tauschii]
TR155546_c0_g1_i5	3B	634122153	634123870	0.0353098	gi|326522204|dbj|BAK04230.1|	0	predicted protein [Hordeum vulgare subsp. vulgare]
TR155825_c2_g1_i1	3B	203357622	203359502	0.0103562	gi|475560873|gb|EMT13656.1|	0	Lectin-domain containing receptor kinase A4.2 [Aegilops tauschii]
TR156648_c3_g4_i6	3B	261649645	261650598	0.0328576	gi|669028875|emb|CDM82839.1|	3.32e-115	unnamed protein product [Triticum aestivum]
TR159166_c0_g2_i6	3B	736567613	736568422	0.0109252	gi|475564403|gb|EMT14524.1|	3.4e-95	hypothetical protein F775_30165 [Aegilops tauschii]
TR159573_c0_g1_i1	3B	507768972	507770336	0.0120512	gi|669029793|emb|CDM84118.1|	2.2e-166	unnamed protein product [Triticum aestivum]
TR161171_c6_g1_i4	3B	391944197	391947570	0.04458	gi|110623255|emb|CAI94866.2|	8.35e-129	heat shock protein 101 [Triticum turgidum subsp. durum]
TR163531_c1_g1_i6	3B	453172920	453178268	0.020959	gi|669029501|emb|CDM83721.1|	0	unnamed protein product [Triticum aestivum]
TR164175_c0_g1_i1	3B	352093732	352095050	0.0163657	gi|475615412|gb|EMT29435.1|	0	Putative mitochondrial chaperone bcs1 [Aegilops tauschii]
TR164233_c0_g2_i1	3B	429740552	429741865	0.00466505	gi|475613551|gb|EMT28803.1|	0	hypothetical protein F775_32535 [Aegilops tauschii]
TR166070_c0_g1_i2	3B	581039393	581042149	0.0395308	NA	NA	NA
TR166457_c0_g1_i3	3B	459193171	459194598	0.000241117	gi|669029524|emb|CDM83759.1|	0	unnamed protein product [Triticum aestivum]
TR166457_c0_g1_i7	3B	459193171	459194598	0.000673968	gi|669029524|emb|CDM83759.1|	0	unnamed protein product [Triticum aestivum]
TR169698_c0_g1_i2	3B	259267937	259269722	0.00284283	gi|473842913|gb|EMS47349.1|	6.18e-65	hypothetical protein TRIUR3_27234 [Triticum urartu]
TR170707_c6_g2_i1	3B	211957156	211958136	0.0194293	gi|475544287|gb|EMT10299.1|	6.6e-50	hypothetical protein F775_52252 [Aegilops tauschii]
TR171487_c1_g1_i1	3B	98701031	98701537	0.0191154	gi|669027981|emb|CDM81625.1|	1.15e-29	unnamed protein product [Triticum aestivum]
TR172009_c0_g2_i1	3B	388150118	388151042	0.0306171	gi|669029170|emb|CDM83286.1|	7.31e-113	unnamed protein product [Triticum aestivum]
TR172241_c0_g1_i1	3B	485416071	485417452	0.0208604	gi|669029658|emb|CDM83937.1|	2.48e-91	unnamed protein product [Triticum aestivum]
TR172611_c1_g1_i5	3B	590240593	590241942	0.038806	gi|326498851|dbj|BAK02411.1|	2.79e-20	predicted protein [Hordeum vulgare subsp. vulgare]
TR172880_c0_g1_i3	3B	4735464	4735976	0.032946	gi|669026991|emb|CDM80144.1|	3.04e-65	unnamed protein product [Triticum aestivum]
TR172880_c0_g1_i5	3B	4735464	4735976	0.00644237	gi|475575635|gb|EMT17328.1|	2.6e-66	hypothetical protein F775_11485 [Aegilops tauschii]
TR174464_c0_g1_i1	3B	73356075	73359257	0.0366918	gi|669027802|emb|CDM81371.1|	0	unnamed protein product [Triticum aestivum]
TR174501_c1_g4_i1	3B	232687654	232689904	0.0135041	gi|440577528|emb|CBX45607.1|	0	GA2ox5-2 protein [Triticum aestivum]
TR174501_c1_g4_i4	3B	232687654	232689904	0.0473639	gi|440577528|emb|CBX45607.1|	1.17e-150	GA2ox5-2 protein [Triticum aestivum]
TR174900_c0_g1_i2	3B	87098174	87099604	0.0355953	gi|300719175|gb|ADK32530.1|	0	nucleotide pyrophosphatase/phosphodiesterase [Triticum aestivum]
TR175483_c0_g1_i1	3B	533921982	533925864	0.0249514	gi|669029969|emb|CDM84339.1|	9.32e-134	unnamed protein product [Triticum aestivum]
TR175737_c0_g1_i1	3B	464905384	464906100	0.0138222	gi|669029567|emb|CDM83812.1|	4.07e-74	unnamed protein product [Triticum aestivum]
TR176084_c0_g1_i8	3B	575051131	575051751	0.0346035	gi|474385113|gb|EMS64898.1|	7.66e-131	Protein LURP-one-related 8 [Triticum urartu]
TR176295_c1_g1_i2	3B	698397239	698408385	0.00312482	gi|475596373|gb|EMT23338.1|	0	Serine palmitoyltransferase 2 [Aegilops tauschii]
TR177634_c1_g1_i12	3B	697311653	697312627	0.00715203	gi|669031118|emb|CDM85893.1|	6.91e-86	unnamed protein product [Triticum aestivum]
TR180424_c1_g1_i4	3B	762150925	762152653	0.0421446	gi|473817153|gb|EMS46903.1|	1.04e-76	hypothetical protein TRIUR3_01226 [Triticum urartu]
TR181827_c1_g3_i1	3B	562201585	562202652	0.0281117	gi|475590918|gb|EMT21600.1|	6.26e-25	hypothetical protein F775_29369 [Aegilops tauschii]
TR182000_c2_g1_i2	3B	603775459	603775965	0.00563801	gi|326490786|dbj|BAJ90060.1|	7.73e-13	predicted protein [Hordeum vulgare subsp. vulgare]
TR182048_c2_g7_i1	3B	341730103	341738785	0.0117313	gi|669029026|emb|CDM83060.1|	1.62e-129	unnamed protein product [Triticum aestivum]
TR182447_c1_g1_i4	3B	583790173	583791298	0.0237355	gi|669030293|emb|CDM84777.1|	2.54e-142	unnamed protein product [Triticum aestivum]
TR183710_c3_g1_i7	3B	601367633	601369466	0.0339692	gi|669030398|emb|CDM84911.1|	7.11e-94	unnamed protein product [Triticum aestivum]
TR183717_c0_g2_i3	3B	259232670	259236297	0.00892252	gi|669028865|emb|CDM82820.1|	0	unnamed protein product [Triticum aestivum]
TR184152_c3_g1_i7	3B	741287095	741289563	0.0391063	gi|475590354|gb|EMT21445.1|	1.27e-139	Chitinase 8 [Aegilops tauschii]
TR184152_c3_g3_i1	3B	741287095	741289563	0.0237323	gi|359828772|gb|AEV76988.1|	7.12e-25	type A response regulator 4, partial [Triticum aestivum]
TR184249_c2_g1_i3	3B	10774947	10776715	0.0322222	gi|669027080|emb|CDM80282.1|	2.89e-164	unnamed protein product [Triticum aestivum]
TR187042_c1_g1_i1	3B	407621365	407621919	0.00351331	gi|669029247|emb|CDM83398.1|	2.87e-49	unnamed protein product [Triticum aestivum]
TR188199_c0_g1_i4	3B	475877013	475877785	0.0328879	gi|669029614|emb|CDM83878.1|	1.1e-55	unnamed protein product [Triticum aestivum]
TR188219_c0_g1_i7	3B	167967119	167968632	0.0434385	gi|475602698|gb|EMT25207.1|	0	GDSL esterase/lipase [Aegilops tauschii]
TR189613_c1_g1_i1	3B	184341694	184342696	0.0172888	gi|326507612|dbj|BAK03199.1|	2.91e-129	predicted protein [Hordeum vulgare subsp. vulgare]
TR189924_c0_g2_i1	3B	580835250	580840046	0.000416283	gi|669030288|emb|CDM84770.1|	6.46e-156	unnamed protein product [Triticum aestivum]
TR189924_c0_g2_i2	3B	580835250	580840046	0.00515366	gi|475568103|gb|EMT15410.1|	6.32e-75	Putative WRKY transcription factor 53 [Aegilops tauschii]
TR192255_c4_g2_i2	3B	89304138	89304922	0.0250156	gi|669027934|emb|CDM81562.1|	5.42e-34	unnamed protein product [Triticum aestivum]
TR192443_c0_g1_i1	3B	120524258	120528780	0.0418085	gi|669028110|emb|CDM81789.1|	0	unnamed protein product [Triticum aestivum]
TR193861_c0_g1_i5	3B	594100662	594100805	0.00121569	gi|669030359|emb|CDM84861.1|	3.31e-23	unnamed protein product [Triticum aestivum]
TR195460_c0_g1_i1	3B	444566686	444569502	0.0212311	gi|474254198|gb|EMS60336.1|	0	1,4-Dihydroxy-2-naphthoyl-CoA synthase, peroxisomal [Triticum urartu]
TR195875_c1_g4_i1	3B	955831	957996	0.0464639	gi|475626353|gb|EMT33311.1|	5.91e-93	hypothetical protein F775_19748 [Aegilops tauschii]
TR196227_c0_g1_i3	3B	629542747	629543175	0.00487998	gi|474187774|gb|EMS57979.1|	1.71e-88	hypothetical protein TRIUR3_15887 [Triticum urartu]
TR196227_c0_g1_i5	3B	629542747	629543175	0.00121658	gi|474187774|gb|EMS57979.1|	2.26e-88	hypothetical protein TRIUR3_15887 [Triticum urartu]
TR196424_c0_g1_i2	3B	308374868	308376038	0.0151787	gi|669028978|emb|CDM82984.1|	1.23e-30	unnamed protein product [Triticum aestivum]
TR196424_c0_g1_i3	3B	308374868	308376038	0.00440089	gi|669028978|emb|CDM82984.1|	1.43e-40	unnamed protein product [Triticum aestivum]
TR196510_c2_g1_i4	3B	236063917	236067128	0.0388648	gi|475536612|gb|EMT08945.1|	0	Dof zinc finger protein [Aegilops tauschii]
TR197022_c0_g2_i1	3B	377647164	377649444	0.0412833	gi|326526457|dbj|BAJ97245.1|	0	predicted protein [Hordeum vulgare subsp. vulgare]
TR197198_c1_g2_i1	3B	40269243	40275282	0.0183404	gi|669027489|emb|CDM80881.1|	1.09e-70	unnamed protein product [Triticum aestivum]
TR200634_c0_g1_i4	3B	430443769	430444017	0.00315468	gi|475626743|gb|EMT33458.1|	1e-39	hypothetical protein F775_07789 [Aegilops tauschii]
TR202037_c0_g1_i1	3B	414167525	414171407	0.0046276	gi|669029286|emb|CDM83445.1|	0	unnamed protein product [Triticum aestivum]
TR202243_c1_g1_i2	3B	573077558	573081024	0.0158278	gi|669030230|emb|CDM84690.1|	0	unnamed protein product [Triticum aestivum]
TR202341_c1_g5_i1	3B	587344733	587346685	0.0324681	gi|326519096|dbj|BAJ96547.1|	1.09e-21	predicted protein [Hordeum vulgare subsp. vulgare]
TR202346_c0_g1_i2	3B	444553027	444553557	0.048814	gi|475532245|gb|EMT08204.1|	2.27e-60	50S ribosomal protein L12-2, chloroplastic [Aegilops tauschii]
TR202590_c2_g1_i8	3B	24942563	24944372	0.0148958	gi|669027287|emb|CDM80597.1|	0	unnamed protein product [Triticum aestivum]
TR202849_c3_g1_i1	3B	750744238	750744651	0.0170287	gi|669031643|emb|CDM86741.1|	1.39e-60	unnamed protein product [Triticum aestivum]
TR204414_c0_g1_i2	3B	647352917	647356580	0.0146848	gi|669030709|emb|CDM85332.1|	0	unnamed protein product [Triticum aestivum]
TR205583_c3_g2_i1	3B	728138363	728138578	0.0467317	gi|669031375|emb|CDM86324.1|	1.01e-26	unnamed protein product [Triticum aestivum]
TR205583_c3_g2_i8	3B	727325026	727325181	0.0365072	gi|669031366|emb|CDM86306.1|	8.83e-24	unnamed protein product [Triticum aestivum]
TR206929_c1_g2_i1	3B	198820815	198823423	0.0457065	gi|669028595|emb|CDM82460.1|	0	unnamed protein product [Triticum aestivum]
TR206989_c2_g1_i1	3B	103414533	103415072	0.032244	gi|669028007|emb|CDM81658.1|	1.02e-66	unnamed protein product [Triticum aestivum]
TR207059_c0_g1_i4	3B	366413211	366414407	0.0379266	gi|475365263|gb|EMT00513.1|	3.18e-158	Myb-like protein J [Aegilops tauschii]
TR207208_c1_g1_i1	3B	14090778	14093501	0.00707144	gi|474431528|gb|EMS67977.1|	5.1e-69	Transcription factor bHLH35 [Triticum urartu]
TR207692_c2_g4_i1	3B	552023922	552025118	0.00360727	gi|669030094|emb|CDM84504.1|	1.92e-31	unnamed protein product [Triticum aestivum]
TR207701_c0_g1_i4	3B	14085964	14089036	0.0473581	gi|669027131|emb|CDM80371.1|	0	unnamed protein product [Triticum aestivum]
TR207782_c2_g1_i3	3B	627072592	627073434	0.0341781	gi|475562236|gb|EMT13974.1|	6.17e-31	Myb-like protein J [Aegilops tauschii]
TR208391_c0_g1_i1	3B	180659605	180659898	0.0212329	gi|357129011|ref|XP_003566162.1|	7.24e-19	PREDICTED: uncharacterized protein LOC100826645 [Brachypodium distachyon]
TR210662_c1_g1_i1	3B	15716020	15718403	0.0186143	gi|669027162|emb|CDM80416.1|	1.74e-41	unnamed protein product [Triticum aestivum]
TR211156_c0_g2_i2	3B	626348841	626349284	0.00361018	gi|474005663|gb|EMS52435.1|	1.24e-49	hypothetical protein TRIUR3_27866 [Triticum urartu]
TR211277_c1_g1_i1	3B	9665023	9667709	0.0258459	gi|300681582|emb|CBI75527.1|	0	Tetratricopeptide repeat domain containing protein, expressed [Triticum aestivum]
TR211324_c2_g1_i1	3B	382595456	382600582	0.0371248	gi|669029150|emb|CDM83259.1|	0	unnamed protein product [Triticum aestivum]
TR211580_c1_g1_i3	3B	651229472	651231598	0.0102417	gi|669030744|emb|CDM85385.1|	1.61e-71	unnamed protein product [Triticum aestivum]
TR211590_c0_g1_i4	3B	530083125	530084414	0.018596	gi|669029928|emb|CDM84286.1|	3.43e-87	unnamed protein product [Triticum aestivum]
TR212166_c5_g1_i2	3B	452802187	452803479	0.000667519	gi|326493950|dbj|BAJ85437.1|	4.64e-138	predicted protein, partial [Hordeum vulgare subsp. vulgare]
TR212166_c5_g1_i4	3B	452828028	452829181	0.0106334	gi|475565604|gb|EMT14834.1|	0	hypothetical protein F775_52549 [Aegilops tauschii]
TR212842_c0_g1_i4	3B	166669849	166670514	0.0103698	gi|669028398|emb|CDM82181.1|	1.99e-70	unnamed protein product [Triticum aestivum]
TR213366_c0_g1_i9	3B	108690438	108705064	0.0462993	gi|326506004|dbj|BAJ91241.1|	0	predicted protein [Hordeum vulgare subsp. vulgare]
TR214250_c0_g1_i3	3B	556234981	556236609	0.0472904	gi|669030122|emb|CDM84541.1|	0	unnamed protein product [Triticum aestivum]
TR214470_c0_g1_i4	3B	659435105	659437362	0.0127005	gi|669030811|emb|CDM85489.1|	3.83e-112	unnamed protein product [Triticum aestivum]
TR214525_c0_g1_i5	3B	5643815	5644382	0.0130383	gi|669027002|emb|CDM80157.1|	6.21e-15	unnamed protein product [Triticum aestivum]
TR215211_c0_g1_i2	3B	454849774	454854190	0.0283233	gi|669029502|emb|CDM83724.1|	9.2e-124	unnamed protein product [Triticum aestivum]
TR215211_c0_g2_i4	3B	454849774	454854190	0.0155386	gi|669029502|emb|CDM83724.1|	6.5e-122	unnamed protein product [Triticum aestivum]
TR215678_c5_g1_i1	3B	709128500	709129701	0.0448733	gi|475599548|gb|EMT24263.1|	0	Protein SRG1 [Aegilops tauschii]
TR216110_c0_g1_i2	3B	553965685	553968411	0.00763465	gi|474174082|gb|EMS57696.1|	0	Disease resistance protein RPS2 [Triticum urartu]
TR216250_c1_g3_i4	3B	618844273	618845806	0.0275993	gi|300681501|emb|CBH32596.1|	1.5e-26	conserved hypothetical protein, expressed [Triticum aestivum]
TR216277_c1_g1_i5	3B	99607627	99613047	0.0163376	gi|669027985|emb|CDM81630.1|	0	unnamed protein product [Triticum aestivum]
TR216313_c0_g1_i1	3B	144130175	144131170	0.0373061	gi|326492574|dbj|BAK02070.1|	6.25e-101	predicted protein [Hordeum vulgare subsp. vulgare]
TR216313_c2_g1_i6	3B	151273496	151274497	0.0186797	gi|669028252|emb|CDM81993.1|	0	unnamed protein product [Triticum aestivum]
TR216985_c0_g1_i1	3B	651737487	651737840	0.00493848	gi|669030750|emb|CDM85392.1|	9.95e-14	unnamed protein product [Triticum aestivum]
TR219560_c0_g1_i1	3B	185206152	185206538	0.0147001	gi|669028544|emb|CDM82393.1|	8.41e-52	unnamed protein product [Triticum aestivum]
TR221148_c1_g1_i3	3B	487560974	487569074	0.0269225	gi|300681463|emb|CBH32557.1|	6.78e-63	cyclase/dehydrase, putative, expressed [Triticum aestivum]
TR221882_c0_g1_i1	3B	466765184	466771681	0.00461351	gi|669029576|emb|CDM83826.1|	0	unnamed protein product [Triticum aestivum]
TR223096_c0_g1_i1	3B	534914355	534917176	0.0464741	gi|669029975|emb|CDM84353.1|	0	unnamed protein product [Triticum aestivum]
TR223397_c1_g1_i1	3B	15716020	15718403	0.0319063	gi|475556212|gb|EMT12593.1|	9.66e-82	hypothetical protein F775_43630 [Aegilops tauschii]
TR224191_c2_g2_i1	3B	24942563	24944372	0.000903671	gi|669027287|emb|CDM80597.1|	1.49e-35	unnamed protein product [Triticum aestivum]
TR224456_c0_g6_i9	3B	16192204	16195157	0.0341573	gi|383100766|emb|CCG47997.1|	0	glycosyltransferase, HGA-like,putative,expressed [Triticum aestivum]
TR225406_c0_g1_i1	3B	580156045	580157397	0.00250683	gi|669030286|emb|CDM84763.1|	0	unnamed protein product [Triticum aestivum]
TR225420_c1_g1_i3	3B	402396820	402398982	0.0225222	gi|475519890|gb|EMT06412.1|	0	Secologanin synthase [Aegilops tauschii]
TR225887_c4_g1_i7	3B	232670745	232677564	0.00356125	gi|669028723|emb|CDM82636.1|	2.24e-44	unnamed protein product [Triticum aestivum]
TR226236_c1_g1_i1	3B	609517341	609518804	0.0430938	gi|669030451|emb|CDM84981.1|	0	unnamed protein product [Triticum aestivum]
TR226236_c1_g1_i3	3B	609517341	609518804	0.0314138	gi|669030451|emb|CDM84981.1|	0	unnamed protein product [Triticum aestivum]
TR226241_c1_g4_i6	3B	17692554	17699859	0.00364615	gi|669027198|emb|CDM80466.1|	4.57e-96	unnamed protein product [Triticum aestivum]
TR226593_c1_g2_i3	3B	125772745	125775053	0.0214834	gi|475561254|gb|EMT13739.1|	0	Putative serine incorporator [Aegilops tauschii]
TR226593_c1_g2_i4	3B	125772745	125775053	0.0355784	gi|669028142|emb|CDM81834.1|	0	unnamed protein product [Triticum aestivum]
TR226665_c1_g3_i6	3B	485806159	485812458	0.0289129	gi|300681506|emb|CBH32600.1|	2.51e-180	pepsin A, putative, expressed [Triticum aestivum]
TR229763_c0_g1_i2	3B	87699258	87701568	0.0470529	gi|357126570|ref|XP_003564960.1|	4.73e-139	PREDICTED: uncharacterized protein LOC100826428 isoform X2 [Brachypodium distachyon]
TR230130_c2_g1_i4	3B	34639740	34641480	0.0187106	gi|669027408|emb|CDM80758.1|	0	unnamed protein product [Triticum aestivum]
TR230865_c0_g1_i4	3B	146423519	146426767	0.0247479	gi|669028269|emb|CDM82015.1|	0	unnamed protein product [Triticum aestivum]
TR232576_c0_g1_i6	3B	527199726	527200176	0.0194511	gi|357131021|ref|XP_003567142.1|	1.15e-37	PREDICTED: mavicyanin-like [Brachypodium distachyon]
TR233345_c1_g2_i5	3B	390400473	390418679	0.0146409	gi|669029183|emb|CDM83303.1|	0	unnamed protein product [Triticum aestivum]
TR234925_c2_g3_i2	3B	627284101	627285247	0.0347395	gi|669030558|emb|CDM85123.1|	1.91e-135	unnamed protein product [Triticum aestivum]
TR234925_c2_g3_i4	3B	627284101	627285247	0.0130638	gi|475562237|gb|EMT13975.1|	6.94e-29	NAC domain-containing protein 90 [Aegilops tauschii]
TR235861_c0_g1_i5	3B	2734638	2736232	0.00933874	gi|669026959|emb|CDM80089.1|	1.97e-97	unnamed protein product [Triticum aestivum]
TR237586_c0_g1_i2	3B	494521070	494523965	0.0148032	gi|473926885|gb|EMS49856.1|	0	Glucan endo-1,3-beta-glucosidase 13 [Triticum urartu]
TR237916_c1_g1_i1	3B	969001	970652	0.000441261	gi|473763932|gb|EMS45882.1|	7.77e-29	hypothetical protein TRIUR3_14872 [Triticum urartu]
TR237916_c1_g4_i10	3B	969001	970652	0.0354454	gi|669026893|emb|CDM80000.1|	1.1e-93	unnamed protein product [Triticum aestivum]
TR237916_c1_g4_i5	3B	969001	970652	0.0210385	gi|669026893|emb|CDM80000.1|	2.44e-73	unnamed protein product [Triticum aestivum]
TR237944_c0_g1_i3	3B	511084255	511086874	0.0240434	gi|669029817|emb|CDM84145.1|	0	unnamed protein product [Triticum aestivum]
TR238511_c1_g1_i3	3B	411814948	411817558	0.0393654	gi|669029269|emb|CDM83423.1|	0	unnamed protein product [Triticum aestivum]
TR238515_c2_g3_i1	3B	416733576	416734759	0.00132474	gi|669029296|emb|CDM83459.1|	4.2e-47	unnamed protein product [Triticum aestivum]
TR238528_c1_g3_i2	3B	667458870	667460247	0.0374562	gi|669030895|emb|CDM85592.1|	2.37e-97	unnamed protein product [Triticum aestivum]
TR238528_c1_g3_i3	3B	667458870	667460247	0.00929935	gi|669030895|emb|CDM85592.1|	1.22e-102	unnamed protein product [Triticum aestivum]
TR238593_c1_g1_i1	3B	517070600	517074041	0.0404217	gi|669029864|emb|CDM84208.1|	0	unnamed protein product [Triticum aestivum]
TR238650_c3_g1_i2	3B	697349368	697350438	0.0487442	gi|326495534|dbj|BAJ85863.1|	1.03e-124	predicted protein [Hordeum vulgare subsp. vulgare]
TR238650_c3_g2_i1	3B	697349368	697350438	0.00935833	gi|326495534|dbj|BAJ85863.1|	0	predicted protein [Hordeum vulgare subsp. vulgare]
TR238650_c4_g1_i7	3B	697349368	697350438	0.0176225	gi|475507825|gb|EMT04998.1|	8.39e-100	Putative disease resistance RPP13-like protein 1 [Aegilops tauschii]
TR3062_c0_g1_i1	3B	463259138	463266932	0.00403238	gi|669029555|emb|CDM83797.1|	1.07e-25	unnamed protein product [Triticum aestivum]
TR77574_c1_g1_i1	3B	521124741	521127707	0.0294701	gi|835908915|ref|XP_012700451.1|	0	PREDICTED: uncharacterized protein LOC101774910 [Setaria italica]
TR79941_c1_g1_i1	3B	234446702	234446989	0.0486825	gi|1129142|emb|CAA55482.1|	6.33e-06	ORF1 [Hordeum vulgare subsp. vulgare]
TR79941_c1_g1_i2	3B	234446702	234446989	0.00698864	gi|1129142|emb|CAA55482.1|	7.25e-06	ORF1 [Hordeum vulgare subsp. vulgare]
TR82949_c0_g1_i2	3B	65103201	65112222	0.0320294	gi|474410366|gb|EMS66783.1|	5.06e-49	hypothetical protein TRIUR3_15770 [Triticum urartu]
TR85520_c0_g2_i1	3B	549317356	549321297	0.0256195	gi|474066737|gb|EMS54176.1|	1.51e-29	Purple acid phosphatase 2 [Triticum urartu]
TR87277_c0_g1_i1	3B	694451235	694452671	0.0306665	gi|669031089|emb|CDM85855.1|	1.68e-82	unnamed protein product [Triticum aestivum]
TR92252_c0_g1_i1	3B	652794392	652798150	0.0241088	gi|669030756|emb|CDM85401.1|	1.13e-72	unnamed protein product [Triticum aestivum]
TR96721_c0_g1_i1	3B	40255613	40257126	0.0069402	gi|669027482|emb|CDM80874.1|	1.08e-82	unnamed protein product [Triticum aestivum]
TCONS_00079733	3D	821975	822349	0.00309102	gi|357135051|ref|XP_003569125.1|	0	PREDICTED: probable receptor-like protein kinase At1g67000 [Brachypodium distachyon]
TCONS_00079909	3D	5808384	5808508	0.0344524	gi|475580453|gb|EMT18601.1|	0	Putative LRR receptor-like serine/threonine-protein kinase [Aegilops tauschii]
TCONS_00080114	3D	10529864	10529939	0.0303384	gi|473923341|gb|EMS49762.1|	3.56e-12	hypothetical protein TRIUR3_19434 [Triticum urartu]
TCONS_00080275	3D	18211174	18211272	0.0258287	gi|944068182|gb|KQK03666.1|	6.67e-96	hypothetical protein BRADI_2g09200 [Brachypodium distachyon]
TCONS_00080394	3D	22437419	22437503	0.0189087	gi|669029701|emb|CDM83988.1|	1.2e-166	unnamed protein product [Triticum aestivum]
TCONS_00080438	3D	25133129	25133248	0.0108593	gi|326519466|dbj|BAK00106.1|	5.61e-85	predicted protein [Hordeum vulgare subsp. vulgare]
TCONS_00080452	3D	26839877	26839990	0.0305575	gi|474343136|gb|EMS62721.1|	9.23e-80	O-acyltransferase WSD1 [Triticum urartu]
TCONS_00080756	3D	39514999	39516352	0.0425672	NA	NA	NA
TCONS_00080974	3D	51723655	51723715	0.0011216	gi|669028978|emb|CDM82984.1|	5.71e-43	unnamed protein product [Triticum aestivum]
TCONS_00081088	3D	57273631	57273923	0.0492365	gi|326496775|dbj|BAJ98414.1|	6.08e-44	predicted protein [Hordeum vulgare subsp. vulgare]
TCONS_00081163	3D	62063668	62064795	0.0357185	gi|474320635|gb|EMS62261.1|	2.36e-34	hypothetical protein TRIUR3_33055 [Triticum urartu]
TCONS_00081282	3D	68031960	68032030	0.0184754	gi|474097538|gb|EMS55159.1|	0	Vegetative incompatibility protein HET-E-1 [Triticum urartu]
TCONS_00081435	3D	81853962	81854371	0.0435492	gi|53792453|dbj|BAD53361.1|	0	putative receptor-like protein kinase ARK1 [Oryza sativa Japonica Group]
TCONS_00081572	3D	89689770	89689963	0.0169275	gi|475598420|gb|EMT23935.1|	7.52e-108	hypothetical protein F775_03303 [Aegilops tauschii]
TCONS_00081606	3D	90646615	90647698	0.0345844	gi|763752780|gb|KJB20168.1|	1.95e-81	hypothetical protein B456_003G136100 [Gossypium raimondii]
TCONS_00081705	3D	93352258	93352418	0.0156162	gi|357133377|ref|XP_003568301.1|	2.25e-62	PREDICTED: 60S ribosomal protein L36-3-like [Brachypodium distachyon]
TCONS_00081707	3D	93415096	93415179	0.0401895	gi|475589090|gb|EMT21067.1|	0	hypothetical protein F775_21366 [Aegilops tauschii]
TCONS_00081808	3D	97315615	97316261	0.00151031	gi|669030676|emb|CDM85284.1|	1e-55	unnamed protein product [Triticum aestivum]
TCONS_00081825	3D	97624397	97625358	0.0495611	gi|475480711|gb|EMT02847.1|	1.66e-162	hypothetical protein F775_12138 [Aegilops tauschii]
TCONS_00082116	3D	106357582	106357918	1.03e-59	gi|357126646|ref|XP_003564998.1|	3.74e-155	PREDICTED: beta-glucosidase 5-like isoform X2 [Brachypodium distachyon]
TCONS_00082130	3D	106523471	106523623	0.025651	gi|475527896|gb|EMT07549.1|	0	Disease resistance protein RPM1 [Aegilops tauschii]
TCONS_00082295	3D	115562018	115562063	0.0145394	gi|475576797|gb|EMT17641.1|	1.6e-105	hypothetical protein F775_16441 [Aegilops tauschii]
TCONS_00082322	3D	116586506	116587133	0.0462993	gi|475592570|gb|EMT22120.1|	3.77e-57	6-phosphogluconate dehydrogenase, decarboxylating [Aegilops tauschii]
TCONS_00082531	3D	100537	101119	0.0490813	gi|473901567|gb|EMS49190.1|	1.22e-128	Dephospho-CoA kinase domain-containing protein [Triticum urartu]
TCONS_00082564	3D	1058404	1059796	0.0389283	gi|669031531|emb|CDM86560.1|	0	unnamed protein product [Triticum aestivum]
TCONS_00082645	3D	3859395	3859680	0.00261089	gi|475604371|gb|EMT25715.1|	0	Putative receptor-like protein kinase [Aegilops tauschii]
TCONS_00082734	3D	6189209	6190551	0.0361479	gi|721625984|ref|XP_010229240.1|	0	PREDICTED: G-type lectin S-receptor-like serine/threonine-protein kinase At2g19130 [Brachypodium distachyon]
TCONS_00082934	3D	14489312	14489791	0.0271804	gi|475614024|gb|EMT28955.1|	1.57e-50	ATP-dependent Clp protease proteolytic subunit-related protein 4, chloroplastic [Aegilops tauschii]
TCONS_00083047	3D	20175569	20175862	0.0427575	gi|475622276|gb|EMT31822.1|	3.83e-78	DEAD-box ATP-dependent RNA helicase 39 [Aegilops tauschii]
TCONS_00083078	3D	22567106	22569318	0.00135374	gi|475615412|gb|EMT29435.1|	6.86e-128	Putative mitochondrial chaperone bcs1 [Aegilops tauschii]
TCONS_00083388	3D	33549844	33549919	0.010392	gi|475565772|gb|EMT14864.1|	7.64e-47	Protein RUPTURED POLLEN GRAIN 1 [Aegilops tauschii]
TCONS_00083569	3D	42252417	42253629	0.00240736	gi|473951385|gb|EMS50738.1|	0	TPR repeat-containing thioredoxin TTL1 [Triticum urartu]
TCONS_00083621	3D	43471400	43471951	0.0413229	gi|475519619|gb|EMT06382.1|	0	hypothetical protein F775_02163 [Aegilops tauschii]
TCONS_00083685	3D	45845848	45846270	0.0411198	gi|669029742|emb|CDM84044.1|	1.37e-85	unnamed protein product [Triticum aestivum]
TCONS_00083993	3D	59402745	59403927	0.0340359	gi|669030080|emb|CDM84487.1|	0	unnamed protein product [Triticum aestivum]
TCONS_00084039	3D	62485267	62485839	0.0262644	gi|326526327|dbj|BAJ97180.1|	6.26e-77	predicted protein [Hordeum vulgare subsp. vulgare]
TCONS_00084079	3D	65279526	65279837	0.00373773	gi|475580366|gb|EMT18574.1|	1.6e-68	Threonine synthase 2, chloroplastic [Aegilops tauschii]
TCONS_00084114	3D	66143514	66144263	0.0402565	gi|475626644|gb|EMT33423.1|	3.79e-123	hypothetical protein F775_02716 [Aegilops tauschii]
TCONS_00084115	3D	66143690	66144646	0.0177732	NA	NA	NA
TCONS_00084280	3D	72697186	72697615	0.0334475	gi|299109315|emb|CBH32505.1|	1.19e-97	ras-related protein, expressed [Triticum aestivum]
TCONS_00084333	3D	74530432	74530803	0.0337453	gi|475532247|gb|EMT08206.1|	3.74e-177	Naphthoate synthase [Aegilops tauschii]
TCONS_00084379	3D	77579570	77579701	0.0486749	gi|669029300|emb|CDM83465.1|	0	unnamed protein product [Triticum aestivum]
TCONS_00084382	3D	77697964	77698679	0.0274312	gi|475608608|gb|EMT27088.1|	1.09e-125	hypothetical protein F775_31940 [Aegilops tauschii]
TCONS_00084542	3D	88611765	88612007	0.0117242	gi|474392083|gb|EMS65442.1|	4.73e-140	60S ribosomal protein L10a-1 [Triticum urartu]
TCONS_00084631	3D	90560101	90560513	0.0107202	gi|669030423|emb|CDM84945.1|	1.77e-65	unnamed protein product [Triticum aestivum]
TCONS_00084763	3D	97317107	97317432	0.028636	gi|296044570|gb|ADG85705.1|	5.63e-46	putative calreticulin [Triticum aestivum]
TCONS_00084807	3D	98242227	98242716	0.0162141	gi|669030735|emb|CDM85371.1|	6.04e-111	unnamed protein product [Triticum aestivum]
TCONS_00084843	3D	99342699	99343364	0.00722525	gi|338808457|gb|AEJ07957.1|	1.72e-16	polyprotein [Sorghum propinquum]
TCONS_00084890	3D	101104699	101105052	0.0430244	gi|475604540|gb|EMT25763.1|	0	hypothetical protein F775_31864 [Aegilops tauschii]
TCONS_00084905	3D	101452894	101453270	0.0102487	gi|326507100|dbj|BAJ95627.1|	0	predicted protein [Hordeum vulgare subsp. vulgare]
TCONS_00084945	3D	101818905	101819542	0.0142609	NA	NA	NA
TCONS_00085023	3D	104155957	104156157	0.0194776	gi|357126532|ref|XP_003564941.1|	5.71e-07	PREDICTED: acyl-[acyl-carrier-protein] desaturase 2, chloroplastic [Brachypodium distachyon]
TCONS_00085074	3D	106408468	106408655	0.00736182	gi|475596373|gb|EMT23338.1|	0	Serine palmitoyltransferase 2 [Aegilops tauschii]
TCONS_00085147	3D	109288223	109288581	0.0126695	gi|475537242|gb|EMT09043.1|	0	Putative LRR receptor-like serine/threonine-protein kinase [Aegilops tauschii]
TCONS_00085255	3D	113056100	113057001	0.00598104	gi|474323510|gb|EMS62361.1|	0	Serine/threonine-protein kinase PBS1 [Triticum urartu]
TCONS_00085376	3D	117737611	117738041	0.013555	gi|475601347|gb|EMT24799.1|	3.54e-13	Putative calcium-binding protein CML31 [Aegilops tauschii]
TCONS_00085413	3D	118585187	118586385	0.0134105	gi|475578406|gb|EMT18086.1|	7.5e-27	hypothetical protein F775_32176 [Aegilops tauschii]
TCONS_00085601	3D	124012659	124013137	0.00378989	gi|474073275|gb|EMS54452.1|	3.89e-148	Vacuolar-processing enzyme [Triticum urartu]
TCONS_00085607	3D	124314654	124315269	0.00152936	gi|475554477|gb|EMT12236.1|	0	Secologanin synthase [Aegilops tauschii]
TCONS_00085612	3D	380680	381295	8.78e-05	NA	NA	NA
TCONS_00085824	3D	35075521	35076265	0.0370053	NA	NA	NA
TCONS_00085829	3D	36510103	36511726	0.0286334	NA	NA	NA
TCONS_00085903	3D	59432397	59433195	0.00480927	NA	NA	NA
TCONS_00086001	3D	85671274	85671658	0.023429	NA	NA	NA
TCONS_00086010	3D	87263560	87263972	0.018661	gi|669030259|emb|CDM84727.1|	7.76e-10	unnamed protein product [Triticum aestivum]
TCONS_00086144	3D	108529762	108530574	0.0486242	NA	NA	NA
TCONS_00086208	3D	116592182	116592532	0.012489	NA	NA	NA
TCONS_00086246	3D	121906788	121907746	0.011644	gi|475545831|gb|EMT10549.1|	1.65e-79	hypothetical protein F775_07892 [Aegilops tauschii]
TR104805_c0_g1_i1	3D	118587794	118588757	0.0402676	gi|669031640|emb|CDM86738.1|	1.13e-25	unnamed protein product [Triticum aestivum]
TR149189_c0_g1_i5	3D	90428706	90429460	0.0207366	gi|473728498|gb|EMS45106.1|	8e-129	hypothetical protein TRIUR3_04898 [Triticum urartu]
TR149265_c0_g5_i1	3D	62485333	62490684	0.041925	gi|475604988|gb|EMT25909.1|	1.91e-91	hypothetical protein F775_07455 [Aegilops tauschii]
TR156640_c2_g1_i3	3D	122454302	122457470	0.00997098	gi|474402869|gb|EMS66187.1|	0	Wall-associated receptor kinase 5 [Triticum urartu]
TR171515_c1_g1_i2	3D	35160073	35163729	0.000356406	gi|669029740|emb|CDM84042.1|	0	unnamed protein product [Triticum aestivum]
TR181568_c2_g1_i1	3D	113648668	113649336	0.0272143	gi|669031304|emb|CDM86190.1|	1.1e-12	unnamed protein product [Triticum aestivum]
TR181568_c2_g1_i3	3D	113648668	113649336	0.00611607	gi|669031304|emb|CDM86190.1|	4.47e-11	unnamed protein product [Triticum aestivum]
TR181852_c1_g3_i7	3D	59402745	59409309	0.0374013	gi|669030080|emb|CDM84487.1|	0	unnamed protein product [Triticum aestivum]
TR192301_c0_g1_i6	3D	104848230	104856420	0.04936	gi|475455259|gb|EMT01819.1|	7.79e-138	Mannosyl-oligosaccharide glucosidase [Aegilops tauschii]
TR226634_c0_g2_i2	3D	106155035	106157719	0.0426705	gi|326491675|dbj|BAJ94315.1|	0	predicted protein [Hordeum vulgare subsp. vulgare]
TR233739_c0_g1_i1	3D	54318948	54322393	0.0299215	gi|326510131|dbj|BAJ87282.1|	0	predicted protein [Hordeum vulgare subsp. vulgare]
TCONS_00086390	4A	8819947	8821384	0.0129021	gi|326493386|dbj|BAJ85154.1|	0	predicted protein [Hordeum vulgare subsp. vulgare]
TCONS_00086436	4A	11535589	11536335	0.0348177	gi|474396604|gb|EMS65761.1|	0	ABC transporter G family member 22 [Triticum urartu]
TCONS_00086808	4A	35260652	35260936	0.018549	gi|189172063|gb|ACD80387.1|	1.23e-132	WRKY40 transcription factor, partial [Triticum aestivum]
TCONS_00086822	4A	38768970	38769677	0.0477468	gi|326492672|dbj|BAJ90192.1|	0	predicted protein, partial [Hordeum vulgare subsp. vulgare]
TCONS_00086834	4A	40674012	40674203	0.00705217	gi|326522678|dbj|BAJ88385.1|	1.7e-153	predicted protein [Hordeum vulgare subsp. vulgare]
TCONS_00086856	4A	44313201	44315544	0.0426145	gi|326491117|dbj|BAK05658.1|	0	predicted protein [Hordeum vulgare subsp. vulgare]
TCONS_00087063	4A	56439629	56441292	0.0209585	gi|474434231|gb|EMS68137.1|	4.34e-12	hypothetical protein TRIUR3_12323 [Triticum urartu]
TCONS_00087067	4A	56952859	56954014	0.0324973	gi|475606980|gb|EMT26550.1|	1.11e-100	50S ribosomal protein L10, chloroplastic [Aegilops tauschii]
TCONS_00087071	4A	57399554	57399598	0.0307375	gi|414866282|tpg|DAA44839.1|	8.43e-133	TPA: hypothetical protein ZEAMMB73_049352 [Zea mays]
TCONS_00087135	4A	61732875	61733558	0.00650554	gi|357113138|ref|XP_003558361.1|	0	PREDICTED: uncharacterized protein LOC100843093 [Brachypodium distachyon]
TCONS_00087168	4A	63724968	63725536	0.00337442	gi|475531440|gb|EMT08077.1|	0	RNA polymerase sigma factor rpoD [Aegilops tauschii]
TCONS_00087204	4A	66145862	66146034	0.0278544	gi|326522564|dbj|BAK07744.1|	0	predicted protein [Hordeum vulgare subsp. vulgare]
TCONS_00087238	4A	68206151	68206578	0.0122691	gi|326517635|dbj|BAK03736.1|	0	predicted protein, partial [Hordeum vulgare subsp. vulgare]
TCONS_00087401	4A	81039076	81039320	0.0403773	gi|474381082|gb|EMS64563.1|	0	Uroporphyrinogen decarboxylase 2, chloroplastic [Triticum urartu]
TCONS_00087437	4A	86640945	86641826	0.04074	gi|326518937|dbj|BAJ92629.1|	1.05e-119	predicted protein [Hordeum vulgare subsp. vulgare]
TCONS_00087722	4A	120699431	120700322	0.0198746	gi|326496815|dbj|BAJ98434.1|	1.32e-76	predicted protein [Hordeum vulgare subsp. vulgare]
TCONS_00087783	4A	127878007	127878297	0.0201029	gi|474174830|gb|EMS57730.1|	0	Peroxidase 4 [Triticum urartu]
TCONS_00087853	4A	134090126	134092485	0.0318276	gi|326498187|dbj|BAJ94956.1|	0	predicted protein [Hordeum vulgare subsp. vulgare]
TCONS_00087926	4A	137923071	137923413	0.00988798	gi|326529431|dbj|BAK04662.1|	1.1e-08	predicted protein [Hordeum vulgare subsp. vulgare]
TCONS_00087976	4A	140341339	140341545	0.0320242	gi|461682203|gb|AGH18692.1|	0	shikimate kinase-like protein [Triticum aestivum]
TCONS_00088062	4A	141666155	141666501	0.0161755	gi|310656801|gb|ADP02228.1|	1.6e-97	putative microsomal glutathione S-transferase 3 [Aegilops tauschii]
TCONS_00088531	4A	166064822	166065188	0.0256732	gi|473941411|gb|EMS50342.1|	2.94e-159	hypothetical protein TRIUR3_16524 [Triticum urartu]
TCONS_00088630	4A	170623757	170624743	0.0328277	gi|475552750|gb|EMT11857.1|	0	Wall-associated receptor kinase 3 [Aegilops tauschii]
TCONS_00088632	4A	170627590	170628663	0.0065848	gi|475552750|gb|EMT11857.1|	0	Wall-associated receptor kinase 3 [Aegilops tauschii]
TCONS_00088653	4A	171359913	171359985	0.0256677	gi|326533834|dbj|BAJ93690.1|	0	predicted protein [Hordeum vulgare subsp. vulgare]
TCONS_00088665	4A	171691299	171693279	0.0157957	gi|475552752|gb|EMT11859.1|	1.16e-130	1-aminocyclopropane-1-carboxylate oxidase-1-like protein [Aegilops tauschii]
TCONS_00088702	4A	173033160	173034595	0.000384926	NA	NA	NA
TCONS_00088870	4A	181095382	181095663	0.0179086	gi|357110849|ref|XP_003557228.1|	1.99e-88	PREDICTED: probable ribosome-binding factor A, chloroplastic [Brachypodium distachyon]
TCONS_00088995	4A	186937916	186938443	0.00344668	gi|326526997|dbj|BAK00887.1|	3.71e-173	predicted protein [Hordeum vulgare subsp. vulgare]
TCONS_00089011	4A	188100418	188101407	0.0469755	gi|475352176|gb|EMT00425.1|	0	hypothetical protein F775_30115 [Aegilops tauschii]
TCONS_00089019	4A	188825238	188825614	0.0293624	gi|326493106|dbj|BAJ85014.1|	2.07e-100	predicted protein [Hordeum vulgare subsp. vulgare]
TCONS_00089204	4A	198087336	198087864	0.0401892	gi|473953833|gb|EMS50826.1|	1.31e-50	hypothetical protein TRIUR3_04647 [Triticum urartu]
TCONS_00089205	4A	198099712	198099911	0.0463286	gi|473953835|gb|EMS50828.1|	4.43e-63	hypothetical protein TRIUR3_04649 [Triticum urartu]
TCONS_00089416	4A	206779739	206781295	0.0295661	gi|475583421|gb|EMT19452.1|	4.37e-152	hypothetical protein F775_30045 [Aegilops tauschii]
TCONS_00089461	4A	209013469	209013563	0.0255075	gi|474438538|gb|EMS68298.1|	0	RuBisCO large subunit-binding protein subunit beta, chloroplastic [Triticum urartu]
TCONS_00089728	4A	6522902	6523282	0.032725	gi|944047115|gb|KQJ82756.1|	9.52e-177	hypothetical protein BRADI_5g10831 [Brachypodium distachyon]
TCONS_00089802	4A	13346424	13346877	0.016804	gi|326503656|dbj|BAJ86334.1|	9.1e-141	predicted protein [Hordeum vulgare subsp. vulgare]
TCONS_00089972	4A	25007311	25008523	0.031958	gi|326512038|dbj|BAJ96000.1|	0	predicted protein [Hordeum vulgare subsp. vulgare]
TCONS_00090045	4A	29491441	29491712	0.0237543	gi|326489899|dbj|BAJ94023.1|	1.35e-138	predicted protein [Hordeum vulgare subsp. vulgare]
TCONS_00090445	4A	52113877	52114405	0.0379611	gi|472232592|emb|CCV01571.1|	0	GT43_2A [Triticum aestivum]
TCONS_00090470	4A	53826044	53826507	0.000955774	gi|475613078|gb|EMT28639.1|	0	Phosphoinositide phospholipase C 4 [Aegilops tauschii]
TCONS_00090546	4A	57949567	57950133	0.0423413	gi|475503875|gb|EMT04578.1|	1.94e-172	hypothetical protein F775_00061 [Aegilops tauschii]
TCONS_00090580	4A	60024669	60025131	0.0305696	gi|357112894|ref|XP_003558240.1|	0	PREDICTED: laccase-10-like [Brachypodium distachyon]
TCONS_00090625	4A	62793876	62794637	0.00897559	gi|399207756|gb|AFP33387.1|	0	Mn-specific cation diffusion facilitator transporter MTP8.1 [Hordeum vulgare]
TCONS_00090636	4A	64302953	64303384	0.0401682	gi|475600043|gb|EMT24413.1|	4.21e-69	Putative dihydrodipicolinate reductase 2, chloroplastic [Aegilops tauschii]
TCONS_00090640	4A	64624621	64624855	0.00472559	gi|326504318|dbj|BAJ90991.1|	2e-10	predicted protein [Hordeum vulgare subsp. vulgare]
TCONS_00090992	4A	86643103	86643909	0.00123024	gi|357112445|ref|XP_003558019.1|	3.96e-166	PREDICTED: uncharacterized protein LOC100841464 [Brachypodium distachyon]
TCONS_00091037	4A	93984797	93985877	0.0040171	gi|944086688|gb|KQK22040.1|	1.93e-58	hypothetical protein BRADI_1g64710 [Brachypodium distachyon]
TCONS_00091075	4A	99998171	99999666	0.0101575	gi|475503963|gb|EMT04588.1|	0	hypothetical protein F775_07571 [Aegilops tauschii]
TCONS_00091084	4A	101376870	101377731	0.0198867	gi|326495462|dbj|BAJ85827.1|	0	predicted protein [Hordeum vulgare subsp. vulgare]
TCONS_00091101	4A	103583006	103583206	0.00155649	NA	NA	NA
TCONS_00091171	4A	111319562	111320452	0.00449997	gi|326508590|dbj|BAJ95817.1|	2.13e-31	predicted protein [Hordeum vulgare subsp. vulgare]
TCONS_00091280	4A	117418896	117419378	0.0128193	gi|474139643|gb|EMS56488.1|	2.99e-173	Protein tas [Triticum urartu]
TCONS_00091786	4A	149894524	149894802	0.0150125	gi|301130798|gb|ADK62373.1|	0	lectin receptor kinase [Triticum aestivum]
TCONS_00092014	4A	159852707	159853188	0.00910094	gi|474319812|gb|EMS62217.1|	1.1e-38	hypothetical protein TRIUR3_26045 [Triticum urartu]
TCONS_00092136	4A	167544795	167545137	0.00090334	gi|473731943|gb|EMS45177.1|	0	Protein tas [Triticum urartu]
TCONS_00092370	4A	175285138	175285659	0.0097755	gi|474446172|gb|EMS68630.1|	6.24e-53	Phytosulfokine receptor 2 [Triticum urartu]
TCONS_00092447	4A	177251853	177252467	0.0169768	gi|326505708|dbj|BAJ95525.1|	5.11e-56	predicted protein [Hordeum vulgare subsp. vulgare]
TCONS_00092529	4A	182761884	182764076	0.023323	gi|301130795|gb|ADK62370.1|	0	hexose carrier, partial [Triticum aestivum]
TCONS_00092608	4A	187149221	187149550	0.00300337	gi|326497135|dbj|BAK02152.1|	1.73e-171	predicted protein [Hordeum vulgare subsp. vulgare]
TCONS_00092735	4A	193201097	193201571	0.00349954	gi|669028118|emb|CDM81802.1|	2.08e-38	unnamed protein product [Triticum aestivum]
TCONS_00092908	4A	203280608	203281430	0.049542	gi|326494234|dbj|BAJ90386.1|	1.31e-152	predicted protein [Hordeum vulgare subsp. vulgare]
TCONS_00092915	4A	203749757	203751107	0.0109742	gi|326510309|dbj|BAJ87371.1|	3.01e-167	predicted protein [Hordeum vulgare subsp. vulgare]
TCONS_00092916	4A	203802230	203803417	0.0402646	gi|402484931|gb|AFQ60149.1|	2.6e-124	SNAP34 [Triticum aestivum]
TCONS_00092936	4A	205542171	205542399	0.0091455	gi|475598930|gb|EMT24095.1|	1.31e-46	Acyl-CoA-binding protein [Aegilops tauschii]
TCONS_00093036	4A	210996411	210997511	0.00281514	gi|18146821|dbj|BAB82469.1|	0	sucrose:fructan 6-fructosyltransferase [Triticum aestivum]
TCONS_00093105	4A	213617528	213618609	0.0288403	gi|475598107|gb|EMT23831.1|	5.41e-153	hypothetical protein F775_52102 [Aegilops tauschii]
TCONS_00093294	4A	58227180	58227901	0.00552469	NA	NA	NA
TCONS_00093313	4A	69979879	69980430	0.00146694	gi|473904105|gb|EMS49259.1|	2.97e-33	Peroxidasin-like protein [Triticum urartu]
TCONS_00093324	4A	76811695	76813493	0.0162704	gi|440577308|emb|CCI55315.1|	3.43e-91	PH01B001I13.11 [Phyllostachys edulis]
TCONS_00093335	4A	86951378	86952725	0.00498156	NA	NA	NA
TCONS_00093425	4A	138244070	138245594	0.0369452	NA	NA	NA
TCONS_00093511	4A	170410952	170411824	0.0380432	NA	NA	NA
TCONS_00093554	4A	177372107	177373178	0.0214288	NA	NA	NA
TCONS_00093624	4A	203618150	203620320	0.00655434	NA	NA	NA
TR109934_c0_g1_i1	4A	1723991	1725434	0.0427082	gi|326496280|dbj|BAJ94602.1|	2.53e-111	predicted protein, partial [Hordeum vulgare subsp. vulgare]
TR119504_c0_g1_i1	4A	21140191	21143193	0.0373424	gi|474122277|gb|EMS56094.1|	2.32e-107	hypothetical protein TRIUR3_23413 [Triticum urartu]
TR124775_c0_g3_i1	4A	3292397	3294599	0.0140282	gi|326506672|dbj|BAJ91377.1|	1.4e-92	predicted protein [Hordeum vulgare subsp. vulgare]
TR149074_c0_g2_i3	4A	36391412	36392692	0.0199534	gi|357119894|ref|XP_003561668.1|	3.46e-148	PREDICTED: 60S ribosomal protein L10-like [Brachypodium distachyon]
TR149985_c2_g2_i2	4A	65701686	65703664	0.0272762	gi|326533016|dbj|BAJ89353.1|	0	predicted protein [Hordeum vulgare subsp. vulgare]
TR150348_c0_g1_i3	4A	120699431	120701419	0.00212635	gi|326496815|dbj|BAJ98434.1|	5.7e-74	predicted protein [Hordeum vulgare subsp. vulgare]
TR152184_c0_g2_i1	4A	213891833	213896680	0.00017134	gi|475616380|gb|EMT29742.1|	0	Disease resistance protein RGA2 [Aegilops tauschii]
TR154733_c1_g1_i1	4A	86643103	86649145	0.00688836	gi|357112445|ref|XP_003558019.1|	2.92e-149	PREDICTED: uncharacterized protein LOC100841464 [Brachypodium distachyon]
TR159101_c0_g1_i1	4A	1322334	1324030	1.03e-59	gi|475570136|gb|EMT15944.1|	0	hypothetical protein F775_17477 [Aegilops tauschii]
TR164045_c1_g1_i1	4A	199510749	199512163	0.027231	gi|326516708|dbj|BAJ96346.1|	3.09e-131	predicted protein [Hordeum vulgare subsp. vulgare]
TR164172_c4_g1_i11	4A	149894524	149897137	0.0180087	gi|301130798|gb|ADK62373.1|	0	lectin receptor kinase [Triticum aestivum]
TR165294_c3_g5_i1	4A	182761884	182764076	0.0370201	gi|219814409|gb|ACL36483.1|	3.27e-103	hexose carrier [Aegilops tauschii]
TR166615_c0_g1_i4	4A	57358789	57360397	0.0222272	gi|475371611|gb|EMT00565.1|	6.77e-165	hypothetical protein F775_29958 [Aegilops tauschii]
TR170516_c1_g2_i2	4A	202170175	202172781	0.0109814	NA	NA	NA
TR170925_c0_g1_i3	4A	55561117	55561442	0.039752	gi|125543290|gb|EAY89429.1|	2.33e-26	hypothetical protein OsI_10937 [Oryza sativa Indica Group]
TR171936_c0_g1_i1	4A	81039076	81043065	0.0109975	gi|326490007|dbj|BAJ94077.1|	0	predicted protein [Hordeum vulgare subsp. vulgare]
TR172605_c0_g1_i1	4A	44342828	44346007	0.0295913	gi|326495354|dbj|BAJ85773.1|	2e-101	predicted protein [Hordeum vulgare subsp. vulgare]
TR172657_c2_g1_i7	4A	203802269	203804653	0.0146329	gi|326505084|dbj|BAK02929.1|	1.25e-150	predicted protein [Hordeum vulgare subsp. vulgare]
TR176296_c0_g1_i2	4A	143680061	143681733	0.00800913	gi|326515790|dbj|BAK07141.1|	0	predicted protein [Hordeum vulgare subsp. vulgare]
TR179033_c0_g1_i2	4A	184457683	184459446	0.0242222	gi|474400224|gb|EMS65992.1|	0	GDP-mannose 4,6 dehydratase 2 [Triticum urartu]
TR183710_c3_g3_i5	4A	170388440	170391079	0.00235141	gi|326526277|dbj|BAJ97155.1|	7.32e-137	predicted protein [Hordeum vulgare subsp. vulgare]
TR184445_c4_g1_i3	4A	127878007	127879814	0.0134033	gi|474174830|gb|EMS57730.1|	3.55e-137	Peroxidase 4 [Triticum urartu]
TR185487_c0_g1_i1	4A	181546351	181549613	0.0100519	gi|326499826|dbj|BAJ90748.1|	7.34e-106	predicted protein, partial [Hordeum vulgare subsp. vulgare]
TR190991_c0_g1_i1	4A	40674012	40678786	0.00437795	gi|326522678|dbj|BAJ88385.1|	1.83e-150	predicted protein [Hordeum vulgare subsp. vulgare]
TR192345_c0_g1_i3	4A	64631203	64634521	0.0382018	gi|474411879|gb|EMS66883.1|	6.94e-165	Hsp70 nucleotide exchange factor fes1 [Triticum urartu]
TR195175_c0_g1_i9	4A	167321441	167323738	0.0107448	gi|473930437|gb|EMS49964.1|	1.6e-81	hypothetical protein TRIUR3_26988 [Triticum urartu]
TR196286_c0_g1_i3	4A	56439629	56441292	0.00518324	gi|474434231|gb|EMS68137.1|	2.01e-12	hypothetical protein TRIUR3_12323 [Triticum urartu]
TR197307_c0_g1_i1	4A	25198075	25199726	0.0346346	gi|357113402|ref|XP_003558492.1|	0	PREDICTED: pentatricopeptide repeat-containing protein At4g16390, chloroplastic [Brachypodium distachyon]
TR207188_c1_g3_i8	4A	186937916	186939849	0.0221647	gi|326497135|dbj|BAK02152.1|	1.05e-170	predicted protein [Hordeum vulgare subsp. vulgare]
TR208341_c2_g4_i4	4A	52489008	52490726	0.0382467	gi|473890022|gb|EMS48574.1|	8.87e-87	Ubiquitin-60S ribosomal protein L40-2 [Triticum urartu]
TR210642_c0_g1_i4	4A	104571793	104572471	0.0109628	gi|475594007|gb|EMT22564.1|	8.85e-116	Thioredoxin [Aegilops tauschii]
TR216754_c0_g1_i1	4A	29491441	29495137	0.0298857	gi|326489899|dbj|BAJ94023.1|	2.96e-138	predicted protein [Hordeum vulgare subsp. vulgare]
TR216876_c0_g1_i4	4A	60856772	60858955	0.0468216	gi|326494602|dbj|BAJ94420.1|	0	predicted protein [Hordeum vulgare subsp. vulgare]
TR217078_c0_g2_i3	4A	198099712	198101054	0.00258087	NA	NA	NA
TR217602_c1_g1_i1	4A	2883205	2887862	0.0176698	gi|157362217|dbj|BAF80308.1|	0	chloroplastic glutathione reductase [Hordeum vulgare subsp. vulgare]
TR219208_c0_g3_i22	4A	181639614	181652324	0.00974888	gi|224365602|gb|ACN41354.1|	0	LR34 [Triticum aestivum]
TR219452_c0_g1_i1	4A	43707483	43715003	0.000732898	gi|326533978|dbj|BAJ93762.1|	5.64e-144	predicted protein [Hordeum vulgare subsp. vulgare]
TR219452_c0_g1_i2	4A	43707483	43715003	0.0478633	gi|326533978|dbj|BAJ93762.1|	8.22e-151	predicted protein [Hordeum vulgare subsp. vulgare]
TR221329_c1_g1_i1	4A	196906906	196908982	0.0368985	gi|224365603|gb|ACN41355.1|	0	cytochrome P450 [Triticum aestivum]
TR222682_c0_g1_i1	4A	27314277	27316353	0.00810819	gi|473780471|gb|EMS46048.1|	0	Endo-1,4-beta-xylanase C [Triticum urartu]
TR223510_c1_g2_i3	4A	30494782	30497306	0.0457736	gi|475602564|gb|EMT25176.1|	8.07e-155	3-ketoacyl-CoA synthase 4 [Aegilops tauschii]
TR226621_c0_g1_i10	4A	57949614	57952774	0.0160513	gi|475503875|gb|EMT04578.1|	0	hypothetical protein F775_00061 [Aegilops tauschii]
TR228485_c0_g3_i1	4A	140421559	140428084	0.023951	gi|721677674|ref|XP_010237798.1|	0	PREDICTED: non-lysosomal glucosylceramidase isoform X1 [Brachypodium distachyon]
TR231097_c0_g1_i3	4A	206779739	206781295	0.0126146	gi|475583421|gb|EMT19452.1|	1.12e-167	hypothetical protein F775_30045 [Aegilops tauschii]
TR233726_c0_g1_i1	4A	31059494	31062421	0.0024635	gi|326530710|dbj|BAK01153.1|	0	predicted protein [Hordeum vulgare subsp. vulgare]
TR235665_c0_g1_i2	4A	167132534	167134902	0.00305651	gi|326510673|dbj|BAJ87553.1|	2.16e-70	predicted protein [Hordeum vulgare subsp. vulgare]
TR237578_c0_g1_i1	4A	134090126	134092485	0.0174712	gi|326498187|dbj|BAJ94956.1|	0	predicted protein [Hordeum vulgare subsp. vulgare]
TR238666_c0_g2_i4	4A	61732875	61733883	0.0463893	gi|357113138|ref|XP_003558361.1|	0	PREDICTED: uncharacterized protein LOC100843093 [Brachypodium distachyon]
TR238666_c0_g2_i5	4A	61734311	61735901	0.0370938	gi|357113138|ref|XP_003558361.1|	0	PREDICTED: uncharacterized protein LOC100843093 [Brachypodium distachyon]
TR238666_c0_g5_i2	4A	61734311	61735901	0.0424738	gi|357113138|ref|XP_003558361.1|	3.95e-44	PREDICTED: uncharacterized protein LOC100843093 [Brachypodium distachyon]
TCONS_00093695	4B	205336	205576	0.0351082	gi|474342643|gb|EMS62712.1|	0	hypothetical protein TRIUR3_21504 [Triticum urartu]
TCONS_00093889	4B	7450118	7452298	0.0159601	gi|357115604|ref|XP_003559578.1|	0	PREDICTED: uncharacterized protein LOC100828435 [Brachypodium distachyon]
TCONS_00094057	4B	12588431	12590218	0.00432351	gi|721606841|ref|XP_010230871.1|	0	PREDICTED: UDP-glycosyltransferase 91B1-like [Brachypodium distachyon]
TCONS_00094380	4B	42590528	42591064	0.00121211	gi|326514694|dbj|BAJ99708.1|	4.86e-98	predicted protein [Hordeum vulgare subsp. vulgare]
TCONS_00094406	4B	44492722	44492755	0.0109866	gi|473937073|gb|EMS50194.1|	3.79e-54	hypothetical protein TRIUR3_23917 [Triticum urartu]
TCONS_00094503	4B	55857317	55857812	0.00146363	gi|498742|emb|CAA84023.1|	0	beta-ketoacyl-ACP synthase [Hordeum vulgare subsp. vulgare]
TCONS_00094718	4B	80585116	80586733	0.013534	gi|514754647|ref|XP_004963087.1|	1.7e-132	PREDICTED: protein prenyltransferase alpha subunit repeat-containing protein 1-B [Setaria italica]
TCONS_00094967	4B	97518874	97519036	0.00429752	gi|475470936|gb|EMT02404.1|	1.94e-75	hypothetical protein F775_23238 [Aegilops tauschii]
TCONS_00095153	4B	108740166	108740919	0.03508	gi|326522797|dbj|BAJ88444.1|	0	predicted protein [Hordeum vulgare subsp. vulgare]
TCONS_00095204	4B	110624912	110625213	0.0414247	gi|474365594|gb|EMS63479.1|	7.26e-174	WW domain-containing oxidoreductase [Triticum urartu]
TCONS_00095539	4B	141179080	141179457	0.00715705	gi|475599590|gb|EMT24277.1|	1.03e-84	Elongation factor P [Aegilops tauschii]
TCONS_00095934	4B	181038207	181038681	0.00837047	gi|326496148|dbj|BAJ90695.1|	9.32e-13	predicted protein [Hordeum vulgare subsp. vulgare]
TCONS_00096102	4B	190356211	190357465	0.0040916	gi|326533392|dbj|BAJ93668.1|	0	predicted protein [Hordeum vulgare subsp. vulgare]
TCONS_00096466	4B	217978810	217979308	0.00570858	gi|475515145|gb|EMT05811.1|	0	Putative membrane protein [Aegilops tauschii]
TCONS_00096533	4B	222849844	222850265	0.0012156	gi|475605290|gb|EMT26018.1|	5.23e-110	B3 domain-containing protein [Aegilops tauschii]
TCONS_00096560	4B	227717185	227717903	0.0448618	NA	NA	NA
TCONS_00096833	4B	243776454	243776839	0.0125431	gi|326508462|dbj|BAJ95753.1|	3.36e-91	predicted protein [Hordeum vulgare subsp. vulgare]
TCONS_00096928	4B	249958371	249961946	0.008173	gi|242089979|ref|XP_002440822.1|	7.97e-57	hypothetical protein SORBIDRAFT_09g007400 [Sorghum bicolor]
TCONS_00097074	4B	256673901	256674334	0.0400932	gi|326518140|dbj|BAK07322.1|	0	predicted protein [Hordeum vulgare subsp. vulgare]
TCONS_00097204	4B	264736205	264736486	0.0250824	gi|473813893|gb|EMS46862.1|	4.32e-24	hypothetical protein TRIUR3_30470 [Triticum urartu]
TCONS_00097290	4B	270556646	270557431	0.0190044	NA	NA	NA
TCONS_00097458	4B	281753600	281754148	0.0453707	gi|475487584|gb|EMT03315.1|	0	putative Glutathione reductase, chloroplastic [Aegilops tauschii]
TCONS_00097738	4B	294875303	294875494	0.013507	gi|326522749|dbj|BAJ88420.1|	2.09e-164	predicted protein [Hordeum vulgare subsp. vulgare]
TCONS_00098032	4B	308656052	308656226	0.0172218	gi|473912642|gb|EMS49627.1|	2.08e-37	hypothetical protein TRIUR3_08650 [Triticum urartu]
TCONS_00098071	4B	310595097	310595352	0.005222	gi|475563665|gb|EMT14327.1|	7.2e-146	hypothetical protein F775_32164 [Aegilops tauschii]
TCONS_00098086	4B	311376388	311376415	0.010817	gi|326528151|dbj|BAJ89127.1|	6.54e-122	predicted protein [Hordeum vulgare subsp. vulgare]
TCONS_00098317	4B	3533830	3534855	0.0380876	gi|473759102|gb|EMS45769.1|	1.55e-23	hypothetical protein TRIUR3_01385 [Triticum urartu]
TCONS_00098358	4B	6133434	6135150	0.00543827	gi|326517262|dbj|BAJ99997.1|	3.41e-72	predicted protein, partial [Hordeum vulgare subsp. vulgare]
TCONS_00098680	4B	22757842	22758282	0.000283193	gi|157312498|gb|ABV32166.1|	1.88e-81	UFG2 [Triticum aestivum]
TCONS_00098767	4B	40531596	40533018	0.0066382	gi|326507838|dbj|BAJ86662.1|	5.48e-133	predicted protein [Hordeum vulgare subsp. vulgare]
TCONS_00099023	4B	62327253	62327731	0.0177718	gi|326496815|dbj|BAJ98434.1|	5.28e-74	predicted protein [Hordeum vulgare subsp. vulgare]
TCONS_00099129	4B	74085156	74086106	0.029638	gi|474244829|gb|EMS59953.1|	2.59e-68	hypothetical protein TRIUR3_15489 [Triticum urartu]
TCONS_00099402	4B	101688266	101688786	0.00335354	gi|326503656|dbj|BAJ86334.1|	8.56e-140	predicted protein [Hordeum vulgare subsp. vulgare]
TCONS_00099403	4B	101688266	101688768	0.00973995	gi|326503656|dbj|BAJ86334.1|	2.38e-157	predicted protein [Hordeum vulgare subsp. vulgare]
TCONS_00099412	4B	102730790	102732227	0.00112274	gi|3122234|sp|O24473.1|IF2B_WHEAT	6.43e-179	RecName: Full=Eukaryotic translation initiation factor 2 subunit beta; Short=eIF-2-beta; AltName: Full=P38
TCONS_00099438	4B	103137805	103139958	0.0256995	gi|326517615|dbj|BAK03726.1|	0	predicted protein [Hordeum vulgare subsp. vulgare]
TCONS_00099500	4B	106018855	106019349	0.0216927	gi|721630134|ref|XP_010230166.1|	1.85e-67	PREDICTED: autophagy-related protein 18a-like [Brachypodium distachyon]
TCONS_00099504	4B	106036485	106037174	0.0176036	gi|475624131|gb|EMT32485.1|	0	Putative tRNA pseudouridine synthase [Aegilops tauschii]
TCONS_00099532	4B	108651886	108653531	0.0213348	gi|326520840|dbj|BAJ92783.1|	5.87e-135	predicted protein, partial [Hordeum vulgare subsp. vulgare]
TCONS_00099659	4B	112568610	112569392	0.00197806	gi|475572648|gb|EMT16555.1|	1.97e-36	hypothetical protein F775_32331 [Aegilops tauschii]
TCONS_00099936	4B	130657005	130657980	0.049132	gi|475622689|gb|EMT31949.1|	0	Myb family transcription factor APL [Aegilops tauschii]
TCONS_00100117	4B	145013600	145014318	0.0315485	gi|573950883|ref|XP_006657730.1|	3.05e-18	PREDICTED: large proline-rich protein BAG6-like isoform X2 [Oryza brachyantha]
TCONS_00100185	4B	148693569	148694167	0.0239022	gi|326518704|dbj|BAJ92513.1|	1.93e-118	predicted protein, partial [Hordeum vulgare subsp. vulgare]
TCONS_00100220	4B	152789170	152789695	0.0434703	gi|474369159|gb|EMS63685.1|	0	GTPase Der [Triticum urartu]
TCONS_00100420	4B	172615223	172615697	0.0493382	gi|475614758|gb|EMT29189.1|	7.76e-41	hypothetical protein F775_24122 [Aegilops tauschii]
TCONS_00100441	4B	174338440	174339091	1.03e-59	gi|326511236|dbj|BAJ87632.1|	0	predicted protein [Hordeum vulgare subsp. vulgare]
TCONS_00100442	4B	174338476	174339091	2.37e-05	gi|326511236|dbj|BAJ87632.1|	0	predicted protein [Hordeum vulgare subsp. vulgare]
TCONS_00100760	4B	193893431	193894135	0.00492445	gi|475515878|gb|EMT05911.1|	0	hypothetical protein F775_16110 [Aegilops tauschii]
TCONS_00100916	4B	206296201	206297520	0.015458	gi|326511021|dbj|BAJ91858.1|	2.18e-21	predicted protein, partial [Hordeum vulgare subsp. vulgare]
TCONS_00101204	4B	229459902	229460912	0.0328576	NA	NA	NA
TCONS_00101478	4B	246689135	246689897	0.0360236	gi|475540221|gb|EMT09561.1|	4.8e-54	hypothetical protein F775_08690 [Aegilops tauschii]
TCONS_00101577	4B	251071460	251071994	0.0446092	gi|474199227|gb|EMS58463.1|	6.78e-94	hypothetical protein TRIUR3_26055 [Triticum urartu]
TCONS_00101594	4B	251524050	251524415	0.025668	gi|475591178|gb|EMT21675.1|	8.38e-164	hypothetical protein F775_10137 [Aegilops tauschii]
TCONS_00101854	4B	263018952	263019773	0.0240228	gi|357120176|ref|XP_003561805.1|	9.34e-173	PREDICTED: solute carrier family 40 member 3, chloroplastic-like [Brachypodium distachyon]
TCONS_00101858	4B	263018952	263019773	0.0151805	gi|357120176|ref|XP_003561805.1|	3.18e-174	PREDICTED: solute carrier family 40 member 3, chloroplastic-like [Brachypodium distachyon]
TCONS_00101936	4B	267465755	267466291	0.0214235	gi|474427998|gb|EMS67827.1|	5.6e-25	hypothetical protein TRIUR3_31475 [Triticum urartu]
TCONS_00102036	4B	272746193	272746653	0.00382421	gi|475514847|gb|EMT05761.1|	1.16e-77	Mitochondrial import inner membrane translocase subunit TIM22 [Aegilops tauschii]
TCONS_00102186	4B	282774645	282776325	0.00671718	gi|475608596|gb|EMT27087.1|	4.89e-47	hypothetical protein F775_44096 [Aegilops tauschii]
TCONS_00102219	4B	283382844	283383387	0.00849636	gi|482691832|gb|AGK30596.1|	2.74e-168	glycerol-3-phosphate dehydrogenase [Triticum aestivum]
TCONS_00102287	4B	286295140	286295875	0.0249325	gi|473777272|gb|EMS45976.1|	4.14e-92	Crt-like protein 1 [Triticum urartu]
TCONS_00102317	4B	288104211	288104457	0.0126771	gi|474308741|gb|EMS61836.1|	2.79e-08	hypothetical protein TRIUR3_20374 [Triticum urartu]
TCONS_00102340	4B	288964100	288965037	0.0132695	gi|475589129|gb|EMT21077.1|	9.52e-45	hypothetical protein F775_42553 [Aegilops tauschii]
TCONS_00102412	4B	293838298	293839142	0.00951323	gi|326503002|dbj|BAJ99126.1|	5.85e-139	predicted protein, partial [Hordeum vulgare subsp. vulgare]
TCONS_00102442	4B	295650765	295652111	0.023962	gi|326508628|dbj|BAJ95836.1|	2.52e-156	predicted protein [Hordeum vulgare subsp. vulgare]
TCONS_00102451	4B	296045418	296046030	0.00672539	gi|326530366|dbj|BAJ97609.1|	9.56e-38	predicted protein [Hordeum vulgare subsp. vulgare]
TCONS_00102544	4B	300863782	300864055	0.000654615	gi|475611942|gb|EMT28258.1|	5.31e-57	Putative membrane protein [Aegilops tauschii]
TCONS_00102558	4B	301365482	301366444	0.00425207	gi|474370181|gb|EMS63796.1|	8.5e-113	Chitin elicitor-binding protein [Triticum urartu]
TCONS_00102839	4B	310458281	310459053	0.0472376	gi|944225739|gb|KQK90143.1|	2.64e-50	hypothetical protein SETIT_039246mg, partial [Setaria italica]
TCONS_00102962	4B	313285603	313286229	0.00954343	gi|475491719|gb|EMT03595.1|	0	hypothetical protein F775_02327 [Aegilops tauschii]
TCONS_00102994	4B	313783322	313784542	0.0121261	gi|475585091|gb|EMT19956.1|	2.49e-135	Putative receptor-like protein kinase [Aegilops tauschii]
TCONS_00103076	4B	316303071	316303542	0.0260539	gi|326514124|dbj|BAJ92212.1|	0	predicted protein [Hordeum vulgare subsp. vulgare]
TCONS_00103078	4B	316419506	316420593	0.00254859	gi|326531714|dbj|BAJ97861.1|	4.63e-112	predicted protein, partial [Hordeum vulgare subsp. vulgare]
TCONS_00103083	4B	316840377	316840723	0.00274554	gi|669031390|emb|CDM86349.1|	2.06e-16	unnamed protein product [Triticum aestivum]
TCONS_00103117	4B	10222204	10222805	1.18e-59	gi|475546600|gb|EMT10713.1|	2.48e-12	DNA topoisomerase 2 [Aegilops tauschii]
TCONS_00103206	4B	65598354	65600865	0.0140856	gi|475530187|gb|EMT07872.1|	4.51e-11	hypothetical protein F775_09046 [Aegilops tauschii]
TCONS_00103448	4B	214127803	214129258	0.000658548	NA	NA	NA
TCONS_00103514	4B	250822785	250823730	0.00188105	NA	NA	NA
TCONS_00103554	4B	273938566	273939637	0.0487629	NA	NA	NA
TCONS_00103602	4B	290846184	290847266	1.03e-59	gi|475546600|gb|EMT10713.1|	5.3e-12	DNA topoisomerase 2 [Aegilops tauschii]
TCONS_00103655	4B	308621892	308624019	0.0214508	gi|474311579|gb|EMS61924.1|	1.38e-13	Sex determination protein tasselseed-2 [Triticum urartu]
TCONS_00103657	4B	309189714	309190957	0.0100172	NA	NA	NA
TR125449_c0_g1_i1	4B	167604029	167610434	0.023942	NA	NA	NA
TR148343_c1_g1_i5	4B	313783322	313784542	0.0243131	gi|475585091|gb|EMT19956.1|	9.2e-125	Putative receptor-like protein kinase [Aegilops tauschii]
TR149980_c4_g1_i2	4B	243923446	243930674	0.0431123	gi|357113475|ref|XP_003558528.1|	0	PREDICTED: methionine--tRNA ligase, mitochondrial [Brachypodium distachyon]
TR150212_c1_g1_i1	4B	254487755	254492101	0.0338639	gi|326505950|dbj|BAJ91214.1|	2.46e-143	predicted protein [Hordeum vulgare subsp. vulgare]
TR153719_c0_g1_i1	4B	286921563	286923372	0.0286432	gi|326534162|dbj|BAJ89431.1|	2.26e-109	predicted protein [Hordeum vulgare subsp. vulgare]
TR155771_c0_g1_i1	4B	103162593	103166525	0.010567	gi|326495462|dbj|BAJ85827.1|	0	predicted protein [Hordeum vulgare subsp. vulgare]
TR159143_c3_g1_i1	4B	259650683	259651697	0.0191411	gi|475624602|gb|EMT32682.1|	2.98e-178	hypothetical protein F775_32600 [Aegilops tauschii]
TR164345_c0_g2_i1	4B	306095720	306097186	0.00700134	gi|326494488|dbj|BAJ90513.1|	9.23e-109	predicted protein [Hordeum vulgare subsp. vulgare]
TR166027_c1_g1_i2	4B	32755371	32758880	0.0392128	gi|169635147|gb|ACA58350.1|	1.03e-17	putative 26S proteasome regulatory complex protein [Sandersonia aurantiaca]
TR172278_c6_g1_i1	4B	9006185	9006910	0.017143	gi|475554629|gb|EMT12265.1|	5.71e-13	hypothetical protein F775_23973 [Aegilops tauschii]
TR172733_c0_g2_i1	4B	240119515	240120743	0.00769391	gi|357112665|ref|XP_003558128.1|	7.83e-22	PREDICTED: uncharacterized protein At5g01610-like [Brachypodium distachyon]
TR176386_c0_g1_i1	4B	259595015	259598740	0.0388966	gi|475627364|gb|EMT33635.1|	0	Translocase of chloroplast 34, chloroplastic [Aegilops tauschii]
TR181524_c0_g3_i7	4B	209867618	209870304	0.00879119	gi|474012697|gb|EMS52610.1|	5.65e-87	Cysteine-rich receptor-like protein kinase 26 [Triticum urartu]
TR182503_c1_g1_i2	4B	55010993	55012728	0.0117313	gi|125578031|gb|EAZ19253.1|	1.95e-50	hypothetical protein OsJ_34790 [Oryza sativa Japonica Group]
TR183501_c0_g3_i3	4B	102459369	102461056	0.0271029	gi|9757674|dbj|BAB08193.1|	2.54e-66	unnamed protein product [Oryza sativa Japonica Group]
TR192178_c3_g1_i3	4B	2972720	2975542	0.0424738	gi|475495197|gb|EMT03821.1|	0	LRR receptor-like serine/threonine-protein kinase GSO2 [Aegilops tauschii]
TR195121_c0_g1_i3	4B	9766268	9767670	0.0409729	gi|475564828|gb|EMT14626.1|	2.12e-89	hypothetical protein F775_31648 [Aegilops tauschii]
TR202853_c1_g1_i2	4B	277803629	277805119	0.0376852	gi|326502452|dbj|BAJ95289.1|	1.99e-56	predicted protein [Hordeum vulgare subsp. vulgare]
TR205438_c0_g5_i3	4B	11238835	11243239	0.0298492	gi|474351097|gb|EMS63014.1|	0	Lysyl-tRNA synthetase [Triticum urartu]
TR207759_c3_g2_i1	4B	24000885	24005147	0.0325782	gi|326493846|dbj|BAJ85385.1|	0	predicted protein [Hordeum vulgare subsp. vulgare]
TR209888_c0_g1_i1	4B	196462646	196474454	0.0236339	gi|326514408|dbj|BAJ96191.1|	1.99e-168	predicted protein [Hordeum vulgare subsp. vulgare]
TR212959_c1_g1_i1	4B	270556646	270557431	0.0451811	NA	NA	NA
TR212959_c1_g1_i13	4B	270556811	270557170	0.0241693	NA	NA	NA
TR212959_c1_g2_i2	4B	270556646	270557431	0.04192	NA	NA	NA
TR215734_c0_g2_i1	4B	292151871	292155052	0.0162023	gi|326502476|dbj|BAJ95301.1|	8.46e-137	predicted protein [Hordeum vulgare subsp. vulgare]
TR219375_c0_g1_i8	4B	126017692	126024461	0.0234218	gi|326503864|dbj|BAK02718.1|	3.11e-158	predicted protein [Hordeum vulgare subsp. vulgare]
TR228087_c2_g1_i1	4B	313783322	313784542	0.0186171	gi|475585091|gb|EMT19956.1|	1.23e-09	Putative receptor-like protein kinase [Aegilops tauschii]
TR231140_c1_g3_i2	4B	201747634	201753744	0.00390963	gi|326513054|dbj|BAK03434.1|	0	predicted protein [Hordeum vulgare subsp. vulgare]
TR232396_c0_g1_i1	4B	240610731	240611505	0.00263295	gi|475560185|gb|EMT13503.1|	3.02e-134	hypothetical protein F775_02335 [Aegilops tauschii]
TR73557_c0_g1_i1	4B	293266567	293267622	0.00171839	gi|721674384|ref|XP_010237310.1|	7.09e-63	PREDICTED: probable LRR receptor-like serine/threonine-protein kinase At3g47570 isoform X3 [Brachypodium distachyon]
TR82468_c0_g1_i1	4B	293149870	293151083	0.0184603	gi|944230615|gb|KQK95001.1|	0	hypothetical protein SETIT_028003mg [Setaria italica]
TCONS_00103712	4D	867218	867696	0.0353613	gi|357121098|ref|XP_003562258.1|	0	PREDICTED: protein TRANSPARENT TESTA 12 [Brachypodium distachyon]
TCONS_00103722	4D	934636	935092	0.0105553	gi|357116823|ref|XP_003560176.1|	0	PREDICTED: endoplasmic reticulum oxidoreductin-1-like isoform X1 [Brachypodium distachyon]
TCONS_00103808	4D	3460180	3460189	0.00148328	gi|217074728|gb|ACJ85724.1|	7.79e-12	unknown [Medicago truncatula]
TCONS_00103857	4D	4099110	4099261	0.0259114	gi|326495798|dbj|BAJ85995.1|	0	predicted protein [Hordeum vulgare subsp. vulgare]
TCONS_00103971	4D	6085594	6085724	0.0416886	gi|475572644|gb|EMT16551.1|	2.25e-52	hypothetical protein F775_32330 [Aegilops tauschii]
TCONS_00104046	4D	9488138	9488437	0.0464677	gi|326496609|dbj|BAJ98331.1|	7.84e-120	predicted protein [Hordeum vulgare subsp. vulgare]
TCONS_00104052	4D	9812909	9812979	0.0368202	gi|475446797|gb|EMT01574.1|	9.28e-162	hypothetical protein F775_16936 [Aegilops tauschii]
TCONS_00104159	4D	15114260	15114566	0.0128006	gi|514743464|ref|XP_004960391.1|	2.36e-163	PREDICTED: solute carrier family 40 member 3, chloroplastic-like [Setaria italica]
TCONS_00104213	4D	17713548	17714115	0.000225116	gi|326511236|dbj|BAJ87632.1|	0	predicted protein [Hordeum vulgare subsp. vulgare]
TCONS_00104264	4D	20269775	20270308	0.0124327	gi|326503864|dbj|BAK02718.1|	4.94e-137	predicted protein [Hordeum vulgare subsp. vulgare]
TCONS_00104487	4D	26493076	26493299	0.0273523	gi|475390840|gb|EMT00716.1|	2.07e-68	Protein FAR-RED ELONGATED HYPOCOTYL 3 [Aegilops tauschii]
TCONS_00104763	4D	38815726	38816556	0.0491016	gi|326518937|dbj|BAJ92629.1|	4.64e-122	predicted protein [Hordeum vulgare subsp. vulgare]
TCONS_00104807	4D	41491841	41492278	0.0193117	gi|326501942|dbj|BAK06463.1|	3.7e-105	predicted protein [Hordeum vulgare subsp. vulgare]
TCONS_00104910	4D	47049017	47049192	0.0408995	gi|944081839|gb|KQK17191.1|	9.09e-132	hypothetical protein BRADI_1g32951 [Brachypodium distachyon]
TCONS_00104976	4D	50517283	50518646	0.0274505	gi|326519010|dbj|BAJ92665.1|	4.31e-93	predicted protein [Hordeum vulgare subsp. vulgare]
TCONS_00105097	4D	55160353	55161408	0.0240726	gi|475565032|gb|EMT14682.1|	0	Disease resistance protein RGA2 [Aegilops tauschii]
TCONS_00105109	4D	55973747	55975414	0.0134766	gi|326505134|dbj|BAK02954.1|	1.37e-81	predicted protein [Hordeum vulgare subsp. vulgare]
TCONS_00105176	4D	59118528	59119714	0.0217378	gi|399414|sp|Q03033.1|EF1A_WHEAT	1.52e-117	RecName: Full=Elongation factor 1-alpha; Short=EF-1-alpha
TCONS_00105179	4D	59530725	59531456	0.0355727	gi|475443009|gb|EMT01486.1|	5.52e-08	hypothetical protein F775_18204 [Aegilops tauschii]
TCONS_00105208	4D	61125287	61125617	0.00266911	NA	NA	NA
TCONS_00105324	4D	67257555	67257941	0.046844	gi|474290770|gb|EMS61278.1|	0	putative dihydrodipicolinate reductase 2, chloroplastic [Triticum urartu]
TCONS_00105326	4D	67356926	67357532	0.00673732	gi|357157187|ref|XP_003577714.1|	0	PREDICTED: serine carboxypeptidase-like 42 [Brachypodium distachyon]
TCONS_00105339	4D	67906151	67907218	0.0181689	gi|326512038|dbj|BAJ96000.1|	2.85e-180	predicted protein [Hordeum vulgare subsp. vulgare]
TCONS_00105466	4D	75208115	75208586	0.0329082	gi|474391854|gb|EMS65397.1|	0	ABC transporter I family member 6, chloroplastic [Triticum urartu]
TCONS_00105533	4D	78882986	78883357	0.0319063	gi|326498669|dbj|BAK02320.1|	0	predicted protein [Hordeum vulgare subsp. vulgare]
TCONS_00105623	4D	83036716	83036848	0.0117179	gi|19225003|gb|AAL86479.1|AC077693_18	0	putative transposase [Oryza sativa Japonica Group]
TCONS_00105630	4D	83240906	83242191	0.0419124	gi|475602632|gb|EMT25188.1|	2.13e-97	RNA polymerase sigma factor rpoD [Aegilops tauschii]
TCONS_00105676	4D	88861535	88862008	0.0496876	gi|474445509|gb|EMS68572.1|	2.63e-06	hypothetical protein TRIUR3_20457 [Triticum urartu]
TCONS_00105710	4D	91855740	91856320	0.0119395	gi|475552606|gb|EMT11824.1|	5.1e-47	Nuclease S1 [Aegilops tauschii]
TCONS_00105825	4D	97967309	97967494	0.00594341	gi|224551502|gb|ACN54193.1|	1.06e-85	Clp-P protease subunit [Triticum aestivum]
TCONS_00105853	4D	100242723	100243077	0.0388691	gi|326494882|dbj|BAJ94560.1|	9.12e-117	predicted protein [Hordeum vulgare subsp. vulgare]
TCONS_00105985	4D	107877787	107878005	0.0115612	gi|475626899|gb|EMT33511.1|	0	GTP-binding protein hflX [Aegilops tauschii]
TCONS_00106098	4D	112688421	112688521	0.0111525	NA	NA	NA
TCONS_00106184	4D	114849081	114849578	0.0435701	gi|326506436|dbj|BAJ86536.1|	0	predicted protein [Hordeum vulgare subsp. vulgare]
TCONS_00106221	4D	115933236	115934476	0.0249468	gi|475571370|gb|EMT16230.1|	0	hypothetical protein F775_06704 [Aegilops tauschii]
TCONS_00106375	4D	120179352	120180585	0.0330927	gi|475614884|gb|EMT29233.1|	1.11e-103	hypothetical protein F775_19783 [Aegilops tauschii]
TCONS_00106399	4D	120886997	120887280	0.0215828	gi|475583920|gb|EMT19621.1|	2.67e-168	Rhomboid family member 1 [Aegilops tauschii]
TCONS_00106727	4D	13796110	13796226	0.0367347	gi|475550119|gb|EMT11400.1|	0	hypothetical protein F775_02232 [Aegilops tauschii]
TCONS_00106852	4D	18348116	18350213	0.00342483	gi|326506396|dbj|BAJ86516.1|	7.45e-46	predicted protein [Hordeum vulgare subsp. vulgare]
TCONS_00106963	4D	22798826	22799850	0.0274564	gi|40644802|emb|CAE53909.1|	1.51e-83	putative SWIM protein, partial [Triticum aestivum]
TCONS_00107023	4D	25948369	25950659	0.00159104	gi|475618916|gb|EMT30592.1|	1.3e-149	hypothetical protein F775_12885 [Aegilops tauschii]
TCONS_00107037	4D	26538914	26542605	0.0487545	gi|475591845|gb|EMT21898.1|	0	hypothetical protein F775_32629 [Aegilops tauschii]
TCONS_00107105	4D	29440414	29440695	0.0207248	gi|326533978|dbj|BAJ93762.1|	5.49e-148	predicted protein [Hordeum vulgare subsp. vulgare]
TCONS_00107210	4D	32442605	32445123	0.0296715	gi|475555025|gb|EMT12353.1|	0	hypothetical protein F775_17292 [Aegilops tauschii]
TCONS_00107217	4D	32887013	32887892	0.0258769	gi|475578262|gb|EMT18058.1|	0	Coleoptile phototropism protein 1 [Aegilops tauschii]
TCONS_00107224	4D	33758882	33759494	0.0296464	gi|115486819|ref|NP_001068553.1|	2.41e-59	Os11g0706100 [Oryza sativa Japonica Group]
TCONS_00107428	4D	43761537	43761887	0.0395686	gi|357149024|ref|XP_003574974.1|	3.56e-45	PREDICTED: 40S ribosomal protein S27-like [Brachypodium distachyon]
TCONS_00107463	4D	45860929	45861449	0.008364	gi|326513054|dbj|BAK03434.1|	4e-124	predicted protein [Hordeum vulgare subsp. vulgare]
TCONS_00107502	4D	48143408	48144427	0.0104075	gi|475599591|gb|EMT24278.1|	1.94e-82	Protein TOC75, chloroplastic [Aegilops tauschii]
TCONS_00107550	4D	50895408	50895854	0.0491906	gi|475546838|gb|EMT10766.1|	0	60S ribosomal protein L3 [Aegilops tauschii]
TCONS_00107592	4D	53531816	53532885	0.0144914	gi|474449930|gb|EMS68833.1|	0	Cysteine-rich receptor-like protein kinase 40 [Triticum urartu]
TCONS_00107679	4D	58721063	58721461	0.042085	gi|326504318|dbj|BAJ90991.1|	4.69e-06	predicted protein [Hordeum vulgare subsp. vulgare]
TCONS_00107755	4D	60962578	60963032	0.00451608	gi|721677859|ref|XP_010237827.1|	1.02e-152	PREDICTED: 60S ribosomal protein L10-1 [Brachypodium distachyon]
TCONS_00107779	4D	61626416	61628011	0.0433272	gi|475619151|gb|EMT30672.1|	0	Aspartic proteinase nepenthesin-2 [Aegilops tauschii]
TCONS_00107941	4D	68912149	68913984	0.0127562	gi|670406572|ref|XP_008644838.1|	1.29e-23	PREDICTED: putative ribonuclease H protein At1g65750 [Zea mays]
TCONS_00108036	4D	74819261	74819702	0.0370739	gi|326499099|dbj|BAK06040.1|	1.71e-08	predicted protein [Hordeum vulgare subsp. vulgare]
TCONS_00108045	4D	75695371	75695596	0.0189493	gi|326505348|dbj|BAK03061.1|	3.27e-160	predicted protein [Hordeum vulgare subsp. vulgare]
TCONS_00108219	4D	87524700	87525286	0.0263741	gi|326530828|dbj|BAK01212.1|	1.99e-143	predicted protein, partial [Hordeum vulgare subsp. vulgare]
TCONS_00108223	4D	87674146	87675711	0.00603727	NA	NA	NA
TCONS_00108384	4D	97139725	97140247	0.0372827	gi|836029917|ref|XP_012698529.1|	0	PREDICTED: phospholipid-transporting ATPase 1-like isoform X1 [Setaria italica]
TCONS_00108523	4D	107496801	107497342	0.0333577	gi|326504018|dbj|BAK02795.1|	0	predicted protein [Hordeum vulgare subsp. vulgare]
TCONS_00108791	4D	116442681	116443217	0.0232008	gi|475555386|gb|EMT12420.1|	0	GDSL esterase/lipase [Aegilops tauschii]
TCONS_00108906	4D	119408928	119409482	0.0210495	gi|475523089|gb|EMT06836.1|	0	hypothetical protein F775_30707 [Aegilops tauschii]
TCONS_00109030	4D	17250639	17251800	0.00534265	gi|937911027|dbj|BAS85947.1|	1.19e-12	Os03g0702600 [Oryza sativa Japonica Group]
TCONS_00109194	4D	91104120	91105652	0.0132789	NA	NA	NA
TCONS_00109249	4D	113546797	113547132	0.00203732	NA	NA	NA
TCONS_00109268	4D	118863246	118864669	0.0461025	gi|475590558|gb|EMT21505.1|	6.98e-60	Mismatch repair endonuclease PMS2 [Aegilops tauschii]
TR111930_c0_g1_i3	4D	65709353	65710216	0.0259792	gi|326524684|dbj|BAK04278.1|	4.53e-53	predicted protein [Hordeum vulgare subsp. vulgare]
TR141582_c0_g1_i3	4D	118138975	118142773	0.00268756	gi|6016585|sp|O49873.1|MLOH1_HORVU	2.24e-70	RecName: Full=MLO protein homolog 1
TR150315_c0_g1_i1	4D	35870663	35871384	0.00335728	gi|326521442|dbj|BAK00297.1|	0	predicted protein [Hordeum vulgare subsp. vulgare]
TR150315_c0_g1_i2	4D	35870663	35871384	0.0190219	gi|474008876|gb|EMS52491.1|	3.35e-128	U-box domain-containing protein 21 [Triticum urartu]
TR153441_c5_g1_i1	4D	28519558	28520499	0.0144893	gi|326499386|dbj|BAJ86004.1|	1.28e-144	predicted protein [Hordeum vulgare subsp. vulgare]
TR155743_c0_g1_i4	4D	75795628	75798766	0.0294651	gi|3396052|gb|AAC28850.1|	1.53e-21	MAP kinase homolog [Triticum aestivum]
TR159143_c3_g1_i5	4D	70160867	70163122	0.0136339	gi|475624602|gb|EMT32682.1|	8.7e-180	hypothetical protein F775_32600 [Aegilops tauschii]
TR168482_c0_g1_i2	4D	94454513	94458090	0.017963	gi|475546506|gb|EMT10698.1|	0	hypothetical protein F775_06509 [Aegilops tauschii]
TR182066_c0_g1_i3	4D	21603357	21608732	0.0439536	gi|399207756|gb|AFP33387.1|	0	Mn-specific cation diffusion facilitator transporter MTP8.1 [Hordeum vulgare]
TR189485_c2_g2_i1	4D	111144473	111146286	0.016208	gi|357112894|ref|XP_003558240.1|	0	PREDICTED: laccase-10-like [Brachypodium distachyon]
TR195211_c1_g1_i6	4D	97139725	97156238	0.0361564	gi|474372465|gb|EMS63955.1|	0	Phospholipid-transporting ATPase 1 [Triticum urartu]
TR196270_c0_g1_i2	4D	119908013	119910992	0.0457865	gi|326508776|dbj|BAJ95910.1|	9.05e-84	predicted protein [Hordeum vulgare subsp. vulgare]
TR196270_c0_g1_i3	4D	119908013	119910992	0.00679457	gi|326508776|dbj|BAJ95910.1|	2.49e-50	predicted protein [Hordeum vulgare subsp. vulgare]
TR196949_c0_g1_i3	4D	116241107	116241764	0.00741187	gi|326489689|dbj|BAK01825.1|	0	predicted protein [Hordeum vulgare subsp. vulgare]
TR204858_c0_g2_i8	4D	108477226	108478272	0.00151538	gi|14009833|gb|AAK51797.1|AF350423_1	1.56e-66	small heat shock protein HSP17.8 [Triticum aestivum]
TR207772_c0_g1_i4	4D	120604333	120610290	0.0273367	gi|475563666|gb|EMT14328.1|	0	Hydroxymethylglutaryl-CoA synthase [Aegilops tauschii]
TR212158_c5_g1_i7	4D	116442681	116444505	0.00250771	gi|475555386|gb|EMT12420.1|	0	GDSL esterase/lipase [Aegilops tauschii]
TR214221_c0_g1_i4	4D	112308708	112310596	0.0235713	gi|475570141|gb|EMT15949.1|	5.41e-109	50S ribosomal protein L18, chloroplastic [Aegilops tauschii]
TR214221_c0_g1_i5	4D	112308708	112310596	0.0234257	gi|475570141|gb|EMT15949.1|	1.46e-111	50S ribosomal protein L18, chloroplastic [Aegilops tauschii]
TR215212_c0_g1_i1	4D	48899165	48899989	0.00878845	gi|326489362|dbj|BAK01664.1|	1.45e-108	predicted protein [Hordeum vulgare subsp. vulgare]
TR216894_c1_g1_i5	4D	120850691	120854251	0.00337057	gi|475617700|gb|EMT30219.1|	1.42e-135	Nucleoside-triphosphatase [Aegilops tauschii]
TR222667_c0_g3_i6	4D	112543163	112545991	0.0460717	gi|326529305|dbj|BAK01046.1|	2.27e-69	predicted protein [Hordeum vulgare subsp. vulgare]
TR226656_c0_g3_i3	4D	119908013	119910992	0.000520152	gi|357114290|ref|XP_003558933.1|	9.11e-70	PREDICTED: uncharacterized protein LOC100838734 [Brachypodium distachyon]
TR235679_c3_g1_i2	4D	78882986	78886173	0.0453531	gi|326498669|dbj|BAK02320.1|	1.56e-85	predicted protein [Hordeum vulgare subsp. vulgare]
TR83767_c0_g1_i1	4D	118206152	118208022	1.31e-05	gi|473763677|gb|EMS45869.1|	0	Cytochrome P450 86B1 [Triticum urartu]
TCONS_00109351	5A	2174871	2175850	0.0133806	gi|474019593|gb|EMS52823.1|	0	Chromosome-associated kinesin KIF4A [Triticum urartu]
TCONS_00109401	5A	6960504	6961024	0.0183828	gi|474369253|gb|EMS63696.1|	0	Enoyl-[acyl-carrier-protein] reductase [NADH], chloroplastic [Triticum urartu]
TCONS_00109408	5A	8732803	8735636	0.0223176	gi|475551854|gb|EMT11702.1|	0	hypothetical protein F775_07618 [Aegilops tauschii]
TCONS_00109524	5A	22021830	22022003	0.0126332	gi|473997722|gb|EMS52112.1|	0	Elongation factor Ts [Triticum urartu]
TCONS_00109826	5A	52818132	52818162	0.00717608	gi|474407272|gb|EMS66571.1|	2.93e-66	Serine/threonine-protein kinase HT1 [Triticum urartu]
TCONS_00110055	5A	72790782	72791025	0.0449915	gi|937912632|dbj|BAS87551.1|	5.53e-11	Os04g0107900, partial [Oryza sativa Japonica Group]
TCONS_00110188	5A	77640653	77641326	0.0315502	gi|326499918|dbj|BAJ90794.1|	2.17e-15	predicted protein [Hordeum vulgare subsp. vulgare]
TCONS_00110317	5A	88725849	88725961	0.0219719	gi|326496130|dbj|BAJ90686.1|	2.5e-111	predicted protein [Hordeum vulgare subsp. vulgare]
TCONS_00110366	5A	91809453	91809558	0.0303412	gi|473817187|gb|EMS46908.1|	0	ERD1 protein, chloroplastic [Triticum urartu]
TCONS_00110409	5A	94257496	94258295	0.00836888	gi|474259597|gb|EMS60495.1|	0	hypothetical protein TRIUR3_03961 [Triticum urartu]
TCONS_00110468	5A	97155737	97156296	0.0345835	gi|326509379|dbj|BAJ91606.1|	0	predicted protein [Hordeum vulgare subsp. vulgare]
TCONS_00110554	5A	102168520	102168550	0.00937021	gi|475558307|gb|EMT13053.1|	4.68e-154	Kelch-like protein 7 [Aegilops tauschii]
TCONS_00110581	5A	103319209	103320683	3.75e-05	gi|474191178|gb|EMS58187.1|	8.1e-50	hypothetical protein TRIUR3_10600 [Triticum urartu]
TCONS_00110643	5A	105266302	105267204	0.0288595	gi|475587627|gb|EMT20603.1|	0	DnaJ protein-like protein [Aegilops tauschii]
TCONS_00110666	5A	106719090	106721661	0.0484107	gi|475563081|gb|EMT14194.1|	0	hypothetical protein F775_06585 [Aegilops tauschii]
TCONS_00110694	5A	108385106	108385164	0.0464273	gi|475440384|gb|EMT01426.1|	3.55e-116	Putative receptor-like protein kinase [Aegilops tauschii]
TCONS_00110767	5A	111180690	111181923	0.0354298	gi|474103566|gb|EMS55356.1|	1.66e-28	30S ribosomal protein S9, chloroplastic [Triticum urartu]
TCONS_00110973	5A	120987176	120987886	0.0271107	gi|326512268|dbj|BAJ96115.1|	0	predicted protein [Hordeum vulgare subsp. vulgare]
TCONS_00111005	5A	122349726	122350183	0.0307724	gi|326487496|dbj|BAJ89732.1|	1.83e-148	predicted protein [Hordeum vulgare subsp. vulgare]
TCONS_00111087	5A	126102462	126103018	0.0169128	gi|475592055|gb|EMT21965.1|	1.89e-42	hypothetical protein F775_26893 [Aegilops tauschii]
TCONS_00111165	5A	128827427	128828192	0.0146151	gi|474449581|gb|EMS68778.1|	0	Riboflavin biosynthesis protein RibD [Triticum urartu]
TCONS_00111307	5A	135593577	135594103	0.0325988	gi|475616403|gb|EMT29749.1|	0	Putative mscS family protein [Aegilops tauschii]
TCONS_00111346	5A	137666135	137666686	0.0396506	gi|51592190|emb|CAE46394.1|	9.65e-51	nucleotide pyrophosphatase/phosphodiesterase, partial (chloroplast) [Hordeum vulgare]
TCONS_00111354	5A	138095275	138095356	0.0453048	gi|326528861|dbj|BAJ97452.1|	0	predicted protein [Hordeum vulgare subsp. vulgare]
TCONS_00111357	5A	138102301	138102326	0.0179813	gi|474408652|gb|EMS66665.1|	4.4e-39	Dihydroflavonol-4-reductase [Triticum urartu]
TCONS_00111388	5A	139598644	139598881	0.00013595	gi|475605244|gb|EMT26002.1|	3.11e-36	hypothetical protein F775_33227 [Aegilops tauschii]
TCONS_00111637	5A	10606489	10607170	0.0466992	gi|474256784|gb|EMS60404.1|	5.36e-117	hypothetical protein TRIUR3_10953 [Triticum urartu]
TCONS_00111692	5A	19001342	19002083	0.0352223	gi|474004755|gb|EMS52356.1|	4.19e-08	hypothetical protein TRIUR3_29723 [Triticum urartu]
TCONS_00111828	5A	33472304	33472916	0.0360085	gi|475592476|gb|EMT22081.1|	1.67e-139	hypothetical protein F775_05575 [Aegilops tauschii]
TCONS_00112026	5A	50693886	50694421	0.017295	gi|475594731|gb|EMT22794.1|	7.33e-30	hypothetical protein F775_26046 [Aegilops tauschii]
TCONS_00112186	5A	67298182	67298549	0.00108576	gi|474387986|gb|EMS65125.1|	3.7e-06	hypothetical protein TRIUR3_17667 [Triticum urartu]
TCONS_00112392	5A	77835333	77835708	0.0193375	gi|326499918|dbj|BAJ90794.1|	2.03e-45	predicted protein [Hordeum vulgare subsp. vulgare]
TCONS_00112439	5A	80693816	80694249	0.00977274	gi|326516620|dbj|BAJ92465.1|	3.19e-38	predicted protein [Hordeum vulgare subsp. vulgare]
TCONS_00112603	5A	91190709	91191151	0.025818	gi|473817188|gb|EMS46909.1|	9.32e-53	putative inactive purple acid phosphatase 29 [Triticum urartu]
TCONS_00112861	5A	103601484	103602195	0.0412897	NA	NA	NA
TCONS_00113185	5A	116099705	116100293	0.00130637	gi|121489513|emb|CAJ56059.1|	3.61e-12	dehydrin 1 [Triticum turgidum subsp. durum]
TCONS_00113300	5A	120800064	120800153	0.0400045	gi|474417892|gb|EMS67325.1|	1.26e-157	Calcium-dependent protein kinase 1 [Triticum urartu]
TCONS_00113387	5A	123013764	123014037	0.0144133	gi|475378109|gb|EMT00619.1|	1.81e-61	Putative peroxisomal (S)-2-hydroxy-acid oxidase 1 [Aegilops tauschii]
TCONS_00113571	5A	130275381	130275874	0.0286833	gi|474406075|gb|EMS66512.1|	1.61e-97	Transcription antitermination protein nusG [Triticum urartu]
TCONS_00113648	5A	132313351	132313627	0.0346368	gi|326516966|dbj|BAJ96475.1|	2.41e-127	predicted protein [Hordeum vulgare subsp. vulgare]
TCONS_00113657	5A	133008474	133008967	0.0209101	gi|475535410|gb|EMT08743.1|	2.89e-35	hypothetical protein F775_32323 [Aegilops tauschii]
TCONS_00113672	5A	133856625	133857106	0.0135107	gi|474384908|gb|EMS64866.1|	1.39e-113	ATP phosphoribosyltransferase [Triticum urartu]
TCONS_00113712	5A	136567254	136567637	0.000373445	gi|473933024|gb|EMS50025.1|	1.76e-121	hypothetical protein TRIUR3_24696 [Triticum urartu]
TCONS_00113990	5A	36486323	36487174	0.0363661	NA	NA	NA
TCONS_00114173	5A	95943679	95944224	0.0445993	NA	NA	NA
TCONS_00114256	5A	111981197	111981561	0.0122797	NA	NA	NA
TCONS_00114261	5A	112771850	112772421	0.0182864	gi|326528537|dbj|BAJ93450.1|	2.68e-23	predicted protein [Hordeum vulgare subsp. vulgare]
TCONS_00114312	5A	120748654	120749525	0.0240373	NA	NA	NA
TR104410_c0_g2_i1	5A	110088346	110092856	0.0465385	gi|326513832|dbj|BAJ87934.1|	0	predicted protein [Hordeum vulgare subsp. vulgare]
TR107022_c0_g1_i2	5A	102690208	102694394	0.0264314	gi|475601928|gb|EMT24985.1|	0	Fatty acyl-CoA reductase 1 [Aegilops tauschii]
TR154956_c2_g1_i4	5A	80415280	80418760	0.0163388	gi|474239012|gb|EMS59702.1|	7.05e-177	hypothetical protein TRIUR3_06997 [Triticum urartu]
TR163166_c2_g5_i1	5A	126905787	126908458	0.0328331	gi|326533390|dbj|BAJ93667.1|	7.54e-22	predicted protein [Hordeum vulgare subsp. vulgare]
TR174130_c1_g1_i4	5A	76409530	76420288	0.0294448	gi|473910189|gb|EMS49508.1|	0	Calcium-transporting ATPase 8, plasma membrane-type [Triticum urartu]
TR174130_c1_g1_i7	5A	76409530	76420288	5.54e-05	gi|473910189|gb|EMS49508.1|	2.39e-134	Calcium-transporting ATPase 8, plasma membrane-type [Triticum urartu]
TR178755_c0_g1_i2	5A	122969741	122971989	0.046061	gi|326501358|dbj|BAJ98910.1|	1.26e-53	predicted protein [Hordeum vulgare subsp. vulgare]
TR188210_c4_g1_i2	5A	146473497	146478637	0.0262846	gi|474089050|gb|EMS54795.1|	0	hypothetical protein TRIUR3_05584 [Triticum urartu]
TR189614_c0_g3_i1	5A	108184963	108186681	0.000865559	gi|474370382|gb|EMS63808.1|	9.37e-09	Transcription factor bHLH92 [Triticum urartu]
TR205166_c0_g1_i5	5A	130138068	130138494	0.0315499	gi|474111623|gb|EMS55679.1|	2.68e-46	hypothetical protein TRIUR3_04852 [Triticum urartu]
TR207091_c2_g2_i2	5A	95944328	95946020	0.00973101	gi|326488591|dbj|BAJ93964.1|	0	predicted protein [Hordeum vulgare subsp. vulgare]
TR207091_c2_g2_i3	5A	95944328	95946020	0.022627	gi|326510863|dbj|BAJ91779.1|	0	predicted protein [Hordeum vulgare subsp. vulgare]
TR216894_c1_g1_i1	5A	142932784	142935230	0.000662924	gi|475617700|gb|EMT30219.1|	0	Nucleoside-triphosphatase [Aegilops tauschii]
TR216975_c0_g1_i1	5A	73531770	73535497	0.0214861	gi|326532336|dbj|BAK05097.1|	2.07e-63	predicted protein [Hordeum vulgare subsp. vulgare]
TR222617_c0_g2_i1	5A	147786836	147792034	0.0407715	gi|474142091|gb|EMS56564.1|	6.92e-137	Serine/threonine-protein kinase fray2 [Triticum urartu]
TR239183_c0_g1_i1	5A	83111408	83114272	0.00129467	gi|475542567|gb|EMT09984.1|	0	U-box domain-containing protein 33 [Aegilops tauschii]
TCONS_00114472	5B	1636875	1637171	0.00367256	gi|326496040|dbj|BAJ90641.1|	0	predicted protein [Hordeum vulgare subsp. vulgare]
TCONS_00114656	5B	9103200	9104044	0.0277776	gi|430900057|gb|AGA83648.1|	0	9-cis-epoxycarotenoid dioxygenase [Triticum aestivum]
TCONS_00114657	5B	9103200	9105873	0.00766521	gi|430900057|gb|AGA83648.1|	0	9-cis-epoxycarotenoid dioxygenase [Triticum aestivum]
TCONS_00114731	5B	17099858	17099888	0.000688831	gi|465482|sp|Q01482.1|WIR1A_WHEAT	7.14e-31	RecName: Full=Protein WIR1A
TCONS_00115052	5B	35555943	35559909	0.0322333	gi|475605423|gb|EMT26056.1|	0	Putative receptor protein kinase ZmPK1 [Aegilops tauschii]
TCONS_00115165	5B	40646791	40647566	0.0378436	gi|473886946|gb|EMS48193.1|	2.88e-56	hypothetical protein TRIUR3_19270 [Triticum urartu]
TCONS_00115373	5B	51146417	51146574	0.0258257	gi|475584817|gb|EMT19880.1|	1.61e-30	Putative LRR receptor-like serine/threonine-protein kinase [Aegilops tauschii]
TCONS_00115480	5B	64549737	64550823	0.0154456	gi|474259381|gb|EMS60476.1|	6.93e-15	hypothetical protein TRIUR3_31439 [Triticum urartu]
TCONS_00115584	5B	70949606	70950840	0.0128599	gi|475569383|gb|EMT15746.1|	1.55e-99	Zinc finger protein 7 [Aegilops tauschii]
TCONS_00115652	5B	77964237	77964450	0.0252935	gi|473906129|gb|EMS49379.1|	2.19e-109	Retrovirus-related Pol polyprotein LINE-1 [Triticum urartu]
TCONS_00115653	5B	78311684	78312079	0.0415582	gi|326520724|dbj|BAJ92725.1|	2.3e-78	predicted protein [Hordeum vulgare subsp. vulgare]
TCONS_00115757	5B	84525540	84525704	0.0497099	gi|475545030|gb|EMT10427.1|	4.11e-134	20 kDa chaperonin, chloroplastic [Aegilops tauschii]
TCONS_00115767	5B	84961080	84961151	0.0209327	gi|326488737|dbj|BAJ97980.1|	0	predicted protein [Hordeum vulgare subsp. vulgare]
TCONS_00115923	5B	95256036	95256179	0.0432975	gi|326488325|dbj|BAJ93831.1|	1.26e-158	predicted protein [Hordeum vulgare subsp. vulgare]
TCONS_00116021	5B	103368612	103368967	0.0399361	gi|475497705|gb|EMT04027.1|	0	hypothetical protein F775_52077 [Aegilops tauschii]
TCONS_00116058	5B	106507056	106507434	0.0298174	gi|357158260|ref|XP_003578069.1|	0	PREDICTED: DEAD-box ATP-dependent RNA helicase 22 [Brachypodium distachyon]
TCONS_00116118	5B	110234725	110235702	0.00605586	gi|473950352|gb|EMS50675.1|	7.8e-18	putative xyloglucan endotransglucosylase/hydrolase protein 32 [Triticum urartu]
TCONS_00116162	5B	112693094	112693577	0.0271622	gi|473838741|gb|EMS47277.1|	0	putative WRKY transcription factor 41 [Triticum urartu]
TCONS_00116357	5B	127544130	127544331	0.0499611	gi|308080618|ref|NP_001183606.1|	2.3e-127	uncharacterized LOC100502200 [Zea mays]
TCONS_00116383	5B	128789233	128791436	0.0261759	gi|326520870|dbj|BAJ92798.1|	1.05e-123	predicted protein [Hordeum vulgare subsp. vulgare]
TCONS_00116416	5B	131282350	131284763	0.00674735	gi|326513864|dbj|BAJ87950.1|	1.73e-109	predicted protein [Hordeum vulgare subsp. vulgare]
TCONS_00116505	5B	139596808	139599091	0.010693	gi|473953718|gb|EMS50815.1|	3.45e-39	hypothetical protein TRIUR3_22948 [Triticum urartu]
TCONS_00116737	5B	155854526	155855668	0.0302735	gi|326492069|dbj|BAJ98259.1|	0	predicted protein [Hordeum vulgare subsp. vulgare]
TCONS_00116774	5B	157305578	157305929	0.0240788	gi|475607306|gb|EMT26667.1|	0	Beta-1,3-galactosyltransferase 7 [Aegilops tauschii]
TCONS_00116812	5B	159418779	159419095	0.0124654	gi|475603688|gb|EMT25499.1|	1.75e-122	Protein Mpv17 [Aegilops tauschii]
TCONS_00116834	5B	161352415	161352755	0.0108808	gi|326495242|dbj|BAJ85717.1|	4.16e-124	predicted protein [Hordeum vulgare subsp. vulgare]
TCONS_00116896	5B	165934044	165935002	3.88e-05	gi|475552697|gb|EMT11844.1|	0	hypothetical protein F775_18606 [Aegilops tauschii]
TCONS_00116975	5B	170563162	170563508	0.0284441	gi|357153850|ref|XP_003576587.1|	3.08e-107	PREDICTED: homeobox-leucine zipper protein HOX11 [Brachypodium distachyon]
TCONS_00117129	5B	176917529	176917719	0.0301547	gi|475554307|gb|EMT12203.1|	0	hypothetical protein F775_06065 [Aegilops tauschii]
TCONS_00117197	5B	179486485	179486606	0.0013848	gi|473933913|gb|EMS50093.1|	7.18e-92	60S ribosomal protein L32-1 [Triticum urartu]
TCONS_00117285	5B	183286888	183287995	0.038206	gi|326491435|dbj|BAJ94195.1|	1.31e-31	predicted protein [Hordeum vulgare subsp. vulgare]
TCONS_00117391	5B	188029204	188030521	0.0296048	gi|326487886|dbj|BAJ89782.1|	3.89e-160	predicted protein [Hordeum vulgare subsp. vulgare]
TCONS_00117816	5B	208195013	208195853	0.00714153	gi|721682157|ref|XP_010238474.1|	0	PREDICTED: G-type lectin S-receptor-like serine/threonine-protein kinase B120 [Brachypodium distachyon]
TCONS_00117911	5B	212129712	212130027	0.0384739	gi|326500926|dbj|BAJ95129.1|	0	predicted protein [Hordeum vulgare subsp. vulgare]
TCONS_00117946	5B	214048313	214048627	0.0259321	gi|475544771|gb|EMT10390.1|	0	Putative transporter [Aegilops tauschii]
TCONS_00118045	5B	220116798	220117339	0.0251801	gi|339518935|gb|AEJ83861.1|	1.66e-157	X-ray repair cross-complementing 4 [Triticum aestivum]
TCONS_00118053	5B	220884864	220885259	0.00365561	gi|475603227|gb|EMT25349.1|	0	Lipoxygenase 2 [Aegilops tauschii]
TCONS_00118086	5B	221227686	221228157	0.00065551	gi|475619544|gb|EMT30807.1|	1.01e-157	hypothetical protein F775_10013 [Aegilops tauschii]
TCONS_00118134	5B	222541263	222541653	0.0164252	gi|475451381|gb|EMT01703.1|	1.41e-107	Vignain [Aegilops tauschii]
TCONS_00118161	5B	223979966	223980322	0.0247795	gi|326492085|dbj|BAJ98267.1|	3.72e-142	predicted protein, partial [Hordeum vulgare subsp. vulgare]
TCONS_00118246	5B	227623934	227626495	0.0414572	gi|326498453|dbj|BAJ98654.1|	0	predicted protein [Hordeum vulgare subsp. vulgare]
TCONS_00118387	5B	235930449	235930677	0.00242279	gi|474329342|gb|EMS62533.1|	1.35e-122	putative glutathione S-transferase GSTF1 [Triticum urartu]
TCONS_00118569	5B	245369464	245369757	0.00461007	gi|730129911|gb|AIZ11187.1|	0	phosphate transporter protein [Triticum aestivum]
TCONS_00118593	5B	246782820	246782955	0.0132863	gi|475618738|gb|EMT30518.1|	0	Putative beta-1,3-galactosyltransferase 18 [Aegilops tauschii]
TCONS_00118755	5B	255350330	255350514	0.0405153	gi|474386287|gb|EMS64969.1|	1.14e-67	hypothetical protein TRIUR3_04345 [Triticum urartu]
TCONS_00118807	5B	256059581	256062215	0.0166639	gi|326498577|dbj|BAJ98716.1|	4.37e-57	predicted protein [Hordeum vulgare subsp. vulgare]
TCONS_00118933	5B	261754923	261755583	0.0390025	gi|326497045|dbj|BAK02107.1|	2.24e-58	predicted protein [Hordeum vulgare subsp. vulgare]
TCONS_00119077	5B	265643203	265645107	0.0115387	gi|475553307|gb|EMT11963.1|	0	Putative receptor protein kinase ZmPK1 [Aegilops tauschii]
TCONS_00119198	5B	270748498	270748851	0.0224542	gi|357118039|ref|XP_003560767.1|	3.43e-134	PREDICTED: uncharacterized protein LOC100836408 [Brachypodium distachyon]
TCONS_00119347	5B	3872391	3873180	0.0162945	gi|474071387|gb|EMS54336.1|	0	hypothetical protein TRIUR3_25679 [Triticum urartu]
TCONS_00119418	5B	7024985	7026386	0.0149056	gi|326528349|dbj|BAJ93356.1|	4.99e-68	predicted protein [Hordeum vulgare subsp. vulgare]
TCONS_00119467	5B	12127722	12129030	0.0343093	gi|475536903|gb|EMT08989.1|	4.64e-58	hypothetical protein F775_29404 [Aegilops tauschii]
TCONS_00119542	5B	16993545	16995386	2.03e-05	gi|326512916|dbj|BAK03365.1|	2.31e-21	predicted protein [Hordeum vulgare subsp. vulgare]
TCONS_00119710	5B	25112048	25112617	0.00842471	gi|475613341|gb|EMT28745.1|	0	Alpha-(1,4)-fucosyltransferase [Aegilops tauschii]
TCONS_00119812	5B	32665595	32666124	0.0136729	gi|573912751|ref|XP_006644079.1|	0	PREDICTED: LOW QUALITY PROTEIN: protoporphyrinogen oxidase, chloroplastic-like [Oryza brachyantha]
TCONS_00120009	5B	44953535	44955272	0.0113141	gi|474202239|gb|EMS58562.1|	0	putative calcium-transporting ATPase 4, plasma membrane-type [Triticum urartu]
TCONS_00120221	5B	55714451	55715237	0.00423277	gi|475610924|gb|EMT27907.1|	3.49e-117	Lectin-domain containing receptor kinase A4.2 [Aegilops tauschii]
TCONS_00120723	5B	85390178	85390816	0.0343732	gi|357156836|ref|XP_003577592.1|	0	PREDICTED: uncharacterized protein LOC100828331 isoform X1 [Brachypodium distachyon]
TCONS_00120732	5B	86495864	86496224	0.0103812	gi|195611428|gb|ACG27544.1|	5.55e-81	peroxisomal membrane protein PMP22 [Zea mays]
TCONS_00120930	5B	101644670	101645990	0.00452087	gi|326503808|dbj|BAK02690.1|	1.43e-64	predicted protein [Hordeum vulgare subsp. vulgare]
TCONS_00120942	5B	102259534	102259956	0.0435977	gi|944054400|gb|KQJ90038.1|	0	hypothetical protein BRADI_4g29102 [Brachypodium distachyon]
TCONS_00121073	5B	108182505	108183401	0.00416292	gi|475611810|gb|EMT28219.1|	1.11e-36	hypothetical protein F775_25180 [Aegilops tauschii]
TCONS_00121289	5B	118787406	118787522	0.043273	gi|474443893|gb|EMS68531.1|	4.24e-158	hypothetical protein TRIUR3_26072 [Triticum urartu]
TCONS_00121353	5B	121717039	121718096	0.02548	gi|473838114|gb|EMS47252.1|	3.64e-28	hypothetical protein TRIUR3_13223 [Triticum urartu]
TCONS_00121568	5B	134252987	134255521	0.0393581	gi|326495058|dbj|BAJ85625.1|	0	predicted protein [Hordeum vulgare subsp. vulgare]
TCONS_00121644	5B	141326523	141332173	0.00358814	gi|326521062|dbj|BAJ96734.1|	6.97e-66	predicted protein [Hordeum vulgare subsp. vulgare]
TCONS_00121671	5B	142730237	142733487	0.0172159	gi|326494420|dbj|BAJ90479.1|	0	predicted protein [Hordeum vulgare subsp. vulgare]
TCONS_00121704	5B	146820788	146820883	0.014646	gi|326520952|dbj|BAJ92839.1|	4.88e-73	predicted protein [Hordeum vulgare subsp. vulgare]
TCONS_00121791	5B	152720067	152720942	0.0167935	gi|473997722|gb|EMS52112.1|	0	Elongation factor Ts [Triticum urartu]
TCONS_00121806	5B	153337966	153338875	0.00957057	gi|474384911|gb|EMS64867.1|	7.06e-78	hypothetical protein TRIUR3_17055 [Triticum urartu]
TCONS_00121900	5B	161044654	161045649	0.0441792	NA	NA	NA
TCONS_00121916	5B	161785940	161788160	0.0181264	gi|326492796|dbj|BAJ90254.1|	0	predicted protein [Hordeum vulgare subsp. vulgare]
TCONS_00121923	5B	162634390	162634835	0.0421651	gi|115479547|ref|NP_001063367.1|	0	Os09g0457400 [Oryza sativa Japonica Group]
TCONS_00121997	5B	167766405	167767232	0.022888	gi|475582080|gb|EMT19027.1|	2.89e-69	hypothetical protein F775_22530 [Aegilops tauschii]
TCONS_00122145	5B	175811975	175812843	0.019754	gi|326493128|dbj|BAJ85025.1|	1.04e-18	predicted protein, partial [Hordeum vulgare subsp. vulgare]
TCONS_00122203	5B	179493242	179493723	0.0171195	gi|326496517|dbj|BAJ94720.1|	9.39e-155	predicted protein [Hordeum vulgare subsp. vulgare]
TCONS_00122246	5B	181343237	181345959	0.00587302	gi|473799397|gb|EMS46566.1|	0	hypothetical protein TRIUR3_24883 [Triticum urartu]
TCONS_00122251	5B	181713215	181714098	0.0457865	gi|326533318|dbj|BAJ93631.1|	0	predicted protein, partial [Hordeum vulgare subsp. vulgare]
TCONS_00122302	5B	184135131	184135887	0.0141172	gi|474403002|gb|EMS66207.1|	0	hypothetical protein TRIUR3_15571 [Triticum urartu]
TCONS_00122351	5B	187945260	187946216	0.00288571	gi|474238784|gb|EMS59686.1|	8.62e-84	hypothetical protein TRIUR3_05532 [Triticum urartu]
TCONS_00122530	5B	198351062	198351867	0.0354342	gi|326488423|dbj|BAJ93880.1|	0	predicted protein [Hordeum vulgare subsp. vulgare]
TCONS_00122564	5B	200186381	200187671	0.0127838	gi|125558600|gb|EAZ04136.1|	2.36e-112	hypothetical protein OsI_26279 [Oryza sativa Indica Group]
TCONS_00122687	5B	207443957	207444926	0.0342618	gi|473887111|gb|EMS48212.1|	6.03e-19	Glutamyl-tRNA reductase 1, chloroplastic [Triticum urartu]
TCONS_00122763	5B	212149019	212149314	0.0270953	gi|326505836|dbj|BAJ91157.1|	1.01e-65	predicted protein [Hordeum vulgare subsp. vulgare]
TCONS_00122824	5B	215182885	215183402	0.00171814	gi|474124971|gb|EMS56187.1|	1.04e-178	hypothetical protein TRIUR3_02696 [Triticum urartu]
TCONS_00122875	5B	219024375	219027146	0.0142808	gi|475571142|gb|EMT16184.1|	0	Disease resistance protein RPM1 [Aegilops tauschii]
TCONS_00122900	5B	221779178	221780549	0.000420643	gi|475491853|gb|EMT03601.1|	0	Putative UDP-glucosyltransferase [Aegilops tauschii]
TCONS_00122946	5B	223590017	223590475	0.00644669	NA	NA	NA
TCONS_00122981	5B	224819636	224821010	0.00257406	gi|475600889|gb|EMT24676.1|	1e-87	hypothetical protein F775_16370 [Aegilops tauschii]
TCONS_00122989	5B	225007998	225008586	0.00807436	gi|1657855|gb|AAB18207.1|	3.21e-78	cold acclimation protein WCOR413 [Triticum aestivum]
TCONS_00123038	5B	226747716	226748372	0.01843	gi|475622375|gb|EMT31849.1|	0	hypothetical protein F775_09976 [Aegilops tauschii]
TCONS_00123072	5B	228851780	228852417	0.0377806	gi|475524206|gb|EMT06992.1|	0	NAC domain-containing protein 42 [Aegilops tauschii]
TCONS_00123188	5B	233652768	233654051	0.00937013	gi|475615820|gb|EMT29569.1|	1.56e-99	Transcription factor PIF5 [Aegilops tauschii]
TCONS_00123246	5B	236448878	236451717	0.0281347	gi|326488897|dbj|BAJ98060.1|	0	predicted protein [Hordeum vulgare subsp. vulgare]
TCONS_00123290	5B	238304219	238304780	0.0269888	gi|121489505|emb|CAJ56055.1|	1.13e-26	dehydrin 1 [Aegilops umbellulata]
TCONS_00123299	5B	238889532	238891786	0.00970477	gi|326498409|dbj|BAJ98632.1|	0	predicted protein, partial [Hordeum vulgare subsp. vulgare]
TCONS_00123312	5B	239345169	239346636	0.036968	gi|475619936|gb|EMT30928.1|	0	Wall-associated receptor kinase 5 [Aegilops tauschii]
TCONS_00123434	5B	246901007	246901429	0.00934532	gi|474304953|gb|EMS61719.1|	3.46e-12	RNA-binding protein Nova-1 [Triticum urartu]
TCONS_00123471	5B	249529830	249530158	0.00031867	gi|475518048|gb|EMT06162.1|	4e-101	hypothetical protein F775_06949 [Aegilops tauschii]
TCONS_00123502	5B	250480524	250481544	0.00480698	gi|326494206|dbj|BAJ90372.1|	2.74e-75	predicted protein [Hordeum vulgare subsp. vulgare]
TCONS_00123503	5B	250526588	250527470	0.0104186	gi|160415774|gb|ABX39195.1|	1.71e-49	C2H2 zinc finger protein [Triticum aestivum]
TCONS_00123616	5B	256040417	256043385	0.00359498	gi|474323868|gb|EMS62401.1|	1.16e-08	Ubiquitin carboxyl-terminal hydrolase 9 [Triticum urartu]
TCONS_00123680	5B	258375348	258377247	0.0285006	gi|393793776|emb|CCI55655.1|	0	putative NRT1/PTR-like transporter [Hordeum vulgare subsp. vulgare]
TCONS_00123710	5B	259552418	259553082	0.00836038	gi|474406075|gb|EMS66512.1|	2.72e-86	Transcription antitermination protein nusG [Triticum urartu]
TCONS_00123751	5B	260317820	260318262	0.0178862	gi|473953835|gb|EMS50828.1|	9.51e-46	hypothetical protein TRIUR3_04649 [Triticum urartu]
TCONS_00123799	5B	261972346	261972846	0.0284651	gi|28372670|gb|AAO39854.1|	1.17e-21	DnaJ-like protein [Oryza sativa Japonica Group]
TCONS_00124029	5B	269103045	269104090	0.0275182	gi|326531910|dbj|BAK01331.1|	3.46e-45	predicted protein [Hordeum vulgare subsp. vulgare]
TCONS_00124111	5B	271605023	271605676	0.00131109	NA	NA	NA
TCONS_00124129	5B	272597855	272597881	0.0472814	gi|944067871|gb|KQK03355.1|	5.22e-179	hypothetical protein BRADI_2g07310 [Brachypodium distachyon]
TCONS_00124389	5B	123588393	123589847	0.0461696	gi|474009318|gb|EMS52527.1|	5.41e-09	hypothetical protein TRIUR3_33060 [Triticum urartu]
TCONS_00124406	5B	134845145	134846574	2.65e-05	gi|326501382|dbj|BAK02480.1|	1.55e-135	predicted protein [Hordeum vulgare subsp. vulgare]
TCONS_00124509	5B	187941405	187943034	0.00344837	gi|944063246|gb|KQJ98836.1|	2.22e-66	hypothetical protein BRADI_3g39431 [Brachypodium distachyon]
TCONS_00124527	5B	195189000	195190744	0.00134809	gi|473968239|gb|EMS51332.1|	1.46e-176	Disease resistance protein RPP13 [Triticum urartu]
TCONS_00124556	5B	211273254	211273905	0.0372078	NA	NA	NA
TCONS_00124647	5B	245232838	245233816	0.0363176	gi|475554911|gb|EMT12330.1|	4.64e-129	Wall-associated receptor kinase 1 [Aegilops tauschii]
TR110636_c1_g2_i2	5B	15383534	15384786	0.00299372	gi|473803627|gb|EMS46632.1|	0	hypothetical protein TRIUR3_34561 [Triticum urartu]
TR119863_c0_g1_i1	5B	198353824	198356450	0.0376615	NA	NA	NA
TR119863_c0_g1_i2	5B	198353824	198356450	0.00428207	NA	NA	NA
TR124384_c0_g1_i4	5B	239264695	239271918	0.0171412	gi|326487195|dbj|BAJ89582.1|	5.46e-13	predicted protein [Hordeum vulgare subsp. vulgare]
TR133877_c0_g1_i4	5B	147877333	147878838	0.000773388	gi|475584387|gb|EMT19763.1|	1.47e-119	Putative inactive purple acid phosphatase 20 [Aegilops tauschii]
TR134935_c0_g1_i1	5B	198352181	198353667	0.0290107	NA	NA	NA
TR147739_c0_g1_i3	5B	40719676	40720682	0.00167915	gi|573963147|ref|XP_006663719.1|	1.81e-35	PREDICTED: PRA1 family protein B2-like [Oryza brachyantha]
TR149651_c0_g1_i2	5B	154693576	154694533	0.0355784	gi|944054701|gb|KQJ90339.1|	1.56e-130	hypothetical protein BRADI_4g30897 [Brachypodium distachyon]
TR149674_c2_g2_i1	5B	112693094	112695123	0.0150253	gi|473838741|gb|EMS47277.1|	0	putative WRKY transcription factor 41 [Triticum urartu]
TR149674_c2_g2_i4	5B	112693094	112695123	0.019827	gi|473838741|gb|EMS47277.1|	0	putative WRKY transcription factor 41 [Triticum urartu]
TR150478_c3_g1_i1	5B	226590901	226592502	0.0120503	gi|326515212|dbj|BAK03519.1|	0	predicted protein [Hordeum vulgare subsp. vulgare]
TR151256_c1_g2_i4	5B	206690183	206691154	0.0423857	gi|475614037|gb|EMT28961.1|	2.15e-97	hypothetical protein F775_22661 [Aegilops tauschii]
TR153460_c0_g1_i2	5B	244900410	244903434	0.00488924	gi|357125184|ref|XP_003564275.1|	0	PREDICTED: probable beta-1,3-galactosyltransferase 19 [Brachypodium distachyon]
TR154353_c0_g2_i3	5B	80442767	80445563	0.0425508	gi|326514526|dbj|BAJ96250.1|	1.64e-128	predicted protein [Hordeum vulgare subsp. vulgare]
TR154419_c4_g1_i6	5B	16645270	16646491	0.0150527	gi|514776941|ref|XP_004968591.1|	0	PREDICTED: peptide-N4-(N-acetyl-beta-glucosaminyl)asparagine amidase A-like [Setaria italica]
TR157547_c0_g1_i3	5B	117084277	117087787	0.0218493	gi|475622861|gb|EMT32002.1|	2.23e-175	Tetratricopeptide repeat protein 28 [Aegilops tauschii]
TR160181_c2_g2_i6	5B	181139473	181144484	0.0378448	gi|326529273|dbj|BAK01030.1|	0	predicted protein [Hordeum vulgare subsp. vulgare]
TR163532_c1_g1_i8	5B	238919281	238920425	0.0479482	gi|33465457|gb|AAP75621.1|	9.83e-154	syntaxin [Hordeum vulgare subsp. vulgare]
TR163626_c3_g1_i3	5B	248956252	248958026	0.0448851	gi|7619802|emb|CAB50787.2|	0	putative glyoxalase I, partial [Triticum aestivum]
TR164419_c7_g1_i5	5B	82439015	82440697	0.0120977	gi|326526177|dbj|BAJ93265.1|	1.98e-66	predicted protein [Hordeum vulgare subsp. vulgare]
TR164430_c0_g1_i1	5B	179951217	179952074	0.00223362	gi|944055254|gb|KQJ90892.1|	4.76e-174	hypothetical protein BRADI_4g34400 [Brachypodium distachyon]
TR168477_c0_g1_i1	5B	176866145	176868005	0.0388009	gi|326516188|dbj|BAJ88117.1|	4.45e-45	predicted protein [Hordeum vulgare subsp. vulgare]
TR169145_c0_g1_i1	5B	225483563	225485814	0.0129196	gi|354802072|gb|AER39766.1|	1.72e-79	CYP81A20-4 [Festuca rubra subsp. commutata]
TR170494_c1_g3_i8	5B	187736711	187738545	0.000792535	gi|475512383|gb|EMT05491.1|	6.65e-92	60S ribosomal protein L32-1 [Aegilops tauschii]
TR170702_c0_g1_i5	5B	157305578	157309438	0.00878177	gi|475607306|gb|EMT26667.1|	2.55e-174	Beta-1,3-galactosyltransferase 7 [Aegilops tauschii]
TR171611_c0_g1_i1	5B	260739898	260742717	0.0214207	gi|944076969|gb|KQK12321.1|	1.21e-152	hypothetical protein BRADI_1g02920 [Brachypodium distachyon]
TR171627_c1_g1_i1	5B	38423198	38424424	0.0417101	gi|326506716|dbj|BAJ91399.1|	0	predicted protein [Hordeum vulgare subsp. vulgare]
TR172003_c1_g1_i2	5B	224819636	224821010	0.00763387	gi|475600889|gb|EMT24676.1|	4.82e-83	hypothetical protein F775_16370 [Aegilops tauschii]
TR178730_c0_g1_i1	5B	125478381	125481206	0.0239667	gi|326499672|dbj|BAJ86147.1|	1.01e-157	predicted protein [Hordeum vulgare subsp. vulgare]
TR182451_c2_g1_i1	5B	221779178	221781182	0.000205059	gi|573926164|ref|XP_006650616.1|	6.64e-81	PREDICTED: UDP-glycosyltransferase 83A1-like [Oryza brachyantha]
TR183062_c0_g1_i7	5B	170563162	170564690	0.0290664	gi|573958172|ref|XP_006661294.1|	3.75e-21	PREDICTED: homeobox-leucine zipper protein HOX11-like [Oryza brachyantha]
TR183555_c0_g1_i2	5B	106995988	106997639	0.025109	gi|475585307|gb|EMT20029.1|	8.56e-178	Protein ODORANT1 [Aegilops tauschii]
TR183557_c0_g1_i1	5B	101188113	101189574	0.0328186	gi|326532892|dbj|BAJ89291.1|	2.61e-100	predicted protein [Hordeum vulgare subsp. vulgare]
TR183713_c0_g1_i2	5B	85564061	85566376	0.0045142	gi|326492189|dbj|BAJ98319.1|	0	predicted protein [Hordeum vulgare subsp. vulgare]
TR184152_c3_g1_i4	5B	225530222	225531464	0.0123104	gi|475590354|gb|EMT21445.1|	6.67e-138	Chitinase 8 [Aegilops tauschii]
TR184187_c10_g2_i1	5B	266877471	266878223	0.0294334	gi|475465625|gb|EMT02189.1|	3.08e-55	hypothetical protein F775_43511 [Aegilops tauschii]
TR186548_c0_g1_i4	5B	94694929	94696524	0.0198699	gi|475627129|gb|EMT33578.1|	0	hypothetical protein F775_52187 [Aegilops tauschii]
TR188162_c0_g1_i1	5B	225813080	225816287	0.0117467	gi|326500176|dbj|BAJ90922.1|	0	predicted protein [Hordeum vulgare subsp. vulgare]
TR189161_c0_g1_i8	5B	153908935	153912059	0.0112553	gi|475579477|gb|EMT18352.1|	0	LRR receptor-like serine/threonine-protein kinase EFR [Aegilops tauschii]
TR189474_c0_g1_i6	5B	102259924	102262644	0.039818	gi|944054400|gb|KQJ90038.1|	2.43e-180	hypothetical protein BRADI_4g29102 [Brachypodium distachyon]
TR189694_c0_g1_i2	5B	215288093	215290132	0.00635475	gi|474384900|gb|EMS64861.1|	5.61e-26	CBL-interacting protein kinase 7 [Triticum urartu]
TR189947_c0_g1_i1	5B	216414805	216415356	0.0432754	gi|514815184|ref|XP_004982353.1|	2.13e-114	PREDICTED: F-box/LRR-repeat protein At3g48880-like [Setaria italica]
TR191560_c0_g1_i1	5B	188111311	188111488	0.00177535	gi|475567976|gb|EMT15384.1|	0	Cytochrome P450 71D7 [Aegilops tauschii]
TR192154_c1_g2_i7	5B	255664513	255666930	0.0316338	gi|326498123|dbj|BAJ94924.1|	0	predicted protein, partial [Hordeum vulgare subsp. vulgare]
TR192154_c1_g2_i8	5B	255664513	255666930	0.016587	gi|326498123|dbj|BAJ94924.1|	1.51e-162	predicted protein, partial [Hordeum vulgare subsp. vulgare]
TR192246_c1_g1_i1	5B	174666329	174666906	0.00946325	gi|944054708|gb|KQJ90346.1|	8.34e-100	hypothetical protein BRADI_4g30950 [Brachypodium distachyon]
TR192261_c0_g1_i2	5B	137580848	137585111	0.0305721	gi|326487996|dbj|BAJ89837.1|	0	predicted protein [Hordeum vulgare subsp. vulgare]
TR192425_c1_g1_i1	5B	70473076	70476473	0.0314456	gi|357152250|ref|XP_003576058.1|	7.44e-56	PREDICTED: zinc finger CCCH domain-containing protein 19-like [Brachypodium distachyon]
TR195161_c0_g1_i1	5B	118787406	118790814	0.0294408	gi|474443893|gb|EMS68531.1|	3.4e-167	hypothetical protein TRIUR3_26072 [Triticum urartu]
TR195928_c0_g1_i4	5B	255080919	255082000	0.000601605	gi|326508434|dbj|BAJ99484.1|	8.3e-171	predicted protein [Hordeum vulgare subsp. vulgare]
TR196519_c1_g1_i4	5B	210479988	210484015	0.0241206	gi|326495958|dbj|BAJ90601.1|	5.72e-33	predicted protein [Hordeum vulgare subsp. vulgare]
TR197687_c1_g2_i6	5B	28281041	28283422	0.0052231	gi|326501382|dbj|BAK02480.1|	0	predicted protein [Hordeum vulgare subsp. vulgare]
TR197687_c1_g2_i9	5B	28281041	28283422	0.0327352	gi|473895729|gb|EMS48964.1|	0	hypothetical protein TRIUR3_23268 [Triticum urartu]
TR198883_c0_g3_i1	5B	209669636	209671819	0.00304958	gi|475481341|gb|EMT02880.1|	2.22e-160	hypothetical protein F775_08276 [Aegilops tauschii]
TR202298_c2_g2_i8	5B	55727100	55729508	0.00906259	gi|475610928|gb|EMT27911.1|	0	Cysteine-rich receptor-like protein kinase 25 [Aegilops tauschii]
TR204403_c0_g1_i1	5B	259749714	259753690	0.0121264	gi|475591000|gb|EMT21623.1|	0	Anthranilate synthase component I-1, chloroplastic [Aegilops tauschii]
TR204834_c4_g1_i2	5B	245369464	245373099	0.0154377	gi|730129911|gb|AIZ11187.1|	0	phosphate transporter protein [Triticum aestivum]
TR206800_c0_g1_i1	5B	151744118	151746767	0.0300719	gi|326525669|dbj|BAJ88881.1|	1.86e-74	predicted protein [Hordeum vulgare subsp. vulgare]
TR206952_c2_g1_i1	5B	111096896	111099253	0.0419382	gi|474340232|gb|EMS62640.1|	0	hypothetical protein TRIUR3_18082 [Triticum urartu]
TR207070_c3_g2_i1	5B	206547811	206548048	0.000931744	gi|326515744|dbj|BAK07118.1|	8.81e-24	predicted protein [Hordeum vulgare subsp. vulgare]
TR207070_c3_g2_i10	5B	206547811	206548048	0.0469509	gi|326515744|dbj|BAK07118.1|	1.43e-29	predicted protein [Hordeum vulgare subsp. vulgare]
TR208971_c1_g1_i10	5B	112791068	112792919	0.0401666	gi|326530984|dbj|BAK04843.1|	0	predicted protein [Hordeum vulgare subsp. vulgare]
TR209884_c0_g1_i3	5B	204706591	204708253	0.0139278	gi|475625968|gb|EMT33145.1|	9.72e-73	Acyl carrier protein 2, chloroplastic [Aegilops tauschii]
TR211434_c0_g1_i2	5B	48531425	48533195	0.00694865	gi|475582308|gb|EMT19088.1|	3.18e-23	hypothetical protein F775_26745 [Aegilops tauschii]
TR214304_c0_g1_i3	5B	27583284	27585172	0.0186697	gi|326511747|dbj|BAJ92018.1|	0	predicted protein [Hordeum vulgare subsp. vulgare]
TR216924_c2_g4_i1	5B	224147976	224148957	0.0194776	gi|326528937|dbj|BAJ97490.1|	0	predicted protein [Hordeum vulgare subsp. vulgare]
TR216924_c2_g4_i2	5B	224147976	224148957	0.0130864	gi|326528937|dbj|BAJ97490.1|	0	predicted protein [Hordeum vulgare subsp. vulgare]
TR217078_c0_g3_i5	5B	261885406	261886332	0.00102503	gi|475626756|gb|EMT33463.1|	2.7e-58	hypothetical protein F775_29891 [Aegilops tauschii]
TR219446_c1_g1_i1	5B	63551624	63553528	0.0133514	gi|326523175|dbj|BAJ88628.1|	0	predicted protein [Hordeum vulgare subsp. vulgare]
TR221061_c0_g2_i3	5B	187945260	187946216	0.00399432	gi|474238784|gb|EMS59686.1|	3.8e-66	hypothetical protein TRIUR3_05532 [Triticum urartu]
TR222392_c1_g1_i4	5B	261972346	261974896	0.0324872	NA	NA	NA
TR222916_c0_g1_i7	5B	263780736	263786513	0.00512959	gi|475580540|gb|EMT18628.1|	0	Translocase of chloroplast 159, chloroplastic [Aegilops tauschii]
TR225863_c1_g1_i6	5B	251127121	251129970	0.00819841	gi|475553687|gb|EMT12068.1|	1.93e-102	hypothetical protein F775_26567 [Aegilops tauschii]
TR226243_c2_g1_i9	5B	203028013	203031275	0.0342169	gi|475601831|gb|EMT24949.1|	0	hypothetical protein F775_14507 [Aegilops tauschii]
TR227124_c1_g1_i1	5B	168638946	168641738	0.012017	gi|475521626|gb|EMT06657.1|	0	Pentatricopeptide repeat-containing protein [Aegilops tauschii]
TR228087_c4_g2_i4	5B	203138084	203141719	0.0328221	gi|475573999|gb|EMT16871.1|	1.76e-168	Receptor-like protein kinase FERONIA [Aegilops tauschii]
TR228500_c0_g1_i1	5B	251280993	251283340	0.0151695	gi|326519136|dbj|BAJ96567.1|	0	predicted protein [Hordeum vulgare subsp. vulgare]
TR228500_c0_g4_i4	5B	251280993	251283340	0.027336	gi|475618738|gb|EMT30518.1|	7.19e-177	Putative beta-1,3-galactosyltransferase 18 [Aegilops tauschii]
TR230122_c0_g1_i10	5B	179493242	179495106	0.0345013	gi|475512382|gb|EMT05490.1|	1.42e-172	Transcription factor bHLH49 [Aegilops tauschii]
TR230278_c1_g2_i4	5B	248443593	248447620	0.0452946	gi|326511393|dbj|BAJ87710.1|	0	predicted protein [Hordeum vulgare subsp. vulgare]
TR231481_c0_g1_i9	5B	231435710	231438987	0.0409237	gi|721627220|ref|XP_003558618.2|	0	PREDICTED: uncharacterized protein LOC100846034 [Brachypodium distachyon]
TR231511_c0_g1_i1	5B	126947679	126950197	0.000704978	gi|326492722|dbj|BAJ90217.1|	0	predicted protein [Hordeum vulgare subsp. vulgare]
TR231520_c2_g2_i2	5B	236448878	236452933	0.0424938	gi|473864903|gb|EMS47593.1|	1.05e-154	Glucan endo-1,3-beta-glucosidase 8 [Triticum urartu]
TR232227_c0_g1_i1	5B	261182083	261183053	0.00493918	gi|721658091|ref|XP_010234612.1|	8.17e-150	PREDICTED: uncharacterized protein LOC104583613 [Brachypodium distachyon]
TR233750_c0_g2_i1	5B	230491239	230491873	0.000280554	gi|326501396|dbj|BAK02487.1|	0	predicted protein [Hordeum vulgare subsp. vulgare]
TR233797_c0_g1_i2	5B	70949606	70950840	0.0134958	gi|475569383|gb|EMT15746.1|	2.53e-95	Zinc finger protein 7 [Aegilops tauschii]
TR234777_c1_g1_i1	5B	3872998	3876511	0.00897692	gi|474071387|gb|EMS54336.1|	6.85e-148	hypothetical protein TRIUR3_25679 [Triticum urartu]
TR235673_c2_g1_i2	5B	158297560	158303560	0.0217497	gi|326526859|dbj|BAK00818.1|	0	predicted protein [Hordeum vulgare subsp. vulgare]
TR235832_c2_g1_i2	5B	212149739	212152126	0.011717	gi|326505836|dbj|BAJ91157.1|	8.71e-66	predicted protein [Hordeum vulgare subsp. vulgare]
TR236805_c0_g1_i2	5B	215566625	215569131	0.0253286	gi|357160347|ref|XP_003578737.1|	1.32e-97	PREDICTED: protein Iojap-related, mitochondrial [Brachypodium distachyon]
TR238117_c6_g11_i5	5B	183677960	183680097	0.00335232	gi|475603436|gb|EMT25427.1|	1.49e-33	hypothetical protein F775_31558 [Aegilops tauschii]
TR238535_c0_g3_i1	5B	155854526	155856661	0.000360474	gi|473780706|gb|EMS46054.1|	5.96e-09	hypothetical protein TRIUR3_18113 [Triticum urartu]
TR65198_c0_g1_i1	5B	2734939	2736639	0.00384896	gi|242076066|ref|XP_002447969.1|	1.05e-62	hypothetical protein SORBIDRAFT_06g019050 [Sorghum bicolor]
TR82548_c0_g1_i5	5B	51494167	51495285	0.0359059	gi|326508082|dbj|BAJ86784.1|	1.46e-160	predicted protein [Hordeum vulgare subsp. vulgare]
TR92797_c2_g1_i1	5B	267530506	267531093	0.0120091	NA	NA	NA
TR95610_c0_g1_i1	5B	159677311	159681542	0.0310211	gi|475564964|gb|EMT14662.1|	3.46e-67	Bifunctional dihydroflavonol 4-reductase/flavanone 4-reductase [Aegilops tauschii]
TR95610_c0_g1_i3	5B	159677311	159681542	0.00556357	gi|475564964|gb|EMT14662.1|	9.19e-66	Bifunctional dihydroflavonol 4-reductase/flavanone 4-reductase [Aegilops tauschii]
TR99952_c0_g1_i1	5B	254824991	254825640	0.000217249	gi|475558830|gb|EMT13184.1|	4.8e-24	hypothetical protein F775_03172 [Aegilops tauschii]
TCONS_00124819	5D	2721589	2721820	0.0076283	gi|475515292|gb|EMT05824.1|	3.33e-44	hypothetical protein F775_06805 [Aegilops tauschii]
TCONS_00124871	5D	4871812	4872271	0.00274736	NA	NA	NA
TCONS_00124940	5D	8844630	8844659	0.0473288	gi|475508482|gb|EMT05090.1|	1.16e-17	hypothetical protein F775_42355 [Aegilops tauschii]
TCONS_00124963	5D	10403188	10403236	0.00864159	gi|475390840|gb|EMT00716.1|	2.67e-61	Protein FAR-RED ELONGATED HYPOCOTYL 3 [Aegilops tauschii]
TCONS_00125123	5D	16766456	16766720	0.0396199	gi|326521920|dbj|BAK04088.1|	5.93e-109	predicted protein [Hordeum vulgare subsp. vulgare]
TCONS_00125300	5D	23995489	23998302	0.00787975	gi|326513864|dbj|BAJ87950.1|	4.39e-108	predicted protein [Hordeum vulgare subsp. vulgare]
TCONS_00125386	5D	29027705	29028174	0.0274201	gi|473838741|gb|EMS47277.1|	1.34e-118	putative WRKY transcription factor 41 [Triticum urartu]
TCONS_00125387	5D	29027705	29028174	0.0168396	gi|473838741|gb|EMS47277.1|	0	putative WRKY transcription factor 41 [Triticum urartu]
TCONS_00125566	5D	39304053	39304347	0.00984664	gi|326527739|dbj|BAK08144.1|	0	predicted protein [Hordeum vulgare subsp. vulgare]
TCONS_00125615	5D	41875074	41875230	0.0237056	NA	NA	NA
TCONS_00125625	5D	42337843	42338033	0.028636	gi|326503600|dbj|BAJ86306.1|	0	predicted protein [Hordeum vulgare subsp. vulgare]
TCONS_00125674	5D	43010694	43012690	0.0497652	gi|475529115|gb|EMT07727.1|	5.75e-84	hypothetical protein F775_28258 [Aegilops tauschii]
TCONS_00125783	5D	47739397	47739785	0.0426885	gi|119388721|gb|ABL74257.1|	0	alcohol dehydrogenase ADH2H [Triticum aestivum]
TCONS_00125790	5D	48358666	48358787	5.06e-08	gi|475590723|gb|EMT21551.1|	6.02e-166	Putative WRKY transcription factor 40 [Aegilops tauschii]
TCONS_00125839	5D	50092216	50092253	0.0472536	gi|475588573|gb|EMT20908.1|	2.93e-101	hypothetical protein F775_07236 [Aegilops tauschii]
TCONS_00125922	5D	55886619	55888263	0.0499127	gi|475570729|gb|EMT16096.1|	0	Tryptophanyl-tRNA synthetase, cytoplasmic [Aegilops tauschii]
TCONS_00125966	5D	58666520	58667660	0.00320981	gi|474169630|gb|EMS57533.1|	2.92e-52	putative calcium-binding protein CML36 [Triticum urartu]
TCONS_00125986	5D	59326269	59326498	0.0285469	gi|326526175|dbj|BAJ93264.1|	1.42e-168	predicted protein [Hordeum vulgare subsp. vulgare]
TCONS_00126250	5D	69943556	69945544	0.00596377	gi|475454172|gb|EMT01785.1|	1.69e-178	Flavonoid 3&apos;-monooxygenase [Aegilops tauschii]
TCONS_00126314	5D	73714624	73715093	0.0406524	gi|326490325|dbj|BAJ84826.1|	0	predicted protein [Hordeum vulgare subsp. vulgare]
TCONS_00126431	5D	77979382	77979486	0.0332418	gi|208293677|gb|ACI25443.1|	0	hypersensitive induced response protein 3 [Triticum aestivum]
TCONS_00126579	5D	83142446	83142595	0.0299381	gi|474413222|gb|EMS66984.1|	3.86e-149	Proactivator polypeptide [Triticum urartu]
TCONS_00126759	5D	93575329	93575710	0.0279931	gi|326493196|dbj|BAJ85059.1|	0	predicted protein [Hordeum vulgare subsp. vulgare]
TCONS_00126829	5D	95901953	95902266	0.0363645	gi|944068936|gb|KQK04420.1|	2.91e-25	hypothetical protein BRADI_2g13422 [Brachypodium distachyon]
TCONS_00127001	5D	105458549	105458654	0.0284877	gi|475512383|gb|EMT05491.1|	2.53e-90	60S ribosomal protein L32-1 [Aegilops tauschii]
TCONS_00127014	5D	106003317	106004267	0.000775	gi|473933913|gb|EMS50093.1|	4.91e-67	60S ribosomal protein L32-1 [Triticum urartu]
TCONS_00127067	5D	107286896	107287056	0.000770069	gi|475609577|gb|EMT27424.1|	6.02e-173	Putative inactive purple acid phosphatase 27 [Aegilops tauschii]
TCONS_00127097	5D	108328345	108329038	0.0185553	gi|944055254|gb|KQJ90892.1|	7.2e-86	hypothetical protein BRADI_4g34400 [Brachypodium distachyon]
TCONS_00127216	5D	111690007	111690449	0.04145	gi|475545151|gb|EMT10448.1|	3.87e-111	hypothetical protein F775_06760 [Aegilops tauschii]
TCONS_00127249	5D	112880801	112882137	0.0149363	gi|475622928|gb|EMT32030.1|	2.51e-88	Putative serine/threonine-protein kinase NAK [Aegilops tauschii]
TCONS_00127250	5D	112880801	112882137	0.0169546	gi|475622928|gb|EMT32030.1|	0	Putative serine/threonine-protein kinase NAK [Aegilops tauschii]
TCONS_00127392	5D	118160592	118161414	0.000878159	gi|475500161|gb|EMT04235.1|	0	hypothetical protein F775_13469 [Aegilops tauschii]
TCONS_00127451	5D	119653639	119653827	0.0245601	gi|357159449|ref|XP_003578450.1|	0	PREDICTED: probable 1-acylglycerol-3-phosphate O-acyltransferase isoform X1 [Brachypodium distachyon]
TCONS_00127613	5D	124414077	124414475	0.0100698	gi|326499818|dbj|BAJ90744.1|	3.23e-122	predicted protein [Hordeum vulgare subsp. vulgare]
TCONS_00127640	5D	124781134	124782188	0.0464112	gi|474379703|gb|EMS64470.1|	0	GPI mannosyltransferase 1 [Triticum urartu]
TCONS_00127649	5D	125243014	125243155	0.0185826	gi|475481315|gb|EMT02877.1|	0	Wall-associated receptor kinase 3 [Aegilops tauschii]
TCONS_00128011	5D	134668732	134670149	0.0162523	gi|326510919|dbj|BAJ91807.1|	5.92e-137	predicted protein [Hordeum vulgare subsp. vulgare]
TCONS_00128017	5D	134868858	134869301	0.0225955	gi|475538871|gb|EMT09318.1|	1.55e-88	Pentatricopeptide repeat-containing protein [Aegilops tauschii]
TCONS_00128097	5D	137020669	137020814	0.00803632	gi|475593080|gb|EMT22267.1|	0	hypothetical protein F775_30192 [Aegilops tauschii]
TCONS_00128212	5D	139341405	139341569	0.0343171	gi|475483173|gb|EMT03027.1|	3.87e-94	40S ribosomal protein S18 [Aegilops tauschii]
TCONS_00128261	5D	141257793	141257876	0.0422807	gi|474147702|gb|EMS56848.1|	0	Lysyl-tRNA synthetase [Triticum urartu]
TCONS_00128279	5D	141655879	141656143	0.029418	gi|475618738|gb|EMT30518.1|	2.51e-139	Putative beta-1,3-galactosyltransferase 18 [Aegilops tauschii]
TCONS_00128280	5D	141655879	141656143	0.0359594	gi|475618738|gb|EMT30518.1|	0	Putative beta-1,3-galactosyltransferase 18 [Aegilops tauschii]
TCONS_00128397	5D	147361787	147366878	0.0216456	gi|475605349|gb|EMT26035.1|	6.92e-09	hypothetical protein F775_24761 [Aegilops tauschii]
TCONS_00128809	5D	158716733	158717569	0.029662	gi|475589522|gb|EMT21185.1|	9.73e-119	hypothetical protein F775_42795 [Aegilops tauschii]
TCONS_00128885	5D	161007054	161007297	0.00206293	gi|475623664|gb|EMT32317.1|	8.22e-137	Putative LRR receptor-like serine/threonine-protein kinase [Aegilops tauschii]
TCONS_00128911	5D	306631	306650	0.0385082	gi|326495204|dbj|BAJ85698.1|	0	predicted protein [Hordeum vulgare subsp. vulgare]
TCONS_00129163	5D	10503237	10504290	0.0364134	gi|326512182|dbj|BAJ96072.1|	2.63e-107	predicted protein [Hordeum vulgare subsp. vulgare]
TCONS_00129172	5D	10857851	10858441	0.0305575	gi|357154897|ref|XP_003576938.1|	0	PREDICTED: nucleolar complex protein 2 homolog [Brachypodium distachyon]
TCONS_00129324	5D	20341618	20344594	0.0464413	gi|721644199|ref|XP_010232274.1|	0	PREDICTED: UDP-glycosyltransferase 88A1-like [Brachypodium distachyon]
TCONS_00129386	5D	23429220	23429631	0.0467087	gi|475578421|gb|EMT18093.1|	3.71e-37	hypothetical protein F775_31113 [Aegilops tauschii]
TCONS_00129394	5D	24562855	24565322	0.00950882	gi|326495058|dbj|BAJ85625.1|	0	predicted protein [Hordeum vulgare subsp. vulgare]
TCONS_00129606	5D	36939789	36940520	0.0473521	gi|475610924|gb|EMT27907.1|	0	Lectin-domain containing receptor kinase A4.2 [Aegilops tauschii]
TCONS_00129631	5D	38488967	38489246	0.0416513	gi|473809039|gb|EMS46787.1|	5.49e-113	L-type lectin-domain containing receptor kinase IX.1 [Triticum urartu]
TCONS_00129698	5D	41246993	41247417	0.0183761	gi|721673492|ref|XP_003575471.2|	0	PREDICTED: uncharacterized protein LOC100840844 [Brachypodium distachyon]
TCONS_00129841	5D	46710790	46711775	0.00485656	gi|326489163|dbj|BAK01565.1|	9.26e-103	predicted protein [Hordeum vulgare subsp. vulgare]
TCONS_00129932	5D	50268878	50269298	0.00520909	gi|326509753|dbj|BAJ87092.1|	2.97e-66	predicted protein [Hordeum vulgare subsp. vulgare]
TCONS_00130036	5D	57392119	57394289	0.0432636	NA	NA	NA
TCONS_00130197	5D	63332931	63333063	0.0452899	gi|475584024|gb|EMT19650.1|	2.92e-94	hypothetical protein F775_06862 [Aegilops tauschii]
TCONS_00130279	5D	67396425	67397239	1.03e-59	gi|326505326|dbj|BAK03050.1|	0	predicted protein [Hordeum vulgare subsp. vulgare]
TCONS_00130383	5D	71401562	71401940	0.00500356	gi|475344302|gb|EMT00382.1|	2.94e-124	Transcription initiation factor TFIID subunit 13 [Aegilops tauschii]
TCONS_00130477	5D	75338012	75338604	0.0458565	gi|473841277|gb|EMS47289.1|	0	hypothetical protein TRIUR3_16891 [Triticum urartu]
TCONS_00130614	5D	80144720	80146302	1.05e-59	gi|474118992|gb|EMS55941.1|	0	hypothetical protein TRIUR3_23053 [Triticum urartu]
TCONS_00130633	5D	81018869	81019888	0.0242524	gi|475494428|gb|EMT03760.1|	0	hypothetical protein F775_08651 [Aegilops tauschii]
TCONS_00130794	5D	87068848	87069517	0.0166739	gi|473997722|gb|EMS52112.1|	0	Elongation factor Ts [Triticum urartu]
TCONS_00130938	5D	93969386	93970190	0.000806743	gi|475602971|gb|EMT25277.1|	0	Histone-lysine N-methyltransferase, H3 lysine-9 specific SUVH6 [Aegilops tauschii]
TCONS_00131102	5D	101688924	101690304	4.18e-09	gi|475575196|gb|EMT17200.1|	0	Wall-associated receptor kinase 3 [Aegilops tauschii]
TCONS_00131273	5D	107517030	107517133	0.00874875	gi|670424322|ref|XP_008652881.1|	0	PREDICTED: calcium-transporting ATPase 9, plasma membrane-type-like isoform X1 [Zea mays]
TCONS_00131284	5D	108191210	108191775	7.97e-05	gi|475582332|gb|EMT19104.1|	4.52e-12	hypothetical protein F775_09183 [Aegilops tauschii]
TCONS_00131408	5D	111837054	111837985	0.0054069	gi|721674249|ref|XP_010237285.1|	0	PREDICTED: uncharacterized protein LOC100845718 isoform X2 [Brachypodium distachyon]
TCONS_00131418	5D	111837054	111837985	0.00153161	gi|474122337|gb|EMS56098.1|	4.03e-169	Tyrosine-protein kinase BAZ1B [Triticum urartu]
TCONS_00131535	5D	115218525	115219101	0.0168336	gi|117653933|gb|ABK55382.1|	3.11e-137	CBFIVc-14.3 [Triticum aestivum]
TCONS_00131543	5D	115487875	115488160	0.0219224	gi|326517862|dbj|BAK07183.1|	0	predicted protein [Hordeum vulgare subsp. vulgare]
TCONS_00131667	5D	121936815	121937327	0.0251172	gi|669029792|emb|CDM84117.1|	4.08e-54	unnamed protein product [Triticum aestivum]
TCONS_00131673	5D	122195263	122195821	0.0290327	gi|326509379|dbj|BAJ91606.1|	0	predicted protein [Hordeum vulgare subsp. vulgare]
TCONS_00131807	5D	128094180	128094741	0.0113249	gi|473949238|gb|EMS50647.1|	1.35e-21	hypothetical protein TRIUR3_17919 [Triticum urartu]
TCONS_00131850	5D	128791723	128791973	0.028307	gi|474370382|gb|EMS63808.1|	3.08e-153	Transcription factor bHLH92 [Triticum urartu]
TCONS_00131852	5D	128809290	128809696	0.00882348	gi|475571142|gb|EMT16184.1|	0	Disease resistance protein RPM1 [Aegilops tauschii]
TCONS_00131896	5D	130335339	130337463	0.0147984	gi|475592100|gb|EMT21988.1|	1.14e-123	Putative WRKY transcription factor 57 [Aegilops tauschii]
TCONS_00131984	5D	132886141	132886373	0.0117335	gi|326511082|dbj|BAJ91888.1|	0	predicted protein [Hordeum vulgare subsp. vulgare]
TCONS_00132131	5D	137171530	137172555	0.0163928	gi|387864661|gb|AFK09767.1|	3.53e-51	drought and salt tolerance protein [Triticum aestivum]
TCONS_00132137	5D	137310076	137310253	0.021142	gi|1181296|emb|CAA55194.1|	1.77e-23	dehydrin [Triticum turgidum subsp. durum]
TCONS_00132345	5D	143046380	143046926	0.0281167	gi|548603|sp|P36213.1|PSAD_HORVU	2.67e-37	RecName: Full=Photosystem I reaction center subunit II, chloroplastic; AltName: Full=Photosystem I 20 kDa subunit; Short=PSI-D; Flags: Precursor
TCONS_00132366	5D	143688814	143691350	0.048421	gi|357155854|ref|XP_003577260.1|	1.68e-157	PREDICTED: putative serine/threonine-protein kinase-like protein CCR3 [Brachypodium distachyon]
TCONS_00132386	5D	144610073	144612080	0.0376615	gi|730129901|gb|AIZ11182.1|	0	phosphate transporter protein [Triticum aestivum]
TCONS_00132419	5D	146204664	146207223	0.022054	gi|475591756|gb|EMT21877.1|	0	Lectin-domain containing receptor kinase A4.3 [Aegilops tauschii]
TCONS_00132471	5D	147820088	147821142	0.0100524	gi|475558830|gb|EMT13184.1|	3.79e-28	hypothetical protein F775_03172 [Aegilops tauschii]
TCONS_00132532	5D	149870263	149870518	0.0075925	gi|326515096|dbj|BAK03461.1|	1.08e-91	predicted protein [Hordeum vulgare subsp. vulgare]
TCONS_00132587	5D	151749230	151750170	0.0160468	gi|475604153|gb|EMT25656.1|	5.78e-58	hypothetical protein F775_15812 [Aegilops tauschii]
TCONS_00132609	5D	152189535	152190101	0.0205375	gi|475623681|gb|EMT32326.1|	3.8e-50	Glycine-rich RNA-binding protein [Aegilops tauschii]
TCONS_00132733	5D	155405416	155405913	0.028527	gi|226508024|ref|NP_001141036.1|	2.56e-94	uncharacterized protein LOC100273115 [Zea mays]
TCONS_00132739	5D	155626829	155627289	0.0147993	gi|475569598|gb|EMT15820.1|	0	Disease resistance protein RPM1 [Aegilops tauschii]
TCONS_00132972	5D	161273615	161274084	0.00847648	gi|326531644|dbj|BAJ97826.1|	7.43e-74	predicted protein [Hordeum vulgare subsp. vulgare]
TCONS_00133050	5D	15773358	15774494	0.0490019	gi|475583723|gb|EMT19550.1|	0	hypothetical protein F775_21606 [Aegilops tauschii]
TCONS_00133077	5D	21870141	21871088	0.00608943	gi|736543793|gb|AJA71626.1|	1.32e-48	male sterility protein [Triticum aestivum]
TCONS_00133151	5D	44561711	44566852	0.0460376	gi|475607304|gb|EMT26665.1|	6.25e-13	hypothetical protein F775_06705 [Aegilops tauschii]
TCONS_00133155	5D	46082064	46084884	0.0221633	gi|474373380|gb|EMS63986.1|	1.09e-50	hypothetical protein TRIUR3_12046 [Triticum urartu]
TCONS_00133232	5D	72130153	72131186	0.0168336	NA	NA	NA
TCONS_00133251	5D	80513188	80514712	1.03e-59	gi|242067327|ref|XP_002448940.1|	1.21e-25	hypothetical protein SORBIDRAFT_05g002035, partial [Sorghum bicolor]
TCONS_00133264	5D	87065830	87066217	0.049014	NA	NA	NA
TCONS_00133276	5D	93362733	93364220	0.00439497	gi|474060695|gb|EMS53987.1|	5.35e-24	hypothetical protein TRIUR3_22946 [Triticum urartu]
TCONS_00133279	5D	95154484	95155162	0.0489858	gi|475592272|gb|EMT22028.1|	2.11e-09	Cysteine-rich receptor-like protein kinase 41 [Aegilops tauschii]
TCONS_00133342	5D	113827855	113828732	0.000569737	gi|474259600|gb|EMS60498.1|	4.42e-21	hypothetical protein TRIUR3_03964 [Triticum urartu]
TCONS_00133426	5D	131825058	131826035	0.00252933	gi|475491853|gb|EMT03601.1|	1.98e-99	Putative UDP-glucosyltransferase [Aegilops tauschii]
TCONS_00133491	5D	148292717	148293778	0.00223234	gi|475607537|gb|EMT26744.1|	6.46e-67	hypothetical protein F775_02554 [Aegilops tauschii]
TCONS_00133495	5D	148851422	148853619	0.0476625	gi|475525267|gb|EMT07131.1|	0	Lectin-domain containing receptor kinase A4.3 [Aegilops tauschii]
TCONS_00133549	5D	159205769	159206291	3.84e-59	gi|721687273|ref|XP_010239199.1|	1.16e-16	PREDICTED: uncharacterized protein LOC100831159 [Brachypodium distachyon]
TR107632_c0_g2_i1	5D	126629953	126633646	0.00344743	gi|657967730|ref|XP_008375557.1|	0	PREDICTED: dnaJ protein homolog [Malus domestica]
TR140571_c0_g1_i2	5D	144610430	144612137	0.0250901	gi|566553938|emb|CDJ80006.1|	7.53e-65	phosphate transporter, partial [Triticum aestivum]
TR147739_c0_g1_i2	5D	48907700	48908454	0.0308639	gi|326505134|dbj|BAK02954.1|	3.83e-28	predicted protein [Hordeum vulgare subsp. vulgare]
TR151068_c3_g1_i2	5D	52308698	52309487	0.0438909	gi|326496921|dbj|BAJ98487.1|	8.63e-144	predicted protein [Hordeum vulgare subsp. vulgare]
TR160170_c0_g4_i5	5D	128809310	128812444	0.0441274	gi|475571142|gb|EMT16184.1|	0	Disease resistance protein RPM1 [Aegilops tauschii]
TR163604_c2_g2_i1	5D	36702102	36706105	0.0143979	gi|357162065|ref|XP_003579293.1|	0	PREDICTED: pentatricopeptide repeat-containing protein At2g31400, chloroplastic [Brachypodium distachyon]
TR163793_c0_g1_i2	5D	37692357	37693629	0.0081449	gi|326494982|dbj|BAJ85586.1|	6.59e-112	predicted protein [Hordeum vulgare subsp. vulgare]
TR174933_c0_g1_i6	5D	50092216	50107171	0.003164	gi|475588573|gb|EMT20908.1|	4.34e-86	hypothetical protein F775_07236 [Aegilops tauschii]
TR176344_c0_g3_i1	5D	143942341	143944771	0.0211638	gi|475373055|gb|EMT00574.1|	0	Receptor-like protein kinase FERONIA [Aegilops tauschii]
TR176401_c2_g2_i1	5D	69462204	69462819	2.49e-06	gi|326501382|dbj|BAK02480.1|	5.98e-137	predicted protein [Hordeum vulgare subsp. vulgare]
TR177187_c2_g2_i3	5D	39304053	39305858	0.0471685	gi|326527739|dbj|BAK08144.1|	1.58e-180	predicted protein [Hordeum vulgare subsp. vulgare]
TR178037_c0_g1_i2	5D	91533952	91538093	0.0438208	gi|326510495|dbj|BAJ87464.1|	0	predicted protein [Hordeum vulgare subsp. vulgare]
TR182109_c0_g1_i1	5D	93575329	93579767	0.0269625	gi|326493196|dbj|BAJ85059.1|	0	predicted protein [Hordeum vulgare subsp. vulgare]
TR182988_c9_g3_i3	5D	134094008	134099709	0.0298209	gi|357114418|ref|XP_003558997.1|	2.93e-98	PREDICTED: upstream activation factor subunit spp27-like isoform X1 [Brachypodium distachyon]
TR183770_c0_g1_i1	5D	46512449	46515083	0.0168548	gi|326490561|dbj|BAJ84944.1|	1.2e-60	predicted protein [Hordeum vulgare subsp. vulgare]
TR184126_c6_g2_i8	5D	5652586	5654197	0.0186288	gi|475582614|gb|EMT19182.1|	4.82e-35	hypothetical protein F775_43728 [Aegilops tauschii]
[truncated: 610 more rows]

## Sheet: The second circle_NHNvsN(I.T)
Gene_id	Gene ID	Chr_start	Chr_end	FDR	Geninfo identifier	E-value	Function annotation
TCONS_00098263	4B	210338	211821	0.0399698	gi|357160256|ref|XP_003578706.1|	0	PREDICTED: ABC transporter F family member 1-like [Brachypodium distachyon]
TCONS_00079707	3D	221415	224996	0.00748206	gi|669027103|emb|CDM80319.1|	0	unnamed protein product [Triticum aestivum]
TCONS_00085612	3D	380680	381295	5.19e-05	NA	NA	NA
TCONS_00052918	3A	461254	463981	0.0493952	gi|474386647|gb|EMS65047.1|	0	L-type lectin-domain containing receptor kinase IV.2 [Triticum urartu]
TCONS_00079715	3D	511467	511549	0.0242419	gi|475575254|gb|EMT17220.1|	1.23e-28	hypothetical protein F775_24505 [Aegilops tauschii]
TCONS_00058868	3B	644616	644834	0.00136195	gi|669026893|emb|CDM80000.1|	2.68e-145	unnamed protein product [Triticum aestivum]
TR233355_c3_g2_i2	1B	652973	655179	0.00761516	gi|475594532|gb|EMT22712.1|	0	Putative LRR receptor-like serine/threonine-protein kinase [Aegilops tauschii]
TCONS_00179043	7D	789846	792041	0.0386984	gi|475627651|gb|EMT33735.1|	0	LRR receptor-like serine/threonine-protein kinase FLS2 [Aegilops tauschii]
TCONS_00079733	3D	821975	822349	0.00176202	gi|357135051|ref|XP_003569125.1|	0	PREDICTED: probable receptor-like protein kinase At1g67000 [Brachypodium distachyon]
TCONS_00012295	1B	880274	881681	4.52e-07	gi|475617113|gb|EMT29999.1|	0	Wall-associated receptor kinase 4 [Aegilops tauschii]
TCONS_00103722	4D	934636	935092	0.0196094	gi|357116823|ref|XP_003560176.1|	0	PREDICTED: endoplasmic reticulum oxidoreductin-1-like isoform X1 [Brachypodium distachyon]
TCONS_00058891	3B	968873	969093	0.00251066	gi|669026904|emb|CDM80015.1|	2.43e-94	unnamed protein product [Triticum aestivum]
TR237916_c1_g4_i3	3B	969001	970652	0.0230747	gi|473763932|gb|EMS45882.1|	3.15e-27	hypothetical protein TRIUR3_14872 [Triticum urartu]
TR237916_c1_g4_i10	3B	969001	970652	0.00116269	gi|669026893|emb|CDM80000.1|	1.1e-93	unnamed protein product [Triticum aestivum]
TR237916_c1_g4_i5	3B	969001	970652	0.0146901	gi|669026893|emb|CDM80000.1|	2.44e-73	unnamed protein product [Triticum aestivum]
TR237916_c1_g1_i1	3B	969001	970652	0.00303304	gi|473763932|gb|EMS45882.1|	7.77e-29	hypothetical protein TRIUR3_14872 [Triticum urartu]
TCONS_00082564	3D	1058404	1059796	0.0492471	gi|669031531|emb|CDM86560.1|	0	unnamed protein product [Triticum aestivum]
TR233411_c1_g1_i6	3A	1114113	1116251	0.0202607	gi|736543797|gb|AJA71630.1|	0	receptor kinase [Triticum aestivum]
TCONS_00079752	3D	1128359	1129118	0.0166674	gi|669027101|emb|CDM80316.1|	0	unnamed protein product [Triticum aestivum]
TCONS_00079754	3D	1168075	1168229	0.000663047	gi|475505367|gb|EMT04715.1|	0	hypothetical protein F775_15796 [Aegilops tauschii]
TR220811_c2_g2_i2	3A	1409739	1410272	0.00372528	gi|474219608|gb|EMS59205.1|	0	Putative serine/threonine-protein kinase-like protein CCR3 [Triticum urartu]
TCONS_00000031	1A	1527571	1528404	0.0477083	gi|326516936|dbj|BAJ96460.1|	0	predicted protein [Hordeum vulgare subsp. vulgare]
TR206767_c7_g1_i17	7D	1615251	1620634	0.036915	gi|475598902|gb|EMT24075.1|	0	Disease resistance protein RPP13 [Aegilops tauschii]
TCONS_00023145	2A	1937415	1940801	0.0469682	gi|125491395|gb|ABN43184.1|	1.35e-31	WRKY transcription factor [Triticum aestivum]
TR210695_c3_g1_i1	2D	2077632	2078345	0.0214707	gi|475613238|gb|EMT28697.1|	4.13e-146	hypothetical protein F775_17436 [Aegilops tauschii]
TCONS_00058938	3B	2297664	2298350	0.00162104	gi|669026950|emb|CDM80077.1|	0	unnamed protein product [Triticum aestivum]
TCONS_00017486	1D	2453962	2456672	0.0414581	gi|475561618|gb|EMT13802.1|	0	Putative serine/threonine-protein kinase receptor [Aegilops tauschii]
TR219190_c0_g2_i1	2D	2457123	2461535	0.024187	gi|475606372|gb|EMT26378.1|	5.92e-24	hypothetical protein F775_26647 [Aegilops tauschii]
TCONS_00048175	2D	2510047	2510267	0.00327526	gi|669027693|emb|CDM81233.1|	6.06e-85	unnamed protein product [Triticum aestivum]
TR175462_c1_g1_i3	3B	2529421	2530282	0.000488848	gi|669026953|emb|CDM80080.1|	2.34e-12	unnamed protein product [Triticum aestivum]
TR175462_c1_g1_i6	3B	2529421	2530282	0.000153615	gi|669026953|emb|CDM80080.1|	2.9e-11	unnamed protein product [Triticum aestivum]
TCONS_00174685	7D	2658489	2659967	0.0330785	NA	NA	NA
TCONS_00069376	3B	2720488	2720914	1.73e-59	gi|218195906|gb|EEC78333.1|	0	hypothetical protein OsI_18074 [Oryza sativa Indica Group]
TCONS_00079802	3D	2795207	2795270	0.0328951	gi|475614912|gb|EMT29241.1|	2.06e-70	hypothetical protein F775_32308 [Aegilops tauschii]
TCONS_00008094	1B	2836660	2836715	0.0150563	gi|669027170|emb|CDM80425.1|	9.24e-60	unnamed protein product [Triticum aestivum]
TCONS_00023192	2A	2923916	2923968	0.0182443	gi|721696362|ref|XP_010240705.1|	0	PREDICTED: putative disease resistance protein RGA3 [Brachypodium distachyon]
TR182688_c1_g1_i2	1A	3045791	3048547	0.0329771	gi|474277337|gb|EMS61126.1|	0	Disease resistance protein RPM1 [Triticum urartu]
TCONS_00003885	1A	3222564	3225650	0.0312063	gi|473886552|gb|EMS48158.1|	0	Disease resistance protein RPM1 [Triticum urartu]
TR211589_c1_g1_i8	2D	3237704	3240579	0.0308359	gi|475572428|gb|EMT16497.1|	0	Disease resistance protein RPM1 [Aegilops tauschii]
TCONS_00174705	7D	3246472	3247303	2.08e-59	gi|944085050|gb|KQK20402.1|	4.86e-68	hypothetical protein BRADI_1g54312, partial [Brachypodium distachyon]
TCONS_00027562	2A	3247597	3247744	0.028701	gi|475511047|gb|EMT05350.1|	3.93e-62	Glyoxylate reductase [Aegilops tauschii]
TCONS_00017505	1D	3253390	3254850	0.0141253	gi|195975956|gb|ACG63524.1|	0	resistance protein RGA2 [Triticum urartu]
TCONS_00082630	3D	3372264	3372751	0.0412444	gi|475611741|gb|EMT28199.1|	3.72e-86	Vacuolar-processing enzyme beta-isozyme [Aegilops tauschii]
TCONS_00124831	5D	3604784	3605112	0.0204393	gi|475534448|gb|EMT08570.1|	0	hypothetical protein F775_04405 [Aegilops tauschii]
TCONS_00043992	2D	3630565	3630667	0.0423387	gi|357166522|ref|XP_003580738.1|	0	PREDICTED: acetyl-CoA acetyltransferase, cytosolic 1-like [Brachypodium distachyon]
TR211589_c1_g1_i5	2D	3650368	3654567	2.9e-05	gi|475572428|gb|EMT16497.1|	0	Disease resistance protein RPM1 [Aegilops tauschii]
TR211589_c1_g1_i6	2D	3650368	3654567	0.0174567	gi|475572428|gb|EMT16497.1|	0	Disease resistance protein RPM1 [Aegilops tauschii]
TCONS_00133667	6A	3690802	3692884	1.53e-59	gi|473896852|gb|EMS49010.1|	0	hypothetical protein TRIUR3_02136 [Triticum urartu]
TCONS_00000115	1A	3730675	3731449	3.98e-59	gi|474206592|gb|EMS58702.1|	0	hypothetical protein TRIUR3_07427 [Triticum urartu]
TCONS_00161767	7B	3746191	3747801	0.0167337	gi|473794329|gb|EMS46435.1|	0	Disease resistance protein RPM1 [Triticum urartu]
TR230052_c0_g1_i2	7B	3746191	3748570	0.00916139	gi|473794329|gb|EMS46435.1|	0	Disease resistance protein RPM1 [Triticum urartu]
TCONS_00027606	2A	3978834	3982970	0.00544748	gi|474201516|gb|EMS58500.1|	0	hypothetical protein TRIUR3_29729 [Triticum urartu]
TR224318_c0_g1_i4	7A	4153569	4156424	0.0372108	gi|474346215|gb|EMS62835.1|	0	hypothetical protein TRIUR3_00815 [Triticum urartu]
TR237576_c0_g1_i1	6A	4602656	4604148	0.0103224	gi|937901542|dbj|BAS76596.1|	4.28e-76	Os02g0109200 [Oryza sativa Japonica Group]
TCONS_00027637	2A	4948057	4949812	0.000476917	gi|473904586|gb|EMS49294.1|	0	Cysteine-rich receptor-like protein kinase 41 [Triticum urartu]
TR192192_c2_g1_i3	2A	4948082	4951281	0.000837632	gi|475608139|gb|EMT26935.1|	5.86e-120	Putative cysteine-rich receptor-like protein kinase 23 [Aegilops tauschii]
TCONS_00048271	2D	4972087	4973257	0.0109932	gi|475522684|gb|EMT06786.1|	2.03e-171	Putative serine/threonine-protein kinase-like protein CCR3 [Aegilops tauschii]
TCONS_00154204	6D	4972941	4975003	0.0280127	gi|475543049|gb|EMT10071.1|	0	LRR receptor-like serine/threonine-protein kinase FLS2 [Aegilops tauschii]
TCONS_00093812	4B	5441616	5441834	0.0047364	gi|326519430|dbj|BAJ96714.1|	1.57e-86	predicted protein [Hordeum vulgare subsp. vulgare]
TCONS_00114578	5B	5462132	5462488	0.0388219	gi|475588177|gb|EMT20785.1|	1.95e-176	hypothetical protein F775_00102 [Aegilops tauschii]
TR192339_c0_g2_i5	2A	5660860	5663270	0.0260334	gi|32968176|emb|CAE12013.1|	1.43e-169	beta3-glucuronyltransferase, partial [Hordeum vulgare]
TCONS_00141132	6B	6023386	6023623	0.0322903	gi|573912268|ref|XP_006643848.1|	2.84e-20	PREDICTED: phosducin-like protein 3-like [Oryza brachyantha]
TCONS_00136989	6A	6125369	6127153	0.0351951	gi|326503198|dbj|BAJ99224.1|	2.36e-134	predicted protein [Hordeum vulgare subsp. vulgare]
TCONS_00098358	4B	6133434	6135150	1.08e-05	gi|326517262|dbj|BAJ99997.1|	3.41e-72	predicted protein, partial [Hordeum vulgare subsp. vulgare]
TCONS_00082734	3D	6189209	6190551	0.00641115	gi|721625984|ref|XP_010229240.1|	0	PREDICTED: G-type lectin S-receptor-like serine/threonine-protein kinase At2g19130 [Brachypodium distachyon]
TCONS_00037984	2B	6277714	6278256	0.00779682	gi|326506560|dbj|BAJ91321.1|	5.69e-112	predicted protein, partial [Hordeum vulgare subsp. vulgare]
TCONS_00055764	3A	6341383	6342228	0.0337101	gi|472900111|gb|EMS35637.1|	3.53e-93	Bowman-Birk type trypsin inhibitor [Triticum urartu]
TCONS_00154877	7A	6348953	6348968	0.0315798	gi|197726080|gb|ACH73191.1|	1.02e-180	fructan:fructan 1-fructosyltransferase [Triticum aestivum]
TCONS_00103982	4D	6369751	6370884	0.017198	gi|823262105|ref|XP_012463793.1|	5.41e-19	PREDICTED: aspartic proteinase-like protein 2 [Gossypium raimondii]
TCONS_00027693	2A	6453418	6454856	0.0367108	gi|475549810|gb|EMT11320.1|	5.86e-124	Cytochrome P450 76C4 [Aegilops tauschii]
TR66642_c0_g1_i1	7B	6579679	6582498	0.023356	gi|702307490|ref|XP_010050115.1|	0	PREDICTED: pyrophosphate-energized vacuolar membrane proton pump [Eucalyptus grandis]
TCONS_00154889	7A	6874116	6874242	0.0372793	gi|475612537|gb|EMT28441.1|	0	Disease resistance protein RPM1 [Aegilops tauschii]
TCONS_00055777	3A	6925159	6926022	0.0371202	gi|326521002|dbj|BAJ92864.1|	0	predicted protein, partial [Hordeum vulgare subsp. vulgare]
TCONS_00023342	2A	7019529	7019830	0.000121467	gi|474373826|gb|EMS64057.1|	1.61e-137	hypothetical protein TRIUR3_02361 [Triticum urartu]
TCONS_00119418	5B	7024985	7026386	0.0127884	gi|326528349|dbj|BAJ93356.1|	4.99e-68	predicted protein [Hordeum vulgare subsp. vulgare]
TR166032_c0_g2_i4	3A	7100070	7102182	0.0201224	gi|326506468|dbj|BAJ86552.1|	6.02e-141	predicted protein [Hordeum vulgare subsp. vulgare]
TCONS_00027711	2A	7133944	7136049	0.0147551	gi|115457186|ref|NP_001052193.1|	0	Os04g0185600 [Oryza sativa Japonica Group]
TCONS_00114636	5B	7599300	7599459	0.0341291	gi|474376758|gb|EMS64211.1|	0	Ubiquitin carboxyl-terminal hydrolase 8 [Triticum urartu]
TCONS_00007321	1A	7651327	7652204	0.0457917	gi|475583307|gb|EMT19417.1|	4.91e-75	hypothetical protein F775_29535 [Aegilops tauschii]
TCONS_00012445	1B	7882521	7884662	0.0249225	gi|326491913|dbj|BAJ98181.1|	0	predicted protein [Hordeum vulgare subsp. vulgare]
TCONS_00048373	2D	8224475	8224881	0.0478525	gi|475550460|gb|EMT11448.1|	0	Putative white-brown complex-30-like protein [Aegilops tauschii]
TCONS_00055825	3A	8722688	8723784	0.00592125	gi|475565430|gb|EMT14789.1|	0	Zeamatin [Aegilops tauschii]
TR211814_c0_g1_i13	2A	8762120	8766031	0.0495725	NA	NA	NA
TCONS_00154932	7A	8842162	8842581	0.00043591	gi|944084347|gb|KQK19699.1|	0	hypothetical protein BRADI_1g49880 [Brachypodium distachyon]
TR172278_c6_g1_i1	4B	9006185	9006910	0.0345828	gi|475554629|gb|EMT12265.1|	5.71e-13	hypothetical protein F775_23973 [Aegilops tauschii]
TCONS_00114657	5B	9103200	9105873	0.036797	gi|430900057|gb|AGA83648.1|	0	9-cis-epoxycarotenoid dioxygenase [Triticum aestivum]
TCONS_00069516	3B	9230394	9230549	0.0243123	gi|474219608|gb|EMS59205.1|	1.74e-143	Putative serine/threonine-protein kinase-like protein CCR3 [Triticum urartu]
TCONS_00059104	3B	9233397	9235437	0.0252087	gi|474219608|gb|EMS59205.1|	0	Putative serine/threonine-protein kinase-like protein CCR3 [Triticum urartu]
TCONS_00012495	1B	9506876	9507317	0.0457469	NA	NA	NA
TCONS_00023422	2A	9636899	9640529	0.00992762	gi|475591664|gb|EMT21837.1|	0	Putative LRR receptor-like serine/threonine-protein kinase [Aegilops tauschii]
TCONS_00023444	2A	10266529	10267267	0.00351352	gi|326528433|dbj|BAJ93405.1|	0	predicted protein [Hordeum vulgare subsp. vulgare]
TCONS_00151046	6D	10353135	10355790	0.0155859	gi|475521505|gb|EMT06629.1|	3.67e-62	Cysteine-rich receptor-like protein kinase 29 [Aegilops tauschii]
TCONS_00012525	1B	10400003	10400369	0.00704425	gi|475562024|gb|EMT13904.1|	1.44e-100	Soluble inorganic pyrophosphatase [Aegilops tauschii]
TCONS_00147710	6D	11132958	11133438	0.0363163	gi|326508124|dbj|BAJ99329.1|	2.55e-40	predicted protein [Hordeum vulgare subsp. vulgare]
TCONS_00133885	6A	11147822	11148035	0.039722	gi|629103434|gb|KCW68903.1|	2.24e-15	hypothetical protein EUGRSUZ_F02483 [Eucalyptus grandis]
TCONS_00129173	5D	11169154	11171201	2.45e-59	gi|115489722|ref|NP_001067348.1|	0	Os12g0632900 [Oryza sativa Japonica Group]
TCONS_00151073	6D	11355769	11356620	0.00115821	gi|475583646|gb|EMT19527.1|	0	Linalool synthase, chloroplastic [Aegilops tauschii]
TCONS_00151074	6D	11355915	11356277	2e-05	gi|475583646|gb|EMT19527.1|	0	Linalool synthase, chloroplastic [Aegilops tauschii]
TCONS_00055910	3A	11515961	11516293	0.0371757	gi|475539118|gb|EMT09354.1|	0	hypothetical protein F775_21774 [Aegilops tauschii]
TCONS_00012539	1B	11696975	11697327	7.11e-05	gi|357110984|ref|XP_003557295.1|	0	PREDICTED: poly [ADP-ribose] polymerase 1 [Brachypodium distachyon]
TCONS_00154991	7A	11918574	11918598	0.00164613	gi|473808754|gb|EMS46759.1|	0	Disease resistance protein RPM1 [Triticum urartu]
TCONS_00017691	1D	11995106	11997494	0.0334741	gi|475583305|gb|EMT19415.1|	0	Lectin-domain containing receptor kinase A4.3 [Aegilops tauschii]
TCONS_00027823	2A	12050035	12050187	0.0443455	gi|474174425|gb|EMS57707.1|	0	U-box domain-containing protein 33 [Triticum urartu]
TCONS_00119467	5B	12127722	12129030	0.0398438	gi|475536903|gb|EMT08989.1|	4.64e-58	hypothetical protein F775_29404 [Aegilops tauschii]
TCONS_00137170	6A	12536740	12537912	0.0302084	gi|326515452|dbj|BAK03639.1|	0	predicted protein [Hordeum vulgare subsp. vulgare]
TCONS_00179120	7D	12632662	12634387	0.000837521	gi|475617671|gb|EMT30202.1|	6.28e-32	hypothetical protein F775_43253 [Aegilops tauschii]
TCONS_00125004	5D	12792128	12792152	0.014328	gi|473776278|gb|EMS45946.1|	6.42e-139	LRR receptor-like serine/threonine-protein kinase GSO2 [Triticum urartu]
TR191074_c0_g1_i4	6A	12865206	12865850	0.00585729	gi|474141970|gb|EMS56559.1|	5.37e-15	hypothetical protein TRIUR3_26533 [Triticum urartu]
TCONS_00032886	2B	13131978	13134352	0.00693568	gi|475618047|gb|EMT30323.1|	0	Putative LRR receptor-like serine/threonine-protein kinase [Aegilops tauschii]
TCONS_00027866	2A	13316412	13317061	0.00529127	gi|475571656|gb|EMT16313.1|	0	Serine/threonine-protein kinase PBS1 [Aegilops tauschii]
TCONS_00089801	4A	13346424	13346877	0.0168755	gi|326503656|dbj|BAJ86334.1|	1.97e-79	predicted protein [Hordeum vulgare subsp. vulgare]
TCONS_00004094	1A	13376232	13378485	0.0479031	gi|326499876|dbj|BAJ90773.1|	0	predicted protein [Hordeum vulgare subsp. vulgare]
TCONS_00170550	7D	13515238	13516203	0.0470556	gi|474400224|gb|EMS65992.1|	4e-85	GDP-mannose 4,6 dehydratase 2 [Triticum urartu]
TCONS_00044360	2D	13833548	13833672	0.00825325	gi|475510109|gb|EMT05244.1|	0	Cysteine-rich receptor-like protein kinase 25 [Aegilops tauschii]
TCONS_00012581	1B	14119096	14119541	0.011825	gi|473749317|gb|EMS45563.1|	1.69e-15	hypothetical protein TRIUR3_09513 [Triticum urartu]
TCONS_00023616	2A	14679610	14680985	0.00641037	gi|326506366|dbj|BAJ86501.1|	0	predicted protein [Hordeum vulgare subsp. vulgare]
TCONS_00056047	3A	14892608	14893078	1.2e-58	gi|326514334|dbj|BAJ96154.1|	4.88e-14	predicted protein, partial [Hordeum vulgare subsp. vulgare]
TCONS_00155044	7A	14899689	14900767	0.0159708	gi|63175650|gb|AAY34783.1|	1.47e-81	wall-associated kinase 3 [Triticum aestivum]
TCONS_00089825	4A	15117679	15118447	0.0144112	gi|474009275|gb|EMS52521.1|	0	Protein saal1 [Triticum urartu]
TCONS_00170586	7D	15283795	15285063	0.0125431	gi|219814399|gb|ACL36475.1|	0	lectin receptor kinase 1 [Triticum aestivum]
TR177386_c1_g1_i3	2B	15301631	15305003	0.0435178	gi|475571656|gb|EMT16313.1|	7.97e-176	Serine/threonine-protein kinase PBS1 [Aegilops tauschii]
TCONS_00146915	6B	15317116	15317775	0.0118265	NA	NA	NA
TR224377_c0_g1_i7	6A	15551262	15555643	0.0299003	gi|475574941|gb|EMT17118.1|	4.12e-73	hypothetical protein F775_10283 [Aegilops tauschii]
TR170015_c3_g1_i3	2B	15994026	15997522	0.0485274	gi|310942472|dbj|BAJ24153.1|	2.17e-78	seven trans-membrane protein [Triticum aestivum]
TCONS_00044431	2D	16121411	16122139	0.015231	gi|475577357|gb|EMT17781.1|	1.36e-41	hypothetical protein F775_23922 [Aegilops tauschii]
TCONS_00179141	7D	16237186	16238700	0.00886287	gi|63175650|gb|AAY34783.1|	0	wall-associated kinase 3 [Triticum aestivum]
TCONS_00032927	2B	16461090	16461566	0.0384945	gi|474350784|gb|EMS62999.1|	2.75e-155	hypothetical protein TRIUR3_15419 [Triticum urartu]
TCONS_00038176	2B	16875452	16877230	0.0049353	gi|475601247|gb|EMT24756.1|	0	Lectin-domain containing receptor kinase A4.3 [Aegilops tauschii]
TCONS_00032935	2B	16934817	16935790	0.0382742	gi|474443506|gb|EMS68496.1|	0	Premnaspirodiene oxygenase [Triticum urartu]
TCONS_00161963	7B	16952119	16952539	0.0356838	gi|326510703|dbj|BAJ91699.1|	3.57e-148	predicted protein [Hordeum vulgare subsp. vulgare]
TCONS_00119542	5B	16993545	16995386	1.39e-59	gi|326512916|dbj|BAK03365.1|	2.31e-21	predicted protein [Hordeum vulgare subsp. vulgare]
TCONS_00098666	4B	17244448	17244935	0.0208222	gi|474168989|gb|EMS57486.1|	1.88e-108	Putative 3,4-dihydroxy-2-butanone kinase [Triticum urartu]
TCONS_00119553	5B	17244645	17245159	0.0249574	NA	NA	NA
TCONS_00069753	3B	17277193	17277700	0.0147486	gi|474063556|gb|EMS54061.1|	7.98e-33	hypothetical protein TRIUR3_21283 [Triticum urartu]
TCONS_00069760	3B	17317775	17319724	0.00548418	gi|474268389|gb|EMS60775.1|	5.03e-74	E3 ubiquitin-protein ligase EL5 [Triticum urartu]
TCONS_00044490	2D	17317993	17318370	0.0442185	gi|475621273|gb|EMT31416.1|	0	Secologanin synthase [Aegilops tauschii]
TCONS_00059299	3B	17402427	17403248	0.0165037	gi|669027189|emb|CDM80453.1|	3.42e-168	unnamed protein product [Triticum aestivum]
TCONS_00104213	4D	17713548	17714115	0.00117399	gi|326511236|dbj|BAJ87632.1|	0	predicted protein [Hordeum vulgare subsp. vulgare]
TR178771_c3_g3_i9	2D	17795121	17797175	0.0274816	gi|475620216|gb|EMT31034.1|	0	Lectin-domain containing receptor kinase A4.3 [Aegilops tauschii]
TCONS_00044508	2D	17802681	17803288	0.0375159	gi|475620216|gb|EMT31034.1|	0	Lectin-domain containing receptor kinase A4.3 [Aegilops tauschii]
TR178771_c3_g3_i10	2D	17802681	17805863	0.0251345	gi|475620216|gb|EMT31034.1|	0	Lectin-domain containing receptor kinase A4.3 [Aegilops tauschii]
TR164426_c0_g1_i2	1B	18205127	18206243	0.0304103	gi|475620358|gb|EMT31079.1|	3.49e-56	Non-specific lipid-transfer protein-like protein [Aegilops tauschii]
TCONS_00129286	5D	18267075	18268061	0.000118545	gi|475576912|gb|EMT17675.1|	0	Subtilisin-like protease [Aegilops tauschii]
TCONS_00043248	2B	18313848	18315254	0.0262093	NA	NA	NA
TCONS_00052427	2D	18655773	18657135	0.0143811	NA	NA	NA
TCONS_00151232	6D	18753527	18754015	0.0458485	gi|474226885|gb|EMS59482.1|	4.56e-15	hypothetical protein TRIUR3_29339 [Triticum urartu]
TCONS_00111692	5A	19001342	19002083	0.0176398	gi|474004755|gb|EMS52356.1|	4.19e-08	hypothetical protein TRIUR3_29723 [Triticum urartu]
TR198937_c7_g2_i2	2D	19273259	19274724	0.00708832	gi|57635149|gb|AAW52716.1|	9.9e-35	peroxidase 2 [Triticum monococcum]
TCONS_00106901	4D	19527163	19527668	0.0144692	gi|475525989|gb|EMT07237.1|	4e-81	Putative LRR receptor-like serine/threonine-protein kinase [Aegilops tauschii]
TCONS_00023716	2A	19674645	19674868	0.0195934	gi|326495664|dbj|BAJ85928.1|	2.38e-151	predicted protein [Hordeum vulgare subsp. vulgare]
TCONS_00134063	6A	19960327	19960586	1.39e-59	gi|474403167|gb|EMS66252.1|	2.66e-45	hypothetical protein TRIUR3_20993 [Triticum urartu]
TCONS_00028031	2A	20267308	20269773	0.00943438	NA	NA	NA
TR178814_c6_g1_i1	5D	20342522	20344594	0.00285053	gi|474431515|gb|EMS67974.1|	2.51e-29	Anthocyanidin 5,3-O-glucosyltransferase [Triticum urartu]
TCONS_00012656	1B	20449267	20449751	0.0330879	gi|474147375|gb|EMS56814.1|	3.32e-71	Methionine aminopeptidase 1B, chloroplastic [Triticum urartu]
TCONS_00125236	5D	20822940	20823338	0.0370828	gi|326529123|dbj|BAK00955.1|	5.1e-62	predicted protein [Hordeum vulgare subsp. vulgare]
TCONS_00083078	3D	22567106	22569318	0.0278491	gi|475615412|gb|EMT29435.1|	6.86e-128	Putative mitochondrial chaperone bcs1 [Aegilops tauschii]
TCONS_00083091	3D	23173369	23173801	0.0275624	gi|669029217|emb|CDM83358.1|	7.49e-87	unnamed protein product [Triticum aestivum]
TCONS_00000454	1A	23990192	23990885	0.0330879	gi|473776668|gb|EMS45951.1|	2.06e-12	hypothetical protein TRIUR3_23092 [Triticum urartu]
TCONS_00125300	5D	23995489	23998302	0.0286693	gi|326513864|dbj|BAJ87950.1|	4.39e-108	predicted protein [Hordeum vulgare subsp. vulgare]
TCONS_00053479	3A	24560021	24560671	0.0497465	gi|473983668|gb|EMS51636.1|	2.56e-28	hypothetical protein TRIUR3_10394 [Triticum urartu]
TCONS_00129394	5D	24562855	24565322	0.0151815	gi|326495058|dbj|BAJ85625.1|	0	predicted protein [Hordeum vulgare subsp. vulgare]
TCONS_00069894	3B	24667764	24668292	1.36e-05	gi|669027287|emb|CDM80597.1|	0	unnamed protein product [Triticum aestivum]
TCONS_00059407	3B	24942563	24942799	0.00588825	gi|669027287|emb|CDM80597.1|	0	unnamed protein product [Triticum aestivum]
TR224191_c2_g2_i1	3B	24942563	24944372	0.00790666	gi|669027287|emb|CDM80597.1|	1.49e-35	unnamed protein product [Triticum aestivum]
TR202590_c2_g1_i8	3B	24942563	24944372	0.0440797	gi|669027287|emb|CDM80597.1|	0	unnamed protein product [Triticum aestivum]
TCONS_00147950	6D	25632207	25632985	0.0193118	gi|475479816|gb|EMT02813.1|	0	Tyrosine-sulfated glycopeptide receptor 1 [Aegilops tauschii]
TCONS_00059436	3B	25677813	25678129	0.000183233	gi|326506568|dbj|BAJ91325.1|	0	predicted protein [Hordeum vulgare subsp. vulgare]
TCONS_00020587	1D	25826712	25827828	0.0494883	gi|475607129|gb|EMT26598.1|	0	hypothetical protein F775_15420 [Aegilops tauschii]
TR226244_c1_g2_i5	1D	26025449	26027694	0.0136402	gi|326495180|dbj|BAJ85686.1|	0	predicted protein, partial [Hordeum vulgare subsp. vulgare]
TCONS_00053525	3A	26140013	26140734	0.0275335	gi|669028077|emb|CDM81749.1|	1.53e-76	unnamed protein product [Triticum aestivum]
TCONS_00031899	2A	26326046	26328015	0.00192685	gi|475461095|gb|EMT02043.1|	1.88e-13	Sulfotransferase 17 [Aegilops tauschii]
TR186116_c0_g3_i6	7A	26413281	26413467	0.0389131	gi|326510703|dbj|BAJ91699.1|	6.23e-101	predicted protein [Hordeum vulgare subsp. vulgare]
TCONS_00080452	3D	26839877	26839990	0.0100187	gi|474343136|gb|EMS62721.1|	9.23e-80	O-acyltransferase WSD1 [Triticum urartu]
TCONS_00049108	2D	26940644	26940716	0.00273134	gi|475433638|gb|EMT01263.1|	0	Disease resistance protein RPS2 [Aegilops tauschii]
TCONS_00144444	6B	26951526	26952071	0.00560719	gi|326499562|dbj|BAJ86092.1|	0	predicted protein [Hordeum vulgare subsp. vulgare]
TCONS_00038305	2B	27229352	27230194	0.0182171	gi|57635149|gb|AAW52716.1|	0	peroxidase 2 [Triticum monococcum]
TR222682_c0_g1_i1	4A	27314277	27316353	0.00454644	gi|473780471|gb|EMS46048.1|	0	Endo-1,4-beta-xylanase C [Triticum urartu]
TCONS_00028126	2A	27768059	27769306	7.75e-05	gi|475546351|gb|EMT10667.1|	2.41e-32	hypothetical protein F775_27842 [Aegilops tauschii]
TR192218_c1_g2_i5	4B	28270751	28284629	2.15e-59	gi|474013047|gb|EMS52652.1|	0	Acyl-CoA-binding domain-containing protein 4 [Triticum urartu]
TCONS_00175388	7D	28279140	28280251	0.0383296	gi|475533428|gb|EMT08386.1|	0	Telomere-associated protein RIF1 [Aegilops tauschii]
TR197687_c1_g2_i9	5B	28281041	28283422	0.0106355	gi|473895729|gb|EMS48964.1|	0	hypothetical protein TRIUR3_23268 [Triticum urartu]
TCONS_00090031	4A	28400992	28401566	0.0410715	gi|573924602|ref|XP_006649863.1|	0	PREDICTED: arginine biosynthesis bifunctional protein ArgJ, chloroplastic-like [Oryza brachyantha]
TCONS_00151412	6D	28959522	28961886	0.0140158	gi|475605470|gb|EMT26076.1|	0	Tyrosine-sulfated glycopeptide receptor 1 [Aegilops tauschii]
TCONS_00125387	5D	29027705	29028174	0.0301287	gi|473838741|gb|EMS47277.1|	0	putative WRKY transcription factor 41 [Triticum urartu]
TCONS_00056257	3A	29620883	29621303	0.00363715	gi|326494576|dbj|BAJ94407.1|	0	predicted protein [Hordeum vulgare subsp. vulgare]
TCONS_00148031	6D	29798641	29798908	0.0107009	gi|475475050|gb|EMT02554.1|	0	LRR receptor-like serine/threonine-protein kinase FLS2 [Aegilops tauschii]
TR223510_c1_g2_i3	4A	30494782	30497306	0.00141968	gi|475602564|gb|EMT25176.1|	8.07e-155	3-ketoacyl-CoA synthase 4 [Aegilops tauschii]
TR210422_c1_g6_i2	7D	31118625	31119606	0.0110555	gi|326490752|dbj|BAJ90043.1|	4.9e-21	predicted protein [Hordeum vulgare subsp. vulgare]
TCONS_00170910	7D	31118625	31119606	0.00270262	gi|475626584|gb|EMT33399.1|	8.87e-71	hypothetical protein F775_52422 [Aegilops tauschii]
TCONS_00129500	5D	31318610	31319347	0.041897	gi|475617887|gb|EMT30278.1|	4.66e-90	Calmodulin-like protein 5 [Aegilops tauschii]
TCONS_00023893	2A	31657003	31657110	0.0415888	gi|474124510|gb|EMS56147.1|	0	Vacuolar-processing enzyme [Triticum urartu]
TCONS_00033234	2B	31772027	31772430	0.00537693	gi|475594802|gb|EMT22828.1|	1.93e-157	Two-component response regulator ARR2 [Aegilops tauschii]
TR231762_c0_g3_i3	6B	32788378	32791194	0.0191502	gi|326526981|dbj|BAK00879.1|	5.12e-164	predicted protein [Hordeum vulgare subsp. vulgare]
TCONS_00044945	2D	32845221	32845877	1.39e-59	gi|326505946|dbj|BAJ91212.1|	0	predicted protein [Hordeum vulgare subsp. vulgare]
TR226590_c0_g1_i1	7A	33243412	33247774	0.0454295	gi|357124607|ref|XP_003563989.1|	0	PREDICTED: uncharacterized protein LOC100841206 [Brachypodium distachyon]
TCONS_00004341	1A	33502950	33503572	0.0193697	gi|475603587|gb|EMT25467.1|	2.09e-26	Methylthioribose kinase [Aegilops tauschii]
TCONS_00155509	7A	33554762	33555076	0.0390455	gi|944074063|gb|KQK09547.1|	2.49e-20	hypothetical protein BRADI_2g48657 [Brachypodium distachyon]
TCONS_00018041	1D	33577104	33577301	2.01e-59	gi|326524704|dbj|BAK04288.1|	7.19e-160	predicted protein, partial [Hordeum vulgare subsp. vulgare]
TCONS_00052496	2D	34233933	34234819	0.0229952	NA	NA	NA
TCONS_00000554	1A	34337860	34338329	0.0373431	gi|414868331|tpg|DAA46888.1|	5.24e-07	TPA: hypothetical protein ZEAMMB73_163327, partial [Zea mays]
TCONS_00161220	7A	34602818	34604625	0.000317493	gi|475461095|gb|EMT02043.1|	1.57e-17	Sulfotransferase 17 [Aegilops tauschii]
TCONS_00033276	2B	34615238	34617762	0.0228681	gi|326530093|dbj|BAK08326.1|	0	predicted protein [Hordeum vulgare subsp. vulgare]
TR222904_c0_g1_i5	2B	34615238	34617762	0.0191721	gi|326530093|dbj|BAK08326.1|	0	predicted protein [Hordeum vulgare subsp. vulgare]
TR174058_c0_g1_i5	2B	34928569	34930231	0.0271446	gi|326507736|dbj|BAJ86611.1|	0	predicted protein [Hordeum vulgare subsp. vulgare]
TCONS_00004401	1A	35130557	35130881	0.0477091	NA	NA	NA
TR171515_c1_g1_i2	3D	35160073	35163729	0.000318395	gi|669029740|emb|CDM84042.1|	0	unnamed protein product [Triticum aestivum]
TCONS_00161222	7A	35304113	35305574	9.3e-05	gi|475626585|gb|EMT33400.1|	2.68e-34	hypothetical protein F775_02121 [Aegilops tauschii]
TCONS_00115052	5B	35555943	35559909	0.0185054	gi|475605423|gb|EMT26056.1|	0	Putative receptor protein kinase ZmPK1 [Aegilops tauschii]
TR208392_c0_g1_i3	7A	35563923	35565112	0.0354572	gi|326510703|dbj|BAJ91699.1|	1.98e-154	predicted protein [Hordeum vulgare subsp. vulgare]
TCONS_00134342	6A	35579428	35581430	0.0129621	gi|326490914|dbj|BAJ90124.1|	0	predicted protein [Hordeum vulgare subsp. vulgare]
TR205847_c6_g1_i4	1D	36437125	36440198	0.00763872	gi|326522570|dbj|BAK07747.1|	0	predicted protein, partial [Hordeum vulgare subsp. vulgare]
TR205847_c6_g1_i5	1D	36437125	36440198	0.00606583	gi|326522570|dbj|BAK07747.1|	0	predicted protein, partial [Hordeum vulgare subsp. vulgare]
TR205847_c6_g1_i2	1D	36437125	36440198	0.00342493	gi|326522570|dbj|BAK07747.1|	0	predicted protein, partial [Hordeum vulgare subsp. vulgare]
TCONS_00059626	3B	36589409	36591478	0.0356643	gi|110289497|gb|ABB47941.2|	1.21e-62	retrotransposon protein, putative, unclassified [Oryza sativa Japonica Group]
TCONS_00056319	3A	36629896	36630718	0.00445611	gi|944085449|gb|KQK20801.1|	1.15e-88	hypothetical protein BRADI_1g56841, partial [Brachypodium distachyon]
TCONS_00125536	5D	37566277	37566675	0.0394452	gi|326520994|dbj|BAJ92860.1|	7.27e-83	predicted protein [Hordeum vulgare subsp. vulgare]
TCONS_00141771	6B	37593598	37593886	0.0012159	gi|475623692|gb|EMT32332.1|	1e-10	hypothetical protein F775_27283 [Aegilops tauschii]
TCONS_00148155	6D	37843691	37845706	0.00212124	gi|475583810|gb|EMT19578.1|	1.61e-118	hypothetical protein F775_14090 [Aegilops tauschii]
TCONS_00125547	5D	38612236	38612833	0.0138767	gi|475575892|gb|EMT17385.1|	0	B3 domain-containing protein [Aegilops tauschii]
TCONS_00031932	2A	38767050	38769577	0.0386866	NA	NA	NA
TCONS_00070137	3B	39037269	39039128	0.00285332	gi|669027474|emb|CDM80860.1|	0	unnamed protein product [Triticum aestivum]
TCONS_00171112	7D	39462347	39463081	0.00284021	gi|475593458|gb|EMT22391.1|	8.8e-75	hypothetical protein F775_04113 [Aegilops tauschii]
TR210422_c1_g12_i5	7D	39462347	39463081	0.038181	gi|475593458|gb|EMT22391.1|	1.34e-36	hypothetical protein F775_04113 [Aegilops tauschii]
TR210422_c1_g12_i4	7D	39462347	39463081	0.00912324	gi|475619073|gb|EMT30653.1|	4.03e-71	hypothetical protein F775_32666 [Aegilops tauschii]
TR230515_c0_g1_i1	4D	39695907	39696869	0.0372755	gi|475573040|gb|EMT16639.1|	7.8e-49	hypothetical protein F775_07534 [Aegilops tauschii]
TCONS_00007424	1A	39773681	39774365	0.0018594	gi|473930244|gb|EMS49944.1|	6.73e-68	hypothetical protein TRIUR3_09896 [Triticum urartu]
TR76019_c0_g1_i1	6A	39776193	39782022	3.84e-59	gi|602181972|gb|AHN91473.1|	0	4-hydroxy-3-methylbut-2-en-1-yl diphosphate synthase [Dendrobium catenatum]
TCONS_00115165	5B	40646791	40647566	0.0239734	gi|473886946|gb|EMS48193.1|	2.88e-56	hypothetical protein TRIUR3_19270 [Triticum urartu]
TCONS_00175645	7D	40768413	40768439	0.0342179	gi|475622777|gb|EMT31973.1|	0	Phosphatidylinositol 4-kinase type 2-beta [Aegilops tauschii]
TR49483_c0_g1_i1	7A	41085833	41086459	0.003911	gi|474073830|gb|EMS54457.1|	1.46e-34	Defensin Tk-AMP-D4 [Triticum urartu]
TCONS_00094380	4B	42590528	42591064	0.0209422	gi|326514694|dbj|BAJ99708.1|	4.86e-98	predicted protein [Hordeum vulgare subsp. vulgare]
TCONS_00166177	7B	42865316	42865652	0.0446142	NA	NA	NA
TCONS_00043305	2B	43001309	43004566	0.048644	gi|474062530|gb|EMS54015.1|	1.31e-51	hypothetical protein TRIUR3_32550 [Triticum urartu]
TCONS_00144686	6B	43156717	43158508	0.0461368	gi|326527143|dbj|BAK04513.1|	0	predicted protein [Hordeum vulgare subsp. vulgare]
TCONS_00080871	3D	43894031	43894543	0.0390936	gi|300681507|emb|CBH32601.1|	3.13e-34	conserved hypothetical protein, expressed [Triticum aestivum]
TCONS_00049556	2D	44145509	44146298	1.6e-59	gi|475528299|gb|EMT07603.1|	1.97e-140	hypothetical protein F775_07751 [Aegilops tauschii]
TCONS_00090316	4A	44242703	44243047	0.0455954	NA	NA	NA
TCONS_00086861	4A	44606012	44607478	0.0402397	gi|514820393|ref|XP_004984885.1|	2.41e-97	PREDICTED: abscisic acid receptor PYL4-like [Setaria italica]
TCONS_00115256	5B	45666625	45666964	0.0195456	gi|326534268|dbj|BAJ89484.1|	0	predicted protein [Hordeum vulgare subsp. vulgare]
TCONS_00120024	5B	45821936	45822278	0.046937	NA	NA	NA
TCONS_00049631	2D	45865387	45865758	0.00207267	gi|474058918|gb|EMS53923.1|	7.78e-60	hypothetical protein TRIUR3_24541 [Triticum urartu]
TCONS_00045306	2D	46195624	46196148	0.0250237	gi|475553258|gb|EMT11955.1|	1.75e-22	hypothetical protein F775_24232 [Aegilops tauschii]
TCONS_00134441	6A	46363460	46363702	0.0393996	gi|475548756|gb|EMT11145.1|	0	ABC transporter A family member 5 [Aegilops tauschii]
TCONS_00049716	2D	46782354	46783313	0.0384466	gi|944069782|gb|KQK05266.1|	4.47e-13	hypothetical protein BRADI_2g19080 [Brachypodium distachyon]
TCONS_00038650	2B	47046877	47047535	0.0142468	gi|721639333|ref|XP_010231568.1|	0	PREDICTED: protein SSUH2 homolog isoform X2 [Brachypodium distachyon]
TCONS_00140564	6A	47158299	47160004	0.0397588	NA	NA	NA
TCONS_00033534	2B	47407360	47408024	0.00827851	gi|475549406|gb|EMT11253.1|	0	hypothetical protein F775_26303 [Aegilops tauschii]
TCONS_00161279	7A	48405647	48406494	0.0223178	gi|474383810|gb|EMS64782.1|	2.66e-78	Protein TIFY 3A [Triticum urartu]
TCONS_00107513	4D	48939095	48939578	0.00678005	gi|474449822|gb|EMS68816.1|	1.24e-169	Zinc finger CCCH domain-containing protein 22 [Triticum urartu]
TR181487_c3_g1_i5	2D	48957866	48960107	0.0440797	gi|475515510|gb|EMT05864.1|	0	Lectin-domain containing receptor kinase A4.2 [Aegilops tauschii]
TCONS_00053869	3A	49426863	49427439	0.0153719	gi|474236775|gb|EMS59599.1|	0	CTP synthase [Triticum urartu]
TCONS_00053870	3A	49436489	49437073	0.0455164	NA	NA	NA
TR174933_c0_g1_i6	5D	50092216	50107171	0.0118293	gi|475588573|gb|EMT20908.1|	4.34e-86	hypothetical protein F775_07236 [Aegilops tauschii]
TCONS_00043322	2B	50201626	50202791	0.0190649	gi|474357198|gb|EMS63159.1|	1.14e-43	hypothetical protein TRIUR3_03335 [Triticum urartu]
TCONS_00038730	2B	50694923	50695242	0.00196777	gi|28555904|emb|CAD45032.1|	0	NBS-LRR disease resistance protein homologue [Hordeum vulgare]
TCONS_00083824	3D	51468966	51468997	0.0224728	gi|326494986|dbj|BAJ85588.1|	1.21e-90	predicted protein [Hordeum vulgare subsp. vulgare]
TCONS_00033579	2B	51487520	51488704	0.0454632	gi|474299584|gb|EMS61571.1|	0	putative 4-coumarate--CoA ligase 5 [Triticum urartu]
TR211614_c0_g1_i10	2B	51487700	51489627	0.00357132	gi|474299584|gb|EMS61571.1|	6.4e-77	putative 4-coumarate--CoA ligase 5 [Triticum urartu]
TCONS_00090445	4A	52113877	52114405	0.00256583	gi|472232592|emb|CCV01571.1|	0	GT43_2A [Triticum aestivum]
TCONS_00162405	7B	52206280	52206546	0.04723	gi|475543341|gb|EMT10135.1|	0	Benzoate carboxyl methyltransferase [Aegilops tauschii]
TCONS_00141896	6B	52324733	52326714	0.0430217	gi|475520211|gb|EMT06454.1|	2.58e-180	hypothetical protein F775_10097 [Aegilops tauschii]
TCONS_00161295	7A	53233580	53234323	0.000511905	gi|474088293|gb|EMS54746.1|	2.48e-26	hypothetical protein TRIUR3_25161 [Triticum urartu]
TCONS_00107599	4D	53555560	53555916	0.00284896	gi|475536086|gb|EMT08858.1|	2.4e-152	hypothetical protein F775_24051 [Aegilops tauschii]
TCONS_00159093	7A	53718906	53719623	0.000603905	gi|473912686|gb|EMS49632.1|	0	ADP,ATP carrier protein, mitochondrial [Triticum urartu]
TR171486_c0_g2_i5	6D	53739782	53740753	0.00285185	gi|475546999|gb|EMT10788.1|	9.82e-176	Zinc finger CCCH domain-containing protein 14 [Aegilops tauschii]
TR189721_c0_g1_i1	3B	53885781	53887082	5.64e-05	gi|475402080|gb|EMT00808.1|	0	GDSL esterase/lipase [Aegilops tauschii]
TR233781_c3_g3_i4	7B	53968737	53977125	0.0447473	gi|474265668|gb|EMS60712.1|	2.12e-07	hypothetical protein TRIUR3_07005 [Triticum urartu]
TCONS_00045532	2D	54154802	54155467	0.00241363	gi|474156691|gb|EMS57129.1|	4.85e-150	Transmembrane protein 87B [Triticum urartu]
TR227161_c2_g3_i10	2D	54202831	54218384	0.0336799	gi|474051357|gb|EMS53660.1|	2.26e-74	Zinc finger Ran-binding domain-containing protein 3 [Triticum urartu]
TCONS_00018363	1D	54204786	54206271	0.00809198	gi|475544456|gb|EMT10331.1|	0	Group XV phospholipase A2 [Aegilops tauschii]
TCONS_00018367	1D	54314626	54316951	0.0343677	gi|475604019|gb|EMT25602.1|	3.21e-40	F-box/WD-40 repeat-containing protein [Aegilops tauschii]
TCONS_00134543	6A	54645045	54645912	7.52e-05	gi|475483398|gb|EMT03039.1|	4.01e-32	hypothetical protein F775_00576 [Aegilops tauschii]
TCONS_00115390	5B	54654492	54654918	0.0340944	NA	NA	NA
TR197617_c3_g1_i1	4A	55083274	55089532	0.00372191	gi|474451162|gb|EMS68877.1|	4.23e-13	hypothetical protein TRIUR3_24803 [Triticum urartu]
TCONS_00105097	4D	55160353	55161408	0.0120683	gi|475565032|gb|EMT14682.1|	0	Disease resistance protein RGA2 [Aegilops tauschii]
TCONS_00120221	5B	55714451	55715237	0.0175824	gi|475610924|gb|EMT27907.1|	3.49e-117	Lectin-domain containing receptor kinase A4.2 [Aegilops tauschii]
TCONS_00038837	2B	56033593	56034291	0.0317934	NA	NA	NA
TCONS_00148377	6D	56414589	56414668	0.013651	gi|475519331|gb|EMT06325.1|	2.76e-72	hypothetical protein F775_26388 [Aegilops tauschii]
TR196286_c0_g1_i3	4A	56439629	56441292	0.00493398	gi|474434231|gb|EMS68137.1|	2.01e-12	hypothetical protein TRIUR3_12323 [Triticum urartu]
TCONS_00105131	4D	56514274	56515090	0.0275643	gi|475478969|gb|EMT02760.1|	0	Peroxidase 4 [Aegilops tauschii]
TR94644_c0_g1_i2	2B	56940458	56942006	0.000328717	gi|669031317|emb|CDM86223.1|	7.64e-125	unnamed protein product [Triticum aestivum]
TCONS_00059997	3B	56954356	56956385	0.0374553	gi|326501600|dbj|BAK02589.1|	0	predicted protein [Hordeum vulgare subsp. vulgare]
TCONS_00087071	4A	57399554	57399598	0.0354491	gi|414866282|tpg|DAA44839.1|	8.43e-133	TPA: hypothetical protein ZEAMMB73_049352 [Zea mays]
TR205545_c1_g1_i7	7B	57860477	57862371	0.0449522	gi|326488589|dbj|BAJ93963.1|	0	predicted protein [Hordeum vulgare subsp. vulgare]
TCONS_00120249	5B	58086930	58087678	0.0455198	gi|326525553|dbj|BAJ88823.1|	4.46e-129	predicted protein, partial [Hordeum vulgare subsp. vulgare]
TCONS_00093294	4A	58227180	58227901	0.00203122	NA	NA	NA
TCONS_00083954	3D	58608708	58609311	0.0396927	gi|474399180|gb|EMS65936.1|	1.22e-12	hypothetical protein TRIUR3_04716 [Triticum urartu]
TR230142_c0_g1_i3	2B	59135614	59137139	0.0423007	gi|475570056|gb|EMT15914.1|	3.61e-114	Putative WRKY transcription factor 41 [Aegilops tauschii]
TR181852_c1_g3_i7	3D	59402745	59409309	0.0117753	gi|669030080|emb|CDM84487.1|	0	unnamed protein product [Triticum aestivum]
TR181852_c1_g3_i4	3D	59402745	59409309	0.0227365	gi|669030080|emb|CDM84487.1|	0	unnamed protein product [Triticum aestivum]
TCONS_00083993	3D	59402745	59403927	0.00645067	gi|669030080|emb|CDM84487.1|	0	unnamed protein product [Triticum aestivum]
TCONS_00038885	2B	59404887	59405462	0.0498129	gi|326516130|dbj|BAJ88088.1|	1.35e-168	predicted protein [Hordeum vulgare subsp. vulgare]
TCONS_00085903	3D	59432397	59433195	0.00283381	NA	NA	NA
TCONS_00105179	4D	59530725	59531456	0.0254097	gi|475443009|gb|EMT01486.1|	5.52e-08	hypothetical protein F775_18204 [Aegilops tauschii]
TCONS_00090580	4A	60024669	60025131	0.0017823	gi|357112894|ref|XP_003558240.1|	0	PREDICTED: laccase-10-like [Brachypodium distachyon]
TR224608_c0_g1_i9	6A	60066957	60073902	0.0121786	gi|475595959|gb|EMT23224.1|	9.55e-80	Fimbrin-like protein 2 [Aegilops tauschii]
TCONS_00058503	3A	60400296	60400988	0.0201875	NA	NA	NA
TCONS_00033742	2B	60618760	60621649	0.0277551	gi|115473825|ref|NP_001060511.1|	0	Os07g0657400 [Oryza sativa Japonica Group]
TCONS_00085912	3D	60685734	60686740	0.00520626	gi|148372276|gb|ABQ63060.1|	3.94e-45	gag polyprotein [Triticum monococcum subsp. aegilopoides]
TCONS_00050074	2D	61020901	61022753	0.000929823	gi|475562409|gb|EMT14020.1|	0	hypothetical protein F775_03565 [Aegilops tauschii]
TCONS_00090596	4A	61081830	61082435	0.0265175	gi|147225072|emb|CAI96512.1|	1.99e-134	26.4kDa heat-shock protein [Triticum dicoccoides]
TCONS_00105208	4D	61125287	61125617	0.0170666	NA	NA	NA
TCONS_00087135	4A	61732875	61733558	0.035366	gi|357113138|ref|XP_003558361.1|	0	PREDICTED: uncharacterized protein LOC100843093 [Brachypodium distachyon]
TCONS_00099023	4B	62327253	62327731	0.0413685	gi|326496815|dbj|BAJ98434.1|	5.28e-74	predicted protein [Hordeum vulgare subsp. vulgare]
TCONS_00134605	6A	62533760	62534273	0.0123611	gi|10140673|gb|AAG13508.1|AC068924_13	0	putative gag-pol polyprotein [Oryza sativa Japonica Group]
TR170702_c0_g1_i9	6A	62655527	62668447	0.00583885	gi|226505808|ref|NP_001141176.1|	1.1e-137	hypothetical protein [Zea mays]
TR189459_c0_g2_i11	6A	63069828	63071148	0.00143691	gi|359950730|gb|AEV91155.1|	1.49e-23	R2R3-MYB protein [Aegilops tauschii]
TCONS_00176048	7D	63159706	63160165	0.0437492	gi|326502260|dbj|BAJ95193.1|	3.37e-57	predicted protein [Hordeum vulgare subsp. vulgare]
TCONS_00162563	7B	63387865	63387971	0.00469791	gi|475579722|gb|EMT18413.1|	3.33e-41	MADS-box transcription factor 56 [Aegilops tauschii]
TCONS_00070592	3B	63409006	63411492	0.0183162	gi|669027708|emb|CDM81254.1|	0	unnamed protein product [Triticum aestivum]
TCONS_00115472	5B	63551624	63552092	0.0146247	gi|326523175|dbj|BAJ88628.1|	0	predicted protein [Hordeum vulgare subsp. vulgare]
TCONS_00120339	5B	63714483	63715093	0.00681626	gi|326523989|dbj|BAJ97005.1|	0	predicted protein [Hordeum vulgare subsp. vulgare]
TR222594_c0_g1_i3	4D	64345363	64347779	0.0131932	gi|326506040|dbj|BAJ91259.1|	0	predicted protein [Hordeum vulgare subsp. vulgare]
TCONS_00060121	3B	64414213	64414287	0.00571693	gi|413915831|gb|AFW21595.1|	2.25e-20	hypothetical protein ZEAMMB73_516328 [Zea mays]
TCONS_00140608	6A	65308100	65309075	0.0010521	gi|326487153|dbj|BAJ89561.1|	2.54e-18	predicted protein [Hordeum vulgare subsp. vulgare]
TR178751_c0_g2_i3	1D	65522309	65523238	0.00279395	gi|475553596|gb|EMT12056.1|	8.99e-32	hypothetical protein F775_43762 [Aegilops tauschii]
TCONS_00004830	1A	65620562	65621835	0.00561751	gi|475563476|gb|EMT14284.1|	0	Putative LRR receptor-like serine/threonine-protein kinase [Aegilops tauschii]
TCONS_00013344	1B	65717978	65718579	0.00167799	gi|475544457|gb|EMT10332.1|	0	Peroxidase 5 [Aegilops tauschii]
TCONS_00090680	4A	66187787	66188929	0.0116297	gi|474404202|gb|EMS66305.1|	0	Peptide transporter PTR2 [Triticum urartu]
TR216049_c0_g1_i6	3A	66341888	66346615	0.0272355	gi|473792922|gb|EMS46368.1|	0	hypothetical protein TRIUR3_28161 [Triticum urartu]
[truncated: 892 more rows]
